# Supplementary material
Source: PubMed Central journal article supplement (PMC9132914)
Supplement: 41598_2022_12853_MOESM1_ESM.pdf [file 41598_2022_12853_MOESM1_ESM.pdf]

# **A comprehensive evaluation of COVID-19 policies and outcomes in 50 countries and territories**

Hsiao-Hui Tsou<sup>1,2\*</sup>, Shu-Chen Kuo<sup>3</sup>, Yu-Hsuan Lin<sup>1,4,5,6</sup>, Chao A. Hsiung<sup>1</sup>, Hung-Yi Chiou<sup>1,7,8</sup>, Wei J. Chen<sup>9,10</sup>, Shiow-Ing Wu<sup>1</sup>, Huey-Kang Sytwu<sup>3</sup>, Pau-Chung Chen<sup>11,12,13,14</sup>, Meng-Hsuan Wu<sup>1</sup>, Ya-Ting Hsu<sup>1</sup>, Hsiao-Yu Wu<sup>1</sup>, Fang-Jing Lee<sup>15</sup>, Shu-Man Shih<sup>1</sup>, Ding-Ping Liu<sup>16,17</sup>, Shan-Chwen Chang<sup>18</sup>.

<sup>1</sup> Institute of Population Health Sciences, National Health Research Institutes, Zhunan, Miaoli County, Taiwan

<sup>2</sup> Graduate Institute of Biostatistics, College of Public Health, China Medical University, Taichung, Taiwan

<sup>3</sup> National Institute of Infectious Diseases and Vaccinology, National Health Research Institutes, Zhunan, Miaoli County, Taiwan

<sup>4</sup> Department of Psychiatry, National Taiwan University Hospital, Taipei, Taiwan

<sup>5</sup> Department of Psychiatry, College of Medicine, National Taiwan University, Taipei, Taiwan

<sup>6</sup> Institute of Health Behaviors and Community Sciences, College of Public Health, National Taiwan University, Taipei, Taiwan

<sup>7</sup> School of Public Health, College of Public Health, Taipei Medical University, Taipei,

Taiwan

<sup>8</sup> Master's Program in Applied Epidemiology, College of Public Health, Taipei Medical University, Taipei, Taiwan

<sup>9</sup> Center for Neuropsychiatric Research, National Health Research Institutes, Zhunan, Miaoli County, Taiwan

<sup>10</sup> Institute of Epidemiology and Preventive Medicine, College of Public Health, National Taiwan University, Taipei, Taiwan

<sup>11</sup> National Institute of Environmental Health Sciences, National Health Research Institutes, Zhunan, Miaoli County, Taiwan

<sup>12</sup> Institute of Environmental and Occupational Health Sciences, National Taiwan University College of Public Health, Taipei, Taiwan

<sup>13</sup> Department of Public Health, National Taiwan University College of Public Health, Taipei, Taiwan

<sup>14</sup> Department of Environmental and Occupational Medicine, National Taiwan University Hospital and National Taiwan University College of Medicine, Taipei, Taiwan

<sup>15</sup> National Mosquito-Borne Diseases Control Research Center, National Health Research Institutes, Zhunan, Miaoli County, Taiwan

<sup>16</sup> Taiwan Centers for Disease Control, Taipei, Taiwan

<sup>17</sup> Department of Health Care Management, National Taipei University of Nursing and Health Sciences, Taipei, Taiwan

<sup>18</sup> Department of Internal Medicine, National Taiwan University Hospital, Taipei, Taiwan

# Supplementary Information

## Contents

|                                                                                                                                                                                        |    |
|----------------------------------------------------------------------------------------------------------------------------------------------------------------------------------------|----|
| Supplementary Information 1. Economist Intelligence Unit, EIU <sup>1</sup> .....                                                                                                       | 10 |
| <i>Supplementary Table S1. Quality of response and risk factors in EIU</i> .....                                                                                                       | 10 |
| Supplementary Information 2. Oxford COVID-19 Government Response Tracker (OxCGRT) <sup>2</sup> .....                                                                                   | 11 |
| Supplementary Information 3. NLI Research Institute <sup>3</sup> .....                                                                                                                 | 11 |
| Supplementary Information 4. Statistical methods.....                                                                                                                                  | 12 |
| <i>Supplementary Table S2. Impact of stringency index in month <math>s</math> on one-month cases per 100,000 members of the population in month <math>s+1</math></i> .....             | 13 |
| <i>Supplementary Table S3. Impact of lockdown efficiency in month <math>s</math> on one-month cases per 100,000 members of the population in month <math>s+1</math></i> .....          | 14 |
| <i>Supplementary Table S4. Impact of health-system policies in month <math>s</math> on the fatality rate in month <math>s+1</math></i> .....                                           | 14 |
| Supplementary Information 5. Lockdown Efficiency .....                                                                                                                                 | 15 |
| <i>Supplementary Figure S1. Lockdown efficiency, a transformation of stringency index to incidence rate</i> .....                                                                      | 16 |
| <i>Supplementary Table S5. Percentage of countries with improved/worsened status in month <math>s+1</math> as compared to their respective statuses in month <math>s</math>.</i> ..... | 18 |
| <i>Supplementary Figure S2. Lockdown efficiency in March 2020</i> .....                                                                                                                | 19 |
| <i>Supplementary Figure S3. Lockdown efficiency in April 2020</i> .....                                                                                                                | 20 |
| <i>Supplementary Figure S4. Lockdown efficiency in May 2020</i> .....                                                                                                                  | 20 |
| <i>Supplementary Figure S5. Lockdown efficiency in June 2020</i> .....                                                                                                                 | 21 |
| <i>Supplementary Figure S6. Lockdown efficiency in July 2020</i> .....                                                                                                                 | 21 |
| <i>Supplementary Figure S7. Lockdown efficiency in August 2020</i> .....                                                                                                               | 22 |
| <i>Supplementary Figure S8. Lockdown efficiency in September 2020</i> .....                                                                                                            | 22 |
| <i>Supplementary Figure S9. Lockdown efficiency in October 2020</i> .....                                                                                                              | 23 |
| <i>Supplementary Figure S10. Lockdown efficiency in November 2020</i> .....                                                                                                            | 23 |
| Supplementary Information 6. Google Trends .....                                                                                                                                       | 24 |

|                                                                                                                                                                                                         |           |
|---------------------------------------------------------------------------------------------------------------------------------------------------------------------------------------------------------|-----------|
| Supplementary Information 7. Conversion of the ten indicators on “government policies & hygiene education” and “vital health & socioeconomic” measures.....                                             | 26        |
| Supplementary Information 8. Overall COVID-19 containment ranking of 50 countries and territories from March 2020 to November 2021 .....                                                                | 29        |
| <i>Supplementary Table S6. Overall COVID-19 containment ranking (with Google Trends) .....</i>                                                                                                          | <i>29</i> |
| <i>Supplementary Table S7. Overall COVID-19 containment ranking (without Google Trends).....</i>                                                                                                        | <i>39</i> |
| Supplementary Information 9. Different baseline risk levels of 50 countries and territories and their respective COVID-19 containment scores (with Google Trends) from March 2020 to November 2021..... | 50        |
| <i>Supplementary Figure S11. Different baseline risk levels of 50 countries and territories and their respective COVID-19 containment scores (with Google Trends) in March 2020.....</i>                | <i>51</i> |
| <i>Supplementary Figure S12. Different baseline risk levels of 50 countries and territories and their respective COVID-19 containment scores (with Google Trends) in April 2020 .....</i>               | <i>51</i> |
| <i>Supplementary Figure S13. Different baseline risk levels of 50 countries and territories and their respective COVID-19 containment scores (with Google Trends) in May 2020 .....</i>                 | <i>52</i> |
| <i>Supplementary Figure S14. Different baseline risk levels of 50 countries and territories and their respective COVID-19 containment scores (with Google Trends) in June 2020.....</i>                 | <i>52</i> |
| <i>Supplementary Figure S15. Different baseline risk levels of 50 countries and territories and their respective COVID-19 containment scores (with Google Trends) in July 2020.....</i>                 | <i>53</i> |
| <i>Supplementary Figure S16. Different baseline risk levels of 50 countries and territories and their respective COVID-19 containment scores (with Google Trends) in August 2020 .....</i>              | <i>53</i> |
| <i>Supplementary Figure S17. Different baseline risk levels of 50 countries and territories and their respective COVID-19 containment scores (with Google Trends) in September 2020.....</i>            | <i>54</i> |
| <i>Supplementary Figure S18. Different baseline risk levels of 50 countries and territories and their respective COVID-19 containment scores (with Google Trends) in October 2020.....</i>              | <i>54</i> |
| <i>Supplementary Figure S19. Different baseline risk levels of 50 countries and territories and their respective COVID-19 containment scores (with Google Trends) in November 2020 .....</i>            | <i>55</i> |
| <i>Supplementary Figure S20. Different baseline risk levels of 50 countries and territories and their respective COVID-19 containment scores (with Google Trends) in December 2020 .....</i>            | <i>55</i> |
| <i>Supplementary Figure S21. Different baseline risk levels of 50 countries and territories and their respective COVID-19 containment scores (with Google Trends) in January 2021 .....</i>             | <i>56</i> |

|                                                                                                                                                                                                                                                  |    |
|--------------------------------------------------------------------------------------------------------------------------------------------------------------------------------------------------------------------------------------------------|----|
| <i>Supplementary Figure S22. Different baseline risk levels of 50 countries and territories and their respective COVID-19 containment scores (with Google Trends) in February 2021</i> .....                                                     | 56 |
| <i>Supplementary Figure S23. Different baseline risk levels of 50 countries and territories and their respective COVID-19 containment scores (with Google Trends) in March 2021</i> .....                                                        | 57 |
| <i>Supplementary Figure S24. Different baseline risk levels of 50 countries and territories and their respective COVID-19 containment scores (with Google Trends) in April 2021</i> .....                                                        | 57 |
| <i>Supplementary Figure S25. Different baseline risk levels of 50 countries and territories and their respective COVID-19 containment scores (with Google Trends) in May 2021</i> .....                                                          | 58 |
| <i>Supplementary Figure S26. Different baseline risk levels of 50 countries and territories and their respective COVID-19 containment scores (with Google Trends) in June 2021</i> .....                                                         | 58 |
| <i>Supplementary Figure S27. Different baseline risk levels of 50 countries and territories and their respective COVID-19 containment scores (with Google Trends) in July 2021</i> .....                                                         | 59 |
| <i>Supplementary Figure S28. Different baseline risk levels of 50 countries and territories and their respective COVID-19 containment scores (with Google Trends) in August 2021</i> .....                                                       | 59 |
| <i>Supplementary Figure S29. Different baseline risk levels of 50 countries and territories and their respective COVID-19 containment scores (with Google Trends) in September 2021</i> .....                                                    | 60 |
| <i>Supplementary Figure S30. Different baseline risk levels of 50 countries and territories and their respective COVID-19 containment scores (with Google Trends) in October 2021</i> .....                                                      | 60 |
| <i>Supplementary Figure S31. Different baseline risk levels of 50 countries and territories and their respective COVID-19 containment scores (with Google Trends) in November 2021</i> .....                                                     | 61 |
| <i>Supplementary Figure S32a. The comparison of performance scores among three levels of baseline risk from March 2020 to November 2021, with vaccination indicator only from December 2020 to November 2021 (marked light blue area).</i> ..... | 61 |
| <i>Supplementary Figure S32b. The comparison of people covered by vaccines among three levels of baseline risk from December 2020 to November 2021</i> .....                                                                                     | 62 |
| Supplementary Information 10. Two-sample t-test and Mann-Whitney U test of comparison between Latin American and non-Latin American nations .....                                                                                                | 63 |
| <i>Supplementary Table S8. Comparison of the overall containment effectiveness between Latin American and non-Latin American countries from March to November 2020</i> .....                                                                     | 65 |
| <i>Supplementary Table S9. Comparison of government policy &amp; hygiene education indicators between Latin American and non-Latin American countries from March 2020 to November 2020</i> .....                                                 | 67 |

|                                                                                                                                                                                           |     |
|-------------------------------------------------------------------------------------------------------------------------------------------------------------------------------------------|-----|
| <i>Supplementary Table S10. Comparison of vital health &amp; socioeconomic indicators between Latin American and non-Latin American countries from March 2020 to November 2020</i> .....  | 69  |
| Supplementary Information 11. Two-sample t-test and Mann-Whitney U test of government actions and COVID-19 containment effectiveness for Asian and non-Asian nations and territories..... | 73  |
| <i>Supplementary Table S11. Comparison of government actions between Asian and non-Asian nations and territories from March 2020 to November 2020</i> .....                               | 74  |
| <i>Supplementary Table S12. Comparison of the containment effectiveness between Asian and non-Asian nations and territories from March 2020 to November 2020</i> .....                    | 76  |
| Supplementary Information 12. Complete ranking and raw scores of 50 countries and territories, from March 2020 to November 2021 .....                                                     | 78  |
| <i>Supplementary Table S13. Complete ranking and raw scores of indicators in 50 countries and territories in March 2020</i> .....                                                         | 78  |
| <i>Supplementary Table S14. Complete ranking and raw scores of indicators in 50 countries and territories in April 2020</i> .....                                                         | 81  |
| <i>Supplementary Table S15. Complete ranking and raw scores of indicators in 50 countries and territories in May 2020</i> .....                                                           | 84  |
| <i>Supplementary Table S16. Complete ranking and raw scores of indicators in 50 countries in June 2020</i> .....                                                                          | 87  |
| <i>Supplementary Table S17. Complete ranking and raw scores of indicators in 50 countries and territories in July 2020</i> .....                                                          | 90  |
| <i>Supplementary Table S18. Complete ranking and raw scores of indicators in 50 countries and territories in August 2020</i> .....                                                        | 93  |
| <i>Supplementary Table S19. Complete ranking and raw scores of indicators in 50 countries and territories in September 2020</i> .....                                                     | 96  |
| <i>Supplementary Table S20. Complete ranking and raw scores of indicators in 50 countries and territories in October 2020</i> .....                                                       | 99  |
| <i>Supplementary Table S21. Complete ranking and raw scores of indicators in 50 countries and territories in November 2020</i> .....                                                      | 102 |
| <i>Supplementary Table S22. Complete ranking and raw scores of indicators in 50 countries and territories in December 2020</i> .....                                                      | 104 |
| <i>Supplementary Table S23. Complete ranking and raw scores of indicators in 50 countries and territories in January 2021</i> .....                                                       | 107 |

|                                                                                                                                                                                                                         |     |
|-------------------------------------------------------------------------------------------------------------------------------------------------------------------------------------------------------------------------|-----|
| <i>Supplementary Table S24. Complete ranking and raw scores of indicators in 50 countries and territories in February 2021</i> .....                                                                                    | 110 |
| <i>Supplementary Table S25. Complete ranking and raw scores of indicators in 50 countries and territories in March 2021</i> .....                                                                                       | 113 |
| <i>Supplementary Table S26. Complete ranking and raw scores of indicators in 50 countries and territories in April 2021</i> .....                                                                                       | 116 |
| <i>Supplementary Table S27. Complete ranking and raw scores of indicators in 50 countries and territories in May 2021</i> .....                                                                                         | 119 |
| <i>Supplementary Table S28. Complete ranking and raw scores of indicators in 50 countries and territories in June 2021</i> .....                                                                                        | 122 |
| <i>Supplementary Table S29. Complete ranking and raw scores of indicators in 50 countries and territories in July 2021</i> .....                                                                                        | 125 |
| <i>Supplementary Table S30. Complete ranking and raw scores of indicators in 50 countries and territories in August 2021</i> .....                                                                                      | 128 |
| <i>Supplementary Table S31. Complete ranking and raw scores of indicators in 50 countries and territories in September 2021</i> .....                                                                                   | 131 |
| <i>Supplementary Table S32. Complete ranking and raw scores of indicators in 50 countries and territories in October 2021</i> .....                                                                                     | 134 |
| <i>Supplementary Table S33. Complete ranking and raw scores of indicators in 50 countries and territories in November 2021</i> .....                                                                                    | 137 |
| Supplementary Information 13. Sensitivity analysis.....                                                                                                                                                                 | 140 |
| <i>Supplementary Table S34. List of 50 countries and territories included in the analysis</i> .....                                                                                                                     | 142 |
| <i>Supplementary Table S35: Summary of sensitivity analysis for COVID-19 pandemic performance</i><br>.....                                                                                                              | 144 |
| <i>Supplementary Table S36. Rankings of 50 countries and territories March–November 2020, excluding indicators of health literacy and insomnia (one-way sensitivity analysis)</i> .....                                 | 146 |
| <i>Supplementary Table S37. Rankings of 50 countries and territories March–November 2020 by a three-month moving average, excluding indicators of health literacy and insomnia (two-way sensitivity analysis)</i> ..... | 149 |
| <i>Supplementary Table S38. Rankings of 50 countries and territories March–October 2020, excluding indicators of health literacy and insomnia (three-way sensitivity analysis)</i> .....                                | 152 |



|                                                                                                                                                                                                              |     |
|--------------------------------------------------------------------------------------------------------------------------------------------------------------------------------------------------------------|-----|
| <i>Supplementary Table S39. Rankings of 50 countries and territories March–October 2020, excluding indicators of health literacy and insomnia (two-way sensitivity analysis)</i> .....                       | 155 |
| <i>Supplementary Table S40. Rankings of 50 countries and territories March–October 2020, excluding indicators of health literacy, insomnia, and unemployment rate (three-way sensitivity analysis)</i> ..... | 158 |
| <i>Supplementary Table S41. Rankings of 50 countries and territories March–November 2020 (two-way sensitivity analysis)</i> .....                                                                            | 161 |
| <i>Supplementary Table S42. Rankings of 50 countries and territories March–November 2020 by a three-month moving average (three-way sensitivity analysis)</i> .....                                          | 164 |
| <i>Supplementary Table S43. Rankings of 50 countries and territories March–October 2020 (four-way sensitivity analysis)</i> .....                                                                            | 167 |
| <i>Supplementary Table S44. Rankings of 50 countries and territories March–October 2020 (three-way sensitivity analysis)</i> .....                                                                           | 170 |
| <i>Supplementary Table S45. Rankings of 50 countries and territories March 2020–July 2021 (with Google Trends)<sup>a</sup></i> .....                                                                         | 173 |
| <i>Supplementary Table S46. Rankings of 50 countries and territories March 2020–August 2021 (without Google Trends)<sup>a</sup></i> .....                                                                    | 180 |
| Supplementary Information 14. Vaccination Coverage .....                                                                                                                                                     | 188 |
| <i>Supplementary Table S47. Association between people covered by vaccines and one-month cases per 100,000 members of the population from December 2020 to August 2021.</i> .....                            | 188 |
| <i>Supplementary Table S48. Association between people covered by vaccines and infection growth rate from December 2020 to August 2021.</i> .....                                                            | 190 |
| <i>Supplementary Table S49. Association between people covered by vaccines and one-month case fatality rate from December 2020 to August 2021.</i> .....                                                     | 192 |
| Supplementary Information 15. COVID-19 government responses in border closure.....                                                                                                                           | 194 |
| <i>Supplementary Table S50. Comparison of the time to border closure among geographic regions.</i> .....                                                                                                     | 194 |

## Supplementary Information 1. Economist Intelligence Unit, EIU<sup>1</sup>

Economist Intelligence Unit (EIU) ranks 21 countries in terms of “quality of response” and “risk factors”. The “quality of response” consists of three indicators (1) the number of people tested for COVID-19, (2) provision of non-COVID-19 health care, and (3) death rates for COVID-19. The “risk factors” are (1) obesity prevalence, (2) the share of the population over the age of 65, and (3) international arrivals. Supplementary Table S1 displays the definitions of the “quality of response” indicators and “risk factors”. By weighting the death rate as four and the other five indicators as one, the EIU constructs the score for each nation by averaging the six indicators.<sup>1</sup>

**Supplementary Table S1. Quality of response and risk factors in EIU**

| Quality of response                                                                | Score |
|------------------------------------------------------------------------------------|-------|
| Tests (tests per million people)                                                   |       |
| <10,000                                                                            | 1     |
| 10,000–20,000                                                                      | 2     |
| 20,000–50,000                                                                      | 3     |
| >50,000                                                                            | 4     |
| Provision of non-COVID-19 healthcare (share of cancer-related surgeries cancelled) |       |
| >50%                                                                               | 1     |
| 40–50%                                                                             | 2     |
| 30–40%                                                                             | 3     |
| <30%                                                                               | 4     |
| Death rate (excess deaths per million people)                                      |       |
| >600                                                                               | 1     |
| 400–600                                                                            | 2     |
| 200–400                                                                            | 3     |
| <200                                                                               | 4     |
| <b>Risk factors</b>                                                                |       |
| Obesity prevalence (share of obese people, age-standardized)                       |       |
| <20%                                                                               | 1     |
| 20–25%                                                                             | 2     |
| 25–30%                                                                             | 3     |
| >30%                                                                               | 4     |
| Share of the population aged 65+ (percentage of population aged 65 and over)       |       |
| <10%                                                                               | 1     |
| 10–15%                                                                             | 2     |
| 15–20%                                                                             | 3     |

---

|                                                                                        |   |
|----------------------------------------------------------------------------------------|---|
| >20%                                                                                   | 4 |
| International arrivals (number of international arrivals as a share of the population) |   |
| <40%                                                                                   | 1 |
| 40–70%                                                                                 | 2 |
| 70–100%                                                                                | 3 |
| >100%                                                                                  | 4 |

---

## **Supplementary Information 2. Oxford COVID-19 Government Response Tracker (OxCGRT)<sup>2</sup>**

The Oxford COVID-19 Government Response Tracker (OxCGRT)<sup>2</sup> provides a systematic way of tracking government responses to COVID-19 in over 180 nations. The data is characterized into indicators that aggregate various measures of government responses, including containment and closure policies, economic policies, health-system policies and miscellaneous policies.<sup>2</sup> These indicators aim to identify each government action, and its intensity and effectiveness in curbing the rate of infection. Data is collected and updated by a team of over 100 Oxford students, alumni, staff, and project partners.

## **Supplementary Information 3. NLI Research Institute<sup>3</sup>**

The NLI Research Institute evaluates each country’s performance of epidemic preparedness and response in two domains: health and economic outcomes.<sup>3</sup> The indicators and indexes that are considered include the (1) cumulative number of COVID-19 cases, (2) infection growth rate, (3) fatality rate, and (4) GDP loss due to the pandemic. The cumulative number of COVID-19 cases is defined as the cumulative number of COVID-19 infections per 10,000 members of population, which measures the prevalence rate of the epidemic. The growth rate of the infection refers to the ratio of the number of new COVID-19 infections to the cumulative number of infections in the past two weeks, which is used to assess the development of the epidemic. The fatality rate is the ratio of the cumulative number of COVID-19 deaths to the cumulative number of COVID-19 infections, which is an indicator of whether a place is effective in treating infected people and preventing COVID-19 deaths. GDP loss is the year-to-year increase/decrease of the annual GDP growth rate before (2019) and during (2020) the pandemic.<sup>3</sup>

## Supplementary Information 4. Statistical methods

“Government policy & hygiene education” and “vital health & socioeconomic” measures are dynamic, meaning that they would vary over time and affect each other. We use linear mixed models to explore the relationship between “government policy & hygiene education” and “vital health & socioeconomic” measures in a two-stage method.

Let  $Y_{it}$  denote the outcome at the  $t^{\text{th}}$  time point for the  $i^{\text{th}}$  country. Then the model can be written as follows:

$$Y_{it} = \beta_0 + b_{i0} + \beta_1 X_{i,t-1} + \beta_2 \text{time}_{it} + \beta_3 X_{i,t-1} \times \text{time}_{it} + \varepsilon_{it},$$

where  $X_{i,t-1}$  denotes the predicted variables at the previous time point  $t-1$ . The selection of the lag value depends on the correlation coefficient, and a lag of one is chosen. The variable  $\text{time}_{it}$  is a categorical variable, which represents the observation time (month) of the  $t^{\text{th}}$  observation for the  $i^{\text{th}}$  country.  $X_{i,t-1} \times \text{time}_{it}$  are the interaction terms of the variables  $X_{i,t-1}$  and  $\text{time}_{it}$ . If the interaction term is not significant, the interaction term is removed from the model. The parameter  $\beta_0$  is a fixed-effect intercept term; the parameter  $b_{i0}$  is a random-effect intercept term, which represents the difference in intercept for the  $i^{\text{th}}$  country from the average intercept. The parameters  $\beta_1$ ,  $\beta_2$ , and  $\beta_3$  are fixed-effect coefficients, which are identical for all countries. The error term  $\varepsilon_{it}$  is the error for the  $i^{\text{th}}$  country at the  $t^{\text{th}}$  time point. The errors for country  $i$  are assumed to be multivariate normally distributed.

The steps of the two stages are as follows:

“Stage 1”: Create fitted values from a linear mixed model, where “government policy & hygiene education at time point  $t$ ” are the outcome variables and “vital health & socioeconomic measures at time point  $t-1$ ” are predictors.

“Stage 2”: Use stage 1 fitted values as the predictors to create a model of the outcome variable. The outcome variables refer to “vital health & socioeconomic measures at time  $t+1$ ”.

Supplementary Table S2 analyzes the impact of OxCGRT's “stringency index” in month  $s$  on the one-month cases per 100,000 members of the population in month  $s+1$ . For every unit of increase in stringency index in July 2020, the one-month cases per 100,000 members of the population in August 2020 increase by 7.83 people, which reaches statistical significance ( $P = 0.03$ ). However, this result does not meet with our expectation that a higher stringency index in month  $s$ , meaning government policies should be more rigorous, should lead to a lower one-month cases per 100,000 members of the population in the following month ( $s+1$ ). In addition, for every unit of increase in the stringency index in

October 2020, the one-month cases per 100,000 members of the population in November 2020 decrease by 14.53 people, which reaches statistical significance ( $P = 0.002$ ). Due to the inconsistency of the outcome produced by utilizing the stringency index, we determine that the stringency index does not have a strong correlation with one-month cases per 100,000 members of the population.

Supplementary Table S3 analyzes the impact of lockdown efficiency in month  $s$  on the one-month cases per 100,000 members of the population in month  $s+1$ . For every unit of increase of lockdown efficiency in September 2020, the one-month cases per 100,000 members of the population in October 2020 decrease by 629.55 people, which reaches statistical significance ( $P < 0.0001$ ). Similarly, for every unit of increase of lockdown efficiency in October 2020, the one-month cases per 100,000 members of the population in November 2020 decrease by 597.94 people, which also reaches statistical significance ( $P < 0.0001$ ). Although the relationship between lockdown efficiency in month  $s$  and one-month case per 100,000 members of the population in month  $s+1$  does not reach statistical significance in other periods, we still observe a trend that for every unit of increase in lockdown efficiency in month  $s$ , the one-month cases per 100,000 members of the population decrease in the following month ( $s+1$ ).

Supplementary Table S4 presents the impact of health-system policies in month  $s$  on the fatality rate in month  $s+1$ . For every unit of increase in health-system policies in April, the fatality rate in May 2020 decreases by 7.84%, which reaches statistical significance ( $P < 0.0001$ ). Similarly, for each unit of increase of health-system policies in May 2020, the fatality rate in June 2020 decreases by 3.86%, which is also statistically significant ( $P = 0.03$ ).

**Supplementary Table S2. Impact of stringency index in month  $s$  on one-month cases per 100,000 members of the population in month  $s+1$**

| Parameters               | Estimate | Standard Error | $P$ value |
|--------------------------|----------|----------------|-----------|
| Stringency index, $s=4$  | 1.26     | 4.38           | 0.77      |
| Stringency index, $s=5$  | 4.35     | 4.18           | 0.30      |
| Stringency index, $s=6$  | 6.87     | 3.94           | 0.08      |
| Stringency index, $s=7$  | 7.83     | 3.69           | 0.03      |
| Stringency index, $s=8$  | 6.87     | 4.22           | 0.10      |
| Stringency index, $s=9$  | -5.48    | 4.10           | 0.18      |
| Stringency index, $s=10$ | -14.53   | 4.75           | 0.002     |

**Supplementary Table S3. Impact of lockdown efficiency in month  $s$  on one-month cases per 100,000 members of the population in month  $s+1$**

| <b>Parameters</b>           | <b>Estimate</b> | <b>Standard Error</b> | <b><i>P</i> value</b> |
|-----------------------------|-----------------|-----------------------|-----------------------|
| Lockdown efficiency, $s=4$  | -69.78          | 113.20                | 0.54                  |
| Lockdown efficiency, $s=5$  | -61.25          | 112.48                | 0.59                  |
| Lockdown efficiency, $s=6$  | -56.12          | 116.49                | 0.63                  |
| Lockdown efficiency, $s=7$  | -46.95          | 116.57                | 0.69                  |
| Lockdown efficiency, $s=8$  | -142.91         | 113.53                | 0.21                  |
| Lockdown efficiency, $s=9$  | -629.55         | 118.97                | <0.0001               |
| Lockdown efficiency, $s=10$ | -597.94         | 128.28                | <0.0001               |

**Supplementary Table S4. Impact of health-system policies in month  $s$  on the fatality rate in month  $s+1$**

| <b>Parameters</b>              | <b>Estimate</b> | <b>Standard Error</b> | <b><i>P</i> value</b> |
|--------------------------------|-----------------|-----------------------|-----------------------|
| Health-system policies, $s=4$  | -7.84           | 1.74                  | <0.0001               |
| Health-system policies, $s=5$  | -3.86           | 1.74                  | 0.03                  |
| Health-system policies, $s=6$  | -0.21           | 1.82                  | 0.91                  |
| Health-system policies, $s=7$  | 0.77            | 1.80                  | 0.67                  |
| Health-system policies, $s=8$  | 1.23            | 1.78                  | 0.49                  |
| Health-system policies, $s=9$  | 0.53            | 1.93                  | 0.78                  |
| Health-system policies, $s=10$ | -0.01           | 2.07                  | 0.99                  |

## Supplementary Information 5. Lockdown Efficiency

The Oxford COVID-19 Government Response Tracker (OxCGRT) collects publicly available information on 24 indicators of government responses across the following four aspects: (1) containment and closure, (2) economic response, (3) health systems, and (4) vaccine policies.<sup>2</sup> These 24 indicators can also be aggregated into four common indices: the (1) government response index, (2) containment and health index, (3) economic support index, and (4) stringency index; each of the four indices is reported as a number between 0 and 100 by the formula provided by OxCGRT.<sup>2</sup> The stringency index is one of the policy indices measured by the OxCGRT; the indicators used for calculating the “stringency index” include school closing (C1), workplace closing (C2), cancel public events (C3), restrictions on gatherings (C4), close public transport (C5), stay at home requirements (C6), restrictions on internal movement (C7), international travel controls (C8), and public information campaign (H1).<sup>2</sup> Stringency index records the strictness of “lockdown style” policies that primarily restrict people’s behavior.<sup>2</sup> Nevertheless, the stringency index should not be interpreted as a measure of the appropriateness or effectiveness of a government’s response. The COVID-19 pandemic has caused many governments to implement lockdowns. Although lockdowns may help control the spread of the virus, they may also lead to mental health problems and economic damage. Therefore, the appropriateness of the implementation of various strictness levels of lockdown policies should consider the amount of COVID-19 cases in that particular nation and territory. Because of the trade-off between the stringency index and the incidence of COVID-19, we combine the two into a new indicator, “lockdown efficiency”, to compare the effectiveness of lockdown across countries; the incidence of COVID-19 for the first two weeks of the month and the average stringency index of the last two weeks of the month are used to present this (Supplementary Figure S1). Supplementary Figure S1 is inspired by the figure produced by Fernández-Villaverde & Jones.<sup>4</sup> The incidence of COVID-19 is calculated based on newly confirmed cases per million population.

In Supplementary Figure S1, we focus on the correlation between the average “stringency index” of the last two weeks of the month and the total “incidence of COVID-19” of the first two weeks of the month for a deeper observation of “lockdown efficiency”. We use the average “stringency index” of the last two weeks of the month and the total “incidence of COVID-19” of the first two weeks of the month to illustrate the subtle correlations that occur in the pandemic. There can be a positive correlation between the stringency index and the incidence of COVID-19. The lower the incidence, the less that stringent policy measures are required. The lower-left corner of Supplementary Figure S1 is the quadrant with the best outcomes. Good policies mean that countries in this location would have experienced comparatively few COVID cases as a fraction of their populations but have simultaneously kept economic losses relatively low. Conversely, in the adjacent quadrant, the higher the incidence, the more that stringent policy measures are required. This is also reasonable. Thus, the countries located in the lower-left corner of Supplementary Figure S1 are evaluated as having the best performance and are given four points,

while the countries located in the upper-right corner of Supplementary Figure S1 are evaluated as having the second-best performance and are given three points.

A strict policy can abruptly shut down the economy, which increases economic losses and mental health problems. To contain the spread of COVID-19 but still maintain a healthy economy, the government must carefully consider when to implement various policies. In the upper-left corner of Supplementary Figure S1, the incidence rate is low but stricter policy measures are implemented. In this case, such measures would unnecessarily increase mental health problems and losses in economic activity, given the low severity of the health crisis the country faces. However, in the adjacent quadrant, the high incidence rate does not lead to more rigorous policy measures, leading to the worst outcomes. Policy mistakes are likely responsible for poor performance in containing the virus. Thus, the countries located in the upper-left corner of Supplementary Figure S1 are given two points, while the countries located in the lower-right corner of Supplementary Figure S1 are evaluated as having the worst performance and are given one point.

**Supplementary Figure S1. Lockdown efficiency, a transformation of stringency index to incidence rate**

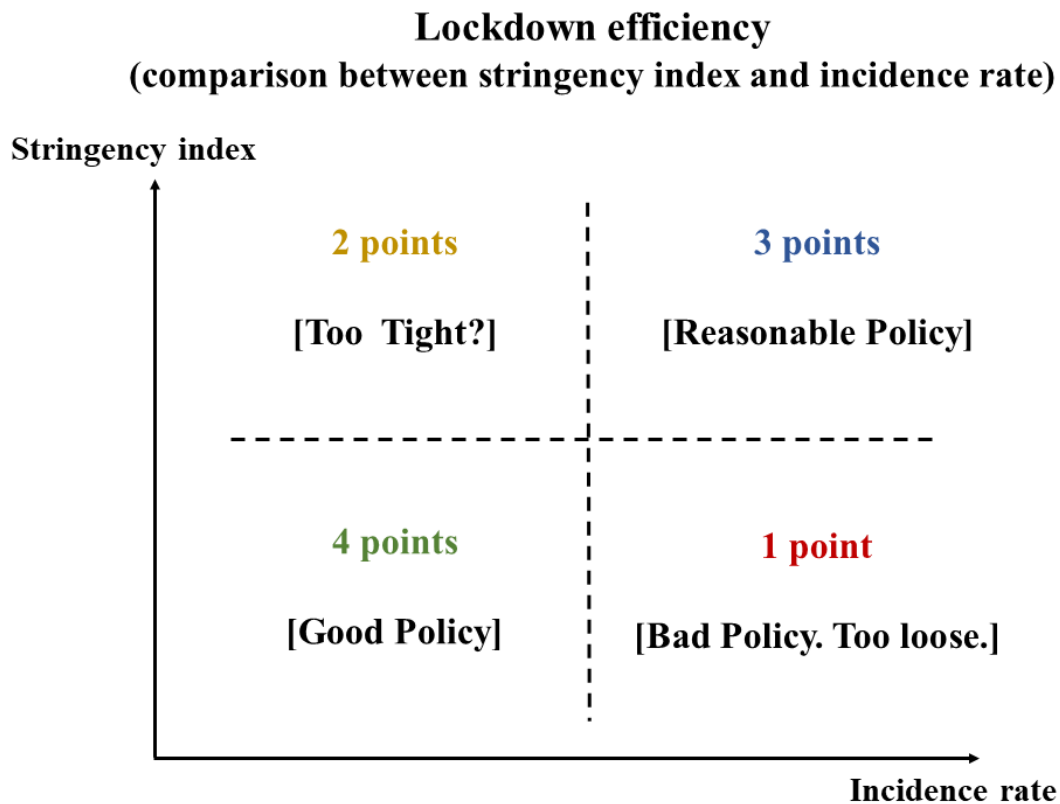

Note: Supplementary Figure S1 is inspired by the figure produced by Fernández-Villaverde & Jones.<sup>4</sup>

Now, we use real data to show why the countries in the upper-left corner of Supplementary Figure S1



are given two points but the countries in the upper-right corner are given three points. First, we come up with a new measurement, “status”, to indicate the decrease/increase of a country’s number of confirmed cases in a two-month period. If a country has a lower number of newly confirmed cases this month ( $s+1$ ) as compared to the previous month ( $s$ ), then the “status” of this country is defined as “better”. Conversely, the “status” of this country is defined as “worse”. Supplementary Table S5 presents the percentage of countries that became better or worse in month  $s+1$  when the countries are in the upper-left corner or upper-right corner of Supplementary Figure S1 in month  $s$ . For example, 33% of the countries located in the upper-right corner of Supplementary Figure S1 in March improved in April, while only 10% of countries located in the upper-left corner in March improved in April. In Supplementary Table S5, we find that the countries located in the upper-right corner of Supplementary Figure S1 in month  $s$  have a higher chance to improve in month  $s+1$  than the countries located in the upper-left corner in month  $s$ . Thus, it is reasonable that the countries in the upper-left corner of Supplementary Figure S1 are given two points while the countries in the upper-right corner are given three points.

**Supplementary Table S5. Percentage of countries with improved/worsened status in month s+1 as compared to their respective statuses in month s.**

| <b>“Lockdown efficiency” in month s</b> | <b>Status in this month</b> | <b>Apr</b> | <b>May</b> | <b>Jun</b> | <b>Jul</b> | <b>Aug</b> | <b>Sep</b> | <b>Oct</b> | <b>Nov</b> |
|-----------------------------------------|-----------------------------|------------|------------|------------|------------|------------|------------|------------|------------|
| <b>Upper-right corner of</b>            | Better                      | 33%        | 64%        | 60%        | 55%        | 67%        | 71%        | 47%        | 60%        |
|                                         | Worse                       | 67%        | 36%        | 40%        | 45%        | 33%        | 29%        | 53%        | 40%        |
| <b>Supplementary Figure S1</b>          |                             |            |            |            |            |            |            |            |            |
| <b>Upper-left corner of</b>             | Better                      | 10%        | 14%        | 30%        | 0%         | 43%        | 55%        | 30%        | 30%        |
|                                         | Worse                       | 90%        | 86%        | 70%        | 100%       | 57%        | 45%        | 70%        | 70%        |
| <b>Supplementary Figure S1</b>          |                             |            |            |            |            |            |            |            |            |

Supplementary Figures S2–S10 present “lockdown efficiency” as the average stringency index of the last two weeks of the month compared to the two-week total incidence of COVID-19 of the first two weeks of the month. The horizontal axis is the total “incidence of COVID-19”. The vertical axis shows the average “stringency index”. All countries considered are marked in the graphs as data points. We present the dynamics of how each country moves around this plane over time. One can divide the graph into four quadrants, based on higher versus lower incidence of COVID-19 and on higher versus lower value of the “stringency index”.

**Supplementary Figure S2. Lockdown efficiency in March 2020**

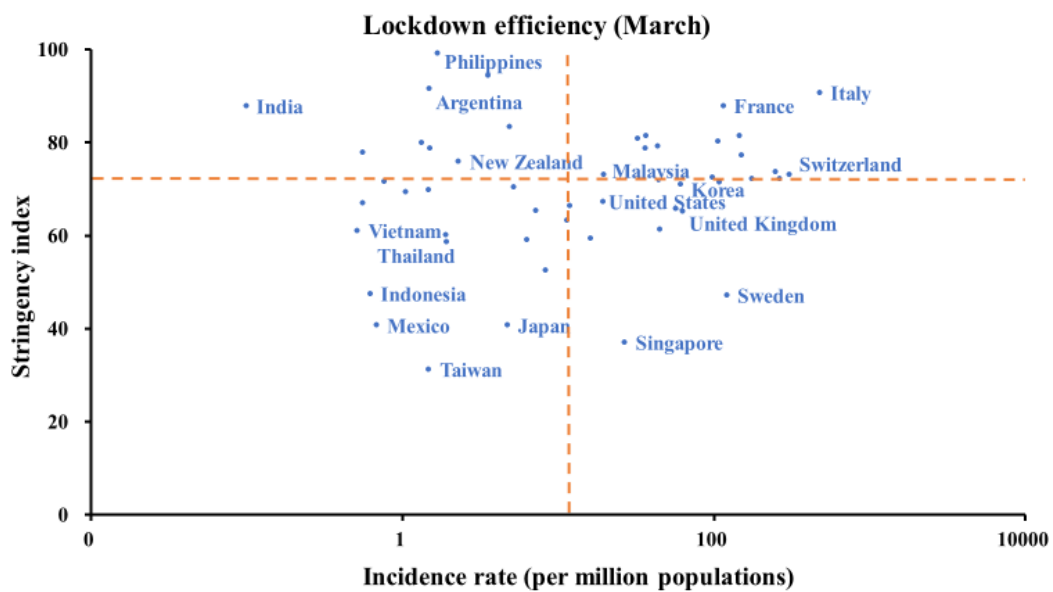

Supplementary Figure S3. Lockdown efficiency in April 2020

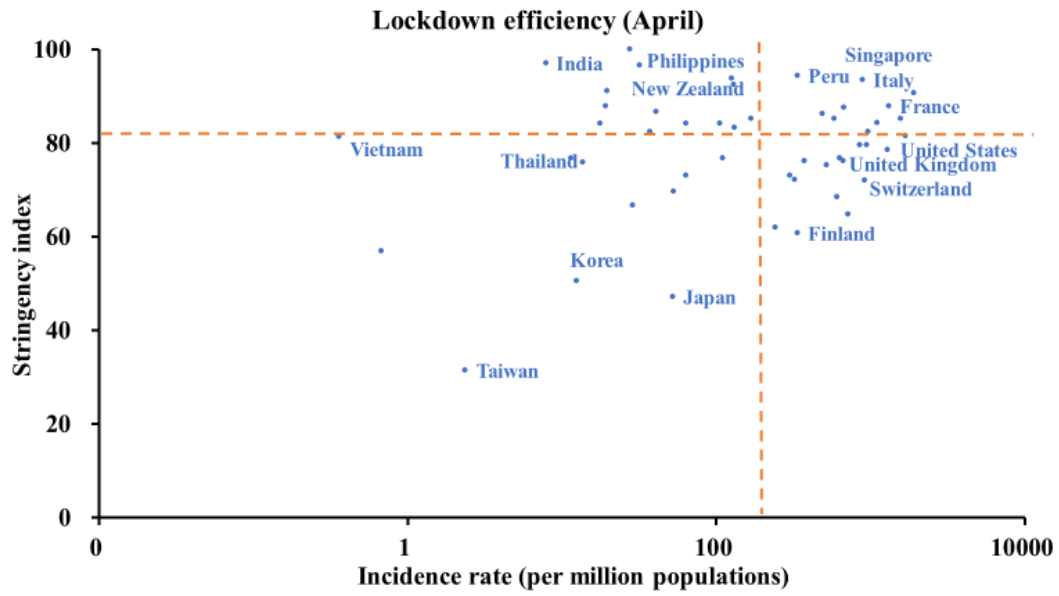

Supplementary Figure S4. Lockdown efficiency in May 2020

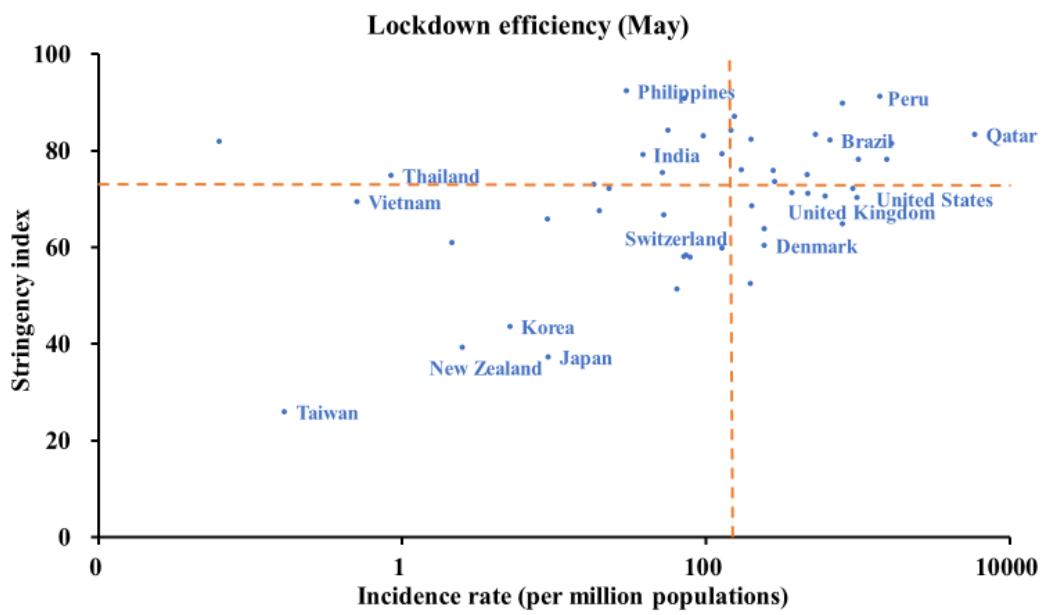

Supplementary Figure S5. Lockdown efficiency in June 2020

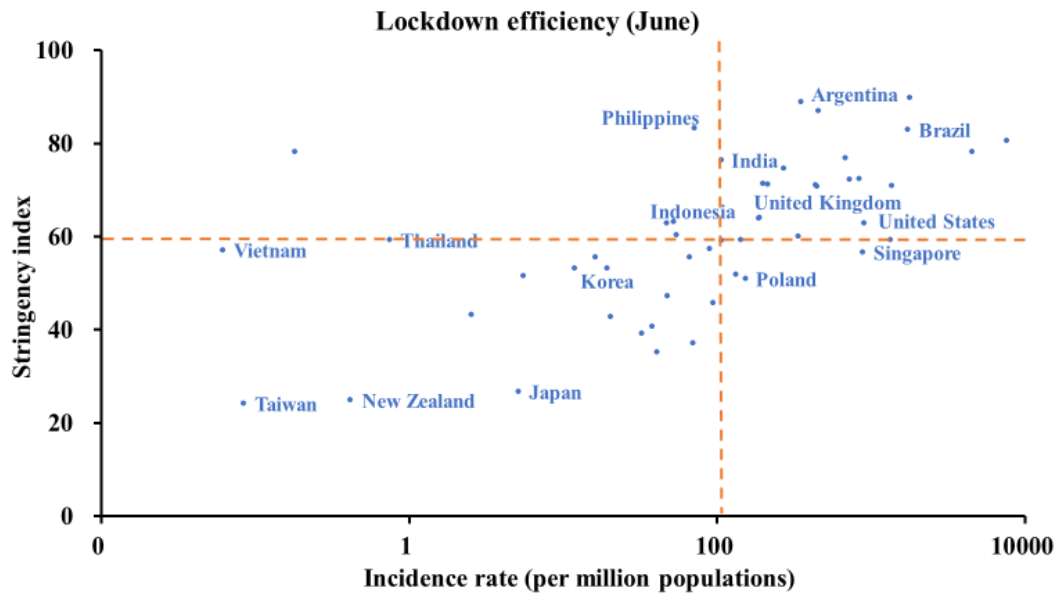

Supplementary Figure S6. Lockdown efficiency in July 2020

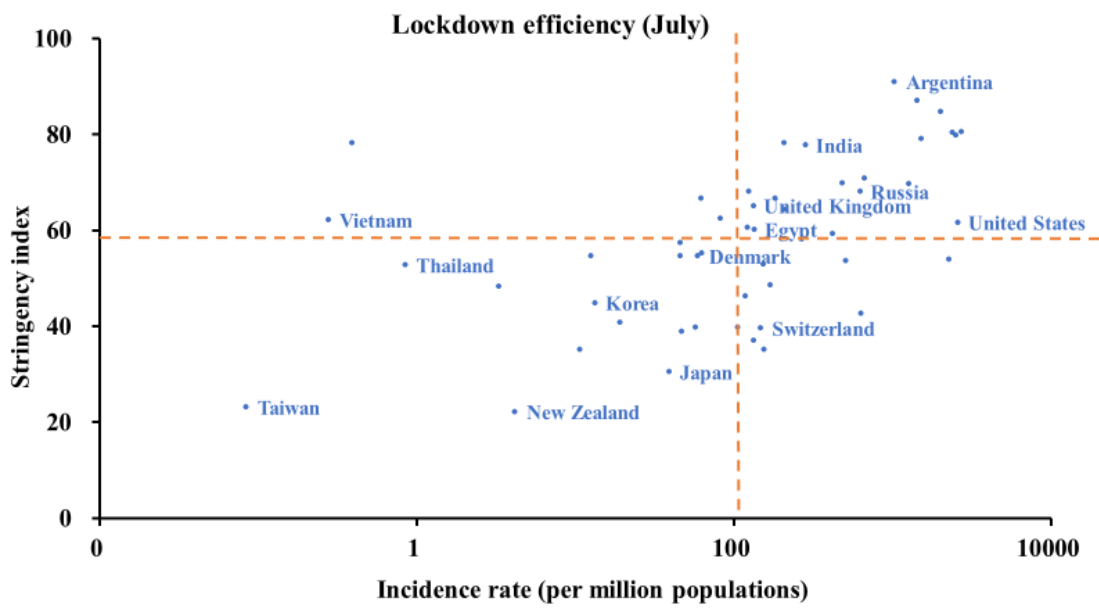

Supplementary Figure S7. Lockdown efficiency in August 2020

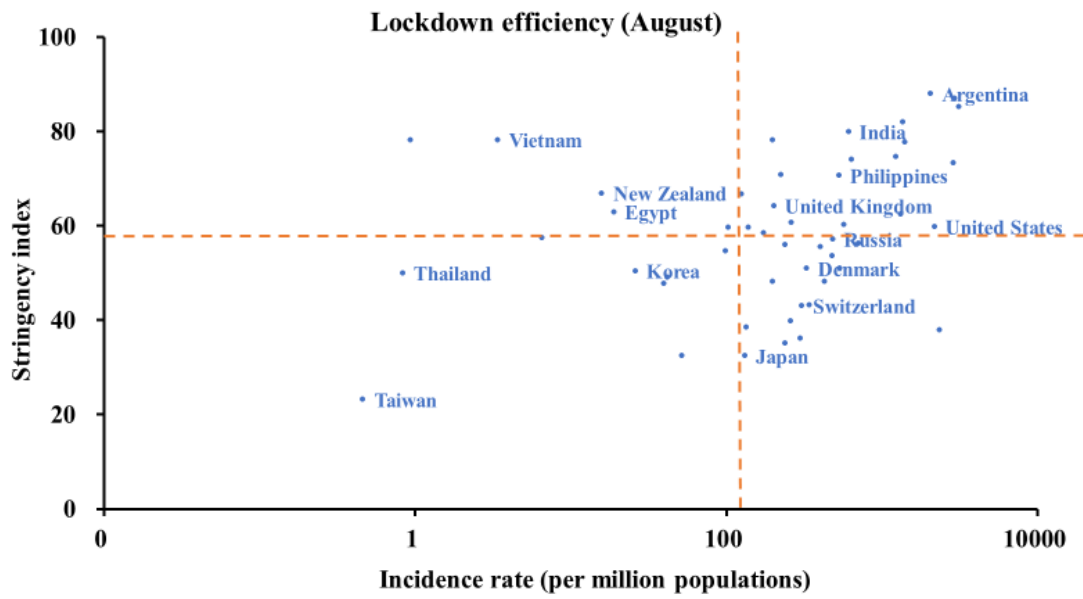

Supplementary Figure S8. Lockdown efficiency in September 2020

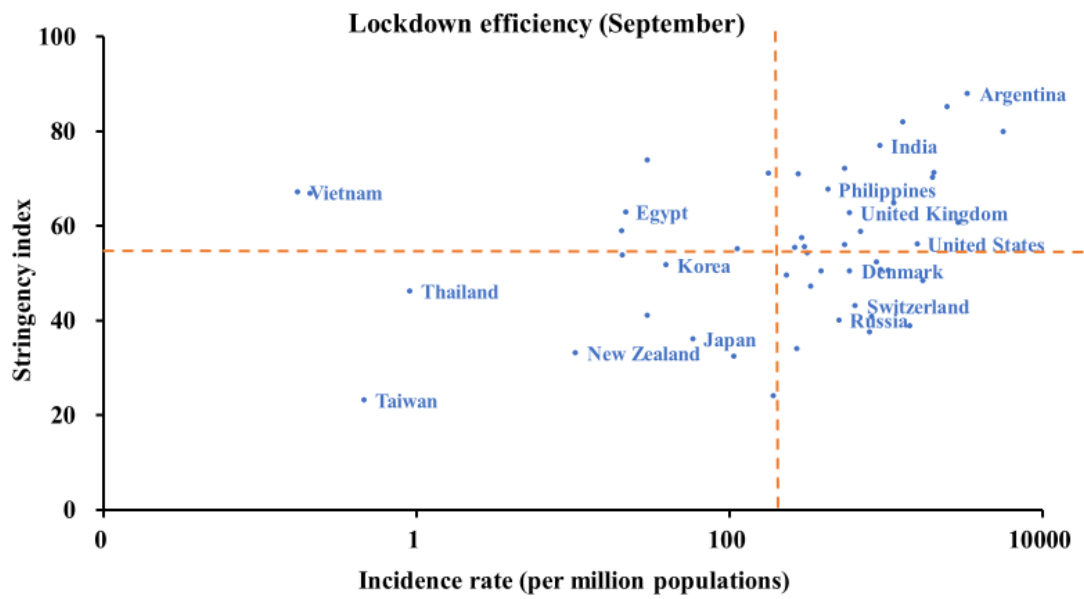

Supplementary Figure S9. Lockdown efficiency in October 2020

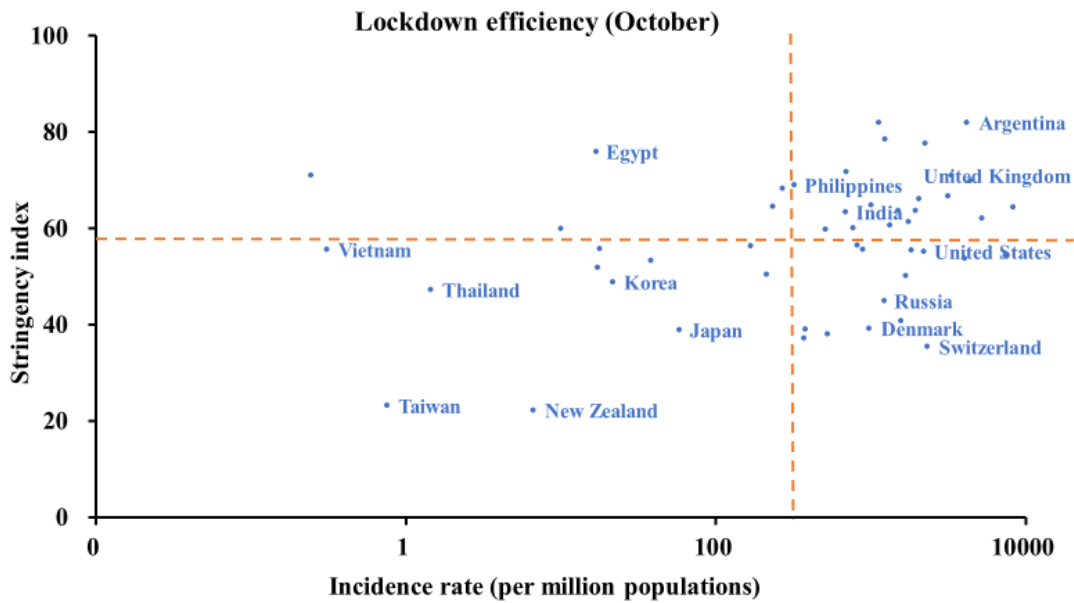

Supplementary Figure S10. Lockdown efficiency in November 2020

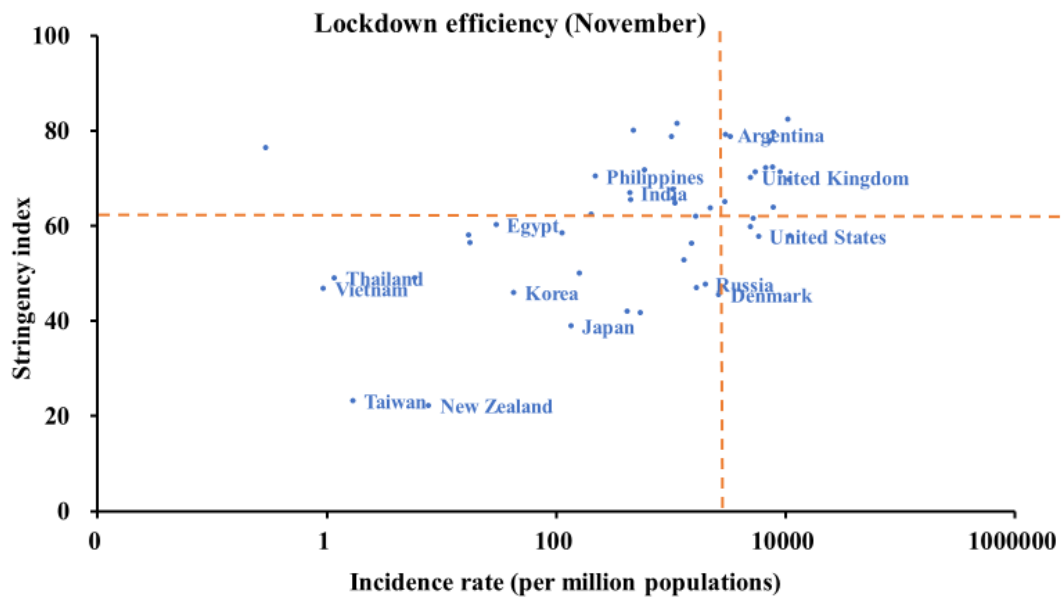

“Lockdown efficiency” is presented as the average stringency index of the last two weeks of the month compared to the two-week total incidence of COVID-19 of the first two weeks of the month. When calculating the incidence rate of COVID-19, we consider both imported and local cases. Since the purpose of enforcing lockdown policy is to suppress the possibility of domestic person-to-person transmission, it is, however, more accurate to consider only COVID-19 local cases when determining

the lockdown efficiency score of each country and region. Similarly, a more accurate lockdown efficiency score can be obtained if the stringency index of each nation and place is calculated by only considering the indicators related to domestic blockade, meaning that the stringency index should be modified by excluding indicator of international travel controls (C8).

However, since the daily number of local cases in each country and region cannot be fully obtained in the public domain, it is not feasible to only consider local infections when calculating the incidence rate. This model limitation might slightly influence the lockdown efficiency score for the 50 nations and places. For example, in Taiwan, as of November 30, 2020, among the 675 COVID-19 cases, 583 cases are imported; 55 cases are local; 36 cases are from the Navy's "Goodwill Fleet"; one case are from undeclared source.<sup>5</sup> Therefore, since approximately 86.37% of the cases are imported, and 8.15% of the cases are local, Taiwan should have lower incidence rate if the determination of lockdown efficiency only considers local infections.

## **Supplementary Information 6. Google Trends**

In our analysis, we utilize Google search trends for "wash hands" and "face mask" as surrogate indicators for health literacy and search queries of "insomnia" as COVID-19's impact on the general population's mental health.<sup>6,7</sup> We confirm the translation of these three terms into the local languages of all countries by using translations from both Chinese and English, with back-translation on Google Translate.

- (1) Health literacy indicators: "wash hands" and "face mask"

Google Trends does not provide information on the absolute numbers of searches for "wash hands" and "face mask". Instead, it provides relative search values (on a scale from 0 to 100) to display search activities for a given term, according to a specific time period and area. Each popularity data point is defined by the total searches within a certain geographical location and time range. A value of 100 is the peak popularity of the term, while a value of 50 means that the term is half as popular in a given time period/area.

- (2) Mental health indicator: insomnia

The use of Google Trends data to investigate the growth of insomnia search queries is based on the study of Lin et al.<sup>7</sup> Insomnia can be used as a surrogate indicator of the impact of the pandemic on global mental health. A significant increase/decrease is defined as when the actual weekly search query (from March 1, 2020, to November 30, 2021) is beyond the 90% CIs of the forecast from the baseline (from January 1, 2019, to January 19, 2020) via ARIMA (autoregressive integrated moving average) modeling. The detailed



description is as follows.

We obtain Google Trends data on “Insomnia” from January 1, 2019, to November 30, 2021, in 45 countries. We examine weekly searches from March 1, 2020, to November 30, 2021, using this period because most countries enforced lockdowns in mid-March of 2020, to compare observed search volumes with expected search volumes from the one-year baseline period between January 1, 2019, and January 19, 2020. This baseline period is based on the fact that on January 20, 2020, the human-to-human transmission aspect of COVID-19 was confirmed by the Chinese authorities. We forecast a counterfactual scenario of the expected search rates had the COVID-19 rapid outbreak and lockdown policies not occurred after January 19, 2020. The expected relative search volumes are estimated using Hyndman and Khandakar’s algorithm for autoregressive integrated moving average (ARIMA) modeling.<sup>8</sup> The historical search rate from January 1, 2019, to January 19, 2020, is compared with the observed search rate from March 1, 2020, to November 30, 2021. For the residuals of each of the chosen models, we verify that they show no significant autocorrelation by a Ljung–Box test. Subsequently, we use weekly trends from January 1, 2019, to January 19, 2020, to forecast the future values with bootstrap CIs, which are computed using R software, version 4.0.3 (R Foundation for Statistical Computing).

We examine the number of weeks with an increase of search volume for insomnia. We define increases in search queries based on both the intensity and the duration of increases in the population of interest, according to previous studies.<sup>6,7</sup> The intensity of a significant increase is defined when the actual daily Google Trends value during March 1, 2020, to November 30, 2021, is higher than the expected by +1.645 standard error (via ARIMA), which is the upper limit of the 95% CI in a one-tailed test. We calculate the number of weeks with a significant increase in searches for insomnia higher than the 95% CI in each country from March 1, 2020, to November 30, 2021.

## Supplementary Information 7. Conversion of the ten indicators on “government policies & hygiene education” and “vital health & socioeconomic” measures

We describe the calculation methods of ten indicators in this section.

(A) For health literacy, people covered by vaccines, vital health indicators (one-month cases per 100,000 members of the population, infection growth rate, one-month case fatality rate), GDP loss, unemployment rate, and insomnia, our calculation method is as follows:

Use a standardized scoring method<sup>9</sup> for the indicators to grade the performance of each country relative to others in the range of 0-100. Two formulas were used to calculate a standardized score of the indicator. For indicators where a larger value indicates better performance, for example, health literacy, people covered by vaccines, and GDP loss, the following formula was used:

$$\text{stdscore}_x = 100 \times \frac{\text{indicator}_{\max} - \text{indicator}_x}{\text{indicator}_{\max} - \text{indicator}_{\min}}$$

where  $\text{indicator}_x$  represents the original data for the country,  $\text{indicator}_{\max}$  and  $\text{indicator}_{\min}$  represent the upper and lower bounds for the data set, and  $\text{stdscore}_x$  represents the computed indicator score for the country.

However, sometimes a lower value for a measure indicates better performance in the underlying data, such as one-month cases per 100,000 members of the population, infection growth rate, one-month case fatality rate, unemployment rate and insomnia. In this case, subtract 100 from the previously calculated formula to obtain the following standardized score:

$$\text{stdscore}_x^{\text{low}} = 100 - \text{stdscore}_x$$

(B) For the index: health-system policies, our calculation method is as follows:

Health-system policies is a measurement index based on five response indicators of OxCGRT<sup>2</sup>, including

H1: Public Information Campaigns (0-2),

H2: Testing Policy (0-3),

H3: Contact tracing (0-2),

H6: Facial coverings (0-4), and

H7: Vaccination policy (0-5).

Each indicator is recorded in the order of 0 to 5 according to the strictness of the representative policy. We calculated Health-system policies as a simple average of the above-mentioned component indicators (vaccination policy is added in December 2020 and later), and rescaled to a value from 0 to 100 (100 = most stringent). The formula is as follows, where  $k$  is the number of component indicators in an index and  $H_j$  is the sub-index score for an individual indicator.

$$\text{Health-system policies} = \frac{1}{k} \sum_{j=1}^k H_j$$

where

| Index name             | k     | H1 | H2 | H3 | H6 | H7* |
|------------------------|-------|----|----|----|----|-----|
| Health-system policies | 4 (5) | x  | x  | x  | x  | x   |

\* vaccination policy is added in December 2020 and later

(C) For the index: lockdown efficiency, our calculation method is as follows:

Lockdown efficiency, as described in Supplementary Information 5, is a new indicator that combines the stringency index of OxCGRT<sup>2</sup> and the incidence of COVID-19. Stringency index is a comprehensive measurement index based on nine response indicators, including

- C1: school closures (0-3),
- C2: workplace closing (0-3),
- C3: cancel public events (0-2),
- C4: restrictions on gatherings (0-4),
- C5: public transportation (0-2),
- C6: stay at home order (0-2),
- C7: restrictions on internal movement (0-2),
- C8: international travel controls (0-4), and
- H1: public information campaigns (0-2).

Each indicator is recorded in the order of 0 to 4 according to the strictness of the representative policy. The most stringent government policy is represented by the highest ordinal value, and rescaled to a value from 0 to 100. According to the Oxford Covid-19 Government Response Tracker<sup>10</sup>, the stringency index is a simple average of the individual component indicators, ranging from 0-100 (100 = strictest). This is described in equation 1 below where  $k$  is the number of component indicators in an index and  $I_j$  is the sub-index score for an individual indicator.

$$(1) \text{ index} = \frac{1}{k} \sum_{j=1}^k I_j$$

where

| Index | k | C1 | C2 | C3 | C4 | C5 | C6 | C7 | C8 | H1 |
|-------|---|----|----|----|----|----|----|----|----|----|
|-------|---|----|----|----|----|----|----|----|----|----|

|                  |   |   |   |   |   |   |   |   |   |   |
|------------------|---|---|---|---|---|---|---|---|---|---|
| name             |   |   |   |   |   |   |   |   |   |   |
| Stringency index | 9 | x | x | x | x | x | x | x | x | x |

According to the method of OxCGRT, lockdown efficiency is recorded in the order of 1 to 4, where 4 is evaluated as the best performance, and the score is rescaled to 0 to 100.

A country's performance score is a simple average of the standardized scores of ten indicators. Then we rank the performance of 50 countries and territories according to the total scores of the indicators. The results were displayed and explained in main text.

We also considered some alternative ways to calculate these indicators. For example, we first divided each indicator into a 1-4 scale based on quartiles; then aggregated all scores with an arithmetic average; and finally rescaled the arithmetic average into a score between 0 and 100. We compared the results with different calculation methods for sensitivity analysis.

## Supplementary Information 8. Overall COVID-19 containment ranking of 50 countries and territories from March 2020 to November 2021

*Supplementary Table S6. Overall COVID-19 containment ranking (with Google Trends)*

| Mar 2020    | R <sup>a</sup> | Apr 2020    | R <sup>a</sup> | May 2020       | R <sup>a</sup> | Jun 2020       | R <sup>a</sup> | Jul 2020    | R <sup>a</sup> | Aug 2020       | R <sup>a</sup> | Sep 2020       | R <sup>a</sup> | Oct 2020     | R <sup>a</sup> | Nov 2020     | R <sup>a</sup> |
|-------------|----------------|-------------|----------------|----------------|----------------|----------------|----------------|-------------|----------------|----------------|----------------|----------------|----------------|--------------|----------------|--------------|----------------|
| Taiwan      | 1              | Japan       | 1              | South Korea    | 1              | Taiwan         | 1              | Malaysia    | 1              | Taiwan         | 1              | Taiwan         | 1              | Taiwan       | 1              | Taiwan       | 1              |
| Thailand    | 2              | Taiwan      | 2              | Taiwan         | 2              | South Korea    | 2              | Netherlands | 2              | Turkey         | 2              | Italy          | 2              | Singapore    | 2              | Australia    | 2              |
| Japan       | 3              | South Korea | 3              | Vietnam        | 3              | Turkey         | 3              | Taiwan      | 3              | Italy          | 3              | Singapore      | 3              | India        | 3              | India        | 3              |
| Qatar       | 4              | Indonesia   | 4              | Germany        | 4              | Vietnam        | 4              | South Korea | 4              | New Zealand    | 4              | New Zealand    | 4              | New Zealand  | 4              | New Zealand  | 4              |
| Russia      | 5              | Australia   | 5              | Czech Republic | 5              | Japan          | 5              | France      | 5              | Finland        | 5              | South Africa   | 5              | Japan        | 5              | South Korea  | 5              |
| Egypt       | 6              | Hong Kong   | 6              | Singapore      | 6              | Australia      | 6              | New Zealand | 6              | South Korea    | 6              | Finland        | 6              | South Korea  | 6              | Japan        | 6              |
| Vietnam     | 7              | Poland      | 7              | Austria        | 7              | Malaysia       | 7              | Thailand    | 7              | Malaysia       | 7              | South Korea    | 7              | Vietnam      | 7              | Vietnam      | 7              |
| Chile       | 8              | Hungary     | 8              | Russia         | 8              | Denmark        | 8              | Germany     | 8              | Germany        | 8              | Germany        | 8              | Canada       | 8              | Egypt        | 8              |
| New Zealand | 9              | Finland     | 9              | Saudi Arabia   | 9              | Russia         | 9              | Finland     | 9              | Thailand       | 9              | Turkey         | 9              | Finland      | 9              | Singapore    | 9              |
| Italy       | 10             | Portugal    | 10             | Hong Kong      | 10             | New Zealand    | 10             | Italy       | 10             | Canada         | 10             | Japan          | 10             | Thailand     | 10             | Turkey       | 10             |
| France      | 11             | Malaysia    | 11             | Australia      | 11             | Czech Republic | 11             | Denmark     | 11             | Poland         | 11             | Poland         | 11             | Italy        | 11             | Saudi Arabia | 11             |
| Mexico      | 12             | Argentina   | 12             | New Zealand    | 12             | Saudi Arabia   | 12             | Poland      | 12             | Denmark        | 12             | Canada         | 12             | Hong Kong    | 12             | Thailand     | 12             |
| Finland     | 13             | New Zealand | 13             | Portugal       | 13             | Canada         | 13             | Turkey      | 13             | United Kingdom | 13             | United Kingdom | 13             | Saudi Arabia | 13             | Hong Kong    | 13             |

|                |                 |                |    |              |    |                |    |                |    |              |    |               |    |                |    |                |    |
|----------------|-----------------|----------------|----|--------------|----|----------------|----|----------------|----|--------------|----|---------------|----|----------------|----|----------------|----|
| Australia      | 14              | Saudi Arabia   | 14 | France       | 14 | Finland        | 14 | United Kingdom | 14 | France       | 14 | Russia        | 14 | Denmark        | 14 | South Africa   | 14 |
| Brazil         | 15              | Italy          | 15 | Poland       | 15 | Hong Kong      | 15 | Japan          | 15 | South Africa | 15 | Brazil        | 15 | Turkey         | 15 | Chile          | 15 |
| Canada         | 16              | South Africa   | 16 | Egypt        | 16 | Portugal       | 16 | Czech Republic | 16 | Hungary      | 16 | Malaysia      | 16 | Netherlands    | 16 | Germany        | 16 |
| India          | 17              | Czech Republic | 17 | Japan        | 17 | Austria        | 17 | Canada         | 17 | Saudi Arabia | 17 | Thailand      | 17 | South Africa   | 17 | Brazil         | 17 |
| Hong Kong      | 18              | Vietnam        | 18 | Malaysia     | 18 | France         | 18 | Russia         | 18 | Singapore    | 18 | Mexico        | 18 | Portugal       | 18 | Finland        | 18 |
| Netherlands    | 19              | Germany        | 19 | Indonesia    | 19 | Indonesia      | 19 | Spain          | 19 | Austria      | 19 | India         | 19 | Chile          | 19 | Argentina      | 19 |
| South Korea    | 20              | Austria        | 20 | Finland      | 20 | Italy          | 20 | Hungary        | 20 | Japan        | 20 | Netherlands   | 20 | Germany        | 20 | Russia         | 20 |
| Malaysia       | 21              | France         | 21 | South Africa | 21 | Germany        | 21 | Vietnam        | 21 | Sweden       | 21 | Portugal      | 21 | Australia      | 21 | Sweden         | 21 |
| United Kingdom | 22              | Netherlands    | 22 | Turkey       | 22 | South Africa   | 22 | Portugal       | 22 | Portugal     | 22 | Saudi Arabia  | 22 | Brazil         | 22 | Peru           | 22 |
| Denmark        | 23              | Egypt          | 23 | Italy        | 23 | Egypt          | 23 | Australia      | 23 | Russia       | 23 | France        | 23 | Russia         | 23 | Malaysia       | 23 |
| Sweden         | 24              | Russia         | 24 | Denmark      | 24 | United States  | 24 | Egypt          | 24 | Australia    | 24 | Vietnam       | 24 | Sweden         | 24 | Canada         | 24 |
| Germany        | 25              | Turkey         | 25 | Sweden       | 25 | Netherlands    | 25 | Sweden         | 25 | Egypt        | 25 | Sweden        | 25 | Malaysia       | 25 | France         | 25 |
| United States  | 26              | Chile          | 26 | Canada       | 26 | United Kingdom | 26 | Saudi Arabia   | 26 | Netherlands  | 26 | Denmark       | 26 | United Kingdom | 26 | Colombia       | 26 |
| Singapore      | 27              | Denmark        | 27 | Hungary      | 27 | Poland         | 27 | Austria        | 27 | Hong Kong    | 27 | Austria       | 27 | Austria        | 27 | United Kingdom | 27 |
| Austria        | 28              | Colombia       | 28 | Colombia     | 28 | India          | 28 | India          | 28 | Brazil       | 28 | Spain         | 28 | Argentina      | 28 | Denmark        | 28 |
| Spain          | 29              | Qatar          | 29 | Argentina    | 29 | Singapore      | 29 | Hong Kong      | 29 | Spain        | 29 | Hong Kong     | 29 | Peru           | 29 | Mexico         | 29 |
| Argentina      | NA <sup>b</sup> | Singapore      | 30 | Netherlands  | 30 | Spain          | 30 | Singapore      | 30 | India        | 30 | United States | 30 | Egypt          | 30 | Spain          | 30 |
| Belgium        | NA <sup>b</sup> | Sweden         | 31 | Qatar        | 31 | Colombia       | 31 | Brazil         | 31 | Chile        | 31 | Chile         | 31 | France         | 31 | Netherlands    | 31 |

|                |                 |                |                 |                |                 |             |                 |               |                 |                |                 |                |                 |                |                 |                |                 |
|----------------|-----------------|----------------|-----------------|----------------|-----------------|-------------|-----------------|---------------|-----------------|----------------|-----------------|----------------|-----------------|----------------|-----------------|----------------|-----------------|
| China          | NA <sup>b</sup> | Canada         | 32              | Brazil         | 32              | Qatar       | 32              | Argentina     | 32              | Czech Republic | 32              | Egypt          | 32              | Colombia       | 32              | Italy          | 32              |
| Colombia       | NA <sup>b</sup> | Peru           | 33              | United Kingdom | 33              | Chile       | 33              | South Africa  | 33              | United States  | 33              | Argentina      | 33              | Spain          | 33              | United States  | 33              |
| Czech Republic | NA <sup>b</sup> | Mexico         | 34              | United States  | 34              | Sweden      | 34              | Chile         | 34              | Mexico         | 34              | Peru           | 34              | Mexico         | 34              | Portugal       | 34              |
| Greece         | NA <sup>b</sup> | India          | 35              | Spain          | 35              | Brazil      | 35              | United States | 35              | Argentina      | 35              | Australia      | 35              | United States  | 35              | Austria        | 35              |
| Hungary        | NA <sup>b</sup> | Brazil         | 36              | Peru           | 36              | Argentina   | 36              | Mexico        | 36              | Vietnam        | 36              | Colombia       | 36              | Poland         | 36              | Czech Republic | 36              |
| Indonesia      | NA <sup>b</sup> | United Kingdom | 37              | India          | 37              | Peru        | 37              | Colombia      | 37              | Colombia       | 37              | Czech Republic | 37              | Hungary        | 37              | Hungary        | 37              |
| Ireland        | NA <sup>b</sup> | Spain          | 38              | Chile          | 38              | Hungary     | 38              | Peru          | 38              | Peru           | 38              | Hungary        | 38              | Czech Republic | 38              | Poland         | 38              |
| Israel         | NA <sup>b</sup> | United States  | 39              | Mexico         | 39              | Mexico      | 39              | Belgium       | NA <sup>b</sup> | Belgium        | NA <sup>b</sup> | Belgium        | NA <sup>b</sup> | Belgium        | NA <sup>b</sup> | Belgium        | NA <sup>b</sup> |
| Norway         | NA <sup>b</sup> | Belgium        | NA <sup>b</sup> | Belgium        | NA <sup>b</sup> | Belgium     | NA <sup>b</sup> | China         | NA <sup>b</sup> | China          | NA <sup>b</sup> | China          | NA <sup>b</sup> | China          | NA <sup>b</sup> | China          | NA <sup>b</sup> |
| Pakistan       | NA <sup>b</sup> | China          | NA <sup>b</sup> | China          | NA <sup>b</sup> | China       | NA <sup>b</sup> | Greece        | NA <sup>b</sup> | Greece         | NA <sup>b</sup> | Greece         | NA <sup>b</sup> | Greece         | NA <sup>b</sup> | Greece         | NA <sup>b</sup> |
| Peru           | NA <sup>b</sup> | Greece         | NA <sup>b</sup> | Greece         | NA <sup>b</sup> | Greece      | NA <sup>b</sup> | Indonesia     | NA <sup>b</sup> | Indonesia      | NA <sup>b</sup> | Indonesia      | NA <sup>b</sup> | Indonesia      | NA <sup>b</sup> | Indonesia      | NA <sup>b</sup> |
| Philippines    | NA <sup>b</sup> | Ireland        | NA <sup>b</sup> | Ireland        | NA <sup>b</sup> | Ireland     | NA <sup>b</sup> | Ireland       | NA <sup>b</sup> | Ireland        | NA <sup>b</sup> | Ireland        | NA <sup>b</sup> | Ireland        | NA <sup>b</sup> | Ireland        | NA <sup>b</sup> |
| Poland         | NA <sup>b</sup> | Israel         | NA <sup>b</sup> | Israel         | NA <sup>b</sup> | Israel      | NA <sup>b</sup> | Israel        | NA <sup>b</sup> | Israel         | NA <sup>b</sup> | Israel         | NA <sup>b</sup> | Israel         | NA <sup>b</sup> | Israel         | NA <sup>b</sup> |
| Portugal       | NA <sup>b</sup> | Norway         | NA <sup>b</sup> | Norway         | NA <sup>b</sup> | Norway      | NA <sup>b</sup> | Norway        | NA <sup>b</sup> | Norway         | NA <sup>b</sup> | Norway         | NA <sup>b</sup> | Norway         | NA <sup>b</sup> | Norway         | NA <sup>b</sup> |
| Saudi Arabia   | NA <sup>b</sup> | Pakistan       | NA <sup>b</sup> | Pakistan       | NA <sup>b</sup> | Pakistan    | NA <sup>b</sup> | Pakistan      | NA <sup>b</sup> | Pakistan       | NA <sup>b</sup> | Pakistan       | NA <sup>b</sup> | Pakistan       | NA <sup>b</sup> | Pakistan       | NA <sup>b</sup> |
| South Africa   | NA <sup>b</sup> | Philippines    | NA <sup>b</sup> | Philippines    | NA <sup>b</sup> | Philippines | NA <sup>b</sup> | Philippines   | NA <sup>b</sup> | Philippines    | NA <sup>b</sup> | Philippines    | NA <sup>b</sup> | Philippines    | NA <sup>b</sup> | Philippines    | NA <sup>b</sup> |
| Switzerland    | NA <sup>b</sup> | Switzerland    | NA <sup>b</sup> | Switzerland    | NA <sup>b</sup> | Switzerland | NA <sup>b</sup> | Qatar         | NA <sup>b</sup> | Qatar          | NA <sup>b</sup> | Qatar          | NA <sup>b</sup> | Qatar          | NA <sup>b</sup> | Qatar          | NA <sup>b</sup> |

|                      |                 |                      |                 |                      |                 |                      |                 |                      |                 |                      |                 |                      |                 |                      |                 |
|----------------------|-----------------|----------------------|-----------------|----------------------|-----------------|----------------------|-----------------|----------------------|-----------------|----------------------|-----------------|----------------------|-----------------|----------------------|-----------------|
| Turkey               | NA <sup>b</sup> | Thailand             | NA <sup>b</sup> | Thailand             | NA <sup>b</sup> | Thailand             | NA <sup>b</sup> | Switzerland          | NA <sup>b</sup> | Switzerland          | NA <sup>b</sup> | Switzerland          | NA <sup>b</sup> | Switzerland          | NA <sup>b</sup> |
| United Arab Emirates | NA <sup>b</sup> | United Arab Emirates | NA <sup>b</sup> | United Arab Emirates | NA <sup>b</sup> | United Arab Emirates | NA <sup>b</sup> | United Arab Emirates | NA <sup>b</sup> | United Arab Emirates | NA <sup>b</sup> | United Arab Emirates | NA <sup>b</sup> | United Arab Emirates | NA <sup>b</sup> |

Notes:

a. R means each country's ranking.

b. NA: not applicable. Indicates a country not ranked due to incomplete data.



| <b>Dec 2020</b> | <b>R<sup>a</sup></b> | <b>Jan 2021</b> | <b>R<sup>a</sup></b> | <b>Feb 2021</b> | <b>R<sup>a</sup></b> | <b>Mar 2021</b> | <b>R<sup>a</sup></b> | <b>Apr 2021</b> | <b>R<sup>a</sup></b> | <b>May 2021</b> | <b>R<sup>a</sup></b> | <b>Jun 2021</b> | <b>R<sup>a</sup></b> |
|-----------------|----------------------|-----------------|----------------------|-----------------|----------------------|-----------------|----------------------|-----------------|----------------------|-----------------|----------------------|-----------------|----------------------|
| Taiwan          | 1                    | Taiwan          | 1                    | Singapore       | 1                    | Singapore       | 1                    | United Kingdom  | 1                    | Singapore       | 1                    | Singapore       | 1                    |
| Finland         | 2                    | Singapore       | 2                    | Taiwan          | 2                    | South Korea     | 2                    | Singapore       | 2                    | United Kingdom  | 2                    | Czech Republic  | 2                    |
| Chile           | 3                    | Saudi Arabia    | 3                    | India           | 3                    | Taiwan          | 3                    | Malaysia        | 3                    | Austria         | 3                    | Spain           | 3                    |
| Argentina       | 4                    | Russia          | 4                    | Saudi Arabia    | 4                    | Saudi Arabia    | 4                    | Russia          | 4                    | Spain           | 4                    | France          | 4                    |
| Germany         | 5                    | Egypt           | 5                    | Australia       | 5                    | Australia       | 5                    | Italy           | 5                    | Italy           | 5                    | Austria         | 5                    |
| Sweden          | 6                    | Italy           | 6                    | Italy           | 6                    | Egypt           | 6                    | Germany         | 6                    | United States   | 6                    | United Kingdom  | 6                    |
| Poland          | 7                    | Indonesia       | 7                    | Denmark         | 7                    | New Zealand     | 7                    | Spain           | 7                    | Russia          | 7                    | Italy           | 7                    |
| Russia          | 8                    | Austria         | 8                    | New Zealand     | 8                    | Russia          | 8                    | Portugal        | 8                    | Portugal        | 8                    | Portugal        | 8                    |
| Canada          | 9                    | Argentina       | 9                    | Canada          | 9                    | Canada          | 9                    | Austria         | 9                    | Malaysia        | 9                    | United States   | 9                    |
| United Kingdom  | 10                   | India           | 10                   | Argentina       | 10                   | Hong Kong       | 10                   | South Korea     | 10                   | South Korea     | 10                   | South Korea     | 10                   |
| Austria         | 11                   | Sweden          | 11                   | South Korea     | 11                   | Vietnam         | 11                   | Japan           | 11                   | Germany         | 11                   | Sweden          | 11                   |
| Portugal        | 12                   | Germany         | 12                   | Japan           | 12                   | Thailand        | 12                   | Taiwan          | 12                   | Mexico          | 12                   | Mexico          | 12                   |
| France          | 13                   | Turkey          | 13                   | Netherlands     | 13                   | Argentina       | 13                   | United States   | 13                   | France          | 13                   | Germany         | 13                   |
| Mexico          | 14                   | France          | 14                   | Poland          | 14                   | India           | 14                   | France          | 14                   | Hong Kong       | 14                   | Japan           | 14                   |
| Italy           | 15                   | Netherlands     | 15                   | Sweden          | 15                   | Austria         | 15                   | Vietnam         | 15                   | Japan           | 15                   | Russia          | 15                   |
| Denmark         | 16                   | Finland         | 16                   | Turkey          | 16                   | Malaysia        | 16                   | Hong Kong       | 16                   | Sweden          | 16                   | Poland          | 16                   |
| Hungary         | 17                   | Denmark         | 17                   | Hong Kong       | 17                   | Japan           | 17                   | Mexico          | 17                   | Poland          | 17                   | Malaysia        | 17                   |
| Czech Republic  | 18                   | Poland          | 18                   | United Kingdom  | 18                   | United Kingdom  | 18                   | Poland          | 18                   | Taiwan          | 18                   | Hong Kong       | 18                   |
| United States   | 19                   | Hungary         | 19                   | Finland         | 19                   | Germany         | 19                   | Czech Republic  | 19                   | Czech Republic  | 19                   | Taiwan          | 19                   |
| Australia       | NA <sup>b</sup>      | Chile           | 20                   | Austria         | 20                   | Portugal        | 20                   | Sweden          | 20                   | Vietnam         | 20                   | Vietnam         | 20                   |
| Belgium         | NA <sup>b</sup>      | Spain           | 21                   | Germany         | 21                   | Italy           | 21                   | Argentina       | NA <sup>b</sup>      | Argentina       | NA <sup>b</sup>      | Argentina       | NA <sup>b</sup>      |

|              |                 |                |                 |                |                 |                |                 |             |                 |             |                 |             |                 |
|--------------|-----------------|----------------|-----------------|----------------|-----------------|----------------|-----------------|-------------|-----------------|-------------|-----------------|-------------|-----------------|
| Brazil       | NA <sup>b</sup> | Brazil         | 22              | Thailand       | 22              | Indonesia      | 22              | Australia   | NA <sup>b</sup> | Australia   | NA <sup>b</sup> | Australia   | NA <sup>b</sup> |
| China        | NA <sup>b</sup> | Portugal       | 23              | Mexico         | 23              | Turkey         | 23              | Belgium     | NA <sup>b</sup> | Belgium     | NA <sup>b</sup> | Belgium     | NA <sup>b</sup> |
| Colombia     | NA <sup>b</sup> | United Kingdom | 24              | Chile          | 24              | France         | 24              | Brazil      | NA <sup>b</sup> | Brazil      | NA <sup>b</sup> | Brazil      | NA <sup>b</sup> |
| Egypt        | NA <sup>b</sup> | Mexico         | 25              | Malaysia       | 25              | South Africa   | 25              | Canada      | NA <sup>b</sup> | Canada      | NA <sup>b</sup> | Canada      | NA <sup>b</sup> |
| Greece       | NA <sup>b</sup> | Canada         | 26              | Portugal       | 26              | Netherlands    | 26              | Chile       | NA <sup>b</sup> | Chile       | NA <sup>b</sup> | Chile       | NA <sup>b</sup> |
| Hong Kong    | NA <sup>b</sup> | Czech Republic | 27              | France         | 27              | Chile          | 27              | China       | NA <sup>b</sup> | China       | NA <sup>b</sup> | China       | NA <sup>b</sup> |
| India        | NA <sup>b</sup> | United States  | 28              | Indonesia      | 28              | Sweden         | 28              | Colombia    | NA <sup>b</sup> | Colombia    | NA <sup>b</sup> | Colombia    | NA <sup>b</sup> |
| Indonesia    | NA <sup>b</sup> | Australia      | NA <sup>b</sup> | South Africa   | 29              | Denmark        | 29              | Denmark     | NA <sup>b</sup> | Denmark     | NA <sup>b</sup> | Denmark     | NA <sup>b</sup> |
| Ireland      | NA <sup>b</sup> | Belgium        | NA <sup>b</sup> | Spain          | 30              | Colombia       | 30              | Egypt       | NA <sup>b</sup> | Egypt       | NA <sup>b</sup> | Egypt       | NA <sup>b</sup> |
| Israel       | NA <sup>b</sup> | China          | NA <sup>b</sup> | Hungary        | 31              | Spain          | 31              | Finland     | NA <sup>b</sup> | Finland     | NA <sup>b</sup> | Finland     | NA <sup>b</sup> |
| Japan        | NA <sup>b</sup> | Colombia       | NA <sup>b</sup> | Colombia       | 32              | United States  | 32              | Greece      | NA <sup>b</sup> | Greece      | NA <sup>b</sup> | Greece      | NA <sup>b</sup> |
| Malaysia     | NA <sup>b</sup> | Greece         | NA <sup>b</sup> | Brazil         | 33              | Mexico         | 33              | Hungary     | NA <sup>b</sup> | Hungary     | NA <sup>b</sup> | Hungary     | NA <sup>b</sup> |
| Netherlands  | NA <sup>b</sup> | Hong Kong      | NA <sup>b</sup> | United States  | 34              | Peru           | 34              | India       | NA <sup>b</sup> | India       | NA <sup>b</sup> | India       | NA <sup>b</sup> |
| New Zealand  | NA <sup>b</sup> | Ireland        | NA <sup>b</sup> | Peru           | 35              | Brazil         | 35              | Indonesia   | NA <sup>b</sup> | Indonesia   | NA <sup>b</sup> | Indonesia   | NA <sup>b</sup> |
| Norway       | NA <sup>b</sup> | Israel         | NA <sup>b</sup> | Czech Republic | 36              | Poland         | 36              | Ireland     | NA <sup>b</sup> | Ireland     | NA <sup>b</sup> | Ireland     | NA <sup>b</sup> |
| Pakistan     | NA <sup>b</sup> | Japan          | NA <sup>b</sup> | Belgium        | NA <sup>b</sup> | Finland        | 37              | Israel      | NA <sup>b</sup> | Israel      | NA <sup>b</sup> | Israel      | NA <sup>b</sup> |
| Peru         | NA <sup>b</sup> | Malaysia       | NA <sup>b</sup> | China          | NA <sup>b</sup> | Czech Republic | 38              | Netherlands | NA <sup>b</sup> | Netherlands | NA <sup>b</sup> | Netherlands | NA <sup>b</sup> |
| Philippines  | NA <sup>b</sup> | New Zealand    | NA <sup>b</sup> | Egypt          | NA <sup>b</sup> | Hungary        | 39              | New Zealand | NA <sup>b</sup> | New Zealand | NA <sup>b</sup> | New Zealand | NA <sup>b</sup> |
| Qatar        | NA <sup>b</sup> | Norway         | NA <sup>b</sup> | Greece         | NA <sup>b</sup> | Belgium        | NA <sup>b</sup> | Norway      | NA <sup>b</sup> | Norway      | NA <sup>b</sup> | Norway      | NA <sup>b</sup> |
| Saudi Arabia | NA <sup>b</sup> | Pakistan       | NA <sup>b</sup> | Ireland        | NA <sup>b</sup> | China          | NA <sup>b</sup> | Pakistan    | NA <sup>b</sup> | Pakistan    | NA <sup>b</sup> | Pakistan    | NA <sup>b</sup> |
| Singapore    | NA <sup>b</sup> | Peru           | NA <sup>b</sup> | Israel         | NA <sup>b</sup> | Greece         | NA <sup>b</sup> | Peru        | NA <sup>b</sup> | Peru        | NA <sup>b</sup> | Peru        | NA <sup>b</sup> |
| South Africa | NA <sup>b</sup> | Philippines    | NA <sup>b</sup> | Norway         | NA <sup>b</sup> | Ireland        | NA <sup>b</sup> | Philippines | NA <sup>b</sup> | Philippines | NA <sup>b</sup> | Philippines | NA <sup>b</sup> |
| South Korea  | NA <sup>b</sup> | Qatar          | NA <sup>b</sup> | Pakistan       | NA <sup>b</sup> | Israel         | NA <sup>b</sup> | Qatar       | NA <sup>b</sup> | Qatar       | NA <sup>b</sup> | Qatar       | NA <sup>b</sup> |

|                      |                 |                      |                 |                      |                 |                      |                 |                      |                 |                      |                 |                      |                 |
|----------------------|-----------------|----------------------|-----------------|----------------------|-----------------|----------------------|-----------------|----------------------|-----------------|----------------------|-----------------|----------------------|-----------------|
| Spain                | NA <sup>b</sup> | South Africa         | NA <sup>b</sup> | Philippines          | NA <sup>b</sup> | Norway               | NA <sup>b</sup> | Saudi Arabia         | NA <sup>b</sup> | Saudi Arabia         | NA <sup>b</sup> | Saudi Arabia         | NA <sup>b</sup> |
| Switzerland          | NA <sup>b</sup> | South Korea          | NA <sup>b</sup> | Qatar                | NA <sup>b</sup> | Pakistan             | NA <sup>b</sup> | South Africa         | NA <sup>b</sup> | South Africa         | NA <sup>b</sup> | South Africa         | NA <sup>b</sup> |
| Thailand             | NA <sup>b</sup> | Switzerland          | NA <sup>b</sup> | Russia               | NA <sup>b</sup> | Philippines          | NA <sup>b</sup> | Switzerland          | NA <sup>b</sup> | Switzerland          | NA <sup>b</sup> | Switzerland          | NA <sup>b</sup> |
| Turkey               | NA <sup>b</sup> | Thailand             | NA <sup>b</sup> | Switzerland          | NA <sup>b</sup> | Qatar                | NA <sup>b</sup> | Thailand             | NA <sup>b</sup> | Thailand             | NA <sup>b</sup> | Thailand             | NA <sup>b</sup> |
| United Arab Emirates | NA <sup>b</sup> | United Arab Emirates | NA <sup>b</sup> | United Arab Emirates | NA <sup>b</sup> | Switzerland          | NA <sup>b</sup> | Turkey               | NA <sup>b</sup> | Turkey               | NA <sup>b</sup> | Turkey               | NA <sup>b</sup> |
| Vietnam              | NA <sup>b</sup> | Vietnam              | NA <sup>b</sup> | Vietnam              | NA <sup>b</sup> | United Arab Emirates | NA <sup>b</sup> | United Arab Emirates | NA <sup>b</sup> | United Arab Emirates | NA <sup>b</sup> | United Arab Emirates | NA <sup>b</sup> |

Notes:

a. R means each country's ranking.

b. NA: not applicable. Indicates a country not ranked due to incomplete data.

| <b>Jul 2021</b> | <b>R<sup>a</sup></b> | <b>Aug 2021</b> | <b>R<sup>a</sup></b> | <b>Sep 2021</b> | <b>R<sup>a</sup></b> | <b>Oct 2021</b> | <b>R<sup>a</sup></b> | <b>Nov 2021</b> | <b>R<sup>a</sup></b> |
|-----------------|----------------------|-----------------|----------------------|-----------------|----------------------|-----------------|----------------------|-----------------|----------------------|
| Singapore       | 1                    | Singapore       | 1                    | Colombia        | 1                    | Chile           | 1                    | Italy           | 1                    |
| Canada          | 2                    | Canada          | 2                    | Chile           | 2                    | Peru            | 2                    | Taiwan          | 2                    |
| Chile           | 3                    | Peru            | 3                    | Japan           | 3                    | Canada          | 3                    | Malaysia        | 3                    |
| Peru            | 4                    | Saudi Arabia    | 4                    | Peru            | 4                    | Italy           | 4                    | Chile           | 4                    |
| Japan           | 5                    | Chile           | 5                    | South Korea     | 5                    | Malaysia        | 5                    | South Korea     | 5                    |
| Hungary         | 6                    | Colombia        | 6                    | Poland          | 6                    | Brazil          | 6                    | Peru            | 6                    |
| Italy           | 7                    | Czech Republic  | 7                    | Czech Republic  | 7                    | Taiwan          | 7                    | Japan           | 7                    |
| Austria         | 8                    | Argentina       | 8                    | Russia          | 8                    | Sweden          | 8                    | Mexico          | 8                    |
| Saudi Arabia    | 9                    | Italy           | 9                    | Spain           | 9                    | Hong Kong       | 9                    | Sweden          | 9                    |
| Sweden          | 10                   | Poland          | 10                   | Portugal        | 10                   | Colombia        | 10                   | Canada          | 10                   |
| South Korea     | 11                   | Hungary         | 11                   | Italy           | 11                   | South Korea     | 11                   | Colombia        | 11                   |
| New Zealand     | 12                   | South Korea     | 12                   | Denmark         | 12                   | Poland          | 12                   | Australia       | 12                   |
| Australia       | 13                   | Australia       | 13                   | Taiwan          | 13                   | Mexico          | 13                   | Hong Kong       | 13                   |
| Colombia        | 14                   | Sweden          | 14                   | Canada          | 14                   | Austria         | 14                   | Russia          | 14                   |
| Poland          | 15                   | Portugal        | 15                   | France          | 15                   | Japan           | 15                   | Germany         | 15                   |
| Czech Republic  | 16                   | Netherlands     | 16                   | New Zealand     | 16                   | Russia          | 16                   | Netherlands     | 16                   |
| Netherlands     | 17                   | Austria         | 17                   | Hungary         | 17                   | Turkey          | 17                   | Finland         | 17                   |
| Germany         | 18                   | New Zealand     | 18                   | Austria         | 18                   | Australia       | 18                   | United States   | 18                   |
| United States   | 19                   | Japan           | 19                   | India           | 19                   | Denmark         | 19                   | Poland          | 19                   |
| Hong Kong       | 20                   | France          | 20                   | Singapore       | 20                   | Finland         | 20                   | Austria         | 20                   |
| India           | 21                   | Hong Kong       | 21                   | Hong Kong       | 21                   | Netherlands     | 21                   | Hungary         | 21                   |

|                |                 |                |                 |                |                 |                |                 |                |                 |
|----------------|-----------------|----------------|-----------------|----------------|-----------------|----------------|-----------------|----------------|-----------------|
| Argentina      | 22              | Germany        | 22              | Germany        | 22              | Hungary        | 22              | Czech Republic | 22              |
| Portugal       | 23              | Spain          | 23              | Argentina      | 23              | Germany        | 23              | Argentina      | NA <sup>b</sup> |
| Mexico         | 24              | Russia         | 24              | Brazil         | 24              | Czech Republic | 24              | Belgium        | NA <sup>b</sup> |
| France         | 25              | Denmark        | 25              | Saudi Arabia   | 25              | United Kingdom | 25              | Brazil         | NA <sup>b</sup> |
| Spain          | 26              | Mexico         | 26              | Netherlands    | 26              | United States  | 26              | China          | NA <sup>b</sup> |
| Russia         | 27              | United Kingdom | 27              | Turkey         | 27              | Argentina      | NA <sup>b</sup> | Denmark        | NA <sup>b</sup> |
| Denmark        | 28              | Brazil         | 28              | United Kingdom | 28              | Belgium        | NA <sup>b</sup> | Egypt          | NA <sup>b</sup> |
| Finland        | 29              | India          | 29              | Sweden         | 29              | China          | NA <sup>b</sup> | France         | NA <sup>b</sup> |
| United Kingdom | 30              | Finland        | 30              | Malaysia       | 30              | Egypt          | NA <sup>b</sup> | Greece         | NA <sup>b</sup> |
| Thailand       | 31              | Turkey         | 31              | Finland        | 31              | France         | NA <sup>b</sup> | India          | NA <sup>b</sup> |
| Malaysia       | 32              | United States  | 32              | Australia      | 32              | Greece         | NA <sup>b</sup> | Indonesia      | NA <sup>b</sup> |
| Turkey         | 33              | South Africa   | 33              | Mexico         | 33              | India          | NA <sup>b</sup> | Ireland        | NA <sup>b</sup> |
| Brazil         | 34              | Taiwan         | 34              | United States  | 34              | Indonesia      | NA <sup>b</sup> | Israel         | NA <sup>b</sup> |
| Taiwan         | 35              | Thailand       | 35              | Thailand       | 35              | Ireland        | NA <sup>b</sup> | New Zealand    | NA <sup>b</sup> |
| South Africa   | 36              | Malaysia       | 36              | South Africa   | 36              | Israel         | NA <sup>b</sup> | Norway         | NA <sup>b</sup> |
| Vietnam        | 37              | Vietnam        | 37              | Vietnam        | 37              | New Zealand    | NA <sup>b</sup> | Pakistan       | NA <sup>b</sup> |
| Belgium        | NA <sup>b</sup> | Belgium        | NA <sup>b</sup> | Belgium        | NA <sup>b</sup> | Norway         | NA <sup>b</sup> | Philippines    | NA <sup>b</sup> |
| China          | NA <sup>b</sup> | China          | NA <sup>b</sup> | China          | NA <sup>b</sup> | Pakistan       | NA <sup>b</sup> | Portugal       | NA <sup>b</sup> |
| Egypt          | NA <sup>b</sup> | Egypt          | NA <sup>b</sup> | Egypt          | NA <sup>b</sup> | Philippines    | NA <sup>b</sup> | Qatar          | NA <sup>b</sup> |
| Greece         | NA <sup>b</sup> | Greece         | NA <sup>b</sup> | Greece         | NA <sup>b</sup> | Portugal       | NA <sup>b</sup> | Saudi Arabia   | NA <sup>b</sup> |
| Indonesia      | NA <sup>b</sup> | Indonesia      | NA <sup>b</sup> | Indonesia      | NA <sup>b</sup> | Qatar          | NA <sup>b</sup> | Singapore      | NA <sup>b</sup> |
| Ireland        | NA <sup>b</sup> | Ireland        | NA <sup>b</sup> | Ireland        | NA <sup>b</sup> | Saudi Arabia   | NA <sup>b</sup> | South Africa   | NA <sup>b</sup> |
| Israel         | NA <sup>b</sup> | Israel         | NA <sup>b</sup> | Israel         | NA <sup>b</sup> | Singapore      | NA <sup>b</sup> | Spain          | NA <sup>b</sup> |

|                      |                 |                      |                 |                      |                 |                      |                 |                      |                 |
|----------------------|-----------------|----------------------|-----------------|----------------------|-----------------|----------------------|-----------------|----------------------|-----------------|
| Norway               | NA <sup>b</sup> | Norway               | NA <sup>b</sup> | Norway               | NA <sup>b</sup> | South Africa         | NA <sup>b</sup> | Switzerland          | NA <sup>b</sup> |
| Pakistan             | NA <sup>b</sup> | Pakistan             | NA <sup>b</sup> | Pakistan             | NA <sup>b</sup> | Spain                | NA <sup>b</sup> | Thailand             | NA <sup>b</sup> |
| Philippines          | NA <sup>b</sup> | Philippines          | NA <sup>b</sup> | Philippines          | NA <sup>b</sup> | Switzerland          | NA <sup>b</sup> | Turkey               | NA <sup>b</sup> |
| Qatar                | NA <sup>b</sup> | Qatar                | NA <sup>b</sup> | Qatar                | NA <sup>b</sup> | Thailand             | NA <sup>b</sup> | United Arab Emirates | NA <sup>b</sup> |
| Switzerland          | NA <sup>b</sup> | Switzerland          | NA <sup>b</sup> | Switzerland          | NA <sup>b</sup> | United Arab Emirates | NA <sup>b</sup> | United Kingdom       | NA <sup>b</sup> |
| United Arab Emirates | NA <sup>b</sup> | United Arab Emirates | NA <sup>b</sup> | United Arab Emirates | NA <sup>b</sup> | Vietnam              | NA <sup>b</sup> | Vietnam              | NA <sup>b</sup> |

Notes:

a. R means each country's ranking.

b. NA: not applicable. Indicates a country not ranked due to incomplete data.

**Supplementary Table S7. Overall COVID-19 containment ranking (without Google Trends)**

| Mar 2020    | R <sup>a</sup> | Apr 2020     | R <sup>a</sup> | May 2020       | R <sup>a</sup> | Jun 2020       | R <sup>a</sup> | Jul 2020       | R <sup>a</sup> | Aug 2020    | R <sup>a</sup> | Sep 2020     | R <sup>a</sup> | Oct 2020     | R <sup>a</sup> | Nov 2020     | R <sup>a</sup> |
|-------------|----------------|--------------|----------------|----------------|----------------|----------------|----------------|----------------|----------------|-------------|----------------|--------------|----------------|--------------|----------------|--------------|----------------|
| Vietnam     | 1              | Taiwan       | 1              | Vietnam        | 1              | Taiwan         | 1              | Taiwan         | 1              | Turkey      | 1              | Taiwan       | 1              | Taiwan       | 1              | Taiwan       | 1              |
| Taiwan      | 2              | South Korea  | 2              | South Korea    | 2              | South Korea    | 2              | South Korea    | 2              | Taiwan      | 2              | Singapore    | 2              | Singapore    | 2              | Singapore    | 2              |
| Qatar       | 3              | Hong Kong    | 3              | Hong Kong      | 3              | Vietnam        | 3              | New Zealand    | 3              | Italy       | 3              | Italy        | 3              | Hong Kong    | 3              | China        | 3              |
| Japan       | 4              | Australia    | 4              | Taiwan         | 4              | Norway         | 4              | Germany        | 4              | South Korea | 4              | South Korea  | 4              | Vietnam      | 4              | Australia    | 4              |
| Thailand    | 5              | Indonesia    | 5              | Australia      | 5              | Australia      | 5              | Thailand       | 5              | Thailand    | 5              | Turkey       | 5              | New Zealand  | 5              | Vietnam      | 5              |
| Hong Kong   | 6              | Vietnam      | 6              | China          | 6              | China          | 6              | Netherlands    | 6              | Norway      | 6              | Germany      | 6              | Japan        | 6              | New Zealand  | 6              |
| Malaysia    | 7              | Japan        | 7              | Norway         | 7              | Switzerland    | 7              | Norway         | 7              | Germany     | 7              | New Zealand  | 7              | Thailand     | 7              | South Korea  | 7              |
| Mexico      | 8              | Malaysia     | 8              | Czech Republic | 8              | New Zealand    | 8              | Malaysia       | 8              | China       | 8              | Norway       | 8              | South Korea  | 8              | Hong Kong    | 8              |
| Egypt       | 9              | Israel       | 9              | Germany        | 9              | Turkey         | 9              | China          | 9              | Finland     | 9              | Thailand     | 9              | China        | 9              | Japan        | 9              |
| Greece      | 10             | South Africa | 10             | Turkey         | 10             | Czech Republic | 10             | Ireland        | 10             | Ireland     | 10             | China        | 10             | Norway       | 10             | Thailand     | 10             |
| Chile       | 11             | China        | 11             | Indonesia      | 11             | Hong Kong      | 11             | Denmark        | 11             | Austria     | 11             | Finland      | 11             | Finland      | 11             | Egypt        | 11             |
| Russia      | 12             | Hungary      | 12             | Singapore      | 12             | Finland        | 12             | France         | 12             | New Zealand | 12             | Poland       | 12             | India        | 12             | India        | 12             |
| New Zealand | 13             | New Zealand  | 13             | Austria        | 13             | Japan          | 13             | Finland        | 13             | Poland      | 13             | Japan        | 13             | Turkey       | 13             | Finland      | 13             |
| Israel      | 14             | Italy        | 14             | Switzerland    | 14             | Denmark        | 14             | Greece         | 14             | Malaysia    | 14             | South Africa | 14             | Saudi Arabia | 14             | Saudi Arabia | 14             |
| South Korea | 15             | Poland       | 15             | Russia         | 15             | Greece         | 15             | Italy          | 15             | Hungary     | 15             | Greece       | 15             | Canada       | 15             | Israel       | 15             |
| Singapore   | 16             | Egypt        | 16             | New Zealand    | 16             | Malaysia       | 16             | Czech Republic | 16             | Portugal    | 16             | Vietnam      | 16             | Brazil       | 16             | South Africa | 16             |

|                |    |                |    |              |    |               |    |                |    |                |    |                |    |                |    |                |    |
|----------------|----|----------------|----|--------------|----|---------------|----|----------------|----|----------------|----|----------------|----|----------------|----|----------------|----|
| Norway         | 17 | Czech Republic | 17 | Israel       | 17 | Russia        | 17 | Turkey         | 17 | Saudi Arabia   | 17 | Malaysia       | 17 | Chile          | 17 | Ireland        | 17 |
| Australia      | 18 | Norway         | 18 | Greece       | 18 | Israel        | 18 | Poland         | 18 | Switzerland    | 18 | United Kingdom | 18 | Ireland        | 18 | Turkey         | 18 |
| Philippines    | 19 | Greece         | 19 | Saudi Arabia | 19 | Austria       | 19 | Japan          | 19 | Singapore      | 19 | Portugal       | 19 | South Africa   | 19 | Chile          | 19 |
| Denmark        | 20 | Argentina      | 20 | Ireland      | 20 | France        | 20 | Hungary        | 20 | United Kingdom | 20 | Ireland        | 20 | Israel         | 20 | Argentina      | 20 |
| India          | 21 | Portugal       | 21 | Malaysia     | 21 | Portugal      | 21 | Switzerland    | 21 | Japan          | 21 | Brazil         | 21 | Australia      | 21 | Brazil         | 21 |
| France         | 22 | Saudi Arabia   | 22 | South Africa | 22 | Germany       | 22 | Vietnam        | 22 | France         | 22 | India          | 22 | Germany        | 22 | France         | 22 |
| Brazil         | 23 | Finland        | 23 | Poland       | 23 | Saudi Arabia  | 23 | Spain          | 23 | Hong Kong      | 23 | Switzerland    | 23 | Italy          | 23 | Norway         | 23 |
| Finland        | 24 | Brazil         | 24 | Japan        | 24 | Singapore     | 24 | Portugal       | 24 | South Africa   | 24 | United States  | 24 | Greece         | 24 | Malaysia       | 24 |
| Netherlands    | 25 | Germany        | 25 | Egypt        | 25 | Egypt         | 25 | Russia         | 25 | Denmark        | 25 | Hong Kong      | 25 | Austria        | 25 | Germany        | 25 |
| Canada         | 26 | Colombia       | 26 | Denmark      | 26 | Italy         | 26 | Saudi Arabia   | 26 | Canada         | 26 | Saudi Arabia   | 26 | Portugal       | 26 | Russia         | 26 |
| Sweden         | 27 | Chile          | 27 | Finland      | 27 | Netherlands   | 27 | Singapore      | 27 | Belgium        | 27 | Sweden         | 27 | Denmark        | 27 | Denmark        | 27 |
| Ireland        | 28 | France         | 28 | Portugal     | 28 | Indonesia     | 28 | Belgium        | 28 | Netherlands    | 28 | Canada         | 28 | Argentina      | 28 | Colombia       | 28 |
| Italy          | 29 | Austria        | 29 | Spain        | 29 | Canada        | 29 | Egypt          | 29 | Australia      | 29 | Russia         | 29 | Russia         | 29 | Belgium        | 29 |
| Germany        | 30 | Turkey         | 30 | Hungary      | 30 | Spain         | 30 | Austria        | 30 | Russia         | 30 | Egypt          | 30 | Malaysia       | 30 | United Kingdom | 30 |
| Switzerland    | 31 | Ireland        | 31 | Brazil       | 31 | Qatar         | 31 | United Kingdom | 31 | Sweden         | 31 | Belgium        | 31 | Sweden         | 31 | Netherlands    | 31 |
| United Kingdom | 32 | Switzerland    | 32 | Belgium      | 32 | Brazil        | 32 | Sweden         | 32 | Greece         | 32 | Mexico         | 32 | United Kingdom | 32 | Canada         | 32 |
| China          | 33 | Denmark        | 33 | Qatar        | 33 | United States | 33 | Canada         | 33 | Czech          | 33 | Denmark        | 33 | Spain          | 33 | Mexico         | 33 |





Emirates

Emirates

Emirates

Emirates

Emirates

Emirates

Emirates

Emirates

Emirates

Notes:

a. R means each country's ranking.

b. NA: not applicable. Indicates a country not ranked due to incomplete data.

| <b>Dec 2020</b> | <b>R<sup>a</sup></b> | <b>Jan 2021</b> | <b>R<sup>a</sup></b> | <b>Feb 2021</b> | <b>R<sup>a</sup></b> | <b>Mar 2021</b> | <b>R<sup>a</sup></b> | <b>Apr 2021</b> | <b>R<sup>a</sup></b> | <b>May 2021</b> | <b>R<sup>a</sup></b> | <b>Jun 2021</b> | <b>R<sup>a</sup></b> |
|-----------------|----------------------|-----------------|----------------------|-----------------|----------------------|-----------------|----------------------|-----------------|----------------------|-----------------|----------------------|-----------------|----------------------|
| Taiwan          | 1                    | China           | 1                    | China           | 1                    | China           | 1                    | United Kingdom  | 1                    | United Kingdom  | 1                    | Philippines     | 1                    |
| China           | 2                    | Singapore       | 2                    | Singapore       | 2                    | Singapore       | 2                    | Singapore       | 2                    | Singapore       | 2                    | Singapore       | 2                    |
| Israel          | 3                    | Taiwan          | 3                    | India           | 3                    | India           | 3                    | Malaysia        | 3                    | Spain           | 3                    | Austria         | 3                    |
| Norway          | 4                    | Saudi Arabia    | 4                    | Saudi Arabia    | 4                    | Saudi Arabia    | 4                    | Spain           | 4                    | Austria         | 4                    | Portugal        | 4                    |
| Finland         | 5                    | Argentina       | 5                    | Taiwan          | 5                    | Australia       | 5                    | Portugal        | 5                    | United States   | 5                    | China           | 5                    |
| Chile           | 6                    | Israel          | 6                    | Australia       | 6                    | Taiwan          | 6                    | United States   | 6                    | Philippines     | 6                    | Italy           | 6                    |
| Argentina       | 7                    | India           | 7                    | New Zealand     | 7                    | New Zealand     | 7                    | China           | 7                    | Portugal        | 7                    | United States   | 7                    |
| Ireland         | 8                    | Finland         | 8                    | Denmark         | 8                    | Vietnam         | 8                    | Austria         | 8                    | China           | 8                    | Czech Republic  | 8                    |
| Canada          | 9                    | Turkey          | 9                    | Argentina       | 9                    | Hong Kong       | 9                    | Italy           | 9                    | Italy           | 9                    | United Kingdom  | 9                    |
| Germany         | 10                   | Russia          | 10                   | Israel          | 10                   | Canada          | 10                   | Philippines     | 10                   | Malaysia        | 10                   | Mexico          | 10                   |
| Italy           | 11                   | Italy           | 11                   | South Korea     | 11                   | Israel          | 11                   | Russia          | 11                   | Germany         | 11                   | Spain           | 11                   |
| Portugal        | 12                   | Indonesia       | 12                   | Turkey          | 12                   | South Korea     | 12                   | South Korea     | 12                   | South Korea     | 12                   | France          | 12                   |
| United Kingdom  | 13                   | Egypt           | 13                   | Canada          | 13                   | Argentina       | 13                   | Vietnam         | 13                   | Mexico          | 13                   | South Korea     | 13                   |
| France          | 14                   | Denmark         | 14                   | Italy           | 14                   | Austria         | 14                   | France          | 14                   | France          | 14                   | Belgium         | 14                   |
| Poland          | 15                   | France          | 15                   | Hong Kong       | 15                   | United Kingdom  | 15                   | Mexico          | 15                   | Russia          | 15                   | Sweden          | 15                   |

|                |                 |                |    |                |    |               |    |                |                 |                |                 |           |                 |
|----------------|-----------------|----------------|----|----------------|----|---------------|----|----------------|-----------------|----------------|-----------------|-----------|-----------------|
| Russia         | 16              | Norway         | 16 | Japan          | 16 | Thailand      | 16 | Japan          | 16              | Hong Kong      | 16              | Germany   | 16              |
| Greece         | 17              | Greece         | 17 | United Kingdom | 17 | Japan         | 17 | Hong Kong      | 17              | Japan          | 17              | Hong Kong | 17              |
| Austria        | 18              | Chile          | 18 | Finland        | 18 | Turkey        | 18 | Taiwan         | 18              | Belgium        | 18              | Japan     | 18              |
| Mexico         | 19              | Netherlands    | 19 | Austria        | 19 | Egypt         | 19 | Germany        | 19              | Sweden         | 19              | Malaysia  | 19              |
| Czech Republic | 20              | Austria        | 20 | Chile          | 20 | Russia        | 20 | Belgium        | 20              | Czech Republic | 20              | Poland    | 20              |
| Belgium        | 21              | Poland         | 21 | Netherlands    | 21 | Portugal      | 21 | Poland         | 21              | Poland         | 21              | Russia    | 21              |
| Switzerland    | 22              | Spain          | 22 | Ireland        | 22 | Chile         | 22 | Czech Republic | 22              | Vietnam        | 22              | Vietnam   | 22              |
| Hungary        | 23              | Germany        | 23 | Norway         | 23 | France        | 23 | Sweden         | 23              | Taiwan         | 23              | Taiwan    | 23              |
| Denmark        | 24              | Belgium        | 24 | Thailand       | 24 | Ireland       | 24 | Argentina      | NA <sup>b</sup> | Argentina      | NA <sup>b</sup> | Argentina | NA <sup>b</sup> |
| Sweden         | 25              | Sweden         | 25 | Switzerland    | 25 | Germany       | 25 | Australia      | NA <sup>b</sup> | Australia      | NA <sup>b</sup> | Australia | NA <sup>b</sup> |
| United States  | 26              | Switzerland    | 26 | Portugal       | 26 | Malaysia      | 26 | Brazil         | NA <sup>b</sup> | Brazil         | NA <sup>b</sup> | Brazil    | NA <sup>b</sup> |
| Australia      | NA <sup>b</sup> | United Kingdom | 27 | Poland         | 27 | Spain         | 27 | Canada         | NA <sup>b</sup> | Canada         | NA <sup>b</sup> | Canada    | NA <sup>b</sup> |
| Brazil         | NA <sup>b</sup> | Czech Republic | 28 | Greece         | 28 | United States | 28 | Chile          | NA <sup>b</sup> | Chile          | NA <sup>b</sup> | Chile     | NA <sup>b</sup> |
| Colombia       | NA <sup>b</sup> | Hungary        | 29 | France         | 29 | Denmark       | 29 | Colombia       | NA <sup>b</sup> | Colombia       | NA <sup>b</sup> | Colombia  | NA <sup>b</sup> |
| Egypt          | NA <sup>b</sup> | Brazil         | 30 | Spain          | 30 | Italy         | 30 | Denmark        | NA <sup>b</sup> | Denmark        | NA <sup>b</sup> | Denmark   | NA <sup>b</sup> |
| Hong Kong      | NA <sup>b</sup> | Ireland        | 31 | South Africa   | 31 | Switzerland   | 31 | Egypt          | NA <sup>b</sup> | Egypt          | NA <sup>b</sup> | Egypt     | NA <sup>b</sup> |
| India          | NA <sup>b</sup> | Canada         | 32 | Sweden         | 32 | Indonesia     | 32 | Finland        | NA <sup>b</sup> | Finland        | NA <sup>b</sup> | Finland   | NA <sup>b</sup> |

|                      |                 |                      |                 |                      |                 |                |                 |              |                 |              |                 |              |                 |
|----------------------|-----------------|----------------------|-----------------|----------------------|-----------------|----------------|-----------------|--------------|-----------------|--------------|-----------------|--------------|-----------------|
| Indonesia            | NA <sup>b</sup> | Mexico               | 33              | Colombia             | 33              | Netherlands    | 33              | Greece       | NA <sup>b</sup> | Greece       | NA <sup>b</sup> | Greece       | NA <sup>b</sup> |
| Japan                | NA <sup>b</sup> | United States        | 34              | Belgium              | 34              | South Africa   | 34              | Hungary      | NA <sup>b</sup> | Hungary      | NA <sup>b</sup> | Hungary      | NA <sup>b</sup> |
| Malaysia             | NA <sup>b</sup> | Portugal             | 35              | Hungary              | 35              | Colombia       | 35              | India        | NA <sup>b</sup> | India        | NA <sup>b</sup> | India        | NA <sup>b</sup> |
| Netherlands          | NA <sup>b</sup> | Australia            | NA <sup>b</sup> | Germany              | 36              | Norway         | 36              | Indonesia    | NA <sup>b</sup> | Indonesia    | NA <sup>b</sup> | Indonesia    | NA <sup>b</sup> |
| New Zealand          | NA <sup>b</sup> | Colombia             | NA <sup>b</sup> | Indonesia            | 37              | Greece         | 37              | Ireland      | NA <sup>b</sup> | Ireland      | NA <sup>b</sup> | Ireland      | NA <sup>b</sup> |
| Pakistan             | NA <sup>b</sup> | Hong Kong            | NA <sup>b</sup> | Mexico               | 38              | Mexico         | 38              | Israel       | NA <sup>b</sup> | Israel       | NA <sup>b</sup> | Israel       | NA <sup>b</sup> |
| Peru                 | NA <sup>b</sup> | Japan                | NA <sup>b</sup> | United States        | 39              | Brazil         | 39              | Netherlands  | NA <sup>b</sup> | Netherlands  | NA <sup>b</sup> | Netherlands  | NA <sup>b</sup> |
| Philippines          | NA <sup>b</sup> | Malaysia             | NA <sup>b</sup> | Philippines          | 40              | Belgium        | 40              | New Zealand  | NA <sup>b</sup> | New Zealand  | NA <sup>b</sup> | New Zealand  | NA <sup>b</sup> |
| Qatar                | NA <sup>b</sup> | New Zealand          | NA <sup>b</sup> | Malaysia             | 41              | Sweden         | 41              | Norway       | NA <sup>b</sup> | Norway       | NA <sup>b</sup> | Norway       | NA <sup>b</sup> |
| Saudi Arabia         | NA <sup>b</sup> | Pakistan             | NA <sup>b</sup> | Brazil               | 42              | Finland        | 42              | Pakistan     | NA <sup>b</sup> | Pakistan     | NA <sup>b</sup> | Pakistan     | NA <sup>b</sup> |
| Singapore            | NA <sup>b</sup> | Peru                 | NA <sup>b</sup> | Czech Republic       | 43              | Philippines    | 43              | Peru         | NA <sup>b</sup> | Peru         | NA <sup>b</sup> | Peru         | NA <sup>b</sup> |
| South Africa         | NA <sup>b</sup> | Philippines          | NA <sup>b</sup> | Peru                 | 44              | Czech Republic | 44              | Qatar        | NA <sup>b</sup> | Qatar        | NA <sup>b</sup> | Qatar        | NA <sup>b</sup> |
| South Korea          | NA <sup>b</sup> | Qatar                | NA <sup>b</sup> | Egypt                | NA <sup>b</sup> | Poland         | 45              | Saudi Arabia | NA <sup>b</sup> | Saudi Arabia | NA <sup>b</sup> | Saudi Arabia | NA <sup>b</sup> |
| Spain                | NA <sup>b</sup> | South Africa         | NA <sup>b</sup> | Pakistan             | NA <sup>b</sup> | Peru           | 46              | South Africa | NA <sup>b</sup> | South Africa | NA <sup>b</sup> | South Africa | NA <sup>b</sup> |
| Thailand             | NA <sup>b</sup> | South Korea          | NA <sup>b</sup> | Qatar                | NA <sup>b</sup> | Hungary        | 47              | Switzerland  | NA <sup>b</sup> | Switzerland  | NA <sup>b</sup> | Switzerland  | NA <sup>b</sup> |
| Turkey               | NA <sup>b</sup> | Thailand             | NA <sup>b</sup> | Russia               | NA <sup>b</sup> | Pakistan       | NA <sup>b</sup> | Thailand     | NA <sup>b</sup> | Thailand     | NA <sup>b</sup> | Thailand     | NA <sup>b</sup> |
| United Arab Emirates | NA <sup>b</sup> | United Arab Emirates | NA <sup>b</sup> | United Arab Emirates | NA <sup>b</sup> |                | NA <sup>b</sup> |              | NA <sup>b</sup> |              | NA <sup>b</sup> |              | NA <sup>b</sup> |
|                      |                 |                      |                 |                      |                 | Qatar          |                 | Turkey       |                 | Turkey       |                 | Turkey       |                 |

|         |                 |         |                 |         |                 |                      |                 |                      |                 |                      |                 |                      |                 |
|---------|-----------------|---------|-----------------|---------|-----------------|----------------------|-----------------|----------------------|-----------------|----------------------|-----------------|----------------------|-----------------|
| Vietnam | NA <sup>b</sup> | Vietnam | NA <sup>b</sup> | Vietnam | NA <sup>b</sup> | United Arab Emirates | NA <sup>b</sup> | United Arab Emirates | NA <sup>b</sup> | United Arab Emirates | NA <sup>b</sup> | United Arab Emirates | NA <sup>b</sup> |
|---------|-----------------|---------|-----------------|---------|-----------------|----------------------|-----------------|----------------------|-----------------|----------------------|-----------------|----------------------|-----------------|

Notes:

a. R means each country's ranking.

b. NA: not applicable. Indicates a country not ranked due to incomplete data.

| <b>Jul 2021</b> | <b>R<sup>a</sup></b> | <b>Aug 2021</b> | <b>R<sup>a</sup></b> | <b>Sep 2021</b> | <b>R<sup>a</sup></b> | <b>Oct 2021</b> | <b>R<sup>a</sup></b> | <b>Nov 2021</b> | <b>R<sup>a</sup></b> |
|-----------------|----------------------|-----------------|----------------------|-----------------|----------------------|-----------------|----------------------|-----------------|----------------------|
| Chile           | 1                    | Singapore       | 1                    | Denmark         | 1                    | Chile           | 1                    | Italy           | 1                    |
| Austria         | 2                    | Canada          | 2                    | Chile           | 2                    | Colombia        | 2                    | Malaysia        | 2                    |
| Hungary         | 3                    | Colombia        | 3                    | Colombia        | 3                    | Canada          | 3                    | Taiwan          | 3                    |
| Singapore       | 4                    | Chile           | 4                    | Spain           | 4                    | Peru            | 4                    | South Korea     | 4                    |
| Greece          | 5                    | Hungary         | 5                    | China           | 5                    | Brazil          | 5                    | Peru            | 5                    |
| China           | 6                    | Czech Republic  | 6                    | Portugal        | 6                    | Hong Kong       | 6                    | Japan           | 6                    |
| Czech Republic  | 7                    | Greece          | 7                    | Greece          | 7                    | China           | 7                    | Sweden          | 7                    |
| Norway          | 8                    | Argentina       | 8                    | Hungary         | 8                    | Sweden          | 8                    | Chile           | 8                    |
| Peru            | 9                    | Norway          | 9                    | Czech Republic  | 9                    | Switzerland     | 9                    | China           | 9                    |
| Canada          | 10                   | Portugal        | 10                   | South Korea     | 10                   | Israel          | 10                   | Canada          | 10                   |
| Switzerland     | 11                   | Peru            | 11                   | Peru            | 11                   | South Korea     | 11                   | Hong Kong       | 11                   |
| Sweden          | 12                   | Italy           | 12                   | France          | 12                   | Poland          | 12                   | Israel          | 12                   |
| Italy           | 13                   | Poland          | 13                   | Austria         | 13                   | Italy           | 13                   | Australia       | 13                   |
| South Korea     | 14                   | Sweden          | 14                   | Poland          | 14                   | Taiwan          | 14                   | Colombia        | 14                   |
| Saudi Arabia    | 15                   | South Korea     | 15                   | Hong Kong       | 15                   | Greece          | 15                   | Mexico          | 15                   |
| Japan           | 16                   | Hong Kong       | 16                   | Japan           | 16                   | Austria         | 16                   | Switzerland     | 16                   |

|               |    |               |    |              |    |                |                 |                |                 |
|---------------|----|---------------|----|--------------|----|----------------|-----------------|----------------|-----------------|
| Portugal      | 17 | Austria       | 17 | Italy        | 17 | Malaysia       | 17              | United States  | 17              |
| Colombia      | 18 | Saudi Arabia  | 18 | Argentina    | 18 | Australia      | 18              | Russia         | 18              |
| United States | 19 | China         | 19 | Germany      | 19 | Denmark        | 19              | Finland        | 19              |
| New Zealand   | 20 | France        | 20 | Canada       | 20 | Turkey         | 20              | Germany        | 20              |
| Argentina     | 21 | Denmark       | 21 | Netherlands  | 21 | Philippines    | 21              | Netherlands    | 21              |
| Hong Kong     | 22 | Netherlands   | 22 | India        | 22 | Finland        | 22              | Austria        | 22              |
| Poland        | 23 | Germany       | 23 | Singapore    | 23 | Japan          | 23              | Ireland        | 23              |
| Australia     | 24 | Belgium       | 24 | Belgium      | 24 | Netherlands    | 24              | Poland         | 24              |
| Philippines   | 25 | India         | 25 | Philippines  | 25 | Hungary        | 25              | Hungary        | 25              |
| Mexico        | 26 | Mexico        | 26 | New Zealand  | 26 | Mexico         | 26              | Czech Republic | 26              |
| Belgium       | 27 | Spain         | 27 | Saudi Arabia | 27 | Russia         | 27              | Argentina      | NA <sup>b</sup> |
| Germany       | 28 | Australia     | 28 | Taiwan       | 28 | United States  | 28              | Belgium        | NA <sup>b</sup> |
| Denmark       | 29 | Philippines   | 29 | Finland      | 29 | Czech Republic | 29              | Brazil         | NA <sup>b</sup> |
| India         | 30 | Finland       | 30 | Brazil       | 30 | Ireland        | 30              | Denmark        | NA <sup>b</sup> |
| Israel        | 31 | New Zealand   | 31 | Norway       | 31 | Germany        | 31              | Egypt          | NA <sup>b</sup> |
| France        | 32 | Japan         | 32 | Turkey       | 32 | Belgium        | 32              | France         | NA <sup>b</sup> |
| Finland       | 33 | United States | 33 | Ireland      | 33 | United Kingdom | 33              | Greece         | NA <sup>b</sup> |
| Brazil        | 34 | Ireland       | 34 | Sweden       | 34 | Argentina      | NA <sup>b</sup> | India          | NA <sup>b</sup> |



|                      |                 |                      |                 |                      |                 |                      |                 |                      |                 |
|----------------------|-----------------|----------------------|-----------------|----------------------|-----------------|----------------------|-----------------|----------------------|-----------------|
| Turkey               | 35              | Switzerland          | 35              | Russia               | 35              | Egypt                | NA <sup>b</sup> | Indonesia            | NA <sup>b</sup> |
| Ireland              | 36              | United Kingdom       | 36              | Switzerland          | 36              | France               | NA <sup>b</sup> | New Zealand          | NA <sup>b</sup> |
| Netherlands          | 37              | Israel               | 37              | United Kingdom       | 37              | India                | NA <sup>b</sup> | Norway               | NA <sup>b</sup> |
| Spain                | 38              | Brazil               | 38              | United States        | 38              | Indonesia            | NA <sup>b</sup> | Pakistan             | NA <sup>b</sup> |
| United Kingdom       | 39              | Russia               | 39              | Israel               | 39              | New Zealand          | NA <sup>b</sup> | Philippines          | NA <sup>b</sup> |
| Thailand             | 40              | Turkey               | 40              | Thailand             | 40              | Norway               | NA <sup>b</sup> | Portugal             | NA <sup>b</sup> |
| Russia               | 41              | Thailand             | 41              | Australia            | 41              | Pakistan             | NA <sup>b</sup> | Qatar                | NA <sup>b</sup> |
| Malaysia             | 42              | Malaysia             | 42              | Malaysia             | 42              | Portugal             | NA <sup>b</sup> | Saudi Arabia         | NA <sup>b</sup> |
| South Africa         | 43              | South Africa         | 43              | Mexico               | 43              | Qatar                | NA <sup>b</sup> | Singapore            | NA <sup>b</sup> |
| Taiwan               | 44              | Taiwan               | 44              | South Africa         | 44              | Saudi Arabia         | NA <sup>b</sup> | South Africa         | NA <sup>b</sup> |
| Vietnam              | 45              | Vietnam              | 45              | Vietnam              | 45              | Singapore            | NA <sup>b</sup> | Spain                | NA <sup>b</sup> |
| Egypt                | NA <sup>b</sup> | Egypt                | NA <sup>b</sup> | Egypt                | NA <sup>b</sup> | South Africa         | NA <sup>b</sup> | Thailand             | NA <sup>b</sup> |
| Indonesia            | NA <sup>b</sup> | Indonesia            | NA <sup>b</sup> | Indonesia            | NA <sup>b</sup> | Spain                | NA <sup>b</sup> | Turkey               | NA <sup>b</sup> |
| Pakistan             | NA <sup>b</sup> | Pakistan             | NA <sup>b</sup> | Pakistan             | NA <sup>b</sup> | Thailand             | NA <sup>b</sup> | United Arab Emirates | NA <sup>b</sup> |
| Qatar                | NA <sup>b</sup> | Qatar                | NA <sup>b</sup> | Qatar                | NA <sup>b</sup> | United Arab Emirates | NA <sup>b</sup> | United Kingdom       | NA <sup>b</sup> |
| United Arab Emirates | NA <sup>b</sup> | United Arab Emirates | NA <sup>b</sup> | United Arab Emirates | NA <sup>b</sup> | Vietnam              | NA <sup>b</sup> | Vietnam              | NA <sup>b</sup> |

Notes:

a. R means each country's ranking.

b. NA: not applicable. Indicates a country not ranked due to incomplete data.

## **Supplementary Information 9. Different baseline risk levels of 50 countries and territories and their respective COVID-19 containment scores (with Google Trends) from March 2020 to November 2021**

To obtain the baseline risk score for each of the 50 nations, we take the average of the three risk factors in Supplementary Table S1: obesity prevalence, share of population over the age of 65, and international arrivals. After acquiring the average baseline risk score for each country, we characterize the three diverse baseline risk levels — Low, Medium, and High — by subtracting the minimum baseline risk score from the maximum baseline risk score among the 50 nations and dividing the difference into three equal portions.

Supplementary Figures S11–S31 demonstrate the three different COVID-19 baseline risk levels and each country’s respective COVID-19 containment score (with Google Trends) for the 50 nations of interest during the period of March 2020- November 2021. Most of the European countries are characterized to be at the high baseline risk level, while the Asian and African countries are characterized to be at low or middle baseline risk levels. However, the American nations were found to be evenly distributed across the three distinct baseline risk levels. In addition, from these graphs, it is evident that most Asian nations have higher COVID-19 containment scores than those in Europe or the Americas before March 2021.

Supplementary Figure S32a shows the monthly average containment performance scores of all 50 countries grouped according to the three baseline risk levels. Supplementary Figure S32b shows the monthly average people covered by vaccines grouped according to the three baseline risk levels.

**Supplementary Figure S11. Different baseline risk levels of 50 countries and territories and their respective COVID-19 containment scores (with Google Trends) in March 2020.**

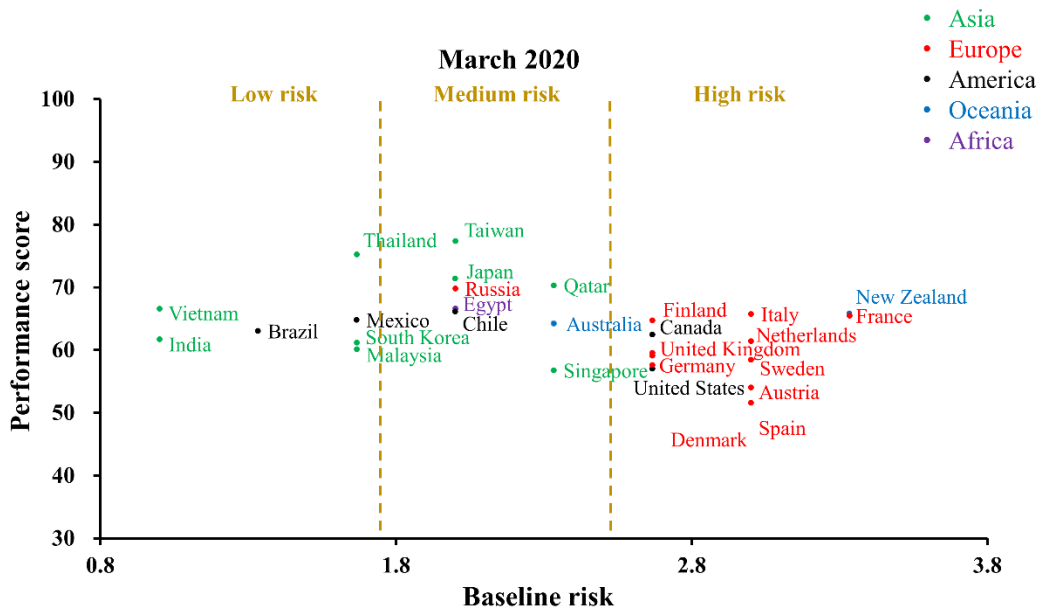

Note: some places might not be included due to missing data.

**Supplementary Figure S12. Different baseline risk levels of 50 countries and territories and their respective COVID-19 containment scores (with Google Trends) in April 2020.**

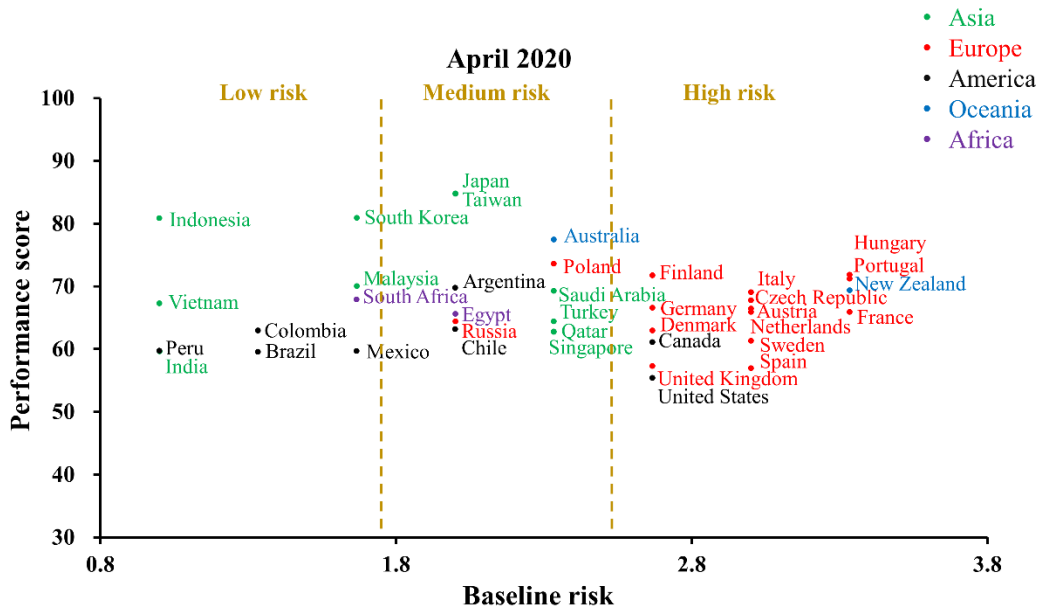

Note: some places might not be included due to missing data.

**Supplementary Figure S13. Different baseline risk levels of 50 countries and territories and their respective COVID-19 containment scores (with Google Trends) in May 2020**

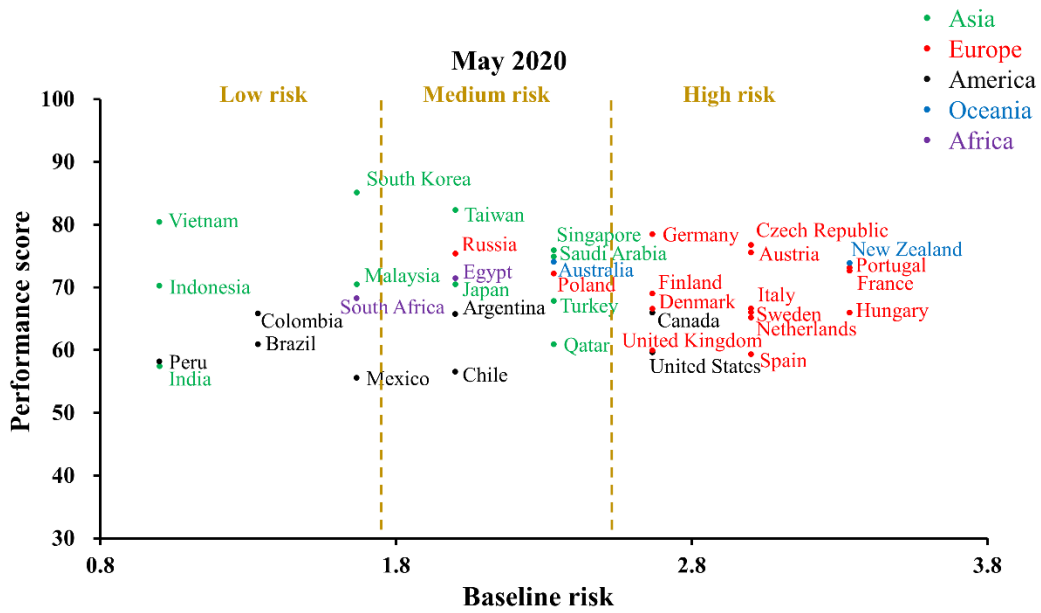

Note: some places might not be included due to missing data.

**Supplementary Figure S14. Different baseline risk levels of 50 countries and territories and their respective COVID-19 containment scores (with Google Trends) in June 2020**

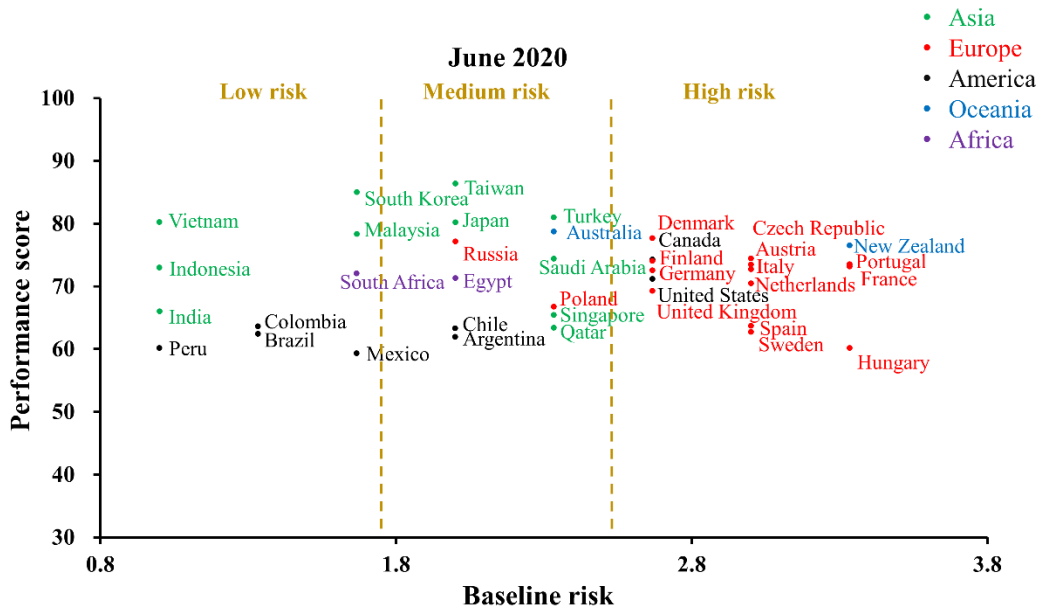

Note: some places might not be included due to missing data.

**Supplementary Figure S15. Different baseline risk levels of 50 countries and territories and their respective COVID-19 containment scores (with Google Trends) in July 2020**

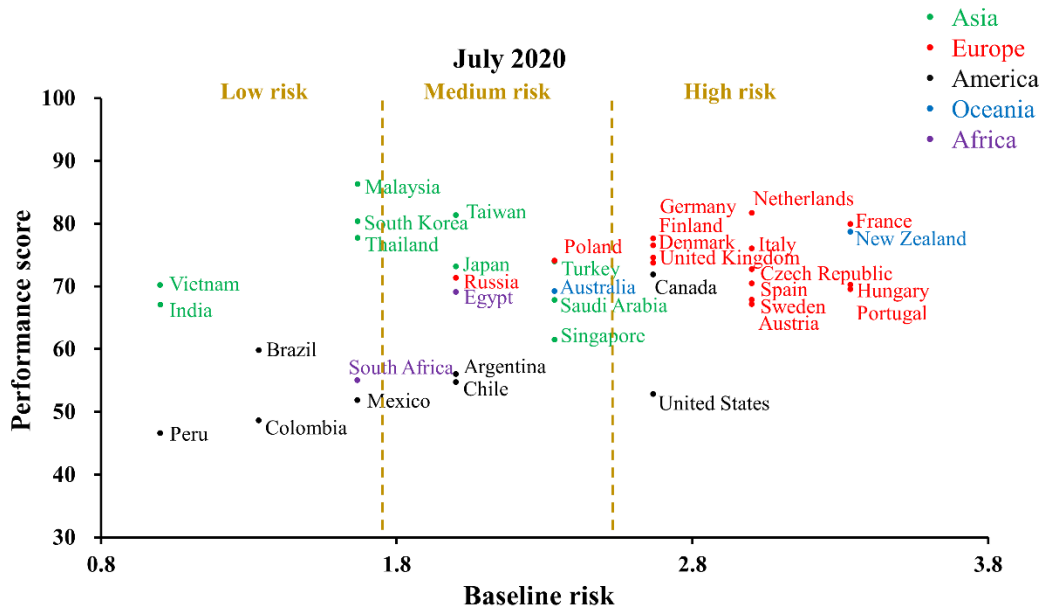

Note: some places might not be included due to missing data.

**Supplementary Figure S16. Different baseline risk levels of 50 countries and territories and their respective COVID-19 containment scores (with Google Trends) in August 2020**

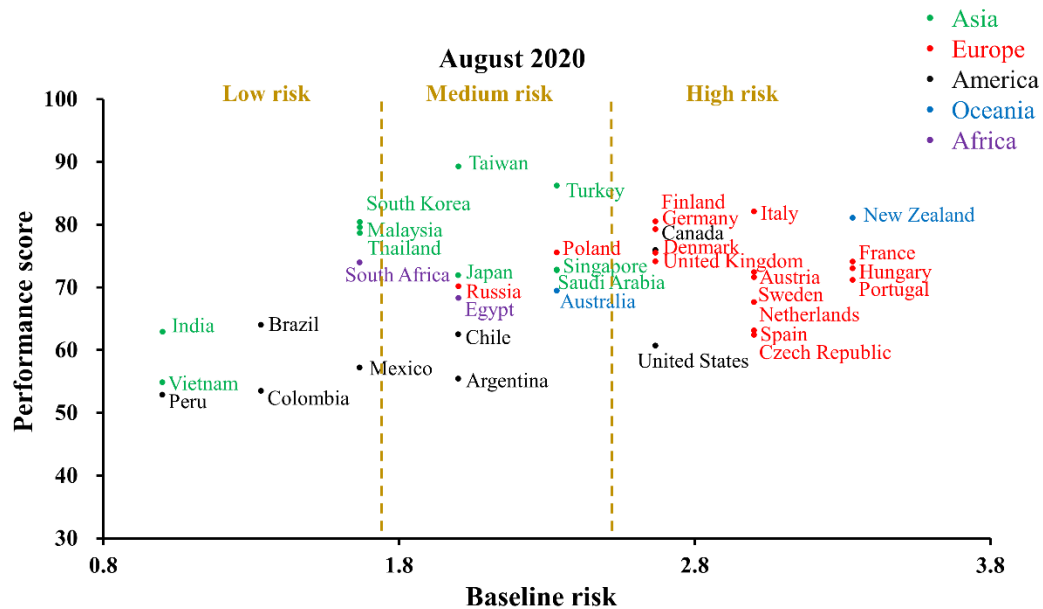

Note: some places might not be included due to missing data.

**Supplementary Figure S17. Different baseline risk levels of 50 countries and territories and their respective COVID-19 containment scores (with Google Trends) in September 2020**

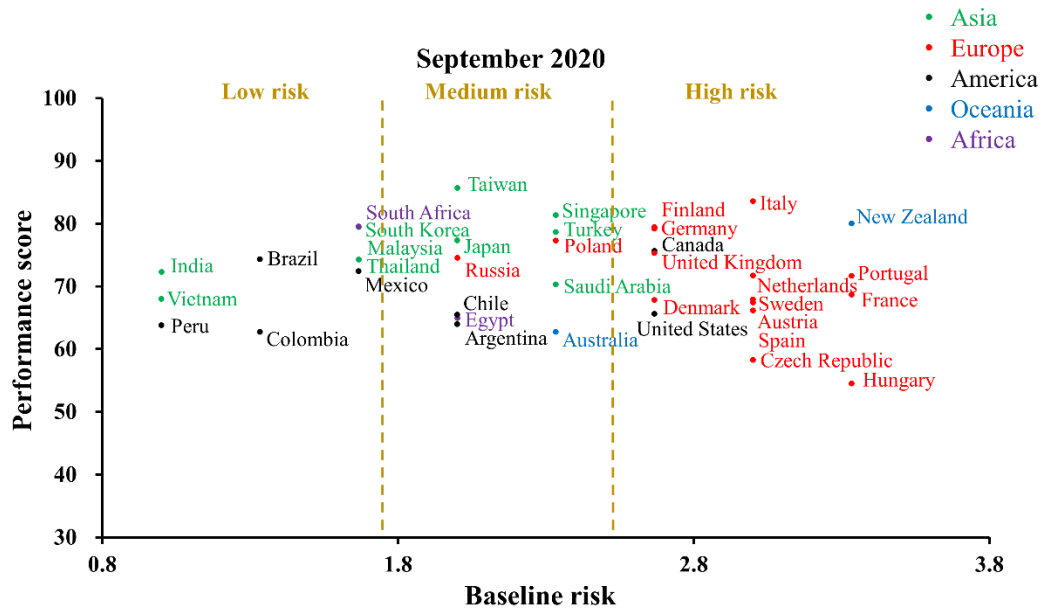

Note: some places might not be included due to missing data.

**Supplementary Figure S18. Different baseline risk levels of 50 countries and territories and their respective COVID-19 containment scores (with Google Trends) in October 2020**

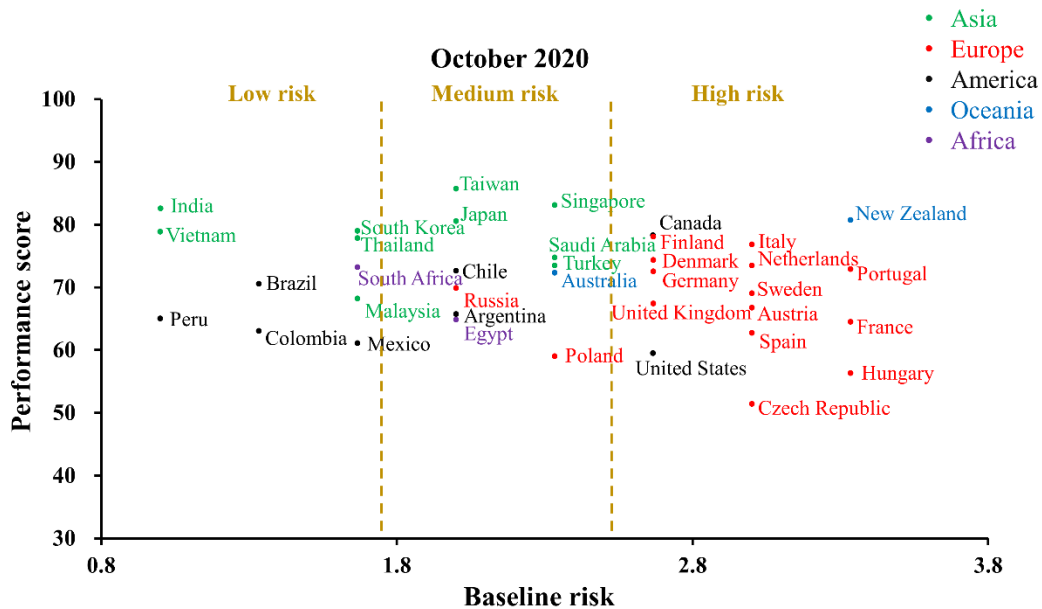

Note: some places might not be included due to missing data.

**Supplementary Figure S19. Different baseline risk levels of 50 countries and territories and their respective COVID-19 containment scores (with Google Trends) in November 2020**

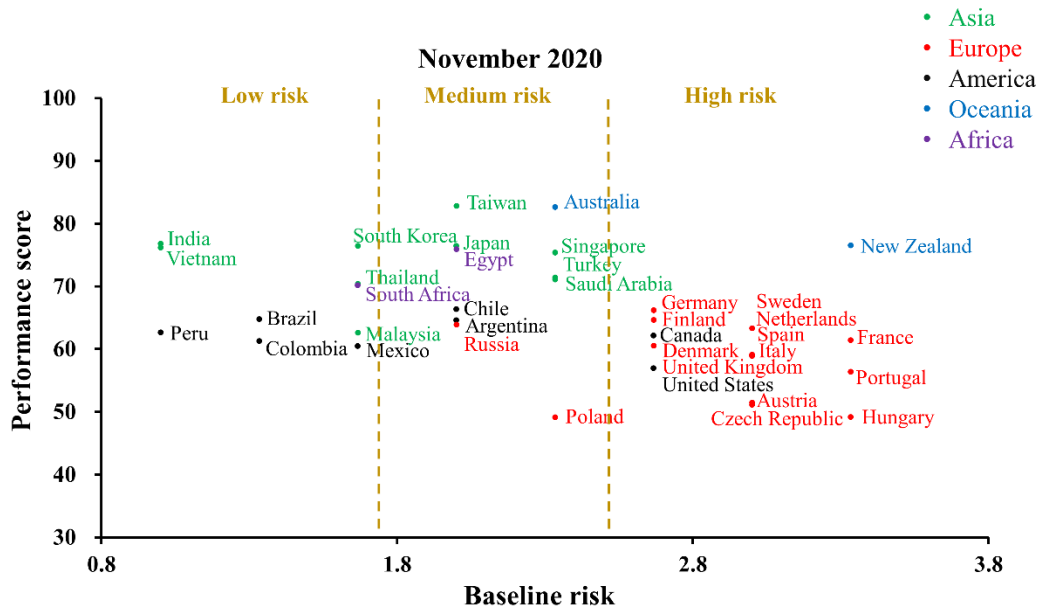

Note: some places might not be included due to missing data.

**Supplementary Figure S20. Different baseline risk levels of 50 countries and territories and their respective COVID-19 containment scores (with Google Trends) in December 2020**

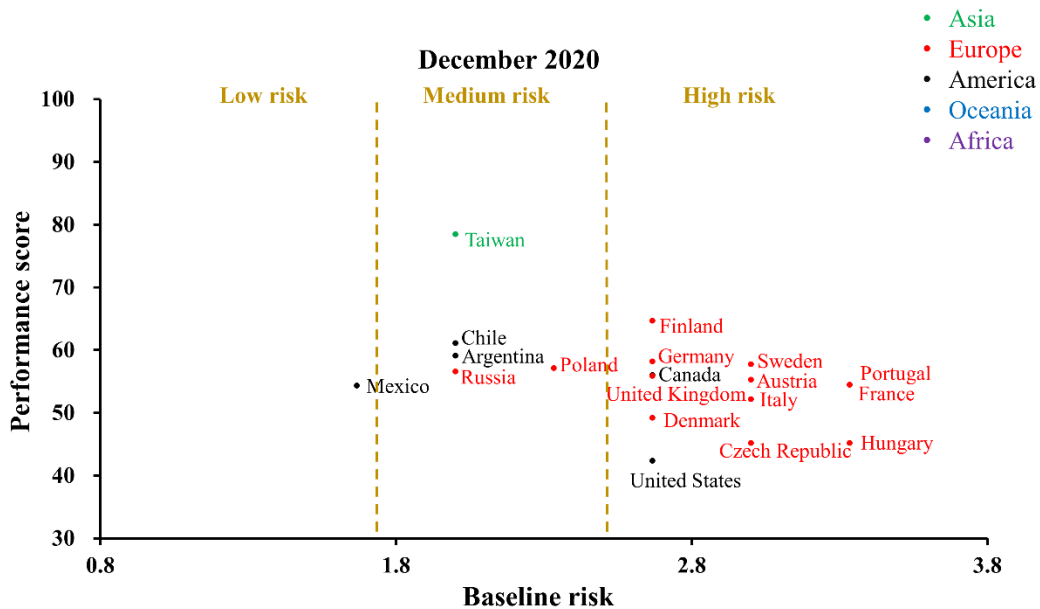

Note: some places might not be included due to missing data.

**Supplementary Figure S21. Different baseline risk levels of 50 countries and territories and their respective COVID-19 containment scores (with Google Trends) in January 2021**

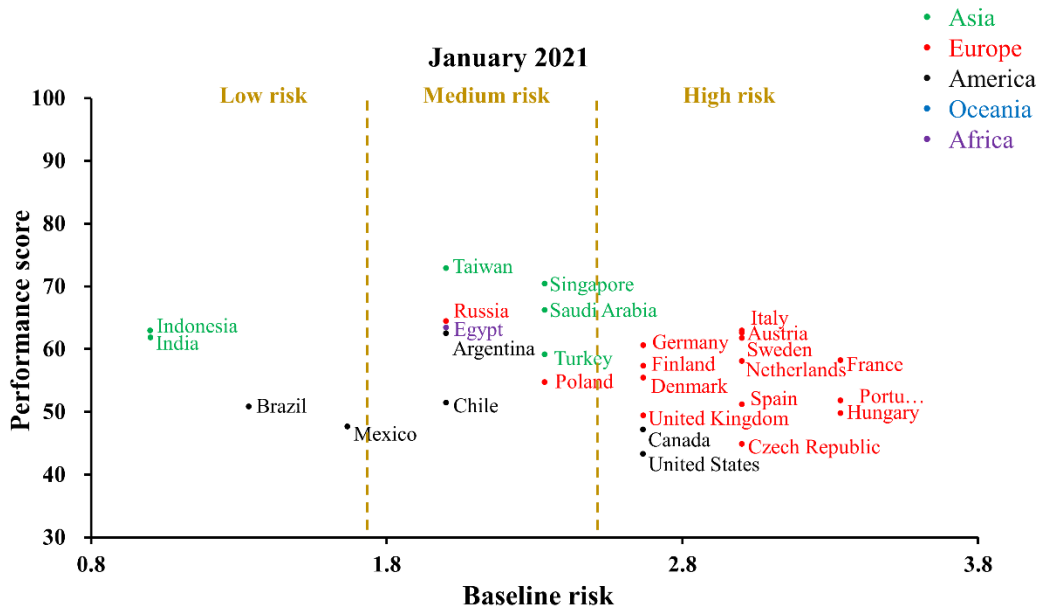

Note: some places might not be included due to missing data.

**Supplementary Figure S22. Different baseline risk levels of 50 countries and territories and their respective COVID-19 containment scores (with Google Trends) in February 2021**

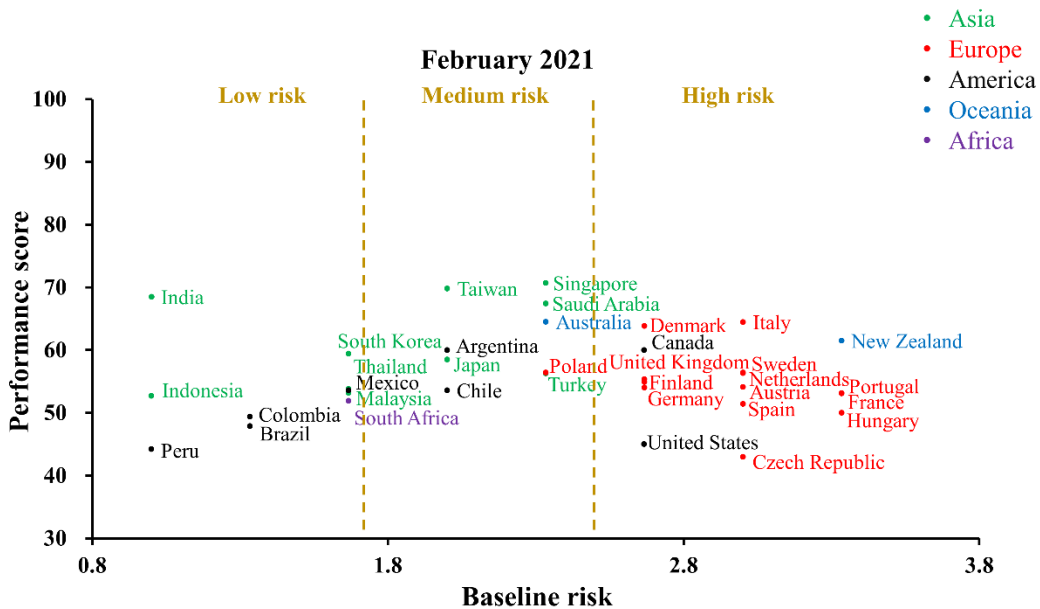

Note: some places might not be included due to missing data.



**Supplementary Figure S23. Different baseline risk levels of 50 countries and territories and their respective COVID-19 containment scores (with Google Trends) in March 2021**

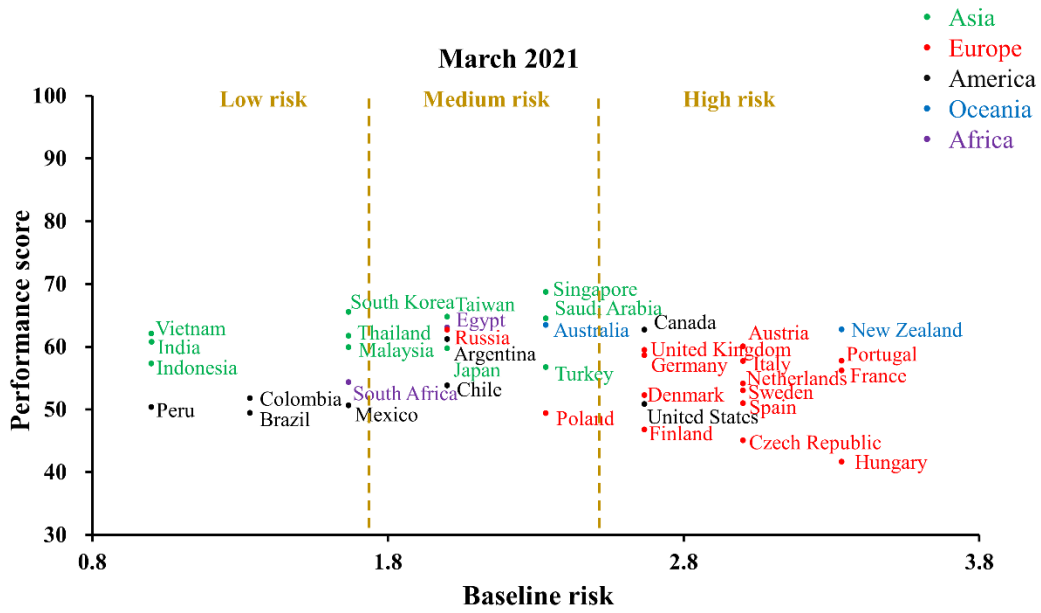

Note: some places might not be included due to missing data.

**Supplementary Figure S24. Different baseline risk levels of 50 countries and territories and their respective COVID-19 containment scores (with Google Trends) in April 2021**

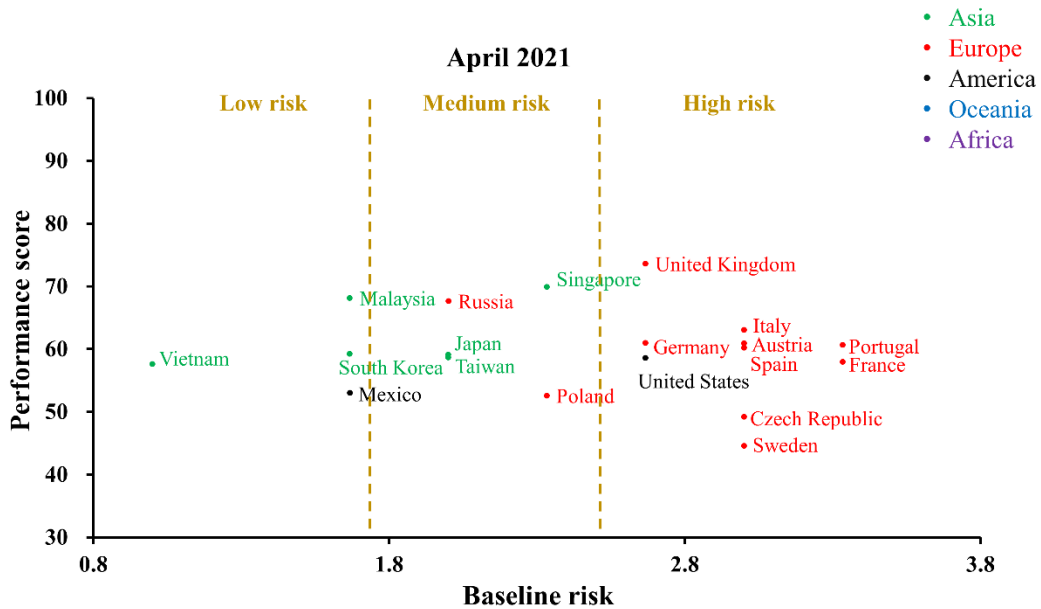

Note: some places might not be included due to missing data.

**Supplementary Figure S25. Different baseline risk levels of 50 countries and territories and their respective COVID-19 containment scores (with Google Trends) in May 2021**

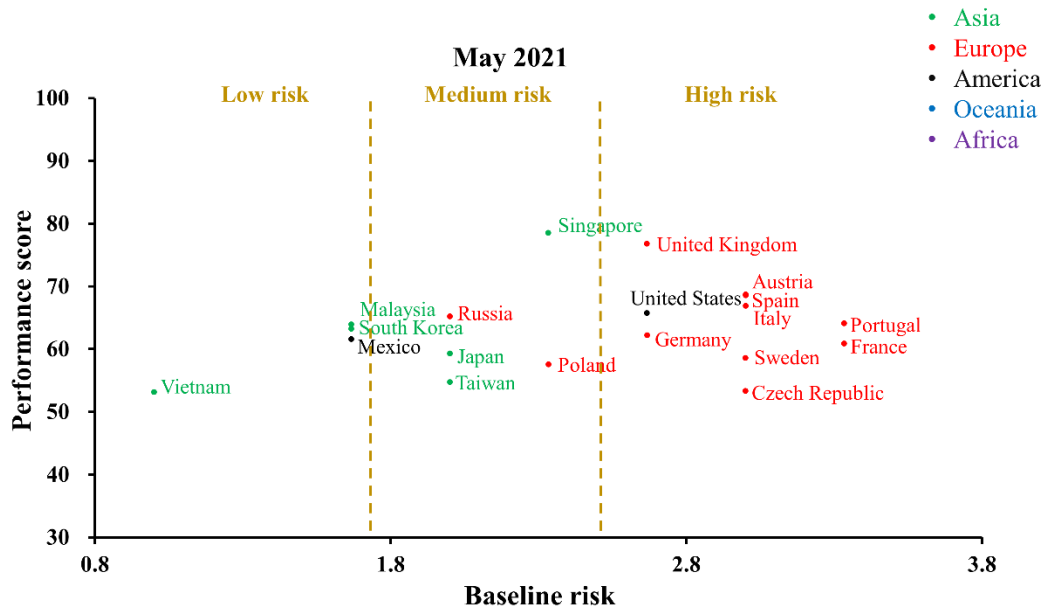

Note: some places might not be included due to missing data.

**Supplementary Figure S26. Different baseline risk levels of 50 countries and territories and their respective COVID-19 containment scores (with Google Trends) in June 2021**

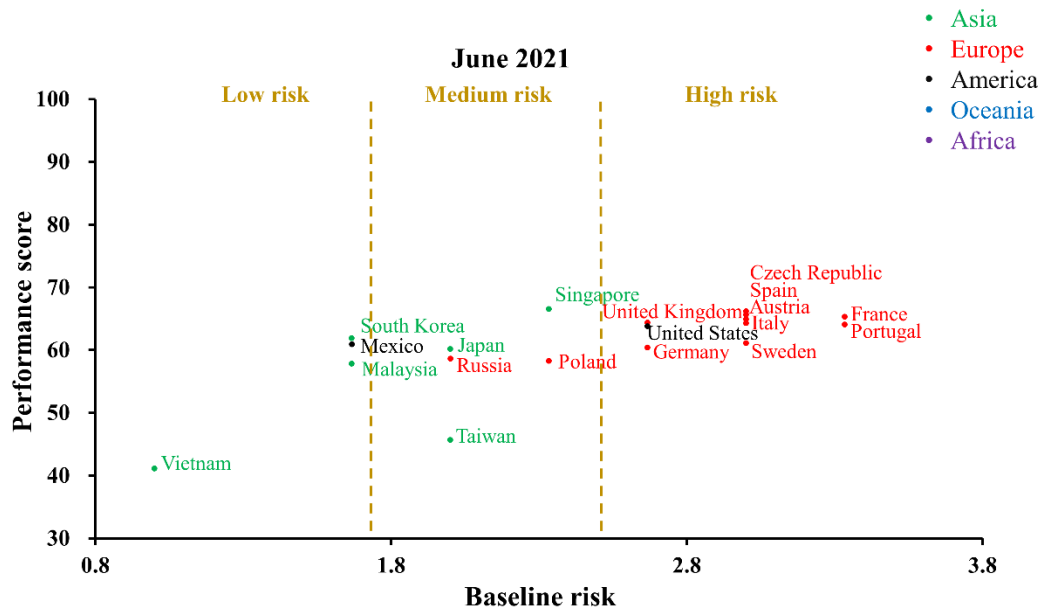

Note: some places might not be included due to missing data.

**Supplementary Figure S27. Different baseline risk levels of 50 countries and territories and their respective COVID-19 containment scores (with Google Trends) in July 2021**

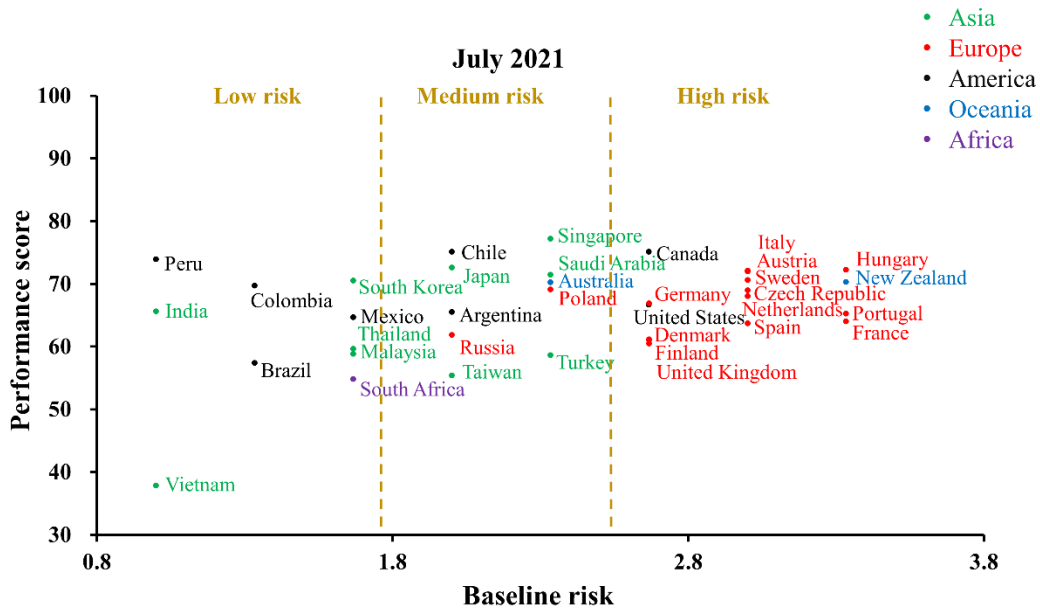

Note: some places might not be included due to missing data.

**Supplementary Figure S28. Different baseline risk levels of 50 countries and territories and their respective COVID-19 containment scores (with Google Trends) in August 2021**

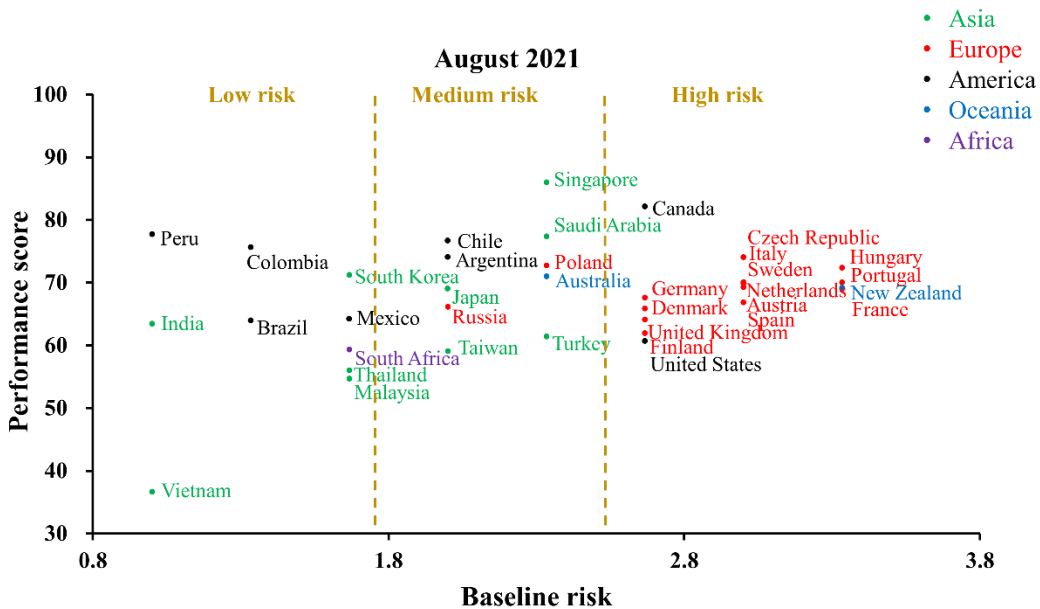

Note: some places might not be included due to missing data.

**Supplementary Figure S29. Different baseline risk levels of 50 countries and territories and their respective COVID-19 containment scores (with Google Trends) in September 2021**

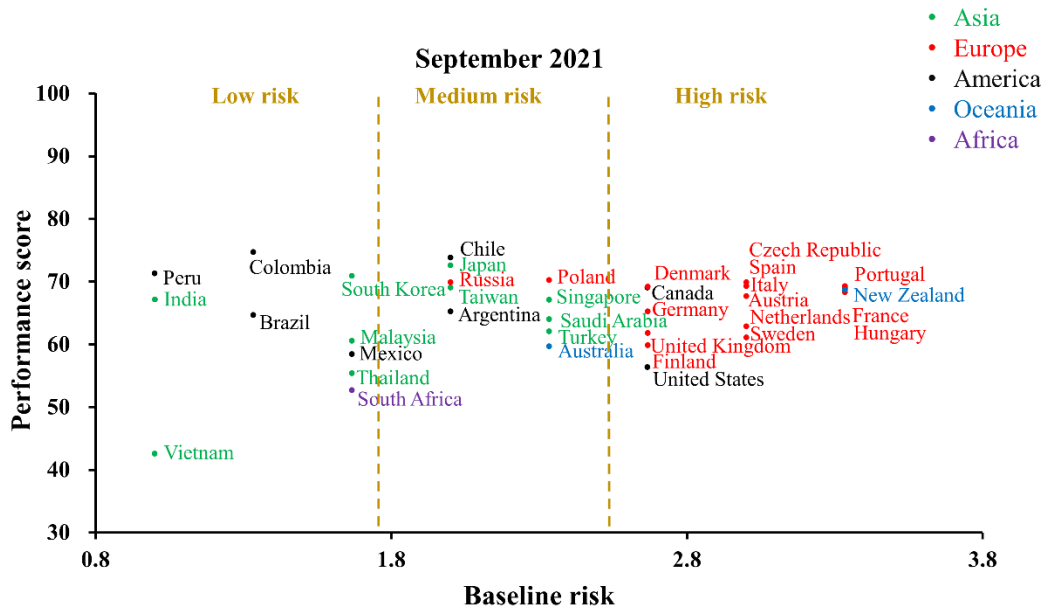

Note: some places might not be included due to missing data.

**Supplementary Figure S30. Different baseline risk levels of 50 countries and territories and their respective COVID-19 containment scores (with Google Trends) in October 2021**

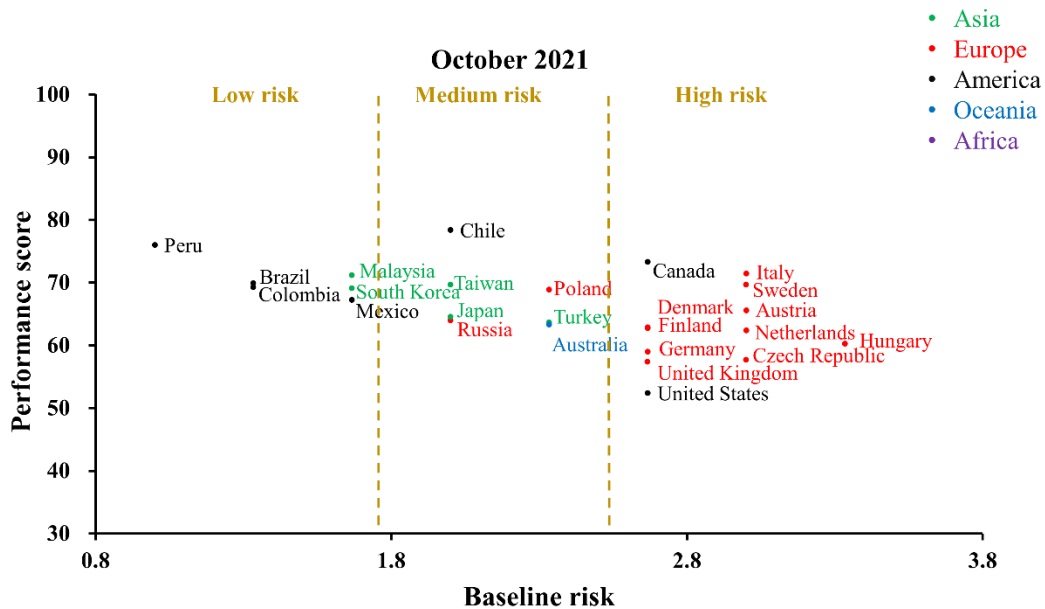

Note: some places might not be included due to missing data.

**Supplementary Figure S31. Different baseline risk levels of 50 countries and territories and their respective COVID-19 containment scores (with Google Trends) in November 2021**

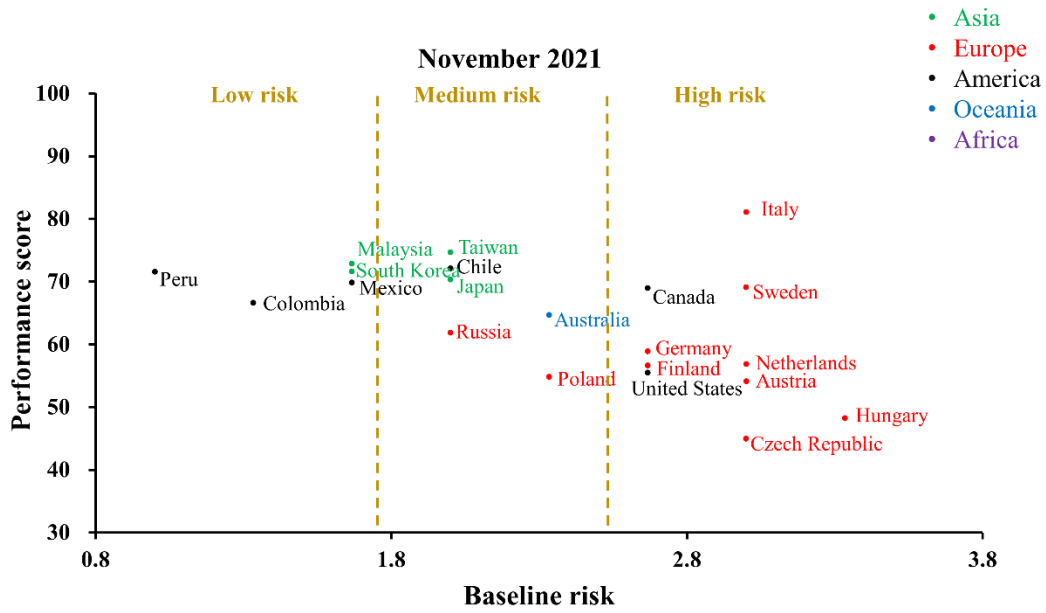

Note: some places might not be included due to missing data.

**Supplementary Figure S32a. The comparison of performance scores among three levels of baseline risk from March 2020 to November 2021, with vaccination indicator only from December 2020 to November 2021 (marked light blue area).**

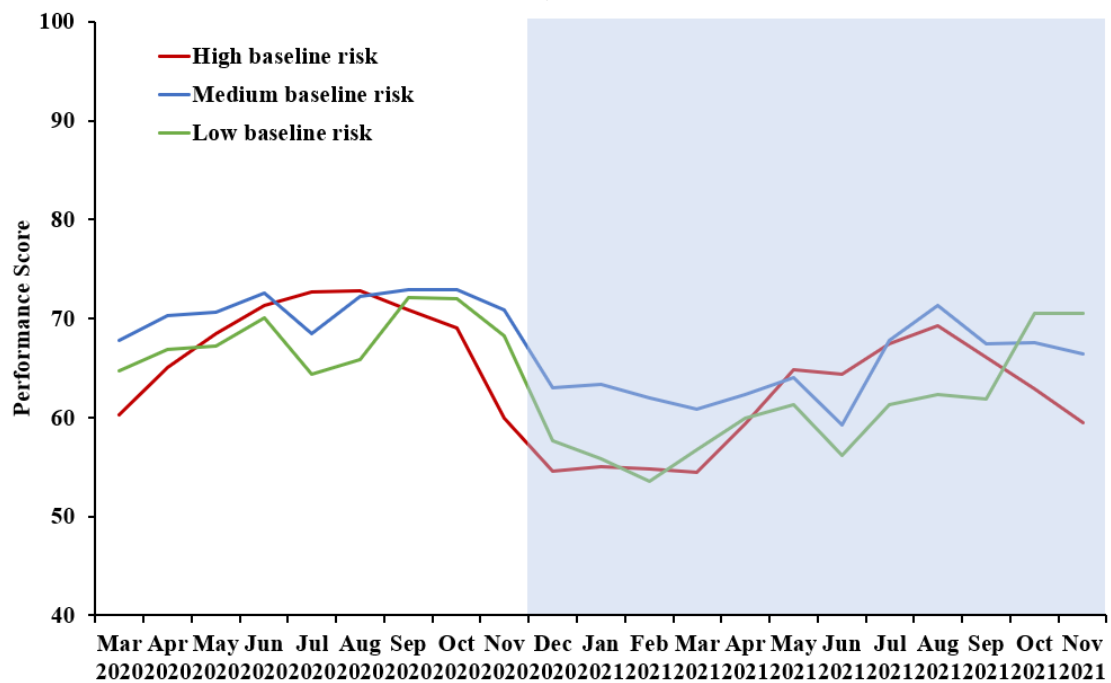

*Supplementary Figure S32b.* The comparison of people covered by vaccines among three levels of baseline risk from December 2020 to November 2021

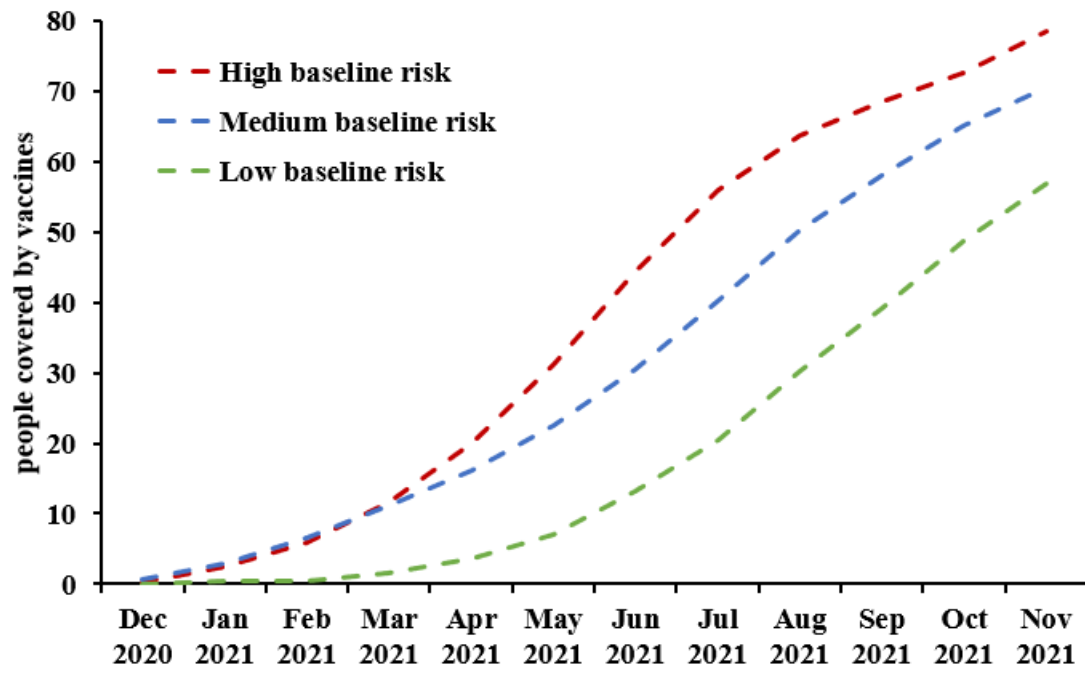

## **Supplementary Information 10. Two-sample t-test and Mann-Whitney U test of comparison between Latin American and non-Latin American nations**

To compare the COVID-19 performance between Latin American nations and non-Latin American countries, we perform two-sample t-test and Mann–Whitney U test. The analyses of the differences in performance score with/without Google Trends show that non-Latin American nations have better overall COVID-19 containment performance than Latin American countries (Supplementary Table S8). From April 2020 to September 2020, the differences in performance score without Google Trends between the two groups of countries reached statistical significance ( $P < 0.003$ ). Similarly, the differences in performance score with Google Trends reached statistical significance during the months April 2020 through October 2020 ( $P < 0.027$ ).

In addition, we examine the differences between Latin American nations and non-Latin American countries in each of the government policy & hygiene education measurements (Supplementary Table S9). There is no statistically significant difference in lockdown efficiency between the two groups in the nine-month period. In terms of differences in health-system policies, non-Latin American nations performed better than their Latin American counterparts in March 2020 ( $P = 0.005$ ). We did not observe statistically significant differences in health-system policies between the two groups in other periods. The analysis of the differences in health literacy shows that except in April 2020 and June 2020, when Latin American nations performed statistically better than others ( $P < 0.032$ ), there are no statistically significant differences between the two groups in other months.

To uncover the influence of COVID-19 pandemic on the society, economy, and citizens' mental health, we compare the differences in six vital health and socioeconomic indicators between Latin American nations and non-Latin American countries (Supplementary Table S10).

The differences between Latin American nations and others in three key COVID-19 outcome-based indicators are analyzed (Supplementary Table S10). In the beginning of the pandemic (in March 2020 and April 2020), Latin American nations have lower one-month cases per 100,000 members of the populations than others, but these differences do not meet the statistical significance. From May 2020 to September 2020, Latin American nations have higher one-month cases per 100,000 members of the population than their non-Latin American peers ( $P < 0.027$ ). However, in October 2020 and November 2020, there are no statistical differences between the two groups in one-month cases per 100,000 members of the population. In terms of the differences in infection growth rate, Latin American countries have higher infection growth rates than non-Latin American nations during the months from March 2020 to August 2020; except in March 2020 and August 2020, the differences in other months reach the statistical significance ( $P < 0.011$ ). However, from September 2020 to November 2020, the

difference between the two groups of countries was not statistically significant. There are no significant differences between the Latin American nations and others in respect to one-month case fatality rate from March 2020 to June 2020; however, from July 2020 to November 2020, Latin American countries have higher one-month case fatality rate than non-Latin American nations ( $P < 0.008$ ).

Our analysis discovers that non-Latin American nations performed better than Latin American countries in two economic indicators (Supplementary Table S10). From April 2020 to September 2020, non-Latin nations have lower GDP loss than Latin American states ( $P < 0.02$ ). Similarly, from April 2020 to November 2020, the increase in unemployment rate in non-Latin American countries was lower than that in Latin American states. The difference between the two groups reached statistical significance from June 2020 to August 2020 and October 2020 to November 2020 ( $P < 0.007$ ).

The comparison of the impact of the pandemic on citizens' mental health between Latin American nations and others is measured by the difference in searches for insomnia between the two groups in the nine-month period (Supplementary Table S10). From April 2020 to June 2020, the increase in Google searches for "insomnia" in Latin America nations was higher than their counterparts ( $P < 0.027$ ), while the difference between the two groups of nations in other periods was not significant.



**Supplementary Table S8. Comparison of the overall containment effectiveness between Latin American and non-Latin American countries from March to November 2020**

|                                                | Mar 2020 |                  | Apr 2020 |                  | May 2020 |                  | Jun 2020 |                  | Jul 2020 |                  | Aug 2020 |                  | Sep 2020 |                  | Oct 2020 |                    | Nov 2020 |                    |  |
|------------------------------------------------|----------|------------------|----------|------------------|----------|------------------|----------|------------------|----------|------------------|----------|------------------|----------|------------------|----------|--------------------|----------|--------------------|--|
|                                                | N        | Mean<br>(SD)     | N        | Mean<br>(SD)     | N        | Mean<br>(SD)     | N        | Mean<br>(SD)     | N        | Mean<br>(SD)     | N        | Mean<br>(SD)     | N        | Mean<br>(SD)     | N        | Mean<br>(SD)       | N        | Mean<br>(SD)       |  |
|                                                |          | Median<br>(IQR)  |          | Median<br>(IQR)  |          | Median<br>(IQR)  |          | Median<br>(IQR)  |          | Median<br>(IQR)  |          | Median<br>(IQR)  |          | Median<br>(IQR)  |          | Median<br>(IQR)    |          | Median<br>(IQR)    |  |
| <b>Performance score without Google Trends</b> |          |                  |          |                  |          |                  |          |                  |          |                  |          |                  |          |                  |          |                    |          |                    |  |
| Latin America                                  | 3        | 64.92<br>(10.39) | 6        | 54.09<br>(4.87)  | 6        | 53.13<br>(4.21)  | 6        | 48.97<br>(5.79)  | 6        | 46.15<br>(4.40)  | 6        | 46.90<br>(4.41)  | 6        | 49.09<br>(5.57)  | 6        | 57.42<br>(6.22)    | 6        | 59.52<br>(5.25)    |  |
|                                                |          | 62.86<br>(20.48) |          | 54.29<br>(1.67)  |          | 53.45<br>(3.57)  |          | 47.14<br>(5.24)  |          | 44.05<br>(7.14)  |          | 47.14<br>(8.81)  |          | 48.10<br>(7.14)  |          | 60.12<br>(9.76)    |          | 60.60<br>(3.57)    |  |
| Non-Latin America                              | 34       | 60.94<br>(12.29) | 41       | 63.61<br>(12.82) | 41       | 66.98<br>(12.83) | 41       | 69.78<br>(12.98) | 40       | 70.81<br>(12.85) | 40       | 68.69<br>(11.94) | 40       | 68.79<br>(11.87) | 40       | 67.50<br>(15.11)   | 40       | 67.57<br>(15.57)   |  |
|                                                |          | 59.17<br>(21.43) |          | 61.19<br>(15.24) |          | 66.90<br>(15.95) |          | 71.19<br>(16.90) |          | 68.57<br>(21.90) |          | 68.10<br>(14.76) |          | 66.43<br>(16.43) |          | 61.90<br>(24.64)   |          | 62.38<br>(28.21)   |  |
| <i>P</i> value <sup>a</sup>                    |          | 0.591            |          | <b>0.003</b>     |          | <b>&lt;.0001</b> |          | <b>0.0004</b>    |          | <b>&lt;.0001</b> |          | <b>&lt;.0001</b> |          | <b>0.0003</b>    |          | 0.221 <sup>b</sup> |          | 0.525 <sup>b</sup> |  |
| <b>Performance score with Google Trends</b>    |          |                  |          |                  |          |                  |          |                  |          |                  |          |                  |          |                  |          |                    |          |                    |  |
| Latin America                                  | 3        | 66.23<br>(4.83)  | 6        | 56.42<br>(3.78)  | 6        | 55.68<br>(2.91)  | 6        | 54.06<br>(2.91)  | 6        | 52.79<br>(4.60)  | 6        | 53.38<br>(3.05)  | 6        | 55.54<br>(4.80)  | 6        | 60.40<br>(4.66)    | 6        | 64.58<br>(4.70)    |  |
|                                                |          | 64.17<br>(8.98)  |          | 57.78<br>(2.69)  |          | 54.72<br>(4.26)  |          | 54.07<br>(2.78)  |          | 52.69<br>(6.20)  |          | 51.99<br>(2.78)  |          | 55.42<br>(6.48)  |          | 62.08<br>(7.78)    |          | 66.57<br>(6.94)    |  |

|                             |    |                  |    |                          |    |                  |    |                  |    |                           |    |                  |    |                  |    |                  |    |                    |
|-----------------------------|----|------------------|----|--------------------------|----|------------------|----|------------------|----|---------------------------|----|------------------|----|------------------|----|------------------|----|--------------------|
| Non-Latin America           | 27 | 64.65<br>(9.74)  | 34 | 65.13<br>(10.20)         | 34 | 67.95<br>(9.93)  | 34 | 71.20<br>(10.31) | 33 | 72.60<br>(10.18)          | 33 | 70.63<br>(10.10) | 33 | 71.19<br>(10.09) | 33 | 70.75<br>(12.19) | 33 | 70.79<br>(12.23)   |
|                             |    | 63.61<br>(15.93) |    | 64.81<br>(14.72)         |    | 67.59<br>(9.07)  |    | 70.05<br>(13.89) |    | 71.39<br>(16.67)          |    | 69.26<br>(15.93) |    | 68.70<br>(11.67) |    | 70.09<br>(18.06) |    | 67.31<br>(21.57)   |
| <i>P</i> value <sup>a</sup> |    | 0.786            |    | <b>0.027<sup>b</sup></b> |    | <b>&lt;.0001</b> |    | <b>&lt;.0001</b> |    | <b>0.0002<sup>b</sup></b> |    | <b>&lt;.0001</b> |    | <b>0.001</b>     |    | <b>0.002</b>     |    | 0.371 <sup>b</sup> |

<sup>a</sup>Unless otherwise noted, the two-sample t test is used to compare the differences between Latin American and non-Latin American countries

<sup>b</sup>The Mann-Whitney U test is used to compare the differences between Latin American and non-Latin American countries

**Supplementary Table S9. Comparison of government policy & hygiene education indicators between Latin American and non-Latin American countries from March 2020 to November 2020**

|                               | Mar 2020 |                 | Apr 2020 |                 | May 2020 |                 | Jun 2020 |                 | Jul 2020 |                 | Aug 2020 |                 | Sep 2020 |                 | Oct 2020 |                 | Nov 2020 |                 |
|-------------------------------|----------|-----------------|----------|-----------------|----------|-----------------|----------|-----------------|----------|-----------------|----------|-----------------|----------|-----------------|----------|-----------------|----------|-----------------|
|                               | N        | Mean<br>(SD)    | N        | Mean<br>(SD)    | N        | Mean<br>(SD)    | N        | Mean<br>(SD)    | N        | Mean<br>(SD)    | N        | Mean<br>(SD)    | N        | Mean<br>(SD)    | N        | Mean<br>(SD)    | N        | Mean<br>(SD)    |
|                               |          | Median<br>(IQR) |          | Median<br>(IQR) |          | Median<br>(IQR) |          | Median<br>(IQR) |          | Median<br>(IQR) |          | Median<br>(IQR) |          | Median<br>(IQR) |          | Median<br>(IQR) |          | Median<br>(IQR) |
| <b>Lockdown efficiency</b>    |          |                 |          |                 |          |                 |          |                 |          |                 |          |                 |          |                 |          |                 |          |                 |
| Latin America                 | 3        | 3.33<br>(1.15)  | 6        | 2.00<br>(0.63)  | 6        | 2.83<br>(0.41)  | 6        | 3.00<br>(0.00)  | 6        | 3.00<br>(0.00)  | 6        | 3.00<br>(0.00)  | 6        | 3.00<br>(0.00)  | 6        | 2.83<br>(0.41)  | 6        | 2.17<br>(0.75)  |
|                               |          | 4.00<br>(2.00)  |          | 2.00<br>(0.00)  |          | 3.00<br>(0.00)  |          | 3.00<br>(0.00)  |          | 3.00<br>(0.00)  |          | 3.00<br>(0.00)  |          | 3.00<br>(0.00)  |          | 3.00<br>(0.00)  |          | 2.00<br>(1.00)  |
| Non-Latin America             | 34       | 2.44<br>(1.11)  | 41       | 2.29<br>(1.17)  | 41       | 2.76<br>(1.18)  | 41       | 3.10<br>(1.04)  | 40       | 3.00<br>(1.11)  | 40       | 2.58<br>(1.20)  | 40       | 2.58<br>(1.20)  | 40       | 2.65<br>(1.17)  | 40       | 2.78<br>(1.12)  |
|                               |          | 3.00<br>(2.00)  |          | 2.00<br>(2.00)  |          | 3.00<br>(2.00)  |          | 3.00<br>(1.00)  |          | 3.00<br>(2.00)  |          | 2.50<br>(2.50)  |          | 2.50<br>(2.50)  |          | 3.00<br>(2.00)  |          | 3.00<br>(2.00)  |
| <i>P</i> value <sup>a</sup>   |          | 0.183           |          | 0.703           |          | 0.868           |          | 0.367           |          | 0.546           |          | 0.489           |          | 0.489           |          | 0.853           |          | 0.160           |
| <b>Health-system policies</b> |          |                 |          |                 |          |                 |          |                 |          |                 |          |                 |          |                 |          |                 |          |                 |
| Latin America                 | 3        | 1.51<br>(0.15)  | 6        | 2.98<br>(0.59)  | 6        | 3.38<br>(0.28)  | 6        | 3.38<br>(0.28)  | 6        | 3.42<br>(0.26)  | 6        | 3.47<br>(0.29)  | 6        | 3.24<br>(0.49)  | 6        | 3.24<br>(0.46)  | 6        | 3.33<br>(0.28)  |
|                               |          | 1.60<br>(0.27)  |          | 3.20<br>(0.80)  |          | 3.20<br>(0.53)  |          | 3.20<br>(0.53)  |          | 3.33<br>(0.53)  |          | 3.47<br>(0.53)  |          | 3.20<br>(0.53)  |          | 3.33<br>(0.27)  |          | 3.33<br>(0.27)  |

|                             |    |                |    |                |    |                |    |                |    |                |    |                |    |                |    |                |    |                |
|-----------------------------|----|----------------|----|----------------|----|----------------|----|----------------|----|----------------|----|----------------|----|----------------|----|----------------|----|----------------|
| Non-Latin America           | 34 | 2.42<br>(0.41) | 41 | 2.71<br>(0.54) | 41 | 3.00<br>(0.50) | 41 | 3.15<br>(0.41) | 40 | 3.23<br>(0.35) | 40 | 3.33<br>(0.36) | 40 | 3.36<br>(0.34) | 40 | 3.40<br>(0.37) | 40 | 3.42<br>(0.39) |
|                             |    | 2.40<br>(0.53) |    | 2.67<br>(1.07) |    | 2.93<br>(0.80) |    | 3.20<br>(0.53) |    | 3.20<br>(0.40) |    | 3.47<br>(0.27) |    | 3.47<br>(0.27) |    | 3.47<br>(0.53) |    | 3.47<br>(0.53) |
| <i>P</i> value <sup>a</sup> |    | <b>0.005</b>   |    | 0.292          |    | 0.058          |    | 0.228          |    | 0.236          |    | 0.430          |    | 0.588          |    | 0.449          |    | 0.462          |

**Health literacy**

|                             |    |                  |    |                  |    |                  |    |                  |    |                    |    |                  |    |                  |    |                    |    |                    |
|-----------------------------|----|------------------|----|------------------|----|------------------|----|------------------|----|--------------------|----|------------------|----|------------------|----|--------------------|----|--------------------|
| Latin America               | 3  | 48.07<br>(2.57)  | 6  | 51.04<br>(16.40) | 6  | 34.67<br>(15.12) | 6  | 27.77<br>(10.99) | 6  | 21.98<br>(10.15)   | 6  | 19.42<br>(7.05)  | 6  | 20.82<br>(10.06) | 6  | 15.44<br>(6.71)    | 6  | 13.85<br>(4.58)    |
|                             |    | 47.40<br>(5.00)  |    | 46.75<br>(12.25) |    | 29.69<br>(25.00) |    | 28.05<br>(13.00) |    | 22.06<br>(13.75)   |    | 18.75<br>(10.63) |    | 20.95<br>(10.80) |    | 13.88<br>(11.50)   |    | 14.31<br>(5.88)    |
| Non-Latin America           | 27 | 43.68<br>(17.88) | 34 | 33.84<br>(16.70) | 34 | 25.64<br>(11.47) | 34 | 18.28<br>(9.42)  | 33 | 19.73<br>(11.74)   | 33 | 18.03<br>(8.88)  | 33 | 16.68<br>(6.57)  | 33 | 18.36<br>(10.33)   | 33 | 14.45<br>(9.54)    |
|                             |    | 43.90<br>(33.50) |    | 30.31<br>(29.50) |    | 24.00<br>(15.63) |    | 19.70<br>(15.20) |    | 16.00<br>(16.63)   |    | 17.25<br>(12.25) |    | 17.20<br>(5.70)  |    | 17.50<br>(12.25)   |    | 12.75<br>(8.50)    |
| <i>P</i> value <sup>b</sup> |    | 0.252            |    | <b>0.025</b>     |    | 0.098            |    | <b>0.032</b>     |    | 0.546 <sup>a</sup> |    | 0.720            |    | 0.200            |    | 0.586 <sup>a</sup> |    | 0.770 <sup>a</sup> |

<sup>a</sup>The Mann-Whitney U test is used to compare the differences between Latin American and non-Latin American countries

<sup>b</sup>Unless otherwise noted, the two-sample t test is used to compare the differences between Latin American and non-Latin American countries

**Supplementary Table S10. Comparison of vital health & socioeconomic indicators between Latin American and non-Latin American countries from March 2020 to November 2020**

|                                                              | Mar 2020 |                          | Apr 2020 |                      | May 2020 |                    | Jun 2020 |                    | Jul 2020 |                    | Aug 2020 |                    | Sep 2020 |                    | Oct 2020 |                    | Nov 2020 |                     |
|--------------------------------------------------------------|----------|--------------------------|----------|----------------------|----------|--------------------|----------|--------------------|----------|--------------------|----------|--------------------|----------|--------------------|----------|--------------------|----------|---------------------|
|                                                              | N        | Mean<br>(SD)             | N        | Mean<br>(SD)         | N        | Mean<br>(SD)       | N        | Mean<br>(SD)       | N        | Mean<br>(SD)       | N        | Mean<br>(SD)       | N        | Mean<br>(SD)       | N        | Mean<br>(SD)       | N        | Mean<br>(SD)        |
|                                                              |          | Median<br>(IQR)          |          | Median<br>(IQR)      |          | Median<br>(IQR)    |          | Median<br>(IQR)    |          | Median<br>(IQR)    |          | Median<br>(IQR)    |          | Median<br>(IQR)    |          | Median<br>(IQR)    |          | Median<br>(IQR)     |
| <b>One-month cases per 100,000 members of the population</b> |          |                          |          |                      |          |                    |          |                    |          |                    |          |                    |          |                    |          |                    |          |                     |
| <b>Latin America</b>                                         | 3        | 6.16<br>(7.59)           | 6        | 42.90<br>(41.72)     | 6        | 211.58<br>(216.27) | 6        | 323.98<br>(276.91) | 6        | 364.30<br>(145.18) | 6        | 478.50<br>(222.72) | 6        | 410.43<br>(212.02) | 6        | 399.68<br>(278.74) | 6        | 329.28<br>(171.86)  |
|                                                              |          | 2.69<br>(13.93)          |          | 26.15<br>(66.72)     |          | 128.30<br>(341.74) |          | 250.37<br>(311.89) |          | 379.66<br>(118.51) |          | 543.55<br>(334.83) |          | 423.19<br>(231.04) |          | 304.53<br>(233.27) |          | 296.76<br>(287.72)  |
| <b>Non-Latin America</b>                                     | 34       | 48.07<br>(56.27)         | 41       | 101.08<br>(110.80)   | 41       | 88.02<br>(238.61)  | 41       | 82.69<br>(219.74)  | 40       | 79.17<br>(147.98)  | 40       | 86.72<br>(115.94)  | 40       | 159.20<br>(262.48) | 40       | 447.84<br>(621.46) | 40       | 608.69<br>(659.54)  |
|                                                              |          | 24.04<br>(71.59)         |          | 60.87<br>(156.19)    |          | 24.35<br>(67.13)   |          | 18.97<br>(37.62)   |          | 29.34<br>(63.38)   |          | 55.82<br>(88.43)   |          | 79.01<br>(180.91)  |          | 200.62<br>(646.37) |          | 302.10<br>(1204.00) |
| <i>P</i> value <sup>a</sup>                                  |          | 0.211                    |          | 0.493                |          | <b>0.027</b>       |          | <b>0.002</b>       |          | <b>0.001</b>       |          | <b>0.0004</b>      |          | <b>0.004</b>       |          | 0.406              |          | 0.935               |
| <b>Infection growth rate</b>                                 |          |                          |          |                      |          |                    |          |                    |          |                    |          |                    |          |                    |          |                    |          |                     |
| <b>Latin America</b>                                         | 3        | 152708.33<br>(128067.45) | 6        | 1289.99<br>(1128.78) | 6        | 406.17<br>(116.28) | 6        | 172.86<br>(75.31)  | 6        | 107.73<br>(75.03)  | 6        | 64.85<br>(40.18)   | 6        | 33.27<br>(23.88)   | 6        | 24.24<br>(17.07)   | 6        | 15.76<br>(7.01)     |
|                                                              |          | 142100.00<br>(255475.00) |          | 1021.63<br>(959.79)  |          | 361.59<br>(145.69) |          | 160.85<br>(106.86) |          | 88.86<br>(153.58)  |          | 52.80<br>(66.95)   |          | 24.70<br>(11.79)   |          | 19.76<br>(18.58)   |          | 17.42<br>(13.95)    |

|                                     |    |             |    |              |    |               |    |              |    |              |    |              |    |              |    |              |    |              |
|-------------------------------------|----|-------------|----|--------------|----|---------------|----|--------------|----|--------------|----|--------------|----|--------------|----|--------------|----|--------------|
| <b>Non-Latin America</b>            | 34 | 120073.24   | 41 | 502.37       | 41 | 81.13         | 41 | 41.92        | 40 | 42.61        | 40 | 34.50        | 40 | 41.44        | 40 | 76.97        | 40 | 57.71        |
|                                     |    | (247829.01) |    | (810.08)     |    | (125.43)      |    | (70.23)      |    | (60.22)      |    | (34.62)      |    | (59.60)      |    | (89.66)      |    | (53.45)      |
|                                     |    | 49672.30    |    | 236.49       |    | 21.48         |    | 11.13        |    | 14.48        |    | 21.85        |    | 22.64        |    | 41.07        |    | 47.87        |
|                                     |    | (85905.00)  |    | (436.25)     |    | (66.78)       |    | (40.71)      |    | (34.35)      |    | (36.62)      |    | (45.49)      |    | (111.28)     |    | (72.90)      |
| <i>P</i> value <sup>a</sup>         |    | 0.278       |    | <b>0.011</b> |    | <b>0.0004</b> |    | <b>0.001</b> |    | <b>0.011</b> |    | 0.052        |    | 0.525        |    | 0.320        |    | 0.100        |
| <b>One-month case fatality rate</b> |    |             |    |              |    |               |    |              |    |              |    |              |    |              |    |              |    |              |
| <b>Latin America</b>                | 3  | 2.11        | 6  | 5.36         | 6  | 4.27          | 6  | 4.83         | 6  | 4.98         | 6  | 4.17         | 6  | 3.70         | 6  | 3.48         | 6  | 3.29         |
|                                     |    | (1.57)      |    | (3.10)       |    | (3.75)        |    | (4.18)       |    | (3.04)       |    | (2.99)       |    | (2.72)       |    | (2.16)       |    | (2.13)       |
|                                     |    | 2.39        |    | 5.30         |    | 2.77          |    | 3.46         |    | 4.18         |    | 3.13         |    | 2.67         |    | 2.69         |    | 2.66         |
|                                     |    | (3.09)      |    | (4.28)       |    | (2.87)        |    | (1.31)       |    | (5.03)       |    | (1.75)       |    | (0.47)       |    | (1.18)       |    | (0.75)       |
| <b>Non-Latin America</b>            | 34 | 3.56        | 41 | 8.86         | 41 | 7.19          | 41 | 4.19         | 40 | 1.60         | 40 | 1.56         | 40 | 2.03         | 40 | 1.27         | 40 | 1.40         |
|                                     |    | (4.22)      |    | (15.22)      |    | (6.14)        |    | (5.07)       |    | (1.58)       |    | (2.32)       |    | (3.41)       |    | (1.64)       |    | (1.19)       |
|                                     |    | 2.20        |    | 5.78         |    | 5.30          |    | 2.82         |    | 1.30         |    | 0.92         |    | 0.79         |    | 0.77         |    | 1.24         |
|                                     |    | (4.79)      |    | (6.49)       |    | (7.87)        |    | (3.14)       |    | (1.31)       |    | (1.15)       |    | (1.57)       |    | (1.04)       |    | (1.43)       |
| <i>P</i> value <sup>a</sup>         |    | 0.889       |    | 0.714        |    | 0.315         |    | 0.364        |    | <b>0.002</b> |    | <b>0.003</b> |    | <b>0.008</b> |    | <b>0.003</b> |    | <b>0.006</b> |
| <b>GDP loss</b>                     |    |             |    |              |    |               |    |              |    |              |    |              |    |              |    |              |    |              |
| <b>Latin America</b>                | 3  | -1.67       | 6  | -19.25       | 6  | -19.25        | 6  | -19.25       | 6  | -9.72        | 6  | -9.72        | 6  | -9.72        | 6  | -3.02        | 6  | -3.02        |
|                                     |    | (0.86)      |    | (6.43)       |    | (6.43)        |    | (6.43)       |    | (2.87)       |    | (2.87)       |    | (2.87)       |    | (2.85)       |    | (2.85)       |
|                                     |    | -1.50       |    | -18.30       |    | -18.30        |    | -18.30       |    | -10.10       |    | -10.10       |    | -10.10       |    | -3.40        |    | -3.40        |
|                                     |    | (1.70)      |    | (3.60)       |    | (3.60)        |    | (3.60)       |    | (3.90)       |    | (3.90)       |    | (3.90)       |    | (1.10)       |    | (1.10)       |
| <b>Non-Latin America</b>            | 34 | -2.51       | 41 | -12.54       | 41 | -12.54        | 41 | -12.54       | 40 | -5.41        | 40 | -5.41        | 40 | -5.41        | 40 | -4.47        | 40 | -4.47        |
|                                     |    | (4.78)      |    | (6.38)       |    | (6.38)        |    | (6.38)       |    | (4.03)       |    | (4.03)       |    | (4.03)       |    | (3.14)       |    | (3.14)       |
|                                     |    | -2.50       |    | -11.30       |    | -11.30        |    | -11.30       |    | -5.30        |    | -5.30        |    | -5.30        |    | -3.85        |    | -3.85        |

|                             |    |  |                    |    |                |    |                |    |                |    |                |    |                |    |                    |    |                |    |                 |
|-----------------------------|----|--|--------------------|----|----------------|----|----------------|----|----------------|----|----------------|----|----------------|----|--------------------|----|----------------|----|-----------------|
|                             |    |  | (2.80)             |    | (8.30)         |    | (8.30)         |    | (8.30)         |    | (2.90)         |    | (2.90)         |    | (2.90)             |    | (3.55)         |    | (3.55)          |
| <i>P</i> value <sup>b</sup> |    |  | 0.404 <sup>a</sup> |    | <b>0.020</b>   |    | <b>0.020</b>   |    | <b>0.020</b>   |    | <b>0.016</b>   |    | <b>0.016</b>   |    | <b>0.016</b>       |    | 0.290          |    | 0.290           |
| <b>Unemployment rate</b>    |    |  |                    |    |                |    |                |    |                |    |                |    |                |    |                    |    |                |    |                 |
| <b>Latin America</b>        | 3  |  | 0.07<br>(0.81)     | 6  | 2.81<br>(3.37) | 6  | 4.18<br>(3.96) | 6  | 5.17<br>(4.09) | 6  | 5.20<br>(3.96) | 6  | 4.53<br>(3.16) | 6  | 4.57<br>(3.44)     | 6  | 4.22<br>(3.18) | 6  | 3.77<br>(2.70)  |
|                             |    |  | -0.30<br>(1.50)    |    | 1.80<br>(1.32) |    | 3.25<br>(5.74) |    | 3.70<br>(8.09) |    | 3.80<br>(7.50) |    | 3.95<br>(4.00) |    | 3.90<br>(3.60)     |    | 3.60<br>(2.80) |    | 3.35<br>(1.90)  |
| <b>Non-Latin America</b>    | 34 |  | 0.17<br>(1.23)     | 41 | 1.59<br>(3.91) | 41 | 1.79<br>(3.63) | 41 | 1.47<br>(2.70) | 40 | 1.48<br>(1.43) | 40 | 1.41<br>(1.24) | 40 | 1.32<br>(1.23)     | 40 | 1.17<br>(1.16) | 40 | 1.09<br>(1.11)  |
|                             |    |  | 0.05<br>(0.79)     |    | 0.60<br>(1.60) |    | 0.90<br>(1.60) |    | 1.10<br>(1.57) |    | 1.10<br>(1.15) |    | 1.20<br>(1.05) |    | 1.10<br>(1.05)     |    | 1.05<br>(1.10) |    | 0.95<br>(1.10)  |
| <i>P</i> value <sup>a</sup> |    |  | 0.636              |    | 0.101          |    | 0.067          |    | <b>0.007</b>   |    | <b>0.003</b>   |    | <b>0.003</b>   |    | 0.069 <sup>b</sup> |    | <b>0.003</b>   |    | <b>0.003</b>    |
| <b>Insomnia</b>             |    |  |                    |    |                |    |                |    |                |    |                |    |                |    |                    |    |                |    |                 |
| <b>Latin America</b>        | 3  |  | 1.00<br>(1.00)     | 6  | 3.00<br>(1.10) | 6  | 2.33<br>(1.37) | 6  | 1.67<br>(1.63) | 6  | 0.83<br>(1.33) | 6  | 0.67<br>(1.63) | 6  | 0.17<br>(0.98)     | 6  | 0.67<br>(0.82) | 6  | -0.17<br>(0.41) |
|                             |    |  | 1.00<br>(2.00)     |    | 3.00<br>(1.00) |    | 2.50<br>(1.00) |    | 1.50<br>(3.00) |    | 0.00<br>(2.00) |    | 0.00<br>(0.00) |    | 0.00<br>(0.00)     |    | 0.50<br>(1.00) |    | 0.00<br>(0.00)  |
| <b>Non-Latin America</b>    | 27 |  | 0.26<br>(1.16)     | 34 | 0.91<br>(1.24) | 34 | 0.74<br>(1.19) | 34 | 0.32<br>(0.77) | 33 | 0.36<br>(0.82) | 33 | 0.39<br>(1.00) | 33 | 0.39<br>(1.14)     | 33 | 0.18<br>(1.04) | 33 | 0.15<br>(0.76)  |
|                             |    |  | 0.00<br>(1.00)     |    | 0.50<br>(2.00) |    | 0.00<br>(2.00) |    | 0.00<br>(1.00) |    | 0.00<br>(1.00) |    | 0.00<br>(0.00) |    | 0.00<br>(1.00)     |    | 0.00<br>(0.00) |    | 0.00<br>(0.00)  |
| <i>P</i> value <sup>a</sup> |    |  | 0.240              |    | <b>0.002</b>   |    | <b>0.009</b>   |    | <b>0.027</b>   |    | 0.519          |    | 0.979          |    | 0.500              |    | 0.130          |    | 0.238           |

<sup>a</sup>The Mann-Whitney U test is used to compare the differences between Latin American and non-Latin American countries.

<sup>b</sup>Unless otherwise noted, the two-sample t test is used to compare the differences between Latin American and non-Latin American countries.



## **Supplementary Information 11. Two-sample t-test and Mann-Whitney U test of government actions and COVID-19 containment effectiveness for Asian and non-Asian nations and territories**

Both lockdown efficiency and health-system policies are indicators of government actions against COVID-19. For the early stages of the pandemic (from March 2020 to May 2020), Asian nations and territories performed better than non-Asian ones in lockdown efficiency (Supplementary Table S11). In particular, the difference in lockdown efficiency in April between Asian and non-Asian nations and territories reached statistical significance ( $P = 0.007$ ). In October 2020, Asian nations and territories also showed better performance of lockdown efficiency than non-Asian nations and territories ( $P = 0.027$ ).

Another indicator of government action is health-system policies. Health-system policies include public information campaigns, testing policy, contact-tracing, and mask-wearing policy. Asian nations and territories performed better than their non-Asian peers in health system policies throughout the nine-month period (Supplementary Table S11). Particularly in both March 2020 and April 2020, the differences in health-system policies between Asian nations and territories and non-Asian countries reached statistical significance ( $P < 0.003$ ). From the analyses of lockdown efficiency and health-system policies, we determine that Asian governments were able to enact appropriate lockdown measures and health-system policies in the early stages of the pandemic.

Utilizing the performance score with/without Google Trends, we evaluate the difference in containment effectiveness between Asian and non-Asian countries and territories (Supplementary Table S12). It is observed that Asian countries and territories perform better than non-Asian nations in performance score with/without Google Trends. From March 2020 to November 2020, in addition to the performance score without Google Trends in July 2020, both the differences of the performance score with/without Google Trends between Asian and non-Asian countries and territories reached statistical significance ( $P < 0.039$ ).

**Supplementary Table S11. Comparison of government actions between Asian and non-Asian nations and territories from March 2020 to November 2020**

|                               |    | Mar 2020        |              | Apr 2020        |              | May 2020        |              | Jun 2020        |              | Jul 2020        |              | Aug 2020        |              | Sep 2020        |              | Oct 2020        |              | Nov 2020        |              |  |
|-------------------------------|----|-----------------|--------------|-----------------|--------------|-----------------|--------------|-----------------|--------------|-----------------|--------------|-----------------|--------------|-----------------|--------------|-----------------|--------------|-----------------|--------------|--|
|                               |    | N               | Mean<br>(SD) | N               | Mean<br>(SD) | N               | Mean<br>(SD) | N               | Mean<br>(SD) | N               | Mean<br>(SD) | N               | Mean<br>(SD) | N               | Mean<br>(SD) | N               | Mean<br>(SD) | N               | Mean<br>(SD) |  |
|                               |    | Median<br>(IQR) |              | Median<br>(IQR) |              | Median<br>(IQR) |              | Median<br>(IQR) |              | Median<br>(IQR) |              | Median<br>(IQR) |              | Median<br>(IQR) |              | Median<br>(IQR) |              | Median<br>(IQR) |              |  |
| <b>Lockdown efficiency</b>    |    |                 |              |                 |              |                 |              |                 |              |                 |              |                 |              |                 |              |                 |              |                 |              |  |
| Asia                          | 13 | 2.85<br>(1.14)  | 15           | 2.93<br>(1.16)  | 15           | 3.07<br>(0.88)  | 15           | 3.07<br>(0.96)  | 14           | 2.71<br>(1.20)  | 14           | 2.79<br>(1.12)  | 14           | 2.93<br>(0.92)  | 14           | 3.21<br>(0.97)  | 14           | 3.14<br>(1.03)  |              |  |
|                               |    | 3.00<br>(2.00)  |              | 3.00<br>(2.00)  |              | 3.00<br>(2.00)  |              | 3.00<br>(2.00)  |              | 3.00<br>(2.00)  |              | 3.00<br>(2.00)  |              | 3.00<br>(2.00)  |              | 4.00<br>(2.00)  |              | 4.00<br>(2.00)  |              |  |
| Non-Asia                      | 24 | 2.33<br>(1.09)  | 32           | 1.94<br>(0.95)  | 32           | 2.63<br>(1.18)  | 32           | 3.09<br>(1.00)  | 32           | 3.13<br>(0.94)  | 32           | 2.56<br>(1.13)  | 32           | 2.50<br>(1.19)  | 32           | 2.44<br>(1.08)  | 32           | 2.50<br>(1.08)  |              |  |
|                               |    | 3.00<br>(2.00)  |              | 2.00<br>(2.00)  |              | 3.00<br>(3.00)  |              | 3.00<br>(1.00)  |              | 3.00<br>(1.00)  |              | 3.00<br>(2.00)  |              | 3.00<br>(2.50)  |              | 3.00<br>(2.00)  |              | 3.00<br>(2.00)  |              |  |
| <i>P</i> value <sup>a</sup>   |    | 0.180           |              | <b>0.007</b>    |              | 0.264           |              | 0.865           |              | 0.307           |              | 0.545           |              | 0.272           |              | <b>0.027</b>    |              | 0.065           |              |  |
| <b>Health system policies</b> |    |                 |              |                 |              |                 |              |                 |              |                 |              |                 |              |                 |              |                 |              |                 |              |  |
| Asia                          | 13 | 2.73<br>(0.42)  | 15           | 3.08<br>(0.50)  | 15           | 3.20<br>(0.44)  | 15           | 3.32<br>(0.35)  | 14           | 3.35<br>(0.33)  | 14           | 3.43<br>(0.31)  | 14           | 3.41<br>(0.30)  | 14           | 3.49<br>(0.32)  | 14           | 3.52<br>(0.41)  |              |  |
|                               |    | 2.67<br>(0.53)  |              | 3.20<br>(0.80)  |              | 3.20<br>(0.53)  |              | 3.47<br>(0.27)  |              | 3.47<br>(0.27)  |              | 3.47<br>(0.27)  |              | 3.47<br>(0.00)  |              | 3.47<br>(0.27)  |              | 3.73<br>(0.27)  |              |  |
| Non-Asia                      | 24 | 2.13            | 32           | 2.59            | 32           | 2.98            | 32           | 3.11            | 32           | 3.21            | 32           | 3.32            | 32           | 3.32            | 32           | 3.33            | 32           | 3.36            |              |  |

|                             |               |              |        |        |        |        |        |        |        |
|-----------------------------|---------------|--------------|--------|--------|--------|--------|--------|--------|--------|
|                             | (0.34)        | (0.51)       | (0.50) | (0.40) | (0.34) | (0.36) | (0.38) | (0.39) | (0.36) |
|                             | 2.13          | 2.40         | 2.93   | 3.20   | 3.20   | 3.20   | 3.20   | 3.33   | 3.47   |
|                             | (0.40)        | (0.80)       | (0.53) | (0.27) | (0.27) | (0.40) | (0.27) | (0.27) | (0.40) |
| <i>P</i> value <sup>a</sup> | <b>0.0003</b> | <b>0.003</b> | 0.175  | 0.054  | 0.147  | 0.201  | 0.282  | 0.099  | 0.104  |

<sup>a</sup>*P* value is obtained through Mann–Whitney U test

**Supplementary Table S12. Comparison of the containment effectiveness between Asian and non-Asian nations and territories from March 2020 to November 2020**

|                                                |    | Mar 2020         |                  | Apr 2020        |                  | May 2020        |                  | Jun 2020        |                  | Jul 2020        |                  | Aug 2020        |                  | Sep 2020        |                           | Oct 2020        |                              | Nov 2020        |                  |
|------------------------------------------------|----|------------------|------------------|-----------------|------------------|-----------------|------------------|-----------------|------------------|-----------------|------------------|-----------------|------------------|-----------------|---------------------------|-----------------|------------------------------|-----------------|------------------|
|                                                |    | N                | Mean<br>(SD)     | N               | Mean<br>(SD)     | N               | Mean<br>(SD)     | N               | Mean<br>(SD)     | N               | Mean<br>(SD)     | N               | Mean<br>(SD)     | N               | Mean<br>(SD)              | N               | Mean<br>(SD)                 | N               | Mean<br>(SD)     |
|                                                |    | Median<br>(IQR)  |                  | Median<br>(IQR) |                  | Median<br>(IQR) |                  | Median<br>(IQR) |                  | Median<br>(IQR) |                  | Median<br>(IQR) |                  | Median<br>(IQR) |                           | Median<br>(IQR) |                              | Median<br>(IQR) |                  |
| <b>Performance score without Google Trends</b> |    |                  |                  |                 |                  |                 |                  |                 |                  |                 |                  |                 |                  |                 |                           |                 |                              |                 |                  |
| Asia                                           | 13 | 69.36<br>(10.06) | 72.17<br>(12.52) | 15              | 73.81<br>(12.25) | 15              | 73.30<br>(15.74) | 15              | 72.43<br>(14.83) | 14              | 72.19<br>(15.41) | 14              | 75.70<br>(13.29) | 14              | 79.54<br>(14.18)          | 14              | 80.19<br>(12.13)             | 14              | 82.50<br>(16.90) |
| Non-Asia                                       | 24 | 56.88<br>(10.86) | 57.81<br>(9.62)  | 32              | 61.18<br>(11.29) | 32              | 64.23<br>(12.52) | 32              | 65.48<br>(14.34) | 32              | 63.07<br>(11.69) | 32              | 62.07<br>(10.72) | 32              | 60.34<br>(10.50)          | 32              | 60.54<br>(11.72)             | 32              | 58.33<br>(12.98) |
| <i>P</i> value <sup>a</sup>                    |    | <b>0.002</b>     | <b>&lt;.0001</b> |                 | <b>0.001</b>     |                 | <b>0.039</b>     |                 | 0.141            |                 | <b>0.033</b>     |                 | <b>0.001</b>     |                 | <b>0.0002<sup>b</sup></b> |                 | <b>&lt;.0001<sup>b</sup></b> |                 |                  |
| <b>Performance score with Google Trends</b>    |    |                  |                  |                 |                  |                 |                  |                 |                  |                 |                  |                 |                  |                 |                           |                 |                              |                 |                  |
| Asia                                           | 11 | 69.80<br>(9.64)  | 72.07<br>(8.31)  | 13              | 73.75<br>(9.47)  | 13              | 75.53<br>(11.90) | 13              | 75.76<br>(10.69) | 12              | 74.85<br>(11.93) | 12              | 77.33<br>(9.77)  | 12              | 81.22<br>(8.28)           | 12              | 80.99<br>(8.24)              | 12              | 82.50<br>(10.09) |
| Non-Asia                                       | 19 | 61.92            | 59.85            | 27              | 62.44            | 27              | 65.31            | 27              | 66.79            | 27              | 64.93            | 27              | 64.98            | 27              | 63.80                     | 27              | 64.88                        | 27              |                  |

|                             |              |                  |              |              |              |              |              |                  |                           |
|-----------------------------|--------------|------------------|--------------|--------------|--------------|--------------|--------------|------------------|---------------------------|
|                             | (8.03)       | (8.22)           | (8.47)       | (9.68)       | (11.57)      | (9.68)       | (9.40)       | (9.05)           | (9.17)                    |
|                             | 63.61        | 58.89            | 62.87        | 66.48        | 64.44        | 65.83        | 65.19        | 62.41            | 62.22                     |
|                             | (15.37)      | (9.91)           | (15.37)      | (13.80)      | (15.93)      | (16.67)      | (13.89)      | (14.72)          | (10.37)                   |
| <i>P</i> value <sup>a</sup> | <b>0.023</b> | <b>&lt;.0001</b> | <b>0.001</b> | <b>0.006</b> | <b>0.028</b> | <b>0.009</b> | <b>0.001</b> | <b>&lt;.0001</b> | <b>0.0001<sup>b</sup></b> |

<sup>a</sup>Unless otherwise noted, the two-sample t test is used to compare the differences between Asia and Non-Asia nations and territories

<sup>b</sup>The Mann-Whitney U test is used to compare the differences between Asia and Non-Asia nations and territories

## Supplementary Information 12. Complete ranking and raw scores of 50 countries and territories, from March 2020 to November 2021

Supplementary Tables S13–S33 show the raw scores of all the indicators during the period of March 2020 to November 2021. These tables illustrate the performance scores with/without Google Trends data and the rankings of 50 countries. It is evident that most Asian nations and territories — such as Taiwan, and Korea — have higher scores than those in Europe or the Americas before November 2020. However, when the vaccination indicator was included in our containment performance calculation, the situation has changed, and the performance of countries in the Americas or Europe has improved.

**Supplementary Table S13. Complete ranking and raw scores of indicators in 50 countries and territories in March 2020**

| Country     | Rank | Performance score (with Google Trends) <sup>a</sup> | Concern indicators  |                        |                                                       |                           |                   |              |                       |                       |                              | Performance score (without Google Trends) |
|-------------|------|-----------------------------------------------------|---------------------|------------------------|-------------------------------------------------------|---------------------------|-------------------|--------------|-----------------------|-----------------------|------------------------------|-------------------------------------------|
|             |      |                                                     | Government policy   |                        | Vital health and socioeconomic measures               |                           |                   |              |                       | Hygiene education     |                              |                                           |
|             |      |                                                     | Lockdown efficiency | Health-system policies | One-month cases per 100,000 members of the population | Infection growth rate (%) | Fatality rate (%) | GDP loss (%) | Unemployment rate (%) | Insomnia <sup>b</sup> | Health literacy <sup>c</sup> |                                           |
| Taiwan      | 1    | 77.40                                               | 4                   | 2.93                   | 1.19                                                  | 725.64                    | 1.41              | 0.67         | 0.04                  | 0                     | 59.2                         | 81.70                                     |
| Thailand    | 2    | 75.30                                               | 4                   | 2.13                   | 2.31                                                  | 3830.95                   | 0.62              | -4.9         | 0                     | 1                     | 82.5                         | 76.81                                     |
| Japan       | 3    | 71.39                                               | 4                   | 2.4                    | 1.59                                                  | 820.41                    | 3.03              | -2.1         | 0                     | 0                     | 43.1                         | 77.45                                     |
| Qatar       | 4    | 70.34                                               | 3                   | 2.13                   | 27.07                                                 | 78000                     | 0.26              | 18.1         | 0                     | 0                     | 18.4                         | 81.44                                     |
| Russia      | 5    | 69.84                                               | 2                   | 2.4                    | 1.6                                                   | 116750                    | 0.73              | 1            | 0                     | 0                     | 58.9                         | 72.04                                     |
| Egypt       | 6    | 66.64                                               | 4                   | 1.87                   | 0.69                                                  | 70900                     | 6.49              | -0.3         | -0.4                  | 0                     | 30.9                         | 73.98                                     |
| Vietnam     | 7    | 66.60                                               | 4                   | 3.2                    | 0.2                                                   | 1225                      | 0                 | -3.14        | 0.05                  | 3                     | 33.4                         | 81.95                                     |
| Chile       | 8    | 66.13                                               | 4                   | 1.6                    | 14.87                                                 | 142100                    | 0.42              | -0.9         | 1                     | 1                     | 47.4                         | 72.61                                     |
| New Zealand | 9    | 65.84                                               | 2                   | 2.4                    | 13.4                                                  | 64600                     | 0.15              | -3           | 0                     | 0                     | 42.8                         | 70.38                                     |
| Italy       | 10   | 65.77                                               | 3                   | 2.67                   | 173.11                                                | 9278.72                   | 11.85             | -6.2         | -2.9                  | -1                    | 76.6                         | 60.13                                     |
| France      | 11   | 65.52                                               | 3                   | 2.67                   | 77.23                                                 | 52178                     | 6.75              | -7.6         | -0.9                  | -1                    | 50                           | 65.55                                     |
| Mexico      | 12   | 64.83                                               | 4                   | 1.33                   | 0.94                                                  | 30275                     | 2.39              | -2.6         | -0.3                  | 2                     | 45.9                         | 74.12                                     |
| Finland     | 13   | 64.75                                               | 1                   | 2.13                   | 25.54                                                 | 47166.67                  | 1.2               | -1.5         | 0.3                   | -1                    | 49.9                         | 64.58                                     |
| Australia   | 14   | 64.27                                               | 1                   | 2.4                    | 17.78                                                 | 18136                     | 0.4               | -0.1         | 0.1                   | 0                     | 44.5                         | 67.98                                     |
| Brazil      | 15   | 63.06                                               | 2                   | 1.6                    | 2.69                                                  | 285750                    | 3.52              | -1.5         | -0.5                  | 0                     | 50.9                         | 65.05                                     |

|                |                 |                 |   |      |        |                 |      |                 |                 |                 |                 |                 |
|----------------|-----------------|-----------------|---|------|--------|-----------------|------|-----------------|-----------------|-----------------|-----------------|-----------------|
| Canada         | 16              | 62.46           | 1 | 2.4  | 22.54  | 42535           | 1.79 | -2.1            | 2               | 0               | 61.6            | 61.97           |
| India          | 17              | 61.77           | 2 | 2.4  | 0.1    | 46466.67        | 2.51 | -2.7            | 2.1             | 0               | 38.4            | 66.10           |
| Hong Kong      | 18              | 61.46           | 4 | 2.93 | 8.26   | 651.58          | 0.32 | -9.8            | 1.4             | 2               | 23.3            | 74.67           |
| Netherlands    | 19              | 61.45           | 3 | 2.13 | 73.89  | 211016.67       | 8.21 | -1.8            | -0.4            | -2              | 25.4            | 62.78           |
| South Korea    | 20              | 61.22           | 1 | 3.2  | 12.94  | 210.67          | 2.2  | -0.3            | 0               | 2               | 42.5            | 70.21           |
| Malaysia       | 21              | 60.17           | 3 | 2.93 | 8.47   | 10964           | 1.57 | -3.8            | 0.5             | 2               | 16.4            | 74.50           |
| United Kingdom | 22              | 59.58           | 1 | 2.13 | 57.09  | 63531.15        | 6.34 | -3.9            | 0.2             | -1              | 51              | 57.69           |
| Denmark        | 23              | 59.13           | 3 | 2.13 | 52.42  | 101200          | 2.96 | -2.7            | 0.4             | 0               | 17.2            | 67.28           |
| Sweden         | 24              | 58.47           | 1 | 2.4  | 47.73  | 34428.57        | 7.99 | -1.7            | -0.6            | 1               | 55.7            | 60.97           |
| Germany        | 25              | 57.63           | 1 | 2.4  | 85.61  | 90796.2         | 1.08 | -3.3            | 0.6             | 0               | 43.9            | 59.58           |
| United States  | 26              | 57.03           | 1 | 2.13 | 58.09  | 769104          | 2.79 | -2              | 0.6             | -1              | 60.6            | 52.34           |
| Singapore      | 27              | 56.80           | 1 | 2.67 | 14.08  | 807.84          | 0.36 | -1.1            | 0.2             | 2               | 22.8            | 68.79           |
| Austria        | 28              | 54.07           | 3 | 2.13 | 112.93 | 113011.11       | 1.26 | -5.8            | 4.8             | 0               | 46              | 54.55           |
| Spain          | 29              | 51.63           | 3 | 2.13 | 205.07 | 213062.22       | 8.83 | -6.5            | -0.29           | 1               | 61.9            | 50.83           |
| Argentina      | NA <sup>d</sup> | NA <sup>d</sup> | 2 | 2.4  | 2.33   | NA <sup>d</sup> | 2.56 | 0.7             | 0.3             | 1               | 38.5            | NA <sup>d</sup> |
| Belgium        | NA <sup>d</sup> | NA <sup>d</sup> | 3 | 2.13 | 110.22 | 1277400         | 5.52 | -3.9            | -0.6            | NA <sup>d</sup> | NA <sup>d</sup> | 49.62           |
| China          | NA <sup>d</sup> | NA <sup>d</sup> | 2 | 3.47 | 0.16   | 2.91            | 20.4 | -13.2           | 0.7             | NA <sup>d</sup> | NA <sup>d</sup> | 55.71           |
| Colombia       | NA <sup>d</sup> | NA <sup>d</sup> | 4 | 2.13 | 1.78   | NA <sup>d</sup> | 1.77 | -2.9            | 1.8             | 1               | 58.5            | NA <sup>d</sup> |
| Czech Republic | Nad             | NA <sup>d</sup> | 3 | 2.4  | 30.89  | NA <sup>d</sup> | 0.94 | -4.2            | 0               | 0               | 37              | NA <sup>d</sup> |
| Greece         | NA <sup>d</sup> | NA <sup>d</sup> | 3 | 1.6  | 12.57  | 32750           | 3.74 | -2.3            | -2.3            | 2               | NA <sup>d</sup> | 73.58           |
| Hungary        | NA <sup>d</sup> | NA <sup>d</sup> | 4 | 2.4  | 5.09   | NA <sup>d</sup> | 3.25 | -2.9            | 0.1             | 0               | 61.3            | NA <sup>d</sup> |
| Indonesia      | NA <sup>d</sup> | NA <sup>d</sup> | 4 | 2.13 | 0.56   | NA <sup>d</sup> | 8.9  | -2.1            | -0.07           | 0               | 59.7            | NA <sup>d</sup> |
| Ireland        | NA <sup>d</sup> | NA <sup>d</sup> | 1 | 2.4  | 65.49  | 323400          | 2.2  | 1.6             | 0.1             | NA <sup>d</sup> | NA <sup>d</sup> | 60.76           |
| Israel         | NA <sup>d</sup> | NA <sup>d</sup> | 3 | 2.4  | 65.98  | 95183.33        | 0.37 | -2.7            | -0.2            | 2               | NA <sup>d</sup> | 70.30           |
| Norway         | NA <sup>d</sup> | NA <sup>d</sup> | 3 | 1.87 | 85.33  | 30840           | 0.84 | -0.4            | -0.3            | 0               | NA <sup>d</sup> | 68.68           |
| Pakistan       | NA <sup>d</sup> | NA <sup>d</sup> | 2 | 2.13 | 0.96   | 52850           | 1.28 | NA <sup>d</sup> | NA <sup>d</sup> | NA <sup>d</sup> | NA <sup>d</sup> | NA <sup>d</sup> |
| Peru           | NA <sup>d</sup> | NA <sup>d</sup> | 2 | 2.13 | 3.23   | NA <sup>d</sup> | 2.82 | -6.2            | -0.4            | 2               | 43.7            | NA <sup>d</sup> |
| Philippines    | NA <sup>d</sup> | NA <sup>d</sup> | 2 | 2.67 | 1.9    | 69366.67        | 4.18 | -6.6            | 0.1             | NA <sup>d</sup> | 18.9            | 67.44           |

|                      |                 |                 |   |      |        |                 |      |                 |                 |   |                 |                 |
|----------------------|-----------------|-----------------|---|------|--------|-----------------|------|-----------------|-----------------|---|-----------------|-----------------|
| Poland               | NA <sup>d</sup> | NA <sup>d</sup> | 4 | 1.6  | 6.11   | NA <sup>d</sup> | 1.43 | -3.5            | -0.5            | 0 | 61.5            | NA <sup>d</sup> |
| Portugal             | NA <sup>d</sup> | NA <sup>d</sup> | 3 | 2.4  | 72.99  | NA <sup>d</sup> | 2.15 | -4.7            | -0.1            | 1 | 36.3            | NA <sup>d</sup> |
| Saudi Arabia         | NA <sup>d</sup> | NA <sup>d</sup> | 2 | 2.67 | 4.49   | NA <sup>d</sup> | 0.64 | -2.7            | 0               | 0 | 42.2            | NA <sup>d</sup> |
| South Africa         | NA <sup>d</sup> | NA <sup>d</sup> | 4 | 2.4  | 2.28   | NA <sup>d</sup> | 0.37 | 0.4             | 2.5             | 1 | 44.4            | NA <sup>d</sup> |
| Switzerland          | NA <sup>d</sup> | NA <sup>d</sup> | 3 | 2.13 | 191.65 | 92150           | 2.61 | -1.1            | 0.5             | 0 | NA <sup>d</sup> | 58.47           |
| Turkey               | NA <sup>d</sup> | NA <sup>d</sup> | 4 | 2.4  | 16.04  | NA <sup>d</sup> | 1.58 | 7.1             | -1.1            | 0 | 40              | NA <sup>d</sup> |
| United Arab Emirates | NA <sup>d</sup> | NA <sup>d</sup> | 4 | 2.4  | 6.5    | 3061.9          | 0.93 | NA <sup>d</sup> | NA <sup>d</sup> | 1 | 42.6            | NA <sup>d</sup> |

Notes:

- a. Google Trends include indicators as insomnia and health literacy.
- b. Increase in Google searches for “insomnia”.
- c. Google Trends number for “wash hands” and “face mask”.
- d. NA: not applicable. Indicates a country not ranked due to incomplete data.



**Supplementary Table S14. Complete ranking and raw scores of indicators in 50 countries and territories in April 2020**

| Country        | Rank | Performance score (with Google Trends) <sup>a</sup> | Concern indicators  |                        |                                                       |                           |                   |              |                       |                       |                              | Performance score (without Google Trends) |
|----------------|------|-----------------------------------------------------|---------------------|------------------------|-------------------------------------------------------|---------------------------|-------------------|--------------|-----------------------|-----------------------|------------------------------|-------------------------------------------|
|                |      |                                                     | Government policy   |                        | Vital health and socioeconomic measures               |                           |                   |              |                       | Hygiene education     |                              |                                           |
|                |      |                                                     | Lockdown efficiency | Health-system policies | One-month cases per 100,000 members of the population | Infection growth rate (%) | Fatality rate (%) | GDP loss (%) | Unemployment rate (%) | Insomnia <sup>b</sup> | Health literacy <sup>c</sup> |                                           |
| Japan          | 1    | 84.86                                               | 4                   | 2.4                    | 9.51                                                  | 533.44                    | 3.44              | -10.5        | 0.2                   | 0                     | 78.63                        | 83.85                                     |
| Taiwan         | 2    | 84.81                                               | 4                   | 2.93                   | 0.45                                                  | 33.23                     | 0.93              | -2.25        | 0.37                  | 1                     | 50.88                        | 91.95                                     |
| South Korea    | 3    | 80.97                                               | 4                   | 3.2                    | 1.93                                                  | 10.1                      | 8.7               | -4.7         | -0.2                  | 0                     | 15.25                        | 90.98                                     |
| Indonesia      | 4    | 80.87                                               | 4                   | 3.2                    | 3.14                                                  | 562.17                    | 7.64              | -10.37       | 1.79                  | 1                     | 59.5                         | 85.23                                     |
| Australia      | 5    | 77.52                                               | 4                   | 2.4                    | 8.65                                                  | 48.41                     | 3.4               | -7.9         | 1.2                   | 0                     | 17.75                        | 86.06                                     |
| Hong Kong      | 6    | 73.94                                               | 4                   | 2.93                   | 4.31                                                  | 45.24                     | 0                 | -9.4         | 2.4                   | 2                     | 18.25                        | 87.08                                     |
| Poland         | 7    | 73.65                                               | 2                   | 2.93                   | 27.92                                                 | 457.2                     | 5.78              | -13.7        | 0.2                   | 0                     | 42.63                        | 76.33                                     |
| Hungary        | 8    | 71.89                                               | 4                   | 2.4                    | 23.63                                                 | 464.02                    | 12.97             | -17.9        | 0.2                   | 0                     | 19                           | 78.58                                     |
| Finland        | 9    | 71.80                                               | 1                   | 2.13                   | 64.56                                                 | 252.26                    | 5.42              | -7.2         | 0.1                   | 0                     | 49.25                        | 72.68                                     |
| Portugal       | 10   | 71.28                                               | 3                   | 2.67                   | 172.62                                                | 236.49                    | 4.71              | -18.5        | -0.7                  | 0                     | 42.25                        | 73.35                                     |
| Malaysia       | 11   | 70.09                                               | 4                   | 3.47                   | 10                                                    | 116.99                    | 1.82              | -22          | 1.6                   | 2                     | 15.5                         | 82.65                                     |
| Argentina      | 12   | 69.79                                               | 2                   | 3.2                    | 7.47                                                  | 320.11                    | 5.66              | -19.4        | 2.5                   | 1                     | 43.25                        | 74.11                                     |
| New Zealand    | 13   | 69.43                                               | 2                   | 2.67                   | 17.25                                                 | 128.59                    | 2.16              | -13.4        | 0                     | 1                     | 22.5                         | 77.61                                     |
| Saudi Arabia   | 14   | 69.34                                               | 2                   | 2.67                   | 60.87                                                 | 1355.73                   | 0.72              | -7.5         | 3.4                   | 0                     | 30.38                        | 73.13                                     |
| Italy          | 15   | 69.10                                               | 3                   | 3.73                   | 164.85                                                | 94.21                     | 15.59             | -18.7        | -2.7                  | 3                     | 50.88                        | 77.47                                     |
| South Africa   | 16   | 67.91                                               | 2                   | 2.93                   | 7.24                                                  | 317.37                    | 2.28              | -18.7        | -5.7                  | 4                     | 47.88                        | 79.37                                     |
| Czech Republic | 17   | 67.82                                               | 1                   | 3.47                   | 40.84                                                 | 132.22                    | 4.69              | -13.2        | 0.7                   | 0                     | 8.38                         | 75.38                                     |
| Vietnam        | 18   | 67.30                                               | 2                   | 3.47                   | 0.06                                                  | 27.36                     | 0                 | -6.34        | 0.57                  | 4                     | 15.63                        | 84.76                                     |
| Germany        | 19   | 66.63                                               | 1                   | 2.67                   | 108.85                                                | 127.01                    | 6.41              | -11.4        | 0.9                   | 1                     | 39.13                        | 70.83                                     |
| Austria        | 20   | 66.49                                               | 1                   | 3.2                    | 58.54                                                 | 51.79                     | 8.65              | -15          | 5.5                   | 0                     | 30.25                        | 69.49                                     |
| France         | 21   | 65.97                                               | 3                   | 2.4                    | 172.55                                                | 223.01                    | 17.86             | -20.7        | -1.3                  | 2                     | 54.88                        | 69.82                                     |
| Netherlands    | 22   | 65.97                                               | 1                   | 2.13                   | 156.67                                                | 211.93                    | 14.05             | -11          | 0.1                   | -1                    | 26.5                         | 66.68                                     |
| Egypt          | 23   | 65.63                                               | 2                   | 2.4                    | 4.72                                                  | 679.86                    | 7.17              | -7.1         | 2.1                   | 2                     | 18.88                        | 76.28                                     |

|                      |                 |                 |   |      |        |         |       |                 |                 |                 |                 |                 |
|----------------------|-----------------|-----------------|---|------|--------|---------|-------|-----------------|-----------------|-----------------|-----------------|-----------------|
| Russia               | 24              | 64.47           | 2 | 2.93 | 71.38  | 4457.04 | 1.01  | -8.9            | 1.1             | 0               | 42.5            | 64.55           |
| Turkey               | 25              | 64.43           | 1 | 2.4  | 126.48 | 788.36  | 2.77  | -8.6            | 0.5             | 1               | 32.13           | 69.34           |
| Chile                | 26              | 63.19           | 1 | 3.2  | 77.72  | 522.43  | 1.45  | -15.8           | 1.9             | 3               | 48.25           | 70.37           |
| Denmark              | 27              | 63.02           | 1 | 2.13 | 109.06 | 207.86  | 5.73  | -11.3           | 1.7             | 0               | 13.38           | 68.26           |
| Colombia             | 28              | 62.99           | 2 | 3.73 | 11.01  | 618.21  | 4.95  | -18.9           | 9.5             | 3               | 45.25           | 70.69           |
| Qatar                | 29              | 62.84           | 3 | 2.4  | 438.31 | 1616.9  | 0.06  | -4.7            | 0               | 0               | 22.38           | 66.30           |
| Singapore            | 30              | 62.80           | 1 | 3.73 | 260.55 | 1646.11 | 0.08  | -13.5           | 0.6             | 0               | 29.5            | 64.89           |
| Sweden               | 31              | 61.36           | 1 | 2.13 | 166.02 | 346.86  | 13.13 | -8.9            | 1.4             | 1               | 27.63           | 66.26           |
| Canada               | 32              | 61.12           | 1 | 2.4  | 121.69 | 538.64  | 8.77  | -14.7           | 7.3             | 1               | 48.38           | 61.97           |
| Peru                 | 33              | 59.74           | 3 | 3.2  | 108.91 | 3371.92 | 2.84  | -31.3           | 1.7             | 3               | 81              | 59.67           |
| Mexico               | 34              | 59.73           | 2 | 2.13 | 13.97  | 1482.22 | 10.16 | -17.7           | 1.18            | 4               | 55.5            | 67.39           |
| India                | 35              | 59.68           | 2 | 4    | 2.43   | 2395.56 | 3.34  | -29.8           | 16.1            | 0               | 50.88           | 56.78           |
| Brazil               | 36              | 59.58           | 2 | 2.4  | 38.33  | 1425.05 | 7.13  | -12.4           | 0.1             | 4               | 33              | 71.50           |
| United Kingdom       | 37              | 57.35           | 1 | 2.13 | 206.16 | 360.57  | 17.36 | -22.9           | 0.2             | 0               | 27.88           | 58.19           |
| Spain                | 38              | 56.98           | 3 | 2.13 | 251.34 | 122.51  | 13.68 | -23.7           | 1.31            | 3               | 39.63           | 64.04           |
| United States        | 39              | 55.44           | 1 | 2.4  | 268.49 | 462.15  | 6.85  | -11             | 11.2            | 2               | 51.25           | 56.97           |
| Belgium              | NA <sup>d</sup> | NA <sup>d</sup> | 3 | 2.13 | 308.41 | 279.8   | 19.27 | -15.7           | -0.6            | NA <sup>d</sup> | NA <sup>d</sup> | 66.04           |
| China                | NA <sup>d</sup> | NA <sup>d</sup> | 4 | 3.47 | 0.09   | 1.66    | 98.08 | -3              | 1               | NA <sup>d</sup> | NA <sup>d</sup> | 79.06           |
| Greece               | NA <sup>d</sup> | NA <sup>d</sup> | 2 | 2.13 | 12.25  | 97.18   | 7.13  | -16.2           | -1.6            | 1               | NA <sup>d</sup> | 74.89           |
| Ireland              | NA <sup>d</sup> | NA <sup>d</sup> | 3 | 2.13 | 351.92 | 537.16  | 6.68  | -8.8            | -0.4            | NA <sup>d</sup> | NA <sup>d</sup> | 68.90           |
| Israel               | NA <sup>d</sup> | NA <sup>d</sup> | 3 | 3.2  | 117.6  | 178.05  | 2     | -11.5           | -0.23           | 1               | NA <sup>d</sup> | 80.75           |
| Norway               | NA <sup>d</sup> | NA <sup>d</sup> | 1 | 2.13 | 57.13  | 66.73   | 5.52  | -2.8            | 1.2             | 0               | NA <sup>d</sup> | 74.94           |
| Pakistan             | NA <sup>d</sup> | NA <sup>d</sup> | 2 | 2.4  | 7.24   | 755.24  | 2.44  | NA <sup>d</sup> | NA <sup>d</sup> | NA <sup>d</sup> | NA <sup>d</sup> | NA <sup>d</sup> |
| Philippines          | NA <sup>d</sup> | NA <sup>d</sup> | 2 | 2.67 | 5.84   | 307.29  | 7.5   | -22.6           | 12.6            | NA <sup>d</sup> | 6.38            | 63.85           |
| Switzerland          | NA <sup>d</sup> | NA <sup>d</sup> | 1 | 2.13 | 149.99 | 78.18   | 10.05 | -7.9            | 1               | 0               | NA <sup>d</sup> | 68.84           |
| Thailand             | NA <sup>d</sup> | NA <sup>d</sup> | 4 | 3.2  | 1.87   | 78.92   | 3.38  | -14.5           | NA <sup>d</sup> | 2               | 25.88           | NA <sup>d</sup> |
| United Arab Emirates | NA <sup>d</sup> | NA <sup>d</sup> | 3 | 4    | 119.48 | 1779.67 | 0.84  | NA <sup>d</sup> | NA <sup>d</sup> | 1               | 30.63           | NA <sup>d</sup> |

Notes:

a. Google Trends include indicators as insomnia and health literacy.

- b. Increase in Google searches for “insomnia”.
- c. Google Trends number for “wash hands” and “face mask”.
- d. NA: not applicable. Indicates a country not ranked due to incomplete data.

**Supplementary Table S15. Complete ranking and raw scores of indicators in 50 countries and territories in May 2020**

| Country        | Rank | Performance score (with Google Trends) <sup>a</sup> | Concern indicators  |                        |                                                       |                           |                   |              |                       |                       |                              |       | Performance score (without Google Trends) |
|----------------|------|-----------------------------------------------------|---------------------|------------------------|-------------------------------------------------------|---------------------------|-------------------|--------------|-----------------------|-----------------------|------------------------------|-------|-------------------------------------------|
|                |      |                                                     | Government policy   |                        | Vital health and socioeconomic measures               |                           |                   |              |                       |                       | Hygiene education            |       |                                           |
|                |      |                                                     | Lockdown efficiency | Health-system policies | One-month cases per 100,000 members of the population | Infection growth rate (%) | Fatality rate (%) | GDP loss (%) | Unemployment rate (%) | Insomnia <sup>b</sup> | Health literacy <sup>c</sup> |       |                                           |
| South Korea    | 1    | 85.17                                               | 4                   | 3.47                   | 1.42                                                  | 6.77                      | 3.16              | -4.7         | 0.3                   | 0                     | 23.13                        | 90.29 |                                           |
| Taiwan         | 2    | 82.36                                               | 4                   | 2.93                   | 0.05                                                  | 3.03                      | 7.69              | -2.25        | 0.4                   | 0                     | 24.13                        | 86.39 |                                           |
| Vietnam        | 3    | 80.46                                               | 4                   | 3.47                   | 0.06                                                  | 21.48                     | 0                 | -6.34        | 0.57                  | 1                     | 11.25                        | 91.20 |                                           |
| Germany        | 4    | 78.54                                               | 4                   | 3.2                    | 24.35                                                 | 12.52                     | 9.4               | -11.4        | 1.1                   | 0                     | 26.88                        | 80.69 |                                           |
| Czech Republic | 5    | 76.78                                               | 4                   | 3.47                   | 14.81                                                 | 20.65                     | 5.3               | -13.2        | 1                     | 0                     | 8.63                         | 83.64 |                                           |
| Singapore      | 6    | 75.96                                               | 3                   | 3.73                   | 319.9                                                 | 115.75                    | 0.04              | -13.5        | 0.6                   | 0                     | 18.75                        | 79.70 |                                           |
| Austria        | 7    | 75.58                                               | 4                   | 3.2                    | 14.2                                                  | 8.28                      | 6.57              | -15          | 4.7                   | 0                     | 20.88                        | 78.60 |                                           |
| Russia         | 8    | 75.44                                               | 3                   | 3.73                   | 205.12                                                | 281.08                    | 1.21              | -8.9         | 1.6                   | 0                     | 23.88                        | 77.57 |                                           |
| Saudi Arabia   | 9    | 74.95                                               | 3                   | 2.93                   | 179.55                                                | 274.72                    | 0.55              | -7.5         | 3.4                   | 0                     | 30.63                        | 75.00 |                                           |
| Hong Kong      | 10   | 74.61                                               | 4                   | 2.93                   | 0.63                                                  | 4.53                      | 0                 | -9.4         | 3.1                   | 2                     | 14.25                        | 86.39 |                                           |
| Australia      | 11   | 74.11                                               | 4                   | 2.93                   | 1.71                                                  | 6.44                      | 2.29              | -7.9         | 1.9                   | 2                     | 12.38                        | 86.29 |                                           |
| New Zealand    | 12   | 73.93                                               | 4                   | 2.67                   | 0.52                                                  | 1.69                      | 12                | -13.4        | 0                     | 0                     | 18.25                        | 77.23 |                                           |
| Portugal       | 13   | 73.16                                               | 1                   | 3.2                    | 73.11                                                 | 29.77                     | 5.65              | -18.5        | -0.7                  | 1                     | 54.25                        | 69.53 |                                           |
| France         | 14   | 72.68                                               | 3                   | 3.2                    | 32.73                                                 | 13.1                      | 20.15             | -20.7        | -1.3                  | 0                     | 50.13                        | 66.51 |                                           |
| Poland         | 15   | 72.25                                               | 2                   | 2.93                   | 28.82                                                 | 84.72                     | 3.85              | -13.7        | 0.6                   | 0                     | 22.13                        | 73.97 |                                           |
| Egypt          | 16   | 71.48                                               | 2                   | 2.93                   | 19                                                    | 351.24                    | 2.92              | -7.1         | 2.1                   | 0                     | 30.63                        | 70.55 |                                           |
| Japan          | 17   | 70.51                                               | 4                   | 2.4                    | 1.95                                                  | 17.27                     | 16.9              | -10.5        | 0.5                   | 2                     | 41                           | 73.48 |                                           |
| Malaysia       | 18   | 70.50                                               | 2                   | 3.47                   | 5.61                                                  | 30.27                     | 0.72              | -22          | 2                     | 0                     | 12.13                        | 74.58 |                                           |
| Indonesia      | 19   | 70.28                                               | 4                   | 3.2                    | 5.98                                                  | 161.64                    | 5.02              | -10.37       | 1.79                  | 3                     | 28.13                        | 80.43 |                                           |
| Finland        | 20   | 69.05                                               | 1                   | 2.13                   | 33.64                                                 | 37.32                     | 5.85              | -7.2         | 1.8                   | 0                     | 23.13                        | 69.57 |                                           |
| South Africa   | 21   | 68.29                                               | 3                   | 3.73                   | 45.59                                                 | 478.77                    | 2.15              | -18.7        | -5.7                  | 3                     | 41.75                        | 73.98 |                                           |
| Turkey         | 22   | 67.84                                               | 3                   | 2.67                   | 51.86                                                 | 36.39                     | 3.12              | -8.6         | 0.7                   | 3                     | 16.88                        | 80.51 |                                           |
| Italy          | 23   | 66.68                                               | 1                   | 3.73                   | 45.54                                                 | 13.4                      | 19.79             | -18.7        | -1.6                  | 0                     | 36.88                        | 62.58 |                                           |
| Denmark        | 24   | 66.63                                               | 1                   | 2.67                   | 43.39                                                 | 26.86                     | 4.85              | -11.3        | 1.9                   | 0                     | 9.75                         | 70.28 |                                           |

|                      |                 |                 |   |      |        |        |       |                 |                 |                 |                 |                 |
|----------------------|-----------------|-----------------|---|------|--------|--------|-------|-----------------|-----------------|-----------------|-----------------|-----------------|
| Sweden               | 25              | 66.04           | 1 | 2.13 | 168.92 | 78.98  | 10.6  | -8.9            | 1.9             | 0               | 32.5            | 63.02           |
| Canada               | 26              | 66.01           | 1 | 3.2  | 100.74 | 69.82  | 9.8   | -14.7           | 8.3             | 0               | 39.63           | 60.94           |
| Hungary              | 27              | 65.99           | 4 | 2.93 | 11.4   | 39.68  | 19.44 | -17.9           | 0.7             | 0               | 10.75           | 69.17           |
| Colombia             | 28              | 65.83           | 3 | 3.73 | 44.96  | 351.56 | 2.82  | -18.9           | 10.91           | 2               | 50.25           | 64.82           |
| Argentina            | 29              | 65.78           | 2 | 3.2  | 27.49  | 280.56 | 2.58  | -19.4           | 2.5             | 0               | 17.25           | 67.03           |
| Netherlands          | 30              | 65.19           | 1 | 2.13 | 41.63  | 18.05  | 16.32 | -11             | 0.3             | 0               | 33.25           | 61.71           |
| Qatar                | 31              | 60.95           | 3 | 3.47 | 1509.9 | 324.42 | 0.06  | -4.7            | 0               | 2               | 19.75           | 67.26           |
| Brazil               | 32              | 60.95           | 3 | 3.73 | 201.2  | 490.51 | 5.45  | -12.4           | 0.6             | 3               | 27.63           | 68.58           |
| United Kingdom       | 33              | 59.98           | 1 | 2.4  | 116.03 | 44.06  | 13.68 | -22.9           | 0.3             | 0               | 25              | 57.37           |
| United States        | 34              | 59.66           | 1 | 2.67 | 216.83 | 66.39  | 5.8   | -11             | 9.7             | 2               | 33.38           | 61.70           |
| Spain                | 35              | 59.37           | 3 | 2.93 | 55.7   | 12.2   | 9.92  | -23.7           | 1.31            | 4               | 30.5            | 69.30           |
| Peru                 | 36              | 58.22           | 3 | 3.2  | 386.69 | 344.82 | 2.71  | -31.3           | 6.4             | 3               | 55.88           | 57.00           |
| India                | 37              | 57.49           | 2 | 4    | 11.29  | 446.74 | 2.73  | -29.8           | 14.7            | 0               | 31.5            | 52.31           |
| Chile                | 38              | 56.56           | 3 | 3.2  | 553.71 | 597.94 | 0.78  | -15.8           | 4               | 2               | 25.25           | 60.04           |
| Mexico               | 39              | 55.61           | 3 | 3.2  | 55.41  | 371.62 | 11.3  | -17.7           | 0.66            | 4               | 31.75           | 64.11           |
| Belgium              | NA <sup>d</sup> | NA <sup>d</sup> | 3 | 2.93 | 85.09  | 20.33  | 18.99 | -15.7           | -0.6            | NA <sup>d</sup> | NA <sup>d</sup> | 67.67           |
| China                | NA <sup>d</sup> | NA <sup>d</sup> | 2 | 3.47 | 0.01   | 0.17   | 0.7   | -3              | 0.9             | NA <sup>d</sup> | NA <sup>d</sup> | 85.48           |
| Greece               | NA <sup>d</sup> | NA <sup>d</sup> | 4 | 2.67 | 3.13   | 12.58  | 10.74 | -16.2           | -0.1            | 0               | NA <sup>d</sup> | 76.53           |
| Ireland              | NA <sup>d</sup> | NA <sup>d</sup> | 3 | 2.13 | 88.66  | 21.24  | 9.59  | -8.8            | -0.4            | NA <sup>d</sup> | NA <sup>d</sup> | 74.68           |
| Israel               | NA <sup>d</sup> | NA <sup>d</sup> | 2 | 3.2  | 13.67  | 7.44   | 5.24  | -11.5           | 0.58            | 0               | NA <sup>d</sup> | 77.04           |
| Norway               | NA <sup>d</sup> | NA <sup>d</sup> | 4 | 2.13 | 12.95  | 9.07   | 3.7   | -2.8            | 1.2             | 0               | NA <sup>d</sup> | 85.26           |
| Pakistan             | NA <sup>d</sup> | NA <sup>d</sup> | 2 | 2.67 | 24.6   | 300.02 | 2.07  | NA <sup>d</sup> | NA <sup>d</sup> | NA <sup>d</sup> | NA <sup>d</sup> | NA <sup>d</sup> |
| Philippines          | NA <sup>d</sup> | NA <sup>d</sup> | 2 | 2.67 | 8.76   | 113.08 | 4.05  | -22.6           | 12.6            | NA <sup>d</sup> | 5.88            | 59.63           |
| Switzerland          | NA <sup>d</sup> | NA <sup>d</sup> | 4 | 2.93 | 14.74  | 4.31   | 14.34 | -7.9            | 1.2             | 0               | NA <sup>d</sup> | 78.16           |
| Thailand             | NA <sup>d</sup> | NA <sup>d</sup> | 2 | 3.47 | 0.18   | 4.3    | 2.36  | -14.5           | NA <sup>d</sup> | 0               | 13              | NA <sup>d</sup> |
| United Arab Emirates | NA <sup>d</sup> | NA <sup>d</sup> | 1 | 4    | 223.21 | 176.88 | 0.72  | NA <sup>d</sup> | NA <sup>d</sup> | 0               | 22.63           | NA <sup>d</sup> |

Notes:

- Google Trends include indicators as insomnia and health literacy.
- Increase in Google searches for “insomnia”.
- Google Trends number for “wash hands” and “face mask”.

d. NA: not applicable. Indicates a country not ranked due to incomplete data.

**Supplementary Table S16. Complete ranking and raw scores of indicators in 50 countries in June 2020**

| Country        | Rank | Performance score (with Google Trends) <sup>a</sup> | Concern indicators  |                        |                                                       |                           |                   |              |                       |                       |                              | Performance score (without Google Trends) |
|----------------|------|-----------------------------------------------------|---------------------|------------------------|-------------------------------------------------------|---------------------------|-------------------|--------------|-----------------------|-----------------------|------------------------------|-------------------------------------------|
|                |      |                                                     | Government policy   |                        | Vital health and socioeconomic measures               |                           |                   |              |                       | Hygiene education     |                              |                                           |
|                |      |                                                     | Lockdown efficiency | Health-system policies | One-month cases per 100,000 members of the population | Infection growth rate (%) | Fatality rate (%) | GDP loss (%) | Unemployment rate (%) | Insomnia <sup>b</sup> | Health literacy <sup>c</sup> |                                           |
| Taiwan         | 1    | 86.45                                               | 4                   | 3.2                    | 0.02                                                  | 1.13                      | 0                 | -2.25        | 0.23                  | 0                     | 23                           | 92.49                                     |
| South Korea    | 2    | 85.06                                               | 4                   | 3.47                   | 2.63                                                  | 11.71                     | 0.82              | -4.7         | 0.2                   | 0                     | 21.4                         | 91.28                                     |
| Turkey         | 3    | 81.03                                               | 3                   | 3.73                   | 42.64                                                 | 21.94                     | 1.64              | -8.6         | 0.3                   | -1                    | 15.7                         | 85.26                                     |
| Vietnam        | 4    | 80.25                                               | 4                   | 3.47                   | 0.03                                                  | 8.23                      | 0                 | -6.34        | 0.57                  | 0                     | 5.1                          | 90.90                                     |
| Japan          | 5    | 80.25                                               | 4                   | 2.67                   | 1.47                                                  | 11.13                     | 3.97              | -10.5        | 0.5                   | 1                     | 34.6                         | 83.24                                     |
| Australia      | 6    | 78.76                                               | 4                   | 2.93                   | 2.82                                                  | 9.97                      | 0.14              | -7.9         | 2.2                   | 0                     | 11.4                         | 86.74                                     |
| Malaysia       | 7    | 78.38                                               | 4                   | 3.47                   | 2.53                                                  | 10.49                     | 0.73              | -22          | 1.6                   | 0                     | 23.9                         | 81.79                                     |
| Denmark        | 8    | 77.74                                               | 4                   | 2.67                   | 18.97                                                 | 9.26                      | 2.82              | -11.3        | 1.8                   | 0                     | 19.6                         | 82.50                                     |
| Russia         | 9    | 77.18                                               | 3                   | 3.73                   | 165.2                                                 | 59.4                      | 1.91              | -8.9         | 1.8                   | 0                     | 21.8                         | 80.99                                     |
| New Zealand    | 10   | 76.57                                               | 4                   | 2.67                   | 0.5                                                   | 1.6                       | 0                 | -13.4        | 0                     | 0                     | 7.6                          | 85.27                                     |
| Czech Republic | 11   | 74.49                                               | 4                   | 3.2                    | 25.08                                                 | 28.98                     | 1.08              | -13.2        | 1.1                   | 0                     | 2.7                          | 84.34                                     |
| Saudi Arabia   | 12   | 74.45                                               | 3                   | 3.73                   | 303.22                                                | 123.81                    | 1.09              | -7.5         | 3.4                   | 1                     | 31.2                         | 77.00                                     |
| Canada         | 13   | 74.31                                               | 3                   | 3.2                    | 36.08                                                 | 14.73                     | 6.42              | -14.7        | 6.8                   | -1                    | 27.5                         | 72.42                                     |
| Finland        | 14   | 74.10                                               | 4                   | 2.13                   | 6.41                                                  | 5.18                      | 2.25              | -7.2         | 1.7                   | 0                     | 4.1                          | 83.34                                     |
| Hong Kong      | 15   | 73.93                                               | 4                   | 2.93                   | 1.61                                                  | 11.16                     | 2.48              | -9.4         | 3.4                   | 1                     | 11.2                         | 83.45                                     |
| Portugal       | 16   | 73.59                                               | 3                   | 3.2                    | 94.55                                                 | 29.66                     | 1.72              | -18.5        | -0.7                  | 0                     | 16.2                         | 78.38                                     |
| Austria        | 17   | 73.53                                               | 4                   | 3.2                    | 11.49                                                 | 6.19                      | 3.57              | -15          | 3.6                   | 0                     | 9                            | 80.86                                     |
| France         | 18   | 73.20                                               | 4                   | 3.2                    | 19.64                                                 | 6.95                      | 7.85              | -20.7        | -1.3                  | 0                     | 13.4                         | 78.88                                     |
| Indonesia      | 19   | 73.02                                               | 2                   | 3.2                    | 10.94                                                 | 112.99                    | 4.22              | -10.37       | 1.79                  | 0                     | 29.9                         | 72.76                                     |
| Italy          | 20   | 72.76                                               | 4                   | 3.73                   | 12.54                                                 | 3.25                      | 17.83             | -18.7        | -0.4                  | 0                     | 24                           | 74.53                                     |
| Germany        | 21   | 72.61                                               | 2                   | 3.47                   | 14.33                                                 | 6.55                      | 3.75              | -11.4        | 1.3                   | 0                     | 13.5                         | 78.08                                     |
| South Africa   | 22   | 72.09                                               | 3                   | 3.73                   | 199.85                                                | 362.65                    | 1.67              | -18.7        | -5.7                  | 0                     | 34.7                         | 69.86                                     |
| Egypt          | 23   | 71.35                                               | 3                   | 3.2                    | 42.34                                                 | 173.41                    | 4.6               | -7.1         | 2.1                   | 1                     | 26.4                         | 74.73                                     |
| United States  | 24   | 71.20                                               | 3                   | 2.67                   | 254.82                                                | 46.89                     | 2.34              | -11          | 7.4                   | 0                     | 28.1                         | 71.07                                     |

|                      |                 |                 |   |      |         |        |       |                 |                 |                 |                 |                 |
|----------------------|-----------------|-----------------|---|------|---------|--------|-------|-----------------|-----------------|-----------------|-----------------|-----------------|
| Netherlands          | 25              | 70.54           | 1 | 3.2  | 22.4    | 8.23   | 4.09  | -11             | 0.9             | 1               | 26.4            | 73.68           |
| United Kingdom       | 26              | 69.34           | 3 | 2.93 | 40.77   | 10.75  | 10.67 | -22.9           | 0.2             | 0               | 24.9            | 69.81           |
| Poland               | 27              | 66.81           | 1 | 2.93 | 28.03   | 44.59  | 3.76  | -13.7           | 0.8             | 0               | 14.7            | 70.19           |
| India                | 28              | 66.06           | 3 | 3.47 | 28.61   | 207.16 | 3.04  | -29.8           | 2.3             | 0               | 28.7            | 64.24           |
| Singapore            | 29              | 65.48           | 1 | 3.73 | 154.23  | 25.87  | 0.03  | -13.5           | 0.6             | 3               | 19.8            | 75.23           |
| Spain                | 30              | 63.75           | 4 | 3.2  | 20.94   | 4.09   | 12.54 | -23.7           | 1.31            | 2               | 13.8            | 72.30           |
| Colombia             | 31              | 63.65           | 3 | 3.73 | 134.55  | 233    | 3.5   | -18.9           | 10.4            | 1               | 35              | 61.76           |
| Qatar                | 32              | 63.43           | 3 | 3.47 | 1359.85 | 68.84  | 0.19  | -4.7            | 0               | 1               | 6.1             | 71.78           |
| Chile                | 33              | 63.32           | 3 | 3.2  | 815.24  | 126.14 | 2.97  | -15.8           | 4.9             | 0               | 22              | 63.11           |
| Sweden               | 34              | 62.77           | 1 | 2.4  | 289.75  | 75.69  | 3.21  | -8.9            | 2.6             | 1               | 20.9            | 65.65           |
| Brazil               | 35              | 62.46           | 3 | 3.73 | 417.39  | 172.32 | 3.41  | -12.4           | 1.3             | 4               | 27.3            | 71.55           |
| Argentina            | 36              | 61.97           | 3 | 3.2  | 105.49  | 282.94 | 1.61  | -19.4           | 2.5             | 0               | 10.7            | 65.40           |
| Peru                 | 37              | 60.22           | 3 | 3.2  | 366.18  | 73.41  | 4.28  | -31.3           | 10              | 2               | 42.8            | 57.42           |
| Hungary              | 38              | 60.20           | 4 | 2.93 | 2.89    | 7.2    | 21.15 | -17.9           | 1.3             | 1               | 3.8             | 68.44           |
| Mexico               | 39              | 59.36           | 3 | 3.2  | 105.04  | 149.37 | 13.17 | -17.7           | 1.91            | 3               | 28.8            | 64.17           |
| Belgium              | NA <sup>d</sup> | NA <sup>d</sup> | 1 | 3.2  | 26.28   | 5.22   | 9.19  | -15.7           | 0               | NA <sup>d</sup> | NA <sup>d</sup> | 68.70           |
| China                | NA <sup>d</sup> | NA <sup>d</sup> | 2 | 3.47 | 0.04    | 0.62   | 0     | -3              | 0.6             | NA <sup>d</sup> | NA <sup>d</sup> | 85.68           |
| Greece               | NA <sup>d</sup> | NA <sup>d</sup> | 4 | 3.2  | 4.72    | 16.87  | 3.46  | -16.2           | 0.7             | 1               | NA <sup>d</sup> | 82.26           |
| Ireland              | NA <sup>d</sup> | NA <sup>d</sup> | 2 | 2.4  | 9.78    | 1.93   | 17.39 | -8.8            | 0.1             | NA <sup>d</sup> | NA <sup>d</sup> | 67.49           |
| Israel               | NA <sup>d</sup> | NA <sup>d</sup> | 3 | 3.2  | 96.57   | 48.94  | 0.48  | -11.5           | 0.46            | 0               | NA <sup>d</sup> | 80.97           |
| Norway               | NA <sup>d</sup> | NA <sup>d</sup> | 4 | 2.67 | 8.1     | 5.2    | 3.19  | -2.8            | 1.2             | 0               | NA <sup>d</sup> | 87.17           |
| Pakistan             | NA <sup>d</sup> | NA <sup>d</sup> | 3 | 3.2  | 63.84   | 194.6  | 2.02  | NA <sup>d</sup> | NA <sup>d</sup> | NA <sup>d</sup> | NA <sup>d</sup> | NA <sup>d</sup> |
| Philippines          | NA <sup>d</sup> | NA <sup>d</sup> | 2 | 2.67 | 17.73   | 107.42 | 1.59  | -22.6           | 12.6            | NA <sup>d</sup> | 9.2             | 58.34           |
| Switzerland          | NA <sup>d</sup> | NA <sup>d</sup> | 4 | 3.2  | 9.84    | 2.76   | 5.05  | -7.9            | 1.1             | 1               | NA <sup>d</sup> | 85.46           |
| Thailand             | NA <sup>d</sup> | NA <sup>d</sup> | 4 | 3.47 | 0.13    | 2.92   | 1.11  | -14.5           | NA <sup>d</sup> | 0               | 14.1            | NA <sup>d</sup> |
| United Arab Emirates | NA <sup>d</sup> | NA <sup>d</sup> | 3 | 3.73 | 142.66  | 40.83  | 0.36  | NA <sup>d</sup> | NA <sup>d</sup> | 2               | 25.3            | NA <sup>d</sup> |

Notes:

- Google Trends include indicators as insomnia and health literacy.
- Increase in Google searches for “insomnia”.
- Google Trends number for “wash hands” and “face mask”.



d. NA: not applicable. Indicates a country not ranked due to incomplete data.

**Supplementary Table S17. Complete ranking and raw scores of indicators in 50 countries and territories in July 2020**

| Country        | Rank | Performance score (with Google Trends) <sup>a</sup> | Concern indicators  |                        |                                                       |                           |                   |              |                       |                       |                              | Performance score (without Google Trends) |
|----------------|------|-----------------------------------------------------|---------------------|------------------------|-------------------------------------------------------|---------------------------|-------------------|--------------|-----------------------|-----------------------|------------------------------|-------------------------------------------|
|                |      |                                                     | Government policy   |                        | Vital health and socioeconomic measures               |                           |                   |              |                       | Hygiene education     |                              |                                           |
|                |      |                                                     | Lockdown efficiency | Health-system policies | One-month cases per 100,000 members of the population | Infection growth rate (%) | Fatality rate (%) | GDP loss (%) | Unemployment rate (%) | Insomnia <sup>b</sup> | Health literacy <sup>c</sup> |                                           |
| Malaysia       | 1    | 86.32                                               | 4                   | 3.47                   | 1.04                                                  | 3.9                       | 1.19              | -7.1         | 1.4                   | 0                     | 49                           | 85.99                                     |
| Netherlands    | 2    | 81.75                                               | 4                   | 3.2                    | 23.97                                                 | 8.14                      | 0.83              | -4.2         | 1.1                   | 0                     | 27.5                         | 86.92                                     |
| Taiwan         | 3    | 81.37                                               | 4                   | 3.2                    | 0.08                                                  | 4.47                      | 0                 | 1.23         | 0.18                  | 1                     | 16.38                        | 93.52                                     |
| South Korea    | 4    | 80.41                                               | 4                   | 3.47                   | 2.9                                                   | 11.56                     | 1.28              | -3           | 0.1                   | 0                     | 13.75                        | 89.55                                     |
| France         | 5    | 79.97                                               | 4                   | 3.2                    | 34.03                                                 | 11.26                     | 1.84              | -5.5         | 0.7                   | -1                    | 16                           | 84.69                                     |
| New Zealand    | 6    | 78.73                                               | 4                   | 2.67                   | 0.71                                                  | 2.23                      | 0                 | -2.3         | 1.1                   | 0                     | 10.63                        | 88.38                                     |
| Thailand       | 7    | 77.77                                               | 4                   | 3.47                   | 0.2                                                   | 4.38                      | 0                 | -9.1         | 1                     | 0                     | 10.88                        | 87.05                                     |
| Germany        | 8    | 77.69                                               | 4                   | 3.47                   | 17.88                                                 | 7.67                      | 1.05              | -4.5         | 1.4                   | 0                     | 10.25                        | 87.15                                     |
| Finland        | 9    | 76.58                                               | 4                   | 2.4                    | 3.93                                                  | 3.02                      | 0.46              | -4.3         | 1.7                   | 0                     | 13.88                        | 84.58                                     |
| Italy          | 10   | 76.07                                               | 4                   | 3.73                   | 11.51                                                 | 2.89                      | 5.37              | -5.7         | 0.2                   | 0                     | 17.13                        | 82.90                                     |
| Denmark        | 11   | 74.61                                               | 4                   | 2.93                   | 18.3                                                  | 8.17                      | 0.94              | -5.2         | 1.5                   | 1                     | 16.5                         | 84.79                                     |
| Poland         | 12   | 74.12                                               | 4                   | 2.93                   | 29.84                                                 | 32.84                     | 2.24              | -6.3         | 0.9                   | 0                     | 14.88                        | 81.10                                     |
| Turkey         | 13   | 74.00                                               | 1                   | 3.73                   | 36.72                                                 | 15.49                     | 1.81              | 5.3          | 0.5                   | 0                     | 10                           | 82.49                                     |
| United Kingdom | 14   | 73.77                                               | 2                   | 3.2                    | 28.84                                                 | 6.86                      | 4.06              | -9.9         | 0.5                   | 0                     | 41.63                        | 72.18                                     |
| Japan          | 15   | 73.18                                               | 4                   | 2.67                   | 13.93                                                 | 94.65                     | 0.2               | -6.7         | 0.7                   | 1                     | 26.75                        | 79.71                                     |
| Czech Republic | 16   | 72.78                                               | 4                   | 3.2                    | 43.14                                                 | 38.65                     | 0.71              | -7.2         | 1.1                   | 0                     | 3.88                         | 82.86                                     |
| Canada         | 17   | 71.91                                               | 2                   | 3.2                    | 32.28                                                 | 11.48                     | 2.01              | -7           | 5.2                   | 0                     | 39.38                        | 70.50                                     |
| Russia         | 18   | 71.40                                               | 3                   | 3.47                   | 131.25                                                | 29.61                     | 2.42              | -5           | 1.8                   | 0                     | 18.13                        | 76.57                                     |
| Spain          | 19   | 70.53                                               | 3                   | 3.2                    | 83.95                                                 | 15.75                     | 0.23              | -10.4        | 2.34                  | 0                     | 13.63                        | 76.88                                     |
| Hungary        | 20   | 70.31                                               | 4                   | 2.93                   | 3.62                                                  | 8.42                      | 3.14              | -9.4         | 1.4                   | 0                     | 4.88                         | 79.37                                     |
| Vietnam        | 21   | 70.21                                               | 2                   | 3.47                   | 0.21                                                  | 57.18                     | 1.48              | -4.69        | 0.33                  | 0                     | 9                            | 77.94                                     |
| Portugal       | 22   | 69.58                                               | 3                   | 3.2                    | 87.59                                                 | 21.19                     | 1.78              | -7.6         | 1.7                   | 0                     | 10.38                        | 76.68                                     |
| Australia      | 23   | 69.29                                               | 2                   | 3.2                    | 36.71                                                 | 118.18                    | 1.04              | -5.6         | 2.3                   | 0                     | 31.13                        | 69.74                                     |

|                      |                 |                 |   |      |        |        |      |                 |                 |                 |                 |                 |
|----------------------|-----------------|-----------------|---|------|--------|--------|------|-----------------|-----------------|-----------------|-----------------|-----------------|
| Egypt                | 24              | 69.16           | 3 | 3.2  | 25.18  | 37.72  | 7.19 | -4.9            | -0.5            | 0               | 18.5            | 73.58           |
| Sweden               | 25              | 67.89           | 3 | 2.4  | 90.62  | 13.47  | 4.48 | -4.3            | 2               | 1               | 30.13           | 71.84           |
| Saudi Arabia         | 26              | 67.87           | 3 | 3.73 | 244.39 | 44.59  | 1.43 | -4.1            | 3               | 0               | 11              | 74.29           |
| Austria              | 27              | 67.22           | 1 | 3.2  | 37.35  | 18.94  | 0.39 | -5.4            | 2.7             | 0               | 12.38           | 73.02           |
| India                | 28              | 67.12           | 3 | 3.47 | 80.47  | 189.67 | 1.72 | -12             | 0.1             | 1               | 43.5            | 66.61           |
| Hong Kong            | 29              | 63.54           | 2 | 2.93 | 27.57  | 171.54 | 0.97 | -0.8            | 3.2             | 0               | 14.88           | 67.49           |
| Singapore            | 30              | 61.53           | 1 | 3.73 | 141.84 | 18.9   | 0.01 | -6.5            | 1.3             | 3               | 19.63           | 74.13           |
| Brazil               | 31              | 59.82           | 3 | 3.73 | 592.98 | 89.9   | 2.61 | -5.2            | 2               | 0               | 17.5            | 61.88           |
| Argentina            | 32              | 56.05           | 3 | 3.2  | 280.5  | 196.45 | 1.76 | -8.3            | 2               | 0               | 7.75            | 60.12           |
| South Africa         | 33              | 55.07           | 3 | 3.73 | 576.6  | 226.16 | 1.56 | -6.3            | 1.7             | 1               | 31.5            | 54.92           |
| Chile                | 34              | 54.74           | 3 | 3.2  | 399    | 27.3   | 4.94 | -12.4           | 5.6             | 0               | 15.5            | 55.99           |
| United States        | 35              | 52.84           | 3 | 3.47 | 581.64 | 72.87  | 1.38 | -4.9            | 6.5             | 3               | 33.88           | 58.44           |
| Mexico               | 36              | 51.89           | 3 | 3.2  | 153.99 | 87.82  | 9.53 | -8.5            | 1.7             | 3               | 29.25           | 58.69           |
| Colombia             | 37              | 48.65           | 3 | 3.73 | 388.46 | 202.01 | 3.43 | -11.7           | 9.5             | 0               | 26.63           | 44.64           |
| Peru                 | 38              | 46.61           | 3 | 3.47 | 370.86 | 42.87  | 7.64 | -12.2           | 10.4            | 2               | 35.25           | 46.43           |
| Belgium              | NA <sup>d</sup> | NA <sup>d</sup> | 1 | 3.2  | 63.19  | 11.92  | 1.28 | -6.2            | 0.7             | NA <sup>d</sup> | NA <sup>d</sup> | 73.64           |
| China                | NA <sup>d</sup> | NA <sup>d</sup> | 2 | 3.47 | 0.06   | 0.96   | 0    | -1.1            | 0.4             | NA <sup>d</sup> | NA <sup>d</sup> | 85.84           |
| Greece               | NA <sup>d</sup> | NA <sup>d</sup> | 4 | 3.47 | 10.25  | 31.33  | 1.31 | -11.6           | -0.5            | 1               | NA <sup>d</sup> | 83.56           |
| Indonesia            | NA <sup>d</sup> | NA <sup>d</sup> | 2 | 3.2  | 19.01  | 92.21  | 4.34 | -8.51           | NA <sup>d</sup> | 0               | 26.88           | NA <sup>d</sup> |
| Ireland              | NA <sup>d</sup> | NA <sup>d</sup> | 4 | 3.2  | 11.99  | 2.32   | 4.56 | 1.8             | 1.1             | NA <sup>d</sup> | NA <sup>d</sup> | 85.68           |
| Israel               | NA <sup>d</sup> | NA <sup>d</sup> | 1 | 3.2  | 534.87 | 182    | 0.51 | -4.4            | 1               | 0               | NA <sup>d</sup> | 53.36           |
| Norway               | NA <sup>d</sup> | NA <sup>d</sup> | 4 | 2.67 | 6.66   | 4.07   | 1.39 | -1              | 1.6             | 0               | NA <sup>d</sup> | 86.18           |
| Pakistan             | NA <sup>d</sup> | NA <sup>d</sup> | 3 | 3.2  | 29.35  | 30.37  | 2.4  | NA <sup>d</sup> | NA <sup>d</sup> | NA <sup>d</sup> | NA <sup>d</sup> | NA <sup>d</sup> |
| Philippines          | NA <sup>d</sup> | NA <sup>d</sup> | 3 | 2.93 | 50.96  | 148.85 | 1.36 | -17.9           | 4.6             | NA <sup>d</sup> | 4.25            | 58.99           |
| Qatar                | NA <sup>d</sup> | NA <sup>d</sup> | 3 | 3.47 | 507    | 15.2   | 0.42 | -4.3            | NA <sup>d</sup> | 1               | 4.38            | NA <sup>d</sup> |
| Switzerland          | NA <sup>d</sup> | NA <sup>d</sup> | 1 | 3.47 | 40.65  | 11.09  | 0.51 | -2.6            | 1.1             | 0               | NA <sup>d</sup> | 78.05           |
| United Arab Emirates | NA <sup>d</sup> | NA <sup>d</sup> | 1 | 3.73 | 119.7  | 24.33  | 0.3  | NA <sup>d</sup> | NA <sup>d</sup> | 0               | 6.25            | NA <sup>d</sup> |

Notes:

- a. Google Trends include indicators as insomnia and health literacy.
- b. Increase in Google searches for “insomnia”.

- c. Google Trends number for “wash hands” and “face mask”.
- d. NA: not applicable. Indicates a country not ranked due to incomplete data.

**Supplementary Table S18. Complete ranking and raw scores of indicators in 50 countries and territories in August 2020**

| Country        | Rank | Performance score (with Google Trends) <sup>a</sup> | Concern indicators  |                        |                                                       |                           |                   |              |                       |                       |                              | Performance score (without Google Trends) |
|----------------|------|-----------------------------------------------------|---------------------|------------------------|-------------------------------------------------------|---------------------------|-------------------|--------------|-----------------------|-----------------------|------------------------------|-------------------------------------------|
|                |      |                                                     | Government policy   |                        | Vital health and socioeconomic measures               |                           |                   |              |                       | Hygiene education     |                              |                                           |
|                |      |                                                     | Lockdown efficiency | Health-system policies | One-month cases per 100,000 members of the population | Infection growth rate (%) | Fatality rate (%) | GDP loss (%) | Unemployment rate (%) | Insomnia <sup>b</sup> | Health literacy <sup>c</sup> |                                           |
| Taiwan         | 1    | 89.30                                               | 4                   | 3.47                   | 0.09                                                  | 4.5                       | 0                 | 1.23         | 0.1                   | 0                     | 24.5                         | 93.76                                     |
| Turkey         | 2    | 86.24                                               | 4                   | 3.73                   | 46.55                                                 | 17.01                     | 1.73              | 5.3          | -1                    | 0                     | 13.63                        | 94.47                                     |
| Italy          | 3    | 82.16                                               | 4                   | 3.73                   | 35.85                                                 | 8.76                      | 1.58              | -5.7         | 0.4                   | 0                     | 18.63                        | 87.09                                     |
| New Zealand    | 4    | 81.13                                               | 2                   | 2.93                   | 3.94                                                  | 12.16                     | 0                 | -2.3         | 1.1                   | 0                     | 31.38                        | 80.31                                     |
| Finland        | 5    | 80.55                                               | 4                   | 2.67                   | 11.8                                                  | 8.8                       | 1.07              | -4.3         | 1.6                   | 0                     | 21.88                        | 83.63                                     |
| South Korea    | 6    | 80.44                                               | 4                   | 3.47                   | 11.4                                                  | 40.78                     | 0.39              | -3           | 0.2                   | 0                     | 14.75                        | 86.54                                     |
| Malaysia       | 7    | 79.62                                               | 2                   | 3.47                   | 1.12                                                  | 4.06                      | 0.55              | -7.1         | 1.4                   | 0                     | 29.5                         | 79.18                                     |
| Germany        | 8    | 79.30                                               | 4                   | 3.47                   | 41.06                                                 | 16.35                     | 0.45              | -4.5         | 1.5                   | 0                     | 13                           | 85.82                                     |
| Thailand       | 9    | 78.70                                               | 4                   | 3.47                   | 0.15                                                  | 3.08                      | 0                 | -9.1         | 0.9                   | 0                     | 9.63                         | 86.49                                     |
| Canada         | 10   | 75.97                                               | 2                   | 3.2                    | 33.48                                                 | 10.68                     | 1.33              | -7           | 4.5                   | 0                     | 35.38                        | 71.96                                     |
| Poland         | 11   | 75.60                                               | 4                   | 3.2                    | 57.29                                                 | 47.46                     | 1.49              | -6.3         | 0.9                   | 0                     | 16                           | 79.77                                     |
| Denmark        | 12   | 75.56                                               | 1                   | 2.93                   | 58.39                                                 | 24.11                     | 0.27              | -5.2         | 1.2                   | 0                     | 33.63                        | 72.19                                     |
| United Kingdom | 13   | 74.17                                               | 2                   | 3.2                    | 49.04                                                 | 10.92                     | 0.95              | -9.9         | 0.6                   | 0                     | 21.88                        | 75.43                                     |
| France         | 14   | 74.13                                               | 1                   | 4                      | 139.01                                                | 41.33                     | 0.4               | -5.5         | 0.7                   | -1                    | 20.88                        | 72.94                                     |
| South Africa   | 15   | 74.00                                               | 3                   | 3.73                   | 225.7                                                 | 27.14                     | 4.59              | -6.3         | 1.7                   | 0                     | 28.5                         | 72.37                                     |
| Hungary        | 16   | 73.09                                               | 4                   | 2.93                   | 16.91                                                 | 36.27                     | 1.16              | -9.4         | 1.2                   | 0                     | 10.63                        | 78.85                                     |
| Saudi Arabia   | 17   | 72.84                                               | 3                   | 3.73                   | 114.51                                                | 14.45                     | 2.59              | -4.1         | 3                     | 0                     | 12.38                        | 77.78                                     |
| Singapore      | 18   | 72.79                                               | 1                   | 3.73                   | 78.75                                                 | 8.82                      | 0                 | -6.5         | 1.3                   | 0                     | 17.25                        | 75.63                                     |
| Austria        | 19   | 72.46                                               | 4                   | 3.2                    | 70.04                                                 | 29.85                     | 0.24              | -5.4         | 2.3                   | 1                     | 9.25                         | 81.49                                     |
| Japan          | 20   | 71.93                                               | 4                   | 2.67                   | 25.43                                                 | 88.76                     | 0.9               | -6.7         | 0.8                   | 1                     | 23.5                         | 74.71                                     |
| Sweden         | 21   | 71.65                                               | 1                   | 2.4                    | 72.31                                                 | 9.48                      | 1.07              | -4.3         | 1.9                   | 1                     | 33                           | 70.29                                     |
| Portugal       | 22   | 71.24                                               | 3                   | 3.2                    | 68.06                                                 | 13.59                     | 1.25              | -7.6         | 1.7                   | 0                     | 7.13                         | 77.97                                     |
| Russia         | 23   | 70.20                                               | 1                   | 3.47                   | 105.49                                                | 18.36                     | 2.07              | -5           | 2.1                   | 0                     | 21                           | 70.70                                     |
| Australia      | 24   | 69.50                                               | 2                   | 4                      | 33.49                                                 | 49.42                     | 5.34              | -5.6         | 1.6                   | 0                     | 18.38                        | 70.91                                     |

|                      |                 |                 |   |      |        |        |       |                 |                 |                 |                 |                 |
|----------------------|-----------------|-----------------|---|------|--------|--------|-------|-----------------|-----------------|-----------------|-----------------|-----------------|
| Egypt                | 25              | 68.36           | 2 | 3.2  | 4.75   | 5.17   | 12.67 | -4.9            | -0.5            | 0               | 21.25           | 68.22           |
| Netherlands          | 26              | 67.69           | 1 | 3.2  | 108.8  | 34.15  | 0.46  | -4.2            | 1.1             | 0               | 11.25           | 71.64           |
| Hong Kong            | 27              | 64.54           | 2 | 3.73 | 20.51  | 47     | 4.03  | -0.8            | 3.2             | 2               | 12.5            | 72.78           |
| Brazil               | 28              | 64.02           | 3 | 3.73 | 586.09 | 46.79  | 2.32  | -5.2            | 2.6             | 0               | 15.13           | 65.27           |
| Spain                | 29              | 63.18           | 3 | 3.2  | 372.87 | 60.42  | 0.37  | -10.4           | 2.34            | 0               | 12.13           | 65.47           |
| India                | 30              | 62.94           | 3 | 3.47 | 144.58 | 117.64 | 1.44  | -12             | 0.2             | 0               | 11.25           | 65.54           |
| Chile                | 31              | 62.55           | 3 | 3.2  | 293.25 | 15.76  | 3.27  | -12.4           | 5.3             | 0               | 15.25           | 63.32           |
| Czech Republic       | 32              | 62.46           | 1 | 3.2  | 75.11  | 48.53  | 0.52  | -7.2            | 1.1             | 0               | 2               | 68.87           |
| United States        | 33              | 60.72           | 3 | 3.73 | 440.93 | 31.95  | 2.03  | -4.9            | 4.7             | 4               | 26.88           | 67.42           |
| Mexico               | 34              | 57.24           | 3 | 3.2  | 135.67 | 41.19  | 10.13 | -8.5            | 1.5             | 4               | 25.75           | 63.43           |
| Argentina            | 35              | 55.47           | 3 | 3.2  | 501    | 118.36 | 2.26  | -8.3            | 2               | 0               | 10              | 56.46           |
| Vietnam              | 36              | 54.90           | 2 | 2.93 | 0.5    | 87.1   | 6.38  | -4.69           | 0.33            | 3               | 8.75            | 64.84           |
| Colombia             | 37              | 53.53           | 3 | 3.73 | 628.08 | 108.15 | 2.99  | -11.7           | 6               | 0               | 22.25           | 48.73           |
| Peru                 | 38              | 52.91           | 3 | 3.73 | 726.91 | 58.82  | 4.08  | -12.2           | 9.8             | 0               | 28.13           | 45.41           |
| Belgium              | NA <sup>d</sup> | NA <sup>d</sup> | 1 | 3.47 | 142.24 | 23.98  | 0.33  | -6.2            | 1.3             | NA <sup>d</sup> | NA <sup>d</sup> | 71.67           |
| China                | NA <sup>d</sup> | NA <sup>d</sup> | 2 | 3.47 | 0.05   | 0.85   | 0     | -1.1            | 0.4             | NA <sup>d</sup> | NA <sup>d</sup> | 85.17           |
| Greece               | NA <sup>d</sup> | NA <sup>d</sup> | 4 | 3.47 | 56.03  | 130.44 | 1.03  | -11.6           | 0.4             | 1               | NA <sup>d</sup> | 69.94           |
| Indonesia            | NA <sup>d</sup> | NA <sup>d</sup> | 2 | 3.2  | 24.28  | 61.29  | 3.44  | -8.51           | NA <sup>d</sup> | 0               | 22.5            | NA <sup>d</sup> |
| Ireland              | NA <sup>d</sup> | NA <sup>d</sup> | 2 | 3.2  | 55.61  | 10.54  | 0.51  | 1.8             | 1.6             | NA <sup>d</sup> | NA <sup>d</sup> | 81.72           |
| Israel               | NA <sup>d</sup> | NA <sup>d</sup> | 1 | 3.2  | 521.89 | 62.97  | 0.86  | -4.4            | 1.19            | 1               | NA <sup>d</sup> | 59.79           |
| Norway               | NA <sup>d</sup> | NA <sup>d</sup> | 4 | 2.93 | 28.44  | 16.69  | 0.58  | -1              | 1.6             | 1               | NA <sup>d</sup> | 85.98           |
| Pakistan             | NA <sup>d</sup> | NA <sup>d</sup> | 4 | 3.47 | 7.94   | 6.3    | 1.96  | NA <sup>d</sup> | NA <sup>d</sup> | NA <sup>d</sup> | NA <sup>d</sup> | NA <sup>d</sup> |
| Philippines          | NA <sup>d</sup> | NA <sup>d</sup> | 3 | 3.47 | 116.32 | 136.54 | 1.2   | -17.9           | 4.6             | NA <sup>d</sup> | 9.38            | 54.92           |
| Qatar                | NA <sup>d</sup> | NA <sup>d</sup> | 3 | 3.47 | 280.56 | 7.3    | 0.28  | -4.3            | NA <sup>d</sup> | 0               | 24              | NA <sup>d</sup> |
| Switzerland          | NA <sup>d</sup> | NA <sup>d</sup> | 1 | 3.47 | 80.25  | 19.71  | 0.36  | -2.6            | 1.2             | 1               | NA <sup>d</sup> | 75.65           |
| United Arab Emirates | NA <sup>d</sup> | NA <sup>d</sup> | 1 | 3.73 | 98.33  | 16.07  | 0.34  | NA <sup>d</sup> | NA <sup>d</sup> | 2               | 26.38           | NA <sup>d</sup> |

Notes:

- a. Google Trends include indicators as insomnia and health literacy.
- b. Increase in Google searches for “insomnia”.

- c. Google Trends number for “wash hands” and “face mask”.
- d. NA: not applicable. Indicates a country not ranked due to incomplete data.

**Supplementary Table S19. Complete ranking and raw scores of indicators in 50 countries and territories in September 2020**

| Country        | Rank | Performance score (with Google Trends) <sup>a</sup> | Concern indicators  |                        |                                                       |                           |                   |              |                       |                       |                              | Performance score (without Google Trends) |
|----------------|------|-----------------------------------------------------|---------------------|------------------------|-------------------------------------------------------|---------------------------|-------------------|--------------|-----------------------|-----------------------|------------------------------|-------------------------------------------|
|                |      |                                                     | Government policy   |                        | Vital health and socioeconomic measures               |                           |                   |              |                       | Hygiene education     |                              |                                           |
|                |      |                                                     | Lockdown efficiency | Health-system policies | One-month cases per 100,000 members of the population | Infection growth rate (%) | Fatality rate (%) | GDP loss (%) | Unemployment rate (%) | Insomnia <sup>b</sup> | Health literacy <sup>c</sup> |                                           |
| Taiwan         | 1    | 85.74                                               | 4                   | 3.47                   | 0.11                                                  | 5.33                      | 0                 | 1.23         | 0.04                  | 0                     | 18.6                         | 93.90                                     |
| Italy          | 2    | 83.59                                               | 4                   | 3.73                   | 75.5                                                  | 16.96                     | 0.9               | -5.7         | 0.2                   | 0                     | 24.6                         | 88.44                                     |
| Singapore      | 3    | 81.41                                               | 4                   | 3.73                   | 16.29                                                 | 1.68                      | 0                 | -6.5         | 1.3                   | 0                     | 18.1                         | 88.56                                     |
| New Zealand    | 4    | 80.08                                               | 4                   | 3.2                    | 1.99                                                  | 5.48                      | 3.13              | -2.3         | 1.1                   | 0                     | 17.8                         | 86.99                                     |
| South Africa   | 5    | 79.56                                               | 4                   | 3.73                   | 79.75                                                 | 7.54                      | 5.47              | -6.3         | 1.7                   | 0                     | 25.1                         | 83.03                                     |
| Finland        | 6    | 79.51                                               | 4                   | 2.67                   | 34.4                                                  | 23.57                     | 0.42              | -4.3         | 1.7                   | -2                    | 13.3                         | 84.20                                     |
| South Korea    | 7    | 79.47                                               | 4                   | 3.47                   | 7.23                                                  | 18.37                     | 2.45              | -3           | 0.6                   | 0                     | 13.7                         | 88.06                                     |
| Germany        | 8    | 79.21                                               | 4                   | 3.47                   | 57.42                                                 | 19.65                     | 0.4               | -4.5         | 1.4                   | 0                     | 14.7                         | 87.26                                     |
| Turkey         | 9    | 78.71                                               | 2                   | 3.73                   | 57.54                                                 | 17.97                     | 3.76              | 5.3          | -1.2                  | 0                     | 12.5                         | 87.62                                     |
| Japan          | 10   | 77.35                                               | 4                   | 2.67                   | 12.01                                                 | 22.22                     | 1.82              | -6.7         | 0.6                   | 0                     | 18.4                         | 83.21                                     |
| Poland         | 11   | 77.33                                               | 4                   | 3.2                    | 63.79                                                 | 35.83                     | 1.96              | -6.3         | 1                     | 0                     | 17.3                         | 83.68                                     |
| Canada         | 12   | 75.65                                               | 2                   | 3.2                    | 79.99                                                 | 23.06                     | 0.66              | -7           | 3.5                   | 0                     | 32.8                         | 74.53                                     |
| United Kingdom | 13   | 75.32                                               | 3                   | 3.47                   | 173.47                                                | 34.83                     | 0.55              | -9.9         | 1                     | 0                     | 22                           | 78.97                                     |
| Russia         | 14   | 74.57                                               | 1                   | 3.47                   | 122.24                                                | 17.98                     | 1.96              | -5           | 1.8                   | -1                    | 26.4                         | 73.98                                     |
| Brazil         | 15   | 74.34                                               | 3                   | 3.73                   | 424.66                                                | 23.1                      | 2.5               | -5.2         | 2.8                   | 0                     | 23.1                         | 77.22                                     |
| Malaysia       | 16   | 74.32                                               | 2                   | 3.47                   | 5.82                                                  | 20.17                     | 0.48              | -7.1         | 1.3                   | 0                     | 19                           | 79.04                                     |
| Thailand       | 17   | 74.31                                               | 4                   | 3.47                   | 0.22                                                  | 4.6                       | 0.64              | -9.1         | 0.79                  | 1                     | 7.7                          | 86.16                                     |
| Mexico         | 18   | 72.44                                               | 3                   | 3.2                    | 111.42                                                | 23.96                     | 9.21              | -8.5         | 1.3                   | 2                     | 36.7                         | 72.73                                     |
| India          | 19   | 72.31                                               | 3                   | 3.47                   | 189.96                                                | 71.02                     | 1.27              | -12          | -0.5                  | 1                     | 21.9                         | 77.19                                     |
| Netherlands    | 20   | 71.76                                               | 1                   | 3.2                    | 307.89                                                | 72.04                     | 0.39              | -4.2         | 0.9                   | 0                     | 27.9                         | 71.74                                     |
| Portugal       | 21   | 71.73                                               | 3                   | 3.2                    | 171.92                                                | 30.22                     | 0.85              | -7.6         | 1.7                   | 1                     | 17.2                         | 78.56                                     |
| Saudi Arabia   | 22   | 70.33                                               | 2                   | 3.73                   | 54.1                                                  | 5.96                      | 4.62              | -4.1         | 3                     | 0                     | 12.9                         | 76.66                                     |
| France         | 23   | 68.70                                               | 1                   | 4                      | 421.43                                                | 88.66                     | 0.47              | -5.5         | 0.7                   | 0                     | 18.2                         | 72.18                                     |
| Vietnam        | 24   | 68.01                                               | 2                   | 2.93                   | 0.05                                                  | 4.79                      | 2                 | -4.69        | 0.33                  | 1                     | 5                            | 79.28                                     |



|                      |                 |                 |   |      |         |        |       |                 |                 |                 |                 |                 |
|----------------------|-----------------|-----------------|---|------|---------|--------|-------|-----------------|-----------------|-----------------|-----------------|-----------------|
| Sweden               | 25              | 67.94           | 2 | 2.4  | 84.01   | 10.05  | 0.85  | -4.3            | 2.3             | 2               | 18.5            | 75.15           |
| Denmark              | 26              | 67.85           | 1 | 3.2  | 191.1   | 63.58  | 0.23  | -5.2            | 1.1             | 0               | 15.1            | 72.48           |
| Austria              | 27              | 67.46           | 1 | 3.47 | 192.92  | 63.32  | 0.38  | -5.4            | 1.7             | 0               | 14              | 72.48           |
| Spain                | 28              | 66.20           | 3 | 3.2  | 655.18  | 66.18  | 0.88  | -10.4           | 2.34            | 0               | 16.1            | 69.91           |
| Hong Kong            | 29              | 65.88           | 2 | 3.47 | 3.69    | 5.76   | 5.78  | -0.8            | 3.5             | 2               | 9.1             | 76.74           |
| United States        | 30              | 65.65           | 3 | 3.73 | 365.11  | 20.05  | 1.94  | -4.9            | 4.3             | 5               | 22              | 76.74           |
| Chile                | 31              | 65.52           | 3 | 3.2  | 268.18  | 12.45  | 2.83  | -12.4           | 5               | 0               | 14.1            | 69.93           |
| Egypt                | 32              | 64.98           | 2 | 3.2  | 4.16    | 4.3    | 11.95 | -4.9            | -0.5            | 2               | 14.3            | 73.24           |
| Argentina            | 33              | 63.98           | 3 | 3.2  | 737.38  | 79.78  | 2.48  | -8.3            | 2               | -1              | 7.3             | 68.98           |
| Peru                 | 34              | 63.80           | 3 | 3.73 | 499.22  | 25.43  | 2.19  | -12.2           | 10.7            | 0               | 24.9            | 62.86           |
| Australia            | 35              | 62.79           | 2 | 4    | 5.01    | 4.95   | 18.09 | -5.6            | 1.7             | 0               | 10.3            | 68.14           |
| Colombia             | 36              | 62.76           | 3 | 2.4  | 421.72  | 34.89  | 2.95  | -11.7           | 5.6             | 0               | 18.8            | 64.27           |
| Czech Republic       | 37              | 58.32           | 1 | 3.47 | 430.9   | 187.44 | 0.5   | -7.2            | 1.1             | 0               | 5.9             | 64.38           |
| Hungary              | 38              | 54.56           | 1 | 2.93 | 210.37  | 331.03 | 0.74  | -9.4            | 0.9             | 1               | 16              | 57.03           |
| Belgium              | NA <sup>d</sup> | NA <sup>d</sup> | 1 | 3.47 | 286.6   | 38.97  | 0.36  | -6.2            | 1.2             | NA <sup>d</sup> | NA <sup>d</sup> | 72.77           |
| China                | NA <sup>d</sup> | NA <sup>d</sup> | 2 | 3.47 | 0.02    | 0.42   | 0     | -1.1            | 0.2             | NA <sup>d</sup> | NA <sup>d</sup> | 85.34           |
| Greece               | NA <sup>d</sup> | NA <sup>d</sup> | 4 | 3.47 | 78.27   | 79.07  | 1.53  | -11.6           | -0.4            | 1               | NA <sup>d</sup> | 81.39           |
| Indonesia            | NA <sup>d</sup> | NA <sup>d</sup> | 2 | 3.2  | 41.02   | 64.2   | 2.96  | -8.51           | NA <sup>d</sup> | 0               | 29              | NA <sup>d</sup> |
| Ireland              | NA <sup>d</sup> | NA <sup>d</sup> | 1 | 3.2  | 148.73  | 25.49  | 0.37  | 1.8             | 2               | NA <sup>d</sup> | NA <sup>d</sup> | 77.65           |
| Israel               | NA <sup>d</sup> | NA <sup>d</sup> | 3 | 3.2  | 1507.76 | 111.63 | 0.5   | -4.4            | 1               | 0               | NA <sup>d</sup> | 65.47           |
| Norway               | NA <sup>d</sup> | NA <sup>d</sup> | 4 | 2.93 | 59.86   | 30.1   | 0.31  | -1              | 1.6             | 0               | NA <sup>d</sup> | 86.84           |
| Pakistan             | NA <sup>d</sup> | NA <sup>d</sup> | 4 | 3.47 | 7.68    | 5.73   | 1.12  | NA <sup>d</sup> | NA <sup>d</sup> | NA <sup>d</sup> | NA <sup>d</sup> | NA <sup>d</sup> |
| Philippines          | NA <sup>d</sup> | NA <sup>d</sup> | 3 | 3.47 | 82.93   | 41.15  | 2.14  | -17.9           | 4.6             | NA <sup>d</sup> | 6.2             | 69.05           |
| Qatar                | NA <sup>d</sup> | NA <sup>d</sup> | 3 | 3.47 | 242.34  | 5.88   | 0.24  | -4.3            | NA <sup>d</sup> | 1               | 25.6            | NA <sup>d</sup> |
| Switzerland          | NA <sup>d</sup> | NA <sup>d</sup> | 1 | 3.47 | 128.31  | 26.33  | 0.61  | -2.6            | 1.1             | 0               | NA <sup>d</sup> | 76.95           |
| United Arab Emirates | NA <sup>d</sup> | NA <sup>d</sup> | 1 | 3.73 | 242.25  | 34.11  | 0.15  | NA <sup>d</sup> | NA <sup>d</sup> | 0               | 16.6            | NA <sup>d</sup> |

Notes:

- Google Trends include indicators as insomnia and health literacy.
- Increase in Google searches for “insomnia”.
- Google Trends number for “wash hands” and “face mask”.

d. NA: not applicable. Indicates a country not ranked due to incomplete data.

**Supplementary Table S20. Complete ranking and raw scores of indicators in 50 countries and territories in October 2020**

| Country      | Rank | Performance score (with Google Trends) <sup>a</sup> | Concern indicators  |                        |                                                       |                           |                   |              |                       |                       |                              | Performance score (without Google Trends) |
|--------------|------|-----------------------------------------------------|---------------------|------------------------|-------------------------------------------------------|---------------------------|-------------------|--------------|-----------------------|-----------------------|------------------------------|-------------------------------------------|
|              |      |                                                     | Government policy   |                        | Vital health and socioeconomic measures               |                           |                   |              |                       | Hygiene education     |                              |                                           |
|              |      |                                                     | Lockdown efficiency | Health-system policies | One-month cases per 100,000 members of the population | Infection growth rate (%) | Fatality rate (%) | GDP loss (%) | Unemployment rate (%) | Insomnia <sup>b</sup> | Health literacy <sup>c</sup> |                                           |
| Taiwan       | 1    | 85.79                                               | 4                   | 3.47                   | 0.17                                                  | 7.98                      | 0                 | 1.86         | 0.05                  | 0                     | 14.63                        | 96.22                                     |
| Singapore    | 2    | 83.16                                               | 4                   | 3.73                   | 4.27                                                  | 0.43                      | 0.4               | -3.4         | 1                     | -1                    | 12.88                        | 91.01                                     |
| India        | 3    | 82.61                                               | 2                   | 3.73                   | 135.62                                                | 29.65                     | 1.25              | -2.8         | -1.1                  | 0                     | 41.75                        | 83.69                                     |
| New Zealand  | 4    | 80.78                                               | 4                   | 2.93                   | 2.3                                                   | 6.01                      | 0                 | -2.6         | 0.8                   | -1                    | 7.5                          | 89.62                                     |
| Japan        | 5    | 80.57                                               | 4                   | 2.67                   | 14.02                                                 | 21.22                     | 1.09              | 0.3          | 0.7                   | 0                     | 17.5                         | 88.62                                     |
| South Korea  | 6    | 79.07                                               | 4                   | 3.73                   | 5.36                                                  | 11.49                     | 1.86              | -3.4         | 0.7                   | 0                     | 12.38                        | 88.28                                     |
| Vietnam      | 7    | 78.90                                               | 4                   | 2.93                   | 0.09                                                  | 7.86                      | 0                 | -2.31        | 0.22                  | 0                     | 4.38                         | 90.55                                     |
| Canada       | 8    | 78.34                                               | 4                   | 3.2                    | 201.91                                                | 47.3                      | 1.16              | -4.8         | 3.4                   | -1                    | 26.38                        | 80.60                                     |
| Finland      | 9    | 78.10                                               | 4                   | 2.67                   | 110.47                                                | 61.26                     | 0.23              | -2.2         | 1.2                   | 0                     | 17.63                        | 85.40                                     |
| Thailand     | 10   | 77.90                                               | 4                   | 3.47                   | 0.31                                                  | 6.02                      | 0                 | -5.5         | 1.19                  | 0                     | 6.5                          | 88.60                                     |
| Italy        | 11   | 76.89                                               | 3                   | 3.73                   | 602.97                                                | 115.79                    | 0.75              | -6.4         | 0.5                   | -2                    | 23.38                        | 77.29                                     |
| Hong Kong    | 12   | 76.40                                               | 4                   | 3.47                   | 3.15                                                  | 4.64                      | 0                 | 0.2          | 3.3                   | 2                     | 8.75                         | 90.75                                     |
| Saudi Arabia | 13   | 74.81                                               | 4                   | 3.73                   | 36.41                                                 | 3.79                      | 5                 | -3.6         | 1.7                   | 0                     | 17.63                        | 81.17                                     |
| Denmark      | 14   | 74.42                                               | 1                   | 3.2                    | 317.39                                                | 64.55                     | 0.39              | -3.8         | 0.9                   | 0                     | 38.75                        | 74.09                                     |
| Turkey       | 15   | 73.52                                               | 2                   | 3.73                   | 67.23                                                 | 17.79                     | 3.63              | -0.5         | -0.5                  | 0                     | 11.88                        | 81.30                                     |
| Netherlands  | 16   | 73.51                                               | 3                   | 3.2                    | 1351.93                                               | 183.87                    | 0.43              | -4.4         | 0.8                   | 0                     | 45.88                        | 70.70                                     |
| South Africa | 17   | 73.25                                               | 4                   | 3.73                   | 86.18                                                 | 7.58                      | 4.97              | -3.7         | 3.4                   | 0                     | 19.63                        | 78.54                                     |
| Portugal     | 18   | 72.93                                               | 3                   | 3.2                    | 644.69                                                | 87.02                     | 0.82              | -8.3         | 0.4                   | 0                     | 30.75                        | 74.68                                     |
| Chile        | 19   | 72.67                                               | 3                   | 3.2                    | 247.25                                                | 10.21                     | 3.1               | 2            | 4.5                   | 0                     | 15.88                        | 78.97                                     |
| Germany      | 20   | 72.60                                               | 2                   | 3.47                   | 285.11                                                | 81.55                     | 0.41              | -3.7         | 1.4                   | 0                     | 20.13                        | 77.55                                     |
| Australia    | 21   | 72.38                                               | 2                   | 4                      | 1.96                                                  | 1.84                      | 3.81              | -3.3         | 1.7                   | -1                    | 11.13                        | 77.70                                     |
| Brazil       | 22   | 70.58                                               | 3                   | 3.73                   | 340.93                                                | 15.06                     | 2.2               | -2.7         | 2.7                   | 1                     | 11                           | 80.17                                     |
| Russia       | 23   | 69.92                                               | 1                   | 3.47                   | 298.4                                                 | 37.19                     | 1.64              | -3.9         | 1.7                   | 0                     | 24.38                        | 72.79                                     |
| Sweden       | 24   | 69.09                                               | 1                   | 2.4                    | 311.82                                                | 33.91                     | 0.14              | -2.9         | 1.8                   | 1                     | 29.5                         | 72.50                                     |

|                      |                 |                 |   |      |         |        |      |                 |                 |                 |                 |                 |
|----------------------|-----------------|-----------------|---|------|---------|--------|------|-----------------|-----------------|-----------------|-----------------|-----------------|
| Malaysia             | 25              | 68.24           | 2 | 3.73 | 62.79   | 181.08 | 0.56 | -7              | 1.5             | 1               | 25.5            | 72.66           |
| United Kingdom       | 26              | 67.47           | 3 | 3.2  | 823.36  | 122.62 | 0.79 | -8.5            | 1.1             | 0               | 18.88           | 71.35           |
| Austria              | 27              | 66.81           | 3 | 3.47 | 667.44  | 134.14 | 0.52 | -5.8            | 1.7             | 1               | 13              | 74.71           |
| Argentina            | 28              | 65.78           | 3 | 3.47 | 920.27  | 55.38  | 3.38 | -3.2            | 2.1             | 0               | 7.25            | 72.79           |
| Peru                 | 29              | 65.05           | 3 | 3.47 | 268.14  | 10.89  | 2.28 | -3.6            | 10              | 1               | 22.5            | 69.49           |
| Egypt                | 30              | 64.89           | 2 | 3.2  | 4.26    | 4.22   | 7.71 | -3.6            | -0.8            | 0               | 10.88           | 70.52           |
| France               | 31              | 64.56           | 1 | 4    | 1196.6  | 133.43 | 0.6  | -5.6            | -0.1            | 0               | 14.38           | 69.00           |
| Colombia             | 32              | 63.09           | 3 | 2.4  | 480.53  | 29.47  | 2.17 | -6.8            | 4.9             | 0               | 11.88           | 67.89           |
| Spain                | 33              | 62.77           | 3 | 3.47 | 890.8   | 54.15  | 0.98 | -10.6           | 2.35            | 2               | 16.38           | 70.84           |
| Mexico               | 34              | 61.12           | 2 | 3.2  | 140.96  | 24.45  | 7.76 | -3.8            | 1.1             | 2               | 24.13           | 66.31           |
| United States        | 35              | 59.53           | 1 | 3.73 | 583.13  | 26.68  | 1.27 | -4.7            | 3.3             | 4               | 19.25           | 70.55           |
| Poland               | 36              | 59.05           | 1 | 3.2  | 716.62  | 296.37 | 1.15 | -6.4            | 1.1             | 0               | 23              | 59.23           |
| Hungary              | 37              | 56.38           | 1 | 3.2  | 505.78  | 184.65 | 2.02 | -7.8            | 0.8             | 1               | 10              | 62.23           |
| Czech Republic       | 38              | 51.48           | 3 | 3.47 | 2468.39 | 373.56 | 0.98 | -6.8            | 1.1             | 0               | 5.25            | 55.03           |
| Belgium              | NA <sup>d</sup> | NA <sup>d</sup> | 1 | 3.47 | 2681.51 | 262.37 | 0.52 | -6.5            | 0.8             | NA <sup>d</sup> | NA <sup>d</sup> | 52.49           |
| China                | NA <sup>d</sup> | NA <sup>d</sup> | 2 | 3.47 | 0.04    | 0.68   | 0    | 0.5             | 0.2             | NA <sup>d</sup> | NA <sup>d</sup> | 88.01           |
| Greece               | NA <sup>d</sup> | NA <sup>d</sup> | 2 | 4    | 199.33  | 112.45 | 1.13 | -7.8            | -0.3            | 0               | NA <sup>d</sup> | 76.11           |
| Indonesia            | NA <sup>d</sup> | NA <sup>d</sup> | 4 | 3.2  | 45      | 42.88  | 2.54 | -7.16           | NA <sup>d</sup> | 0               | 23.88           | NA <sup>d</sup> |
| Ireland              | NA <sup>d</sup> | NA <sup>d</sup> | 3 | 3.2  | 512.39  | 69.98  | 0.43 | -4.4            | 1.5             | NA <sup>d</sup> | NA <sup>d</sup> | 78.63           |
| Israel               | NA <sup>d</sup> | NA <sup>d</sup> | 3 | 3.47 | 773.35  | 27.06  | 1.43 | -4.4            | 1.1             | 1               | NA <sup>d</sup> | 78.52           |
| Norway               | NA <sup>d</sup> | NA <sup>d</sup> | 4 | 2.93 | 116.28  | 44.94  | 0.13 | -2.3            | 1               | 0               | NA <sup>d</sup> | 87.28           |
| Pakistan             | NA <sup>d</sup> | NA <sup>d</sup> | 4 | 3.47 | 9.58    | 6.77   | 1.6  | NA <sup>d</sup> | NA <sup>d</sup> | NA <sup>d</sup> | NA <sup>d</sup> | NA <sup>d</sup> |
| Philippines          | NA <sup>d</sup> | NA <sup>d</sup> | 2 | 3.47 | 63      | 22.15  | 2.49 | -14.9           | 4.2             | NA <sup>d</sup> | 22.13           | 64.11           |
| Qatar                | NA <sup>d</sup> | NA <sup>d</sup> | 3 | 3.47 | 235.89  | 5.4    | 0.26 | -3.3            | NA <sup>d</sup> | 0               | 0               | NA <sup>d</sup> |
| Switzerland          | NA <sup>d</sup> | NA <sup>d</sup> | 1 | 3.47 | 1166.65 | 189.5  | 0.22 | -3.2            | 1               | 1               | NA <sup>d</sup> | 66.44           |
| United Arab Emirates | NA <sup>d</sup> | NA <sup>d</sup> | 1 | 3.73 | 388.65  | 40.81  | 0.2  | NA <sup>d</sup> | NA <sup>d</sup> | 0               | 22.5            | NA <sup>d</sup> |

Notes:

- a. Google Trends include indicators as insomnia and health literacy.
- b. Increase in Google searches for “insomnia”.

- c. Google Trends number for “wash hands” and “face mask”.
- d. NA: not applicable. Indicates a country not ranked due to incomplete data.

**Supplementary Table S21. Complete ranking and raw scores of indicators in 50 countries and territories in November 2020**

| Country      | Rank | Performance score (with Google Trends) <sup>a</sup> | Concern indicators  |                        |                                                       |                           |                   |              |                       |                       |                              | Performance score (without Google Trends) |
|--------------|------|-----------------------------------------------------|---------------------|------------------------|-------------------------------------------------------|---------------------------|-------------------|--------------|-----------------------|-----------------------|------------------------------|-------------------------------------------|
|              |      |                                                     | Government policy   |                        | Vital health and socioeconomic measures               |                           |                   |              |                       | Hygiene education     |                              |                                           |
|              |      |                                                     | Lockdown efficiency | Health-system policies | One-month cases per 100,000 members of the population | Infection growth rate (%) | Fatality rate (%) | GDP loss (%) | Unemployment rate (%) | Insomnia <sup>b</sup> | Health literacy <sup>c</sup> |                                           |
| Taiwan       | 1    | 82.84                                               | 4                   | 3.47                   | 0.5                                                   | 21.62                     | 0                 | 1.86         | 0.04                  | 0                     | 16.5                         | 95.12                                     |
| Australia    | 2    | 82.69                                               | 4                   | 3.73                   | 1.24                                                  | 1.15                      | 0.32              | -3.3         | 1.7                   | -2                    | 8.13                         | 90.16                                     |
| India        | 3    | 76.82                                               | 2                   | 3.73                   | 92.66                                                 | 15.62                     | 1.21              | -2.8         | -0.7                  | 0                     | 30                           | 83.56                                     |
| New Zealand  | 4    | 76.57                                               | 4                   | 2.93                   | 2.07                                                  | 5.1                       | 0                 | -2.6         | 0.8                   | 0                     | 7.75                         | 89.53                                     |
| South Korea  | 5    | 76.47                                               | 4                   | 3.73                   | 15.64                                                 | 30.1                      | 0.75              | -3.4         | 0.6                   | 0                     | 10.63                        | 88.59                                     |
| Japan        | 6    | 76.44                                               | 4                   | 2.67                   | 37.66                                                 | 47.01                     | 0.64              | 0.3          | 0.8                   | 0                     | 18.25                        | 86.40                                     |
| Vietnam      | 7    | 76.19                                               | 4                   | 2.93                   | 0.17                                                  | 14.15                     | 0                 | -2.31        | 0.22                  | 0                     | 4.5                          | 89.97                                     |
| Egypt        | 8    | 75.93                                               | 4                   | 3.47                   | 8.17                                                  | 7.77                      | 4.6               | -3.6         | -0.8                  | 0                     | 24.38                        | 84.01                                     |
| Singapore    | 9    | 75.44                                               | 4                   | 3.73                   | 3.47                                                  | 0.35                      | 0.49              | -3.4         | 1                     | 1                     | 10.63                        | 90.84                                     |
| Turkey       | 10   | 71.43                                               | 2                   | 3.73                   | 312.41                                                | 70.19                     | 1.33              | -0.5         | -0.3                  | -1                    | 9.13                         | 78.96                                     |
| Saudi Arabia | 11   | 71.13                                               | 4                   | 3.73                   | 28.95                                                 | 2.9                       | 4.9               | -3.6         | 1.7                   | 0                     | 13.63                        | 80.87                                     |
| Thailand     | 12   | 70.43                                               | 4                   | 2.93                   | 0.32                                                  | 5.92                      | 0.45              | -5.5         | 0.9                   | 1                     | 4.88                         | 86.03                                     |
| Hong Kong    | 13   | 70.40                                               | 4                   | 3.47                   | 13.22                                                 | 18.62                     | 0.4               | 0.2          | 3.1                   | 2                     | 8.5                          | 88.54                                     |
| South Africa | 14   | 70.17                                               | 4                   | 3.73                   | 108.84                                                | 8.9                       | 3.5               | -3.7         | 3.4                   | 0                     | 12.75                        | 79.89                                     |
| Chile        | 15   | 66.40                                               | 2                   | 3.2                    | 217.03                                                | 8.13                      | 2.9               | 2            | 3.8                   | 0                     | 11.13                        | 75.50                                     |
| Germany      | 16   | 66.24                                               | 3                   | 2.93                   | 642.27                                                | 101.19                    | 1.15              | -3.7         | 1.4                   | -1                    | 17                           | 70.07                                     |
| Brazil       | 17   | 64.81                                               | 1                   | 3.73                   | 376.49                                                | 14.46                     | 1.65              | -2.7         | 2.9                   | 0                     | 16.5                         | 71.94                                     |
| Finland      | 18   | 64.70                                               | 4                   | 2.67                   | 158.81                                                | 54.61                     | 0.47              | -2.2         | 1                     | 2                     | 2.63                         | 82.87                                     |
| Argentina    | 19   | 64.63                                               | 3                   | 3.47                   | 569.98                                                | 22.08                     | 3                 | -3.2         | 2.1                   | 0                     | 7                            | 74.40                                     |
| Russia       | 20   | 63.91                                               | 1                   | 3.47                   | 458.88                                                | 41.69                     | 1.75              | -3.9         | 1.5                   | 0                     | 22                           | 69.23                                     |
| Sweden       | 21   | 63.38                                               | 1                   | 2.4                    | 1176.07                                               | 95.51                     | 0.63              | -2.9         | 0.9                   | 0                     | 52                           | 60.05                                     |
| Peru         | 22   | 62.67                                               | 2                   | 3.47                   | 189.1                                                 | 6.93                      | 2.43              | -3.6         | 8.8                   | -1                    | 17                           | 65.48                                     |
| Malaysia     | 23   | 62.67                                               | 2                   | 3.73                   | 105.51                                                | 108.24                    | 0.33              | -7           | 1.6                   | 0                     | 9.63                         | 71.13                                     |
| Canada       | 24   | 62.19                                               | 1                   | 3.2                    | 382.18                                                | 60.78                     | 1.36              | -4.8         | 2.6                   | 0                     | 26.63                        | 65.71                                     |
| France       | 25   | 61.44                                               | 3                   | 4                      | 1276.58                                               | 60.98                     | 1.85              | -5.6         | -0.1                  | 1                     | 14.63                        | 71.71                                     |

|                      |                 |                 |   |      |         |        |      |                 |                 |                 |                 |                 |
|----------------------|-----------------|-----------------|---|------|---------|--------|------|-----------------|-----------------|-----------------|-----------------|-----------------|
| Colombia             | 26              | 61.29           | 3 | 2.93 | 476.82  | 22.59  | 2.25 | -6.8            | 4               | 0               | 12.13           | 68.65           |
| United Kingdom       | 27              | 60.59           | 3 | 3.2  | 911.74  | 60.99  | 1.92 | -8.5            | 1.2             | 0               | 15              | 66.94           |
| Denmark              | 28              | 60.58           | 1 | 3.2  | 589.4   | 72.85  | 0.34 | -3.8            | 0.8             | 0               | 8.5             | 68.77           |
| Mexico               | 29              | 60.48           | 2 | 3.2  | 146.26  | 20.39  | 7.52 | -3.8            | 1               | 0               | 19.38           | 65.56           |
| Spain                | 30              | 59.15           | 3 | 3.47 | 989.22  | 39.01  | 1.99 | -10.6           | 2.35            | 0               | 13.88           | 65.40           |
| Netherlands          | 31              | 59.03           | 1 | 3.2  | 1017.17 | 48.73  | 1.14 | -4.4            | 0.5             | 0               | 11.38           | 65.96           |
| Italy                | 32              | 58.93           | 3 | 3.73 | 1525.13 | 135.72 | 1.84 | -6.4            | 0.1             | 0               | 23.75           | 62.33           |
| United States        | 33              | 56.97           | 1 | 3.73 | 1360.93 | 49.15  | 0.87 | -4.7            | 3.2             | 0               | 17.38           | 61.61           |
| Portugal             | 34              | 56.42           | 3 | 3.47 | 1537.57 | 110.97 | 1.27 | -8.3            | 0.4             | 0               | 12.75           | 62.22           |
| Austria              | 35              | 51.49           | 3 | 3.73 | 1971.16 | 169.2  | 1.17 | -5.8            | 2.2             | 0               | 15              | 55.25           |
| Czech Republic       | 36              | 51.17           | 3 | 3.47 | 1757.37 | 56.16  | 2.68 | -6.8            | 1.2             | 1               | 1.5             | 62.21           |
| Hungary              | 37              | 49.20           | 3 | 3.2  | 1467.87 | 188.26 | 2.17 | -7.8            | 0.9             | 0               | 9.5             | 53.85           |
| Poland               | 38              | 49.18           | 3 | 3.2  | 1659.54 | 173.15 | 1.83 | -6.4            | 1               | 1               | 16.88           | 55.31           |
| Belgium              | NA <sup>d</sup> | NA <sup>d</sup> | 3 | 3.47 | 1278.01 | 34.51  | 3.39 | -6.5            | 0.6             | NA <sup>d</sup> | NA <sup>d</sup> | 67.09           |
| China                | NA <sup>d</sup> | NA <sup>d</sup> | 2 | 4    | 0.04    | 0.63   | 0    | 0.5             | 0.1             | NA <sup>d</sup> | NA <sup>d</sup> | 90.23           |
| Greece               | NA <sup>d</sup> | NA <sup>d</sup> | 3 | 4    | 633.4   | 168.2  | 2.7  | -7.8            | -0.5            | 0               | NA <sup>d</sup> | 65.28           |
| Indonesia            | NA <sup>d</sup> | NA <sup>d</sup> | 4 | 3.2  | 47.09   | 31.41  | 2.39 | -7.16           | NA <sup>d</sup> | 0               | 22.13           | NA <sup>d</sup> |
| Ireland              | NA <sup>d</sup> | NA <sup>d</sup> | 3 | 3.2  | 224.55  | 18.04  | 1.26 | -4.4            | 1.3             | NA <sup>d</sup> | NA <sup>d</sup> | 79.69           |
| Israel               | NA <sup>d</sup> | NA <sup>d</sup> | 2 | 4    | 263.9   | 7.27   | 1.36 | -4.4            | 0.8             | 1               | NA <sup>d</sup> | 80.07           |
| Norway               | NA <sup>d</sup> | NA <sup>d</sup> | 1 | 3.2  | 291.8   | 77.81  | 0.32 | -2.3            | 1               | 0               | NA <sup>d</sup> | 71.53           |
| Pakistan             | NA <sup>d</sup> | NA <sup>d</sup> | 4 | 3.73 | 30.11   | 19.92  | 1.91 | NA <sup>d</sup> | NA <sup>d</sup> | NA <sup>d</sup> | NA <sup>d</sup> | NA <sup>d</sup> |
| Philippines          | NA <sup>d</sup> | NA <sup>d</sup> | 2 | 3.47 | 46.45   | 13.37  | 2.3  | -14.9           | 4.2             | NA <sup>d</sup> | 28.75           | 63.55           |
| Qatar                | NA <sup>d</sup> | NA <sup>d</sup> | 2 | 3.47 | 217.87  | 4.74   | 0.08 | -3.3            | NA <sup>d</sup> | 1               | 8               | NA <sup>d</sup> |
| Switzerland          | NA <sup>d</sup> | NA <sup>d</sup> | 1 | 3.47 | 1996.86 | 112.04 | 1.46 | -3.2            | 1               | 0               | NA <sup>d</sup> | 54.77           |
| United Arab Emirates | NA <sup>d</sup> | NA <sup>d</sup> | 1 | 4    | 366.32  | 27.32  | 0.21 | NA <sup>d</sup> | NA <sup>d</sup> | 1               | 7.5             | NA <sup>d</sup> |

Notes:

- a. Google Trends include indicators as insomnia and health literacy.
- b. Increase in Google searches for “insomnia”.
- c. Google Trends number for “wash hands” and “face mask”.
- d. NA: not applicable. Indicates a country not ranked due to incomplete data.

**Supplementary Table S22. Complete ranking and raw scores of indicators in 50 countries and territories in December 2020**

| Country        | Rank            | Performance score (with Google Trends) <sup>a</sup> | Concern indicators  |                        |                            |                                                       |                           |                   |              |                       |                       |                              | Performance score (without Google Trends) |
|----------------|-----------------|-----------------------------------------------------|---------------------|------------------------|----------------------------|-------------------------------------------------------|---------------------------|-------------------|--------------|-----------------------|-----------------------|------------------------------|-------------------------------------------|
|                |                 |                                                     | Government policy   |                        |                            | Vital health and socioeconomic measures               |                           |                   |              |                       |                       | Hygiene education            |                                           |
|                |                 |                                                     | Lockdown efficiency | Health-system policies | People covered by vaccines | One-month cases per 100,000 members of the population | Infection growth rate (%) | Fatality rate (%) | GDP loss (%) | Unemployment rate (%) | Insomnia <sup>b</sup> | Health literacy <sup>c</sup> |                                           |
| Taiwan         | 1               | 78.50                                               | 4                   | 2.67                   | 0                          | 0.52                                                  | 18.37                     | 0                 | 1.86         | 0.04                  | -1                    | 16.4                         | 80.84                                     |
| Finland        | 2               | 64.73                                               | 4                   | 2.1                    | 0.02                       | 202.05                                                | 44.94                     | 1.45              | -2.2         | 1.8                   | -1                    | 2                            | 68.41                                     |
| Chile          | 3               | 61.14                                               | 2                   | 2.67                   | 0.02                       | 299.38                                                | 10.37                     | 2.09              | 2            | 3.2                   | 0                     | 11.1                         | 65.07                                     |
| Argentina      | 4               | 59.15                                               | 3                   | 2.67                   | 0.04                       | 444.69                                                | 14.11                     | 2.25              | -3.2         | 2.1                   | 0                     | 5.1                          | 64.57                                     |
| Germany        | 5               | 58.22                                               | 3                   | 2.29                   | 0.12                       | 824.27                                                | 64.55                     | 2.48              | -3.7         | 0.7                   | 0                     | 16                           | 59.79                                     |
| Sweden         | 6               | 57.77                                               | 3                   | 1.9                    | 0.01                       | 1923.41                                               | 79.9                      | 1.05              | -2.9         | 2.2                   | 0                     | 39.6                         | 51.38                                     |
| Poland         | 7               | 57.18                                               | 3                   | 2.48                   | 0.06                       | 803.42                                                | 30.69                     | 3.75              | -6.4         | 1                     | 0                     | 19                           | 57.49                                     |
| Russia         | 8               | 56.64                                               | 1                   | 2.67                   | 0.02                       | 583.42                                                | 37.41                     | 1.97              | -3.9         | 1.3                   | 0                     | 17.5                         | 57.31                                     |
| Canada         | 9               | 56.05                                               | 3                   | 2.67                   | 0.13                       | 542.42                                                | 53.49                     | 1.72              | -4.8         | 3.2                   | 1                     | 18.9                         | 60.28                                     |
| United Kingdom | 10              | 55.91                                               | 3                   | 3.05                   | 0.74                       | 1270.51                                               | 52.79                     | 1.75              | -8.5         | 1.3                   | 0                     | 12.4                         | 58.09                                     |
| Austria        | 11              | 55.32                                               | 3                   | 2.86                   | 0.03                       | 870.04                                                | 27.74                     | 3.88              | -5.8         | 2.5                   | 0                     | 15.3                         | 56.40                                     |
| Portugal       | 12              | 54.51                                               | 3                   | 2.67                   | 0.16                       | 1133.87                                               | 38.79                     | 2.08              | -8.3         | 0.4                   | 0                     | 7.1                          | 58.10                                     |
| France         | 13              | 54.49                                               | 1                   | 2.86                   | 0                          | 593.2                                                 | 17.6                      | 2.98              | -5.6         | -0.1                  | 0                     | 7.9                          | 57.82                                     |
| Mexico         | 14              | 54.39                                               | 2                   | 2.48                   | 0.01                       | 242.41                                                | 28.07                     | 6.36              | -3.8         | 0.9                   | 0                     | 14.3                         | 55.56                                     |
| Italy          | 15              | 52.22                                               | 3                   | 2.86                   | 0.03                       | 836.25                                                | 31.57                     | 3.68              | -6.4         | 0.2                   | 2                     | 19                           | 59.63                                     |
| Denmark        | 16              | 49.24                                               | 1                   | 2.48                   | 0.29                       | 1434.93                                               | 102.61                    | 0.55              | -3.8         | 0.7                   | 0                     | 6                            | 51.89                                     |
| Hungary        | 17              | 45.23                                               | 3                   | 2.29                   | 0.01                       | 1090.97                                               | 48.54                     | 4.47              | -7.8         | 0.8                   | 1                     | 3                            | 52.04                                     |
| Czech Republic | 18              | 45.22                                               | 3                   | 3.05                   | 0.06                       | 1824.29                                               | 37.33                     | 1.68              | -6.8         | 1.1                   | 2                     | 5.1                          | 55.50                                     |
| United States  | 19              | 42.39                                               | 1                   | 3.24                   | 0.42                       | 1942.45                                               | 47.03                     | 1.26              | -4.7         | 3.2                   | 2                     | 15.1                         | 48.64                                     |
| Australia      | NA <sup>d</sup> | NA <sup>d</sup>                                     | 2                   | 2.48                   | NA <sup>d</sup>            | 2.01                                                  | 1.84                      | 0.19              | -3.3         | 1.5                   | -1                    | 7.6                          | NA <sup>d</sup>                           |
| Belgium        | NA <sup>d</sup> | NA <sup>d</sup>                                     | 1                   | 2.67                   | 0                          | 596.66                                                | 11.98                     | 4.17              | -6.5         | 0.8                   | NA <sup>d</sup>       | NA <sup>d</sup>              | 53.48                                     |
| Brazil         | NA <sup>d</sup> | NA <sup>d</sup>                                     | 1                   | 2.86                   | NA <sup>d</sup>            | 630.46                                                | 21.15                     | 1.63              | -2.7         | 2.9                   | 1                     | 14.9                         | NA <sup>d</sup>                           |



|                      |                 |                 |   |      |                 |         |        |      |                 |                 |                 |                 |                 |
|----------------------|-----------------|-----------------|---|------|-----------------|---------|--------|------|-----------------|-----------------|-----------------|-----------------|-----------------|
| China                | NA <sup>d</sup> | NA <sup>d</sup> | 4 | 2.48 | 0.16            | 0.04    | 0.61   | 0    | 0.5             | 0               | NA <sup>d</sup> | NA <sup>d</sup> | 80.55           |
| Colombia             | NA <sup>d</sup> | NA <sup>d</sup> | 1 | 2.29 | NA <sup>d</sup> | 640.63  | 24.75  | 1.98 | -6.8            | 3.9             | 1               | 9.5             | NA <sup>d</sup> |
| Egypt                | NA <sup>d</sup> | NA <sup>d</sup> | 2 | 2.67 | NA <sup>d</sup> | 21.65   | 19.11  | 4.43 | -3.6            | -0.8            | 0               | 19.4            | NA <sup>d</sup> |
| Greece               | NA <sup>d</sup> | NA <sup>d</sup> | 3 | 2.86 | 0.01            | 322.16  | 31.9   | 7.24 | -7.8            | -0.7            | 0               | NA <sup>d</sup> | 56.99           |
| Hong Kong            | NA <sup>d</sup> | NA <sup>d</sup> | 2 | 2.67 | NA <sup>d</sup> | 33.77   | 40.1   | 1.54 | 0.2             | 3.3             | 0               | 8.5             | NA <sup>d</sup> |
| India                | NA <sup>d</sup> | NA <sup>d</sup> | 2 | 2.86 | NA <sup>d</sup> | 59.7    | 8.71   | 1.38 | -2.8            | 1.5             | 0               | 14.9            | NA <sup>d</sup> |
| Indonesia            | NA <sup>d</sup> | NA <sup>d</sup> | 4 | 2.48 | NA <sup>d</sup> | 74.7    | 37.91  | 2.54 | -7.16           | NA <sup>d</sup> | 1               | 24.4            | NA <sup>d</sup> |
| Ireland              | NA <sup>d</sup> | NA <sup>d</sup> | 2 | 2.48 | 0.02            | 389.55  | 26.51  | 0.96 | -4.4            | 1.5             | NA <sup>d</sup> | NA <sup>d</sup> | 62.73           |
| Israel               | NA <sup>d</sup> | NA <sup>d</sup> | 3 | 2.86 | 5.72            | 994.4   | 25.53  | 0.53 | -4.4            | 1.1             | 0               | NA <sup>d</sup> | 76.98           |
| Japan                | NA <sup>d</sup> | NA <sup>d</sup> | 4 | 2.1  | NA <sup>d</sup> | 68.67   | 58.3   | 1.4  | 0.3             | 0.8             | 0               | 16.7            | NA <sup>d</sup> |
| Malaysia             | NA <sup>d</sup> | NA <sup>d</sup> | 2 | 2.86 | NA <sup>d</sup> | 146.18  | 72.02  | 0.23 | -7              | 1.5             | 0               | 15.9            | NA <sup>d</sup> |
| Netherlands          | NA <sup>d</sup> | NA <sup>d</sup> | 3 | 2.29 | NA <sup>d</sup> | 1613.39 | 51.97  | 0.75 | -4.4            | 0.7             | 0               | 12.5            | NA <sup>d</sup> |
| New Zealand          | NA <sup>d</sup> | NA <sup>d</sup> | 4 | 2.48 | NA <sup>d</sup> | 2.14    | 5      | 0    | -2.6            | 0.8             | -1              | 6               | NA <sup>d</sup> |
| Norway               | NA <sup>d</sup> | NA <sup>d</sup> | 4 | 2.48 | 0.02            | 247.49  | 37.11  | 0.78 | -2.3            | 1               | 0               | NA <sup>d</sup> | 71.94           |
| Pakistan             | NA <sup>d</sup> | NA <sup>d</sup> | 2 | 2.86 | NA <sup>d</sup> | 36.98   | 20.4   | 2.55 | NA <sup>d</sup> | NA <sup>d</sup> | NA <sup>d</sup> | NA <sup>d</sup> | NA <sup>d</sup> |
| Peru                 | NA <sup>d</sup> | NA <sup>d</sup> | 4 | 2.86 | NA <sup>d</sup> | 159.55  | 5.47   | 6.88 | -3.6            | 7.7             | 1               | 15              | NA <sup>d</sup> |
| Philippines          | NA <sup>d</sup> | NA <sup>d</sup> | 4 | 2.67 | NA <sup>d</sup> | 38.72   | 9.83   | 2.01 | -14.9           | 4.2             | NA <sup>d</sup> | 18.1            | NA <sup>d</sup> |
| Qatar                | NA <sup>d</sup> | NA <sup>d</sup> | 4 | 2.67 | 0               | 173.58  | 3.6    | 0.16 | -3.3            | NA <sup>d</sup> | 0               | 7.1             | NA <sup>d</sup> |
| Saudi Arabia         | NA <sup>d</sup> | NA <sup>d</sup> | 4 | 2.86 | NA <sup>d</sup> | 15.46   | 1.51   | 6.08 | -3.6            | 1.7             | 0               | 15              | NA <sup>d</sup> |
| Singapore            | NA <sup>d</sup> | NA <sup>d</sup> | 4 | 2.86 | NA <sup>d</sup> | 6.51    | 0.65   | 0    | -3.4            | 1               | 0               | 19.6            | NA <sup>d</sup> |
| South Africa         | NA <sup>d</sup> | NA <sup>d</sup> | 4 | 2.86 | NA <sup>d</sup> | 450.45  | 33.82  | 2.6  | -3.7            | 3.4             | 0               | 12.2            | NA <sup>d</sup> |
| South Korea          | NA <sup>d</sup> | NA <sup>d</sup> | 2 | 2.48 | NA <sup>d</sup> | 52.89   | 78.26  | 1.44 | -3.4            | 0.8             | 0               | 9.6             | NA <sup>d</sup> |
| Spain                | NA <sup>d</sup> | NA <sup>d</sup> | 3 | 2.67 | NA <sup>d</sup> | 599.04  | 16.99  | 2.06 | -10.6           | 2.35            | 1               | 15.5            | NA <sup>d</sup> |
| Switzerland          | NA <sup>d</sup> | NA <sup>d</sup> | 1 | 2.67 | NA <sup>d</sup> | 1446.9  | 38.29  | 2.26 | -3.2            | 1               | 1               | NA <sup>d</sup> | 52.20           |
| Thailand             | NA <sup>d</sup> | NA <sup>d</sup> | 4 | 2.67 | NA <sup>d</sup> | 4.52    | 78.72  | 0.1  | -5.5            | 0.88            | -1              | 10.6            | NA <sup>d</sup> |
| Turkey               | NA <sup>d</sup> | NA <sup>d</sup> | 1 | 2.86 | NA <sup>d</sup> | 885.21  | 245.72 | 0.96 | -0.5            | -1              | 2               | 7.9             | NA <sup>d</sup> |
| United Arab Emirates | NA <sup>d</sup> | NA <sup>d</sup> | 1 | 3.05 | NA <sup>d</sup> | 393.94  | 23.07  | 0.25 | NA <sup>d</sup> | NA <sup>d</sup> | 2               | 15.9            | NA <sup>d</sup> |

|         |                 |                 |   |      |                 |      |      |   |       |      |   |     |                 |
|---------|-----------------|-----------------|---|------|-----------------|------|------|---|-------|------|---|-----|-----------------|
| Vietnam | NA <sup>d</sup> | NA <sup>d</sup> | 4 | 2.86 | NA <sup>d</sup> | 0.12 | 8.76 | 0 | -2.31 | 0.22 | 0 | 5.1 | NA <sup>d</sup> |
|---------|-----------------|-----------------|---|------|-----------------|------|------|---|-------|------|---|-----|-----------------|

Notes:

- a. Google Trends include indicators as insomnia and health literacy.
- b. Increase in Google searches for “insomnia”.
- c. Google Trends number for “wash hands” and “face mask”.
- d. NA: not applicable. Indicates a country not ranked due to incomplete data.

**Supplementary Table S23. Complete ranking and raw scores of indicators in 50 countries and territories in January 2021**

| Country      | Rank | Performance score (with Google Trends) <sup>a</sup> | Concern indicators  |                        |                            |                                                       |                           |                   |              |                       |                       |                              | Performance score (without Google Trends) |
|--------------|------|-----------------------------------------------------|---------------------|------------------------|----------------------------|-------------------------------------------------------|---------------------------|-------------------|--------------|-----------------------|-----------------------|------------------------------|-------------------------------------------|
|              |      |                                                     | Government policy   |                        |                            | Vital health and socioeconomic measures               |                           |                   |              |                       |                       | Hygiene education            |                                           |
|              |      |                                                     | Lockdown efficiency | Health-system policies | People covered by vaccines | One-month cases per 100,000 members of the population | Infection growth rate (%) | Fatality rate (%) | GDP loss (%) | Unemployment rate (%) | Insomnia <sup>b</sup> | Health literacy <sup>c</sup> |                                           |
| Taiwan       | 1    | 72.95                                               | 4                   | 2.67                   | 0                          | 0.47                                                  | 14.02                     | 0.89              | 6.41         | 0.04                  | -1                    | 18.75                        | 71.93                                     |
| Singapore    | 2    | 70.47                                               | 4                   | 3.24                   | 1.33                       | 16.02                                                 | 1.6                       | 0                 | 1.3          | 0.5                   | 1                     | 19.75                        | 73.44                                     |
| Saudi Arabia | 3    | 66.29                                               | 4                   | 3.43                   | 0.63                       | 15.32                                                 | 1.47                      | 2.85              | -2           | 0.8                   | 0                     | 14.5                         | 67.74                                     |
| Russia       | 4    | 64.50                                               | 4                   | 3.24                   | 0.34                       | 466.65                                                | 21.78                     | 2.31              | -2.1         | 1.1                   | 1                     | 25.13                        | 63.90                                     |
| Egypt        | 5    | 63.48                                               | 4                   | 2.86                   | 0                          | 27.25                                                 | 20.2                      | 6.04              | -2.1         | -0.3                  | 1                     | 28                           | 61.52                                     |
| Italy        | 6    | 63.01                                               | 3                   | 3.43                   | 1.68                       | 737.43                                                | 21.16                     | 3.22              | 5            | 0.6                   | 1                     | 21.5                         | 63.44                                     |
| Indonesia    | 7    | 62.98                                               | 4                   | 2.86                   | 0.09                       | 122.52                                                | 45.09                     | 2.35              | -2.23        | 1.32                  | 1                     | 25.5                         | 61.86                                     |
| Austria      | 8    | 62.63                                               | 3                   | 3.24                   | 1.46                       | 594.94                                                | 14.85                     | 2.8               | -1.9         | 2.7                   | 0                     | 28.125                       | 57.92                                     |
| Argentina    | 9    | 62.52                                               | 3                   | 2.86                   | 0.41                       | 667.6                                                 | 18.56                     | 1.57              | 7.7          | -0.2                  | 0                     | 5.63                         | 66.46                                     |
| India        | 10   | 61.88                                               | 2                   | 3.24                   | 0.14                       | 34.12                                                 | 4.58                      | 1.15              | -1.4         | -0.7                  | 1                     | 12.25                        | 65.61                                     |
| Sweden       | 11   | 61.80                                               | 3                   | 2.48                   | 1.67                       | 1283.04                                               | 29.63                     | 2.21              | -0.3         | 1.8                   | 0                     | 33.625                       | 54.75                                     |
| Germany      | 12   | 60.68                                               | 3                   | 2.48                   | 1.51                       | 555.16                                                | 26.42                     | 5.02              | -0.9         | 0.5                   | 1                     | 33.63                        | 55.85                                     |
| Turkey       | 13   | 59.20                                               | 2                   | 3.05                   | 1.18                       | 318.73                                                | 12.17                     | 1.9               | 2.5          | -0.5                  | 1                     | 7.75                         | 63.99                                     |
| France       | 14   | 58.25                                               | 1                   | 3.24                   | 1.26                       | 855.86                                                | 21.6                      | 1.98              | 6.7          | 0.3                   | 0                     | 11.38                        | 58.90                                     |
| Netherlands  | 15   | 58.15                                               | 3                   | 2.48                   | 1.03                       | 1072.04                                               | 22.72                     | 1.41              | -2.6         | 0.6                   | 1                     | 19.75                        | 58.04                                     |
| Finland      | 16   | 57.38                                               | 4                   | 2.48                   | 1.46                       | 164.8                                                 | 25.29                     | 1.2               | 0.1          | 1.6                   | 2                     | 6.5                          | 64.70                                     |
| Denmark      | 17   | 55.50                                               | 3                   | 3.05                   | 2.29                       | 604.95                                                | 21.35                     | 2.36              | -1.3         | 0.7                   | 1                     | 2.375                        | 61.44                                     |
| Poland       | 18   | 54.77                                               | 3                   | 2.67                   | 1.55                       | 577.35                                                | 16.87                     | 3.95              | -2.9         | 1                     | 2                     | 18.25                        | 56.90                                     |
| Hungary      | 19   | 51.87                                               | 3                   | 2.67                   | 1.55                       | 466.57                                                | 13.98                     | 6.63              | -4.2         | 0.9                   | 0                     | 5.13                         | 53.34                                     |
| Chile        | 20   | 51.50                                               | 3                   | 2.86                   | 0.18                       | 617.99                                                | 19.4                      | 1.56              | 0.1          | 2.8                   | 3                     | 10.75                        | 58.20                                     |
| Spain        | 21   | 51.23                                               | 3                   | 3.05                   | 1.72                       | 1742.82                                               | 42.26                     | 0.92              | 0            | 1.57                  | 2                     | 8.88                         | 56.09                                     |
| Brazil       | 22   | 50.84                                               | 1                   | 2.86                   | 0.49                       | 719.21                                                | 19.92                     | 1.93              | 1.3          | 3                     | 1                     | 13.63                        | 51.28                                     |
| Portugal     | 23   | 49.83                                               | 3                   | 3.05                   | 1.7                        | 3009.19                                               | 74.17                     | 1.82              | -3.1         | 0.3                   | 0                     | 12.25                        | 48.05                                     |
| United       | 24   | 49.48                                               | 3                   | 3.05                   | 7.21                       | 1962.04                                               | 53.36                     | 2.46              | -3.9         | 1.1                   | 3                     | 15.88                        | 53.70                                     |

| Kingdom              |                 |                 |   |      |                 |         |        |      |                 |                 |                 |                 |                 |
|----------------------|-----------------|-----------------|---|------|-----------------|---------|--------|------|-----------------|-----------------|-----------------|-----------------|-----------------|
| Mexico               | 25              | 47.66           | 2 | 2.86 | 0.26            | 339.84  | 30.72  | 7.47 | -2.3            | 0.9             | 3               | 21.75           | 49.16           |
| Canada               | 26              | 47.19           | 1 | 3.05 | 1.27            | 520.12  | 33.42  | 2.18 | 0.7             | 3.9             | 3               | 18.25           | 49.92           |
| Czech Republic       | 27              | 44.93           | 3 | 3.43 | 1.31            | 2484.95 | 37.03  | 1.78 | -0.3            | 1.2             | 3               | 1.25            | 53.66           |
| United States        | 28              | 43.31           | 1 | 3.05 | 4.7             | 1857.72 | 30.59  | 1.58 | 0.1             | 2.8             | 4               | 15.75           | 48.53           |
| Australia            | NA <sup>d</sup> | NA <sup>d</sup> | 4 | 2.48 | NA <sup>d</sup> | 1.54    | 1.38   | 0    | -0.5            | 1               | -1              | 11.75           | NA <sup>d</sup> |
| Belgium              | NA <sup>d</sup> | NA <sup>d</sup> | 1 | 2.86 | 1.48            | 549.26  | 9.85   | 2.46 | 1.4             | 1.3             | NA <sup>d</sup> | NA <sup>d</sup> | 55.30           |
| China                | NA <sup>d</sup> | NA <sup>d</sup> | 4 | 2.86 | 0.83            | 0.17    | 2.86   | 0.08 | 25.1            | 0.1             | NA <sup>d</sup> | NA <sup>d</sup> | 82.73           |
| Colombia             | NA <sup>d</sup> | NA <sup>d</sup> | 3 | 2.67 | NA <sup>d</sup> | 888.53  | 27.52  | 2.38 | 0.4             | 4.3             | 3               | 11              | NA <sup>d</sup> |
| Greece               | NA <sup>d</sup> | NA <sup>d</sup> | 2 | 3.43 | 1.3             | 173.72  | 13.04  | 5.29 | -1.8            | 0               | 0               | NA <sup>d</sup> | 58.23           |
| Hong Kong            | NA <sup>d</sup> | NA <sup>d</sup> | 2 | 2.67 | NA <sup>d</sup> | 21.42   | 18.16  | 2.05 | 17              | 3.6             | 2               | 8.38            | NA <sup>d</sup> |
| Ireland              | NA <sup>d</sup> | NA <sup>d</sup> | 3 | 2.86 | 2.02            | 2121.76 | 114.15 | 1.02 | 5.8             | 2.1             | NA <sup>d</sup> | NA <sup>d</sup> | 50.28           |
| Israel               | NA <sup>d</sup> | NA <sup>d</sup> | 3 | 3.43 | 28.61           | 2543.72 | 52.02  | 0.67 | -1              | 1               | 0               | NA <sup>d</sup> | 65.89           |
| Japan                | NA <sup>d</sup> | NA <sup>d</sup> | 4 | 2.1  | NA <sup>d</sup> | 122.04  | 65.46  | 1.59 | 0.5             | 0.5             | 0               | 18.5            | NA <sup>d</sup> |
| Malaysia             | NA <sup>d</sup> | NA <sup>d</sup> | 2 | 2.86 | NA <sup>d</sup> | 314.99  | 90.21  | 0.28 | -1.2            | 1.7             | 0               | 30.75           | NA <sup>d</sup> |
| New Zealand          | NA <sup>d</sup> | NA <sup>d</sup> | 4 | 2.67 | NA <sup>d</sup> | 2.94    | 6.57   | 0    | 2.4             | 0.5             | 0               | 4.63            | NA <sup>d</sup> |
| Norway               | NA <sup>d</sup> | NA <sup>d</sup> | 2 | 2.86 | 1.22            | 247.16  | 27.03  | 0.96 | -2.8            | 1.4             | 0               | NA <sup>d</sup> | 58.51           |
| Pakistan             | NA <sup>d</sup> | NA <sup>d</sup> | 4 | 2.86 | NA <sup>d</sup> | 29.09   | 13.32  | 2.35 | NA <sup>d</sup> | NA <sup>d</sup> | NA <sup>d</sup> | NA <sup>d</sup> | NA <sup>d</sup> |
| Peru                 | NA <sup>d</sup> | NA <sup>d</sup> | 4 | 2.67 | NA <sup>d</sup> | 373.35  | 12.13  | 8.72 | 7.5             | 6.7             | 0               | 21.75           | NA <sup>d</sup> |
| Philippines          | NA <sup>d</sup> | NA <sup>d</sup> | 4 | 2.67 | NA <sup>d</sup> | 47.05   | 10.87  | 2.92 | -3.5            | 3.4             | NA <sup>d</sup> | 25.88           | NA <sup>d</sup> |
| Qatar                | NA <sup>d</sup> | NA <sup>d</sup> | 4 | 3.24 | 0.87            | 260.36  | 5.22   | 0.04 | NA <sup>d</sup> | NA <sup>d</sup> | 0               | 3.25            | NA <sup>d</sup> |
| South Africa         | NA <sup>d</sup> | NA <sup>d</sup> | 3 | 2.86 | NA <sup>d</sup> | 668.7   | 37.52  | 3.96 | -3.6            | 2.5             | 1               | 13.5            | NA <sup>d</sup> |
| South Korea          | NA <sup>d</sup> | NA <sup>d</sup> | 4 | 2.86 | NA <sup>d</sup> | 32.65   | 27.1   | 3.03 | 0.4             | 1.5             | 0               | 9.25            | NA <sup>d</sup> |
| Switzerland          | NA <sup>d</sup> | NA <sup>d</sup> | 1 | 3.05 | 1.77            | 797.54  | 15.26  | 2.52 | -0.4            | 1.1             | 0               | NA <sup>d</sup> | 54.08           |
| Thailand             | NA <sup>d</sup> | NA <sup>d</sup> | 4 | 2.29 | NA <sup>d</sup> | 17.84   | 173.88 | 0.11 | -0.5            | 0.93            | 0               | 11.13           | NA <sup>d</sup> |
| United Arab Emirates | NA <sup>d</sup> | NA <sup>d</sup> | 1 | 3.05 | 16.86           | 968.48  | 46.09  | 0.19 | NA <sup>d</sup> | NA <sup>d</sup> | 0               | 19.25           | NA <sup>d</sup> |
| Vietnam              | NA <sup>d</sup> | NA <sup>d</sup> | 4 | 2.86 | NA <sup>d</sup> | 0.36    | 24.03  | 0    | 0.8             | 0.2             | 0               | 5               | NA <sup>d</sup> |

Notes:

- a. Google Trends include indicators as insomnia and health literacy.
- b. Increase in Google searches for “insomnia”.
- c. Google Trends number for “wash hands” and “face mask”.
- d. NA: not applicable. Indicates a country not ranked due to incomplete data.

**Supplementary Table S24. Complete ranking and raw scores of indicators in 50 countries and territories in February 2021**

| Country        | Rank | Performance score (with Google Trends) <sup>a</sup> | Concern indicators  |                        |                            |                                                       |                           |                   |              |                       |                       |                              | Performance score (without Google Trends) |
|----------------|------|-----------------------------------------------------|---------------------|------------------------|----------------------------|-------------------------------------------------------|---------------------------|-------------------|--------------|-----------------------|-----------------------|------------------------------|-------------------------------------------|
|                |      |                                                     | Government policy   |                        |                            | Vital health and socioeconomic measures               |                           |                   |              |                       |                       | Hygiene education            |                                           |
|                |      |                                                     | Lockdown efficiency | Health-system policies | People covered by vaccines | One-month cases per 100,000 members of the population | Infection growth rate (%) | Fatality rate (%) | GDP loss (%) | Unemployment rate (%) | Insomnia <sup>b</sup> | Health literacy <sup>c</sup> |                                           |
| Singapore      | 1    | 70.74                                               | 4                   | 3.43                   | 3.08                       | 6.84                                                  | 0.67                      | 0                 | 1.3          | 0.5                   | -1                    | 16                           | 74.15                                     |
| Taiwan         | 2    | 69.87                                               | 4                   | 2.67                   | 0                          | 0.18                                                  | 4.83                      | 2.27              | 6.41         | 0.03                  | -2                    | 18.5                         | 70.24                                     |
| India          | 3    | 68.54                                               | 4                   | 3.43                   | 0.52                       | 25.7                                                  | 3.3                       | 0.78              | -1.4         | -0.9                  | 0                     | 18.63                        | 72.70                                     |
| Saudi Arabia   | 4    | 67.47                                               | 4                   | 3.62                   | 1.12                       | 26.74                                                 | 2.53                      | 1.28              | -2           | 0.8                   | 0                     | 22                           | 70.36                                     |
| Australia      | 5    | 64.56                                               | 4                   | 2.67                   | 0.06                       | 0.63                                                  | 0.56                      | 0                 | -0.5         | 0.7                   | 0                     | 11.13                        | 69.97                                     |
| Italy          | 6    | 64.51                                               | 3                   | 3.43                   | 3.65                       | 615.65                                                | 14.58                     | 2.47              | 5            | 0.5                   | 0                     | 35.63                        | 62.58                                     |
| Denmark        | 7    | 63.87                                               | 4                   | 3.05                   | 5.19                       | 219.73                                                | 6.39                      | 1.85              | -1.3         | 0.8                   | 0                     | 17.75                        | 67.13                                     |
| New Zealand    | 8    | 61.54                                               | 4                   | 2.48                   | 0.07                       | 1.53                                                  | 3.21                      | 1.35              | 2.4          | 0.5                   | 1                     | 9.75                         | 68.69                                     |
| Canada         | 9    | 60.03                                               | 4                   | 3.05                   | 2.5                        | 231.86                                                | 11.17                     | 2.23              | 0.7          | 2.6                   | 0                     | 16.875                       | 62.59                                     |
| Argentina      | 10   | 60.01                                               | 3                   | 2.86                   | 1.13                       | 398.55                                                | 9.35                      | 2.22              | 7.7          | -0.2                  | 0                     | 7.38                         | 65.40                                     |
| South Korea    | 11   | 59.46                                               | 4                   | 2.86                   | 0.02                       | 22.48                                                 | 14.68                     | 1.56              | 0.4          | 0.6                   | 0                     | 6.75                         | 64.91                                     |
| Japan          | 12   | 58.55                                               | 4                   | 2.29                   | 0.01                       | 33.15                                                 | 10.75                     | 5.09              | 0.5          | 0.5                   | 0                     | 16.38                        | 60.89                                     |
| Netherlands    | 13   | 56.45                                               | 3                   | 2.67                   | 4.05                       | 650.66                                                | 11.24                     | 1.42              | -2.6         | 0.7                   | 0                     | 14.88                        | 58.71                                     |
| Poland         | 14   | 56.44                                               | 3                   | 2.67                   | 4.41                       | 511.54                                                | 12.79                     | 3.4               | -2.9         | 1                     | 0                     | 22.38                        | 56.45                                     |
| Sweden         | 15   | 56.38                                               | 3                   | 2.48                   | 4.28                       | 894.64                                                | 15.94                     | 1.37              | -0.3         | 1.5                   | 0                     | 26.25                        | 55.22                                     |
| Turkey         | 16   | 56.32                                               | 2                   | 3.24                   | 5.07                       | 265.74                                                | 9.05                      | 1.15              | 2.5          | 0.5                   | 1                     | 6.5                          | 63.14                                     |
| Hong Kong      | 17   | 55.75                                               | 2                   | 2.67                   | 0.14                       | 7.38                                                  | 5.29                      | 3.25              | 17           | 3.5                   | 1                     | 7.5                          | 62.13                                     |
| United Kingdom | 18   | 55.38                                               | 3                   | 3.05                   | 15.53                      | 531.24                                                | 9.42                      | 4.64              | -3.9         | 0.9                   | 1                     | 13                           | 60.02                                     |
| Finland        | 19   | 54.96                                               | 4                   | 2.48                   | 4.08                       | 224.41                                                | 27.49                     | 0.57              | 0.1          | 1.2                   | 0                     | 5.5                          | 59.66                                     |
| Austria        | 20   | 54.17                                               | 3                   | 3.43                   | 3.92                       | 500.11                                                | 10.87                     | 1.86              | -1.9         | 2.6                   | 1                     | 11.5                         | 58.96                                     |
| Germany        | 21   | 54.08                                               | 2                   | 2.48                   | 3.76                       | 268.11                                                | 10.09                     | 5.78              | -0.9         | 0.4                   | -1                    | 13.63                        | 54.04                                     |
| Thailand       | 22   | 53.85                                               | 4                   | 2.29                   | 0                          | 9.19                                                  | 32.69                     | 0.09              | -0.5         | 0.93                  | 0                     | 6                            | 58.12                                     |
| Mexico         | 23   | 53.63                                               | 4                   | 3.05                   | 0.95                       | 172.71                                                | 11.94                     | 12.21             | -2.3         | 0.8                   | 0                     | 20.63                        | 53.46                                     |
| Chile          | 24   | 53.62                                               | 3                   | 3.05                   | 8.82                       | 510.12                                                | 13.41                     | 2.17              | 0.1          | 2.5                   | 1                     | 9.375                        | 58.91                                     |

|                      |                 |                 |   |      |                 |         |       |       |                 |                 |                 |                 |                 |
|----------------------|-----------------|-----------------|---|------|-----------------|---------|-------|-------|-----------------|-----------------|-----------------|-----------------|-----------------|
| Malaysia             | 25              | 53.24           | 3 | 2.86 | 0.03            | 265.07  | 39.91 | 0.43  | -1.2            | 1.5             | 0               | 25.13           | 51.63           |
| Portugal             | 26              | 53.18           | 3 | 3.24 | 4.47            | 824.25  | 11.66 | 4.56  | -3.1            | 0.3             | 0               | 7.88            | 56.72           |
| France               | 27              | 53.16           | 1 | 3.43 | 3.48            | 828.42  | 17.19 | 1.85  | 6.7             | 0.3             | 0               | 10.25           | 55.98           |
| Indonesia            | 28              | 52.73           | 2 | 3.24 | 0.49            | 93.71   | 23.77 | 2.41  | -2.23           | 1.32            | 1               | 23.25           | 53.64           |
| South Africa         | 29              | 51.95           | 4 | 3.05 | 0.06            | 100.55  | 4.1   | 9.77  | -3.6            | 2.5             | 1               | 13.88           | 55.47           |
| Spain                | 30              | 51.46           | 3 | 3.05 | 4.1             | 952.7   | 16.24 | 2.43  | 0               | 1.57            | 2               | 18.75           | 55.48           |
| Hungary              | 31              | 50.03           | 3 | 2.86 | 4.85            | 631.58  | 16.6  | 4.02  | -4.2            | 1               | 0               | 3.38            | 54.13           |
| Colombia             | 32              | 49.41           | 3 | 2.67 | 0.13            | 308.17  | 7.49  | 3.69  | 0.4             | 3.7             | 3               | 18.38           | 55.12           |
| Brazil               | 33              | 47.91           | 1 | 3.43 | 1.98            | 633.48  | 14.63 | 2.26  | 1.3             | 2.8             | 1               | 12.13           | 50.95           |
| United States        | 34              | 45.03           | 1 | 3.05 | 11.36           | 725.7   | 9.15  | 2.73  | 0.1             | 2.7             | 4               | 15.25           | 52.66           |
| Peru                 | 35              | 44.24           | 3 | 2.67 | 0.49            | 562.98  | 16.31 | 10.07 | 7.5             | 7.4             | 0               | 19.75           | 41.99           |
| Czech Republic       | 36              | 43.02           | 3 | 3.43 | 3.11            | 2341.08 | 25.46 | 1.61  | -0.3            | 1.3             | 1               | 4.25            | 47.20           |
| Belgium              | NA <sup>d</sup> | NA <sup>d</sup> | 1 | 3.05 | 3.75            | 529.42  | 8.64  | 1.61  | 1.4             | 1.7             | NA <sup>d</sup> | NA <sup>d</sup> | 55.05           |
| China                | NA <sup>d</sup> | NA <sup>d</sup> | 4 | 2.86 | 1.82            | 0.02    | 0.39  | 0     | 25.1            | -0.7            | NA <sup>d</sup> | NA <sup>d</sup> | 84.12           |
| Egypt                | NA <sup>d</sup> | NA <sup>d</sup> | 4 | 3.05 | NA <sup>d</sup> | 16.1    | 9.93  | 8.33  | -2.1            | -0.3            | 0               | 15.25           | NA <sup>d</sup> |
| Greece               | NA <sup>d</sup> | NA <sup>d</sup> | 2 | 3.24 | 4.25            | 327.57  | 21.75 | 2.07  | -1.8            | 0.2             | 0               | NA <sup>d</sup> | 56.25           |
| Ireland              | NA <sup>d</sup> | NA <sup>d</sup> | 3 | 3.05 | 4.45            | 466.71  | 11.72 | 4.39  | 5.8             | 2.7             | NA <sup>d</sup> | NA <sup>d</sup> | 58.37           |
| Israel               | NA <sup>d</sup> | NA <sup>d</sup> | 3 | 3.62 | 46.88           | 1529.33 | 20.57 | 0.72  | -1              | 1.7             | 0               | NA <sup>d</sup> | 65.35           |
| Norway               | NA <sup>d</sup> | NA <sup>d</sup> | 2 | 2.86 | 4.73            | 148.31  | 12.77 | 0.72  | -2.8            | 1.4             | 0               | NA <sup>d</sup> | 58.14           |
| Pakistan             | NA <sup>d</sup> | NA <sup>d</sup> | 4 | 3.05 | 0.02            | 15.82   | 6.39  | 3.47  | NA <sup>d</sup> | NA <sup>d</sup> | NA <sup>d</sup> | NA <sup>d</sup> | NA <sup>d</sup> |
| Philippines          | NA <sup>d</sup> | NA <sup>d</sup> | 2 | 2.67 | 0               | 46.3    | 9.65  | 3.09  | -3.5            | 3.4             | NA <sup>d</sup> | 44.88           | 52.08           |
| Qatar                | NA <sup>d</sup> | NA <sup>d</sup> | 1 | 3.62 | 2.43            | 427.93  | 8.15  | 0.08  | NA <sup>d</sup> | NA <sup>d</sup> | 0               | 3.13            | NA <sup>d</sup> |
| Russia               | NA <sup>d</sup> | NA <sup>d</sup> | 1 | 2.67 | NA <sup>d</sup> | 267.28  | 10.24 | 3.25  | -2.1            | 1.1             | 0               | 28.75           | NA <sup>d</sup> |
| Switzerland          | NA <sup>d</sup> | NA <sup>d</sup> | 1 | 3.05 | 4.67            | 388.37  | 6.45  | 1.74  | -0.4            | 1.1             | 1               | NA <sup>d</sup> | 56.74           |
| United Arab Emirates | NA <sup>d</sup> | NA <sup>d</sup> | 1 | 3.43 | 30.44           | 888.89  | 28.96 | 0.42  | NA <sup>d</sup> | NA <sup>d</sup> | 0               | 10.63           | NA <sup>d</sup> |
| Vietnam              | NA <sup>d</sup> | NA <sup>d</sup> | 2 | 2.67 | NA <sup>d</sup> | 0.65    | 34.73 | 0     | 0.8             | 0.2             | 0               | 6.5             | NA <sup>d</sup> |

Notes:

- a. Google Trends include indicators as insomnia and health literacy.
- b. Increase in Google searches for “insomnia”.
- c. Google Trends number for “wash hands” and “face mask”.

d. NA: not applicable. Indicates a country not ranked due to incomplete data.



**Supplementary Table S25. Complete ranking and raw scores of indicators in 50 countries and territories in March 2021**

| Country        | Rank | Performance score<br>(with Google<br>Trends) <sup>a</sup> | Concern indicators     |                               |                                  |                                                                   |                                 |                      |                    |                          |                       |                                 | Performance<br>score (without<br>Google Trends) |
|----------------|------|-----------------------------------------------------------|------------------------|-------------------------------|----------------------------------|-------------------------------------------------------------------|---------------------------------|----------------------|--------------------|--------------------------|-----------------------|---------------------------------|-------------------------------------------------|
|                |      |                                                           | Government policy      |                               |                                  | Vital health and socioeconomic measures                           |                                 |                      |                    |                          |                       | Hygiene<br>education            |                                                 |
|                |      |                                                           | Lockdown<br>efficiency | Health-s<br>ystem<br>policies | People<br>covered by<br>vaccines | One-month<br>cases per<br>100,000<br>members of<br>the population | Infection<br>growth rate<br>(%) | Fatality<br>rate (%) | GDP<br>loss<br>(%) | Unemployment<br>rate (%) | Insomnia <sup>b</sup> | Health<br>literacy <sup>c</sup> |                                                 |
| Singapore      | 1    | 68.77                                                     | 4                      | 3.43                          | 11.27                            | 7.61                                                              | 0.74                            | 0.22                 | 1.3                | 0.5                      | 0                     | 13.6                            | 73.61                                           |
| South Korea    | 2    | 65.57                                                     | 4                      | 3.24                          | 0.87                             | 26.54                                                             | 15.11                           | 0.96                 | 0.4                | 0.1                      | -1                    | 15.1                            | 66.53                                           |
| Taiwan         | 3    | 64.82                                                     | 4                      | 2.67                          | 0.03                             | 0.31                                                              | 7.85                            | 1.33                 | 6.41               | -0.04                    | 0                     | 13.4                            | 68.77                                           |
| Saudi Arabia   | 4    | 64.58                                                     | 4                      | 3.81                          | 6.37                             | 36.26                                                             | 3.35                            | 1.39                 | -2                 | 0.8                      | 1                     | 16                              | 69.94                                           |
| Australia      | 5    | 63.51                                                     | 4                      | 2.86                          | 1.31                             | 1.35                                                              | 1.19                            | 0                    | -0.5               | 0.4                      | 0                     | 8.1                             | 69.20                                           |
| Egypt          | 6    | 63.12                                                     | 4                      | 3.43                          | 0.08                             | 19.26                                                             | 10.8                            | 6.63                 | -2.1               | -0.3                     | 0                     | 27.1                            | 61.28                                           |
| New Zealand    | 7    | 62.82                                                     | 4                      | 2.67                          | 0.76                             | 2.55                                                              | 5.17                            | 0                    | 2.4                | 0.5                      | 0                     | 7.3                             | 68.64                                           |
| Russia         | 8    | 62.74                                                     | 4                      | 2.67                          | 3.9                              | 202.72                                                            | 7.05                            | 4.23                 | -2.1               | 0.7                      | 0                     | 26.1                            | 61.20                                           |
| Canada         | 9    | 62.72                                                     | 4                      | 3.24                          | 7.54                             | 313.31                                                            | 13.57                           | 0.82                 | 0.7                | -0.3                     | 1                     | 15.5                            | 67.81                                           |
| Hong Kong      | 10   | 62.12                                                     | 2                      | 3.43                          | 3.37                             | 6.16                                                              | 4.2                             | 1.3                  | 17                 | 2.6                      | 0                     | 7.2                             | 67.81                                           |
| Vietnam        | 11   | 62.10                                                     | 4                      | 2.86                          | 0.03                             | 0.16                                                              | 6.33                            | 0                    | 0.8                | 0.2                      | 0                     | 5.4                             | 68.49                                           |
| Thailand       | 12   | 61.77                                                     | 4                      | 2.1                           | 0.13                             | 4.06                                                              | 10.88                           | 0.39                 | -0.5               | 0.93                     | -2                    | 5.2                             | 63.15                                           |
| Argentina      | 13   | 61.24                                                     | 3                      | 3.05                          | 4.31                             | 534.24                                                            | 11.46                           | 1.61                 | 7.7                | -0.2                     | 0                     | 11.8                            | 64.91                                           |
| India          | 14   | 60.82                                                     | 4                      | 3.62                          | 2.36                             | 80.39                                                             | 9.98                            | 0.52                 | -1.4               | -2.3                     | 2                     | 6                               | 71.65                                           |
| Austria        | 15   | 60.11                                                     | 3                      | 3.43                          | 9.55                             | 963.64                                                            | 18.89                           | 0.9                  | -1.9               | -2.8                     | 0                     | 12.2                            | 63.33                                           |
| Malaysia       | 16   | 59.98                                                     | 2                      | 3.24                          | 1.09                             | 138.26                                                            | 14.88                           | 0.32                 | -1.2               | 0.8                      | 0                     | 22.8                            | 59.04                                           |
| Japan          | 17   | 59.78                                                     | 4                      | 2.29                          | 0.4                              | 33.64                                                             | 9.85                            | 2.98                 | 0.5                | 0.1                      | 0                     | 13.2                            | 62.54                                           |
| United Kingdom | 18   | 59.51                                                     | 2                      | 3.24                          | 26.27                            | 252.12                                                            | 4.09                            | 2.26                 | -3.9               | 0.8                      | 0                     | 10.4                            | 63.30                                           |
| Germany        | 19   | 58.69                                                     | 3                      | 2.67                          | 8.44                             | 469.48                                                            | 16.05                           | 1.64                 | -0.9               | 0.2                      | -1                    | 10.8                            | 59.62                                           |
| Portugal       | 20   | 57.80                                                     | 2                      | 3.43                          | 8.69                             | 168.29                                                            | 2.13                            | 3.09                 | -3.1               | 0.3                      | 0                     | 10.8                            | 61.00                                           |
| Italy          | 21   | 57.77                                                     | 3                      | 3.43                          | 8.66                             | 1090.99                                                           | 22.55                           | 1.77                 | 5                  | 2.7                      | 0                     | 20.9                            | 57.01                                           |
| Indonesia      | 22   | 57.36                                                     | 2                      | 3.43                          | 2.13                             | 64.74                                                             | 13.27                           | 2.65                 | -2.23              | 1.32                     | 0                     | 19.7                            | 56.98                                           |
| Turkey         | 23   | 56.77                                                     | 3                      | 3.24                          | 9.39                             | 729.9                                                             | 22.79                           | 0.48                 | 2.5                | 0.2                      | 0                     | 6.2                             | 61.51                                           |

|                      |                 |                 |   |      |       |         |       |       |                 |                 |                 |                 |                 |
|----------------------|-----------------|-----------------|---|------|-------|---------|-------|-------|-----------------|-----------------|-----------------|-----------------|-----------------|
| France               | 24              | 56.28           | 3 | 3.43 | 8.62  | 1316.42 | 23.31 | 1.04  | 6.7             | 0.3             | 0               | 7.9             | 60.23           |
| South Africa         | 25              | 54.40           | 4 | 3.05 | 0.22  | 58.62   | 2.3   | 8.21  | -3.6            | 2.5             | 0               | 12.1            | 56.24           |
| Netherlands          | 26              | 54.18           | 3 | 2.86 | 7.26  | 1104.43 | 17.15 | 0.53  | -2.6            | 0.6             | 0               | 9.9             | 56.82           |
| Chile                | 27              | 53.86           | 3 | 3.24 | 27.46 | 894.07  | 20.73 | 1.5   | 0.1             | 2.2             | 2               | 12              | 60.61           |
| Sweden               | 28              | 53.09           | 3 | 2.67 | 8.15  | 1461.26 | 22.45 | 0.43  | -0.3            | 2.9             | 0               | 19.2            | 51.83           |
| Denmark              | 29              | 52.31           | 1 | 3.05 | 9.65  | 335.14  | 9.16  | 0.3   | -1.3            | 0.3             | 1               | 6.7             | 58.24           |
| Colombia             | 30              | 51.82           | 2 | 2.67 | 2.2   | 304.01  | 6.87  | 2.36  | 0.4             | 1.6             | 1               | 10.4            | 56.18           |
| Spain                | 31              | 51.03           | 3 | 3.05 | 8.59  | 204.9   | 3     | 6.59  | 0               | 1.57            | 2               | 8.3             | 58.52           |
| United States        | 32              | 50.87           | 1 | 3.24 | 22.7  | 547.93  | 6.33  | 2.07  | 0.1             | 1.6             | 3               | 14.3            | 58.47           |
| Mexico               | 33              | 50.65           | 4 | 3.05 | 3.04  | 117.85  | 7.28  | 11.51 | -2.3            | 1               | 1               | 11.8            | 54.18           |
| Peru                 | 34              | 50.39           | 3 | 3.05 | 1.58  | 682.23  | 16.99 | 9.3   | 7.5             | 7.5             | 0               | 29.2            | 44.54           |
| Brazil               | 35              | 49.49           | 3 | 3.43 | 4.51  | 1033.82 | 20.83 | 3.03  | 1.3             | 2.5             | 3               | 21.1            | 54.08           |
| Poland               | 36              | 49.46           | 3 | 2.67 | 8.28  | 1624.27 | 36.01 | 1.51  | -2.9            | 1               | 0               | 17.7            | 47.88           |
| Finland              | 37              | 46.86           | 1 | 2.86 | 8.86  | 356.99  | 34.3  | 0.52  | 0.1             | 0.8             | 0               | 1.2             | 51.07           |
| Czech Republic       | 38              | 45.10           | 3 | 3.62 | 8.09  | 2771.99 | 24.03 | 2.05  | -0.3            | 1.2             | 0               | 1.4             | 48.80           |
| Hungary              | 39              | 41.74           | 3 | 3.05 | 14.77 | 2317.04 | 52.22 | 2.57  | -4.2            | 0.8             | 0               | 8.1             | 41.98           |
| Belgium              | NA <sup>d</sup> | NA <sup>d</sup> | 1 | 3.05 | 8.56  | 957.25  | 14.38 | 0.85  | 1.4             | 1.9             | NA <sup>d</sup> | NA <sup>d</sup> | 52.56           |
| China                | NA <sup>d</sup> | NA <sup>d</sup> | 4 | 2.86 | 4.16  | 0.02    | 0.34  | 0     | 25.1            | -0.6            | NA <sup>d</sup> | NA <sup>d</sup> | 82.16           |
| Greece               | NA <sup>d</sup> | NA <sup>d</sup> | 3 | 3.62 | 8.15  | 696.43  | 37.98 | 2.19  | -1.8            | 1               | 0               | NA <sup>d</sup> | 54.26           |
| Ireland              | NA <sup>d</sup> | NA <sup>d</sup> | 2 | 3.24 | 8.76  | 329.34  | 7.41  | 2.26  | 5.8             | 2.7             | NA <sup>d</sup> | NA <sup>d</sup> | 60.21           |
| Israel               | NA <sup>d</sup> | NA <sup>d</sup> | 1 | 3.81 | 58.02 | 661.98  | 7.39  | 0.8   | -1              | 1.8             | 1               | NA <sup>d</sup> | 67.76           |
| Norway               | NA <sup>d</sup> | NA <sup>d</sup> | 3 | 3.05 | 9.25  | 462.5   | 35.31 | 0.2   | -2.8            | 1.4             | 1               | NA <sup>d</sup> | 55.67           |
| Pakistan             | NA <sup>d</sup> | NA <sup>d</sup> | 4 | 3.24 | 0.18  | 41.45   | 15.75 | 1.78  | NA <sup>d</sup> | NA <sup>d</sup> | NA <sup>d</sup> | NA <sup>d</sup> | NA <sup>d</sup> |
| Philippines          | NA <sup>d</sup> | NA <sup>d</sup> | 2 | 2.86 | 0.34  | 155.99  | 29.66 | 0.57  | -3.5            | 3.4             | NA <sup>d</sup> | 33.2            | 49.64           |
| Qatar                | NA <sup>d</sup> | NA <sup>d</sup> | 1 | 3.62 | 14.17 | 565.76  | 9.96  | 0.2   | NA <sup>d</sup> | NA <sup>d</sup> | 3               | 9.6             | NA <sup>d</sup> |
| Switzerland          | NA <sup>d</sup> | NA <sup>d</sup> | 1 | 3.05 | 8.98  | 533.73  | 8.32  | 0.8   | -0.4            | 0.5             | 0               | NA <sup>d</sup> | 57.00           |
| United Arab Emirates | NA <sup>d</sup> | NA <sup>d</sup> | 1 | 3.62 | 42    | 706.95  | 17.86 | 0.39  | NA <sup>d</sup> | NA <sup>d</sup> | 1               | 16.2            | NA <sup>d</sup> |

Notes:

- a. Google Trends include indicators as insomnia and health literacy.
- b. Increase in Google searches for "insomnia".

- c. Google Trends number for “wash hands” and “face mask”.
- d. NA: not applicable. Indicates a country not ranked due to incomplete data.

**Supplementary Table S26. Complete ranking and raw scores of indicators in 50 countries and territories in April 2021**

| Country        | Rank            | Performance score (with Google Trends) <sup>a</sup> | Concern indicators  |                         |                            |                                                       |                           |                   |                 |                       |                       |                              | Performance score (without Google Trends) |
|----------------|-----------------|-----------------------------------------------------|---------------------|-------------------------|----------------------------|-------------------------------------------------------|---------------------------|-------------------|-----------------|-----------------------|-----------------------|------------------------------|-------------------------------------------|
|                |                 |                                                     | Government policy   |                         |                            | Vital health and socioeconomic measures               |                           |                   |                 |                       |                       | Hygiene education            |                                           |
|                |                 |                                                     | Lockdown efficiency | Health-syst em policies | People covered by vaccines | One-month cases per 100,000 members of the population | Infection growth rate (%) | Fatality rate (%) | GDP loss (%)    | Unemployment rate (%) | Insomnia <sup>b</sup> | Health literacy <sup>c</sup> |                                           |
| United Kingdom | 1               | 73.63                                               | 4                   | 3.24                    | 36.33                      | 106.45                                                | 1.66                      | 1.13              | 43.6            | 0.7                   | 0                     | 10.13                        | 81.31                                     |
| Singapore      | 2               | 69.91                                               | 4                   | 3.81                    | 18.92                      | 13.06                                                 | 1.27                      | 0                 | 28              | -0.1                  | 1                     | 16.88                        | 76.71                                     |
| Malaysia       | 3               | 68.16                                               | 4                   | 3.24                    | 2.25                       | 195.31                                                | 18.3                      | 0.37              | 33.3            | -0.4                  | -1                    | 18                           | 70.02                                     |
| Russia         | 4               | 67.68                                               | 4                   | 3.24                    | 6.8                        | 175.78                                                | 5.71                      | 4.32              | 18.1            | -0.6                  | 0                     | 43.75                        | 63.77                                     |
| Italy          | 5               | 63.08                                               | 3                   | 3.62                    | 16.73                      | 724.02                                                | 12.21                     | 2.62              | 35.5            | 2.8                   | 0                     | 21.63                        | 64.66                                     |
| Germany        | 6               | 61.00                                               | 3                   | 3.05                    | 17.72                      | 670.44                                                | 19.75                     | 1.16              | 20.5            | 0.1                   | -2                    | 11.75                        | 60.86                                     |
| Spain          | 7               | 60.98                                               | 3                   | 3.05                    | 17.5                       | 512.73                                                | 7.3                       | 1.15              | 41.4            | -0.07                 | 2                     | 9                            | 69.99                                     |
| Portugal       | 8               | 60.71                                               | 2                   | 3.43                    | 16.33                      | 144.86                                                | 1.8                       | 0.85              | 31.9            | 1                     | 0                     | 2.13                         | 67.56                                     |
| Austria        | 9               | 60.25                                               | 3                   | 3.43                    | 17.81                      | 806.55                                                | 13.3                      | 1.19              | 25              | -4.2                  | 0                     | 6.5                          | 65.66                                     |
| South Korea    | 10              | 59.27                                               | 4                   | 3.43                    | 3.5                        | 37.05                                                 | 18.33                     | 0.51              | 8.5             | -0.1                  | 0                     | 9                            | 63.70                                     |
| Japan          | 11              | 59.11                                               | 4                   | 2.48                    | 1.73                       | 93.79                                                 | 24.99                     | 0.88              | 17.6            | 0.2                   | 0                     | 15                           | 61.69                                     |
| Taiwan         | 12              | 58.70                                               | 4                   | 3.05                    | 0.12                       | 0.41                                                  | 9.51                      | 2.04              | 7.08            | -0.39                 | 0                     | 15                           | 61.18                                     |
| United States  | 13              | 58.60                                               | 1                   | 3.62                    | 36.28                      | 569.71                                                | 6.19                      | 1.26              | 21.2            | -8.7                  | 3                     | 14.25                        | 67.53                                     |
| France         | 14              | 58.00                                               | 3                   | 3.62                    | 16.55                      | 1439.77                                               | 20.67                     | 0.91              | 37.1            | 0.9                   | 0                     | 9.25                         | 62.03                                     |
| Vietnam        | 15              | 57.64                                               | 4                   | 3.24                    | 0.27                       | 0.33                                                  | 12.49                     | 0                 | 6.22            | -0.11                 | 0                     | 4.38                         | 63.04                                     |
| Hong Kong      | 16              | 57.24                                               | 2                   | 3.43                    | 9.43                       | 4.09                                                  | 2.68                      | 1.3               | 16.5            | 1.2                   | 0                     | 7.75                         | 61.53                                     |
| Mexico         | 17              | 53.08                                               | 4                   | 3.05                    | 7.01                       | 82.11                                                 | 4.73                      | 12.94             | 38.4            | 0                     | 3                     | 10.25                        | 61.82                                     |
| Poland         | 18              | 52.63                                               | 3                   | 2.86                    | 15.15                      | 1242.98                                               | 20.26                     | 3.07              | 19.2            | 0.5                   | 0                     | 16.38                        | 53.18                                     |
| Czech Republic | 19              | 49.22                                               | 1                   | 3.43                    | 14.91                      | 919.1                                                 | 6.42                      | 2.89              | 18.6            | 0.7                   | 0                     | 5.5                          | 52.18                                     |
| Sweden         | 20              | 44.61                                               | 1                   | 2.67                    | 15.69                      | 1670.6                                                | 20.96                     | 0.35              | 17.7            | 1.2                   | 1                     | 16.75                        | 45.12                                     |
| Argentina      | NA <sup>d</sup> | NA <sup>d</sup>                                     | 3                   | 3.24                    | 8.7                        | 1390.71                                               | 26.76                     | 1.27              | NA <sup>d</sup> | NA <sup>d</sup>       | 0                     | 12.38                        | NA <sup>d</sup>                           |
| Australia      | NA <sup>d</sup> | NA <sup>d</sup>                                     | 4                   | 3.24                    | 4.27                       | 1.92                                                  | 1.67                      | 0.2               | NA <sup>d</sup> | -0.9                  | -1                    | 10                           | NA <sup>d</sup>                           |

|              |                 |                 |   |      |       |         |        |      |                 |                 |                 |                 |                 |
|--------------|-----------------|-----------------|---|------|-------|---------|--------|------|-----------------|-----------------|-----------------|-----------------|-----------------|
| Belgium      | NA <sup>d</sup> | NA <sup>d</sup> | 1 | 3.24 | 17.06 | 929.94  | 12.21  | 1.13 | 28.5            | 1.8             | NA <sup>d</sup> | NA <sup>d</sup> | 55.62           |
| Brazil       | NA <sup>d</sup> | NA <sup>d</sup> | 3 | 3.62 | 10.04 | 898.7   | 14.98  | 4.31 | NA <sup>d</sup> | 2.1             | 4               | 20.13           | NA <sup>d</sup> |
| Canada       | NA <sup>d</sup> | NA <sup>d</sup> | 3 | 3.24 | 17.78 | 635.4   | 24.24  | 0.53 | NA <sup>d</sup> | -4.9            | 0               | 18.25           | NA <sup>d</sup> |
| Chile        | NA <sup>d</sup> | NA <sup>d</sup> | 3 | 3.43 | 39.05 | 1060.39 | 20.36  | 1.59 | NA <sup>d</sup> | 1.2             | 0               | 15.5            | NA <sup>d</sup> |
| China        | NA <sup>d</sup> | NA <sup>d</sup> | 4 | 3.43 | 9.21  | 0.03    | 0.5    | 0    | 4.7             | -0.9            | NA <sup>d</sup> | NA <sup>d</sup> | 66.66           |
| Colombia     | NA <sup>d</sup> | NA <sup>d</sup> | 3 | 3.05 | 4.9   | 890.96  | 18.84  | 2.27 | NA <sup>d</sup> | -4.7            | 1               | 13.38           | NA <sup>d</sup> |
| Denmark      | NA <sup>d</sup> | NA <sup>d</sup> | 1 | 3.05 | 17.08 | 344.5   | 8.63   | 0.32 | NA <sup>d</sup> | -0.9            | 0               | 20.88           | NA <sup>d</sup> |
| Egypt        | NA <sup>d</sup> | NA <sup>d</sup> | 4 | 3.05 | 0.32  | 24.84   | 12.58  | 5.29 | NA <sup>d</sup> | -2.3            | 0               | 7.13            | NA <sup>d</sup> |
| Finland      | NA <sup>d</sup> | NA <sup>d</sup> | 4 | 2.86 | 16.52 | 168.86  | 12.08  | 0.75 | NA <sup>d</sup> | 0.9             | -1              | 2.5             | NA <sup>d</sup> |
| Greece       | NA <sup>d</sup> | NA <sup>d</sup> | 3 | 3.43 | 14.86 | 780.42  | 30.85  | 2.81 | NA <sup>d</sup> | 1.2             | 0               | NA <sup>d</sup> | NA <sup>d</sup> |
| Hungary      | NA <sup>d</sup> | NA <sup>d</sup> | 3 | 3.43 | 30.91 | 1313.77 | 19.45  | 5.36 | NA <sup>d</sup> | 0.6             | 0               | 3.5             | NA <sup>d</sup> |
| India        | NA <sup>d</sup> | NA <sup>d</sup> | 2 | 3.81 | 5.51  | 503.14  | 56.81  | 0.7  | NA <sup>d</sup> | -15.5           | 0               | 11.13           | NA <sup>d</sup> |
| Indonesia    | NA <sup>d</sup> | NA <sup>d</sup> | 2 | 3.43 | 3.67  | 57.27   | 10.36  | 2.98 | 12.39           | NA <sup>d</sup> | 1               | 17.25           | NA <sup>d</sup> |
| Ireland      | NA <sup>d</sup> | NA <sup>d</sup> | 2 | 3.24 | 15.93 | 263.6   | 5.52   | 1.66 | NA <sup>d</sup> | 2.6             | NA <sup>d</sup> | NA <sup>d</sup> | NA <sup>d</sup> |
| Israel       | NA <sup>d</sup> | NA <sup>d</sup> | 4 | 3.81 | 60.38 | 62.11   | 0.65   | 2.86 | NA <sup>d</sup> | 1.7             | 1               | NA <sup>d</sup> | NA <sup>d</sup> |
| Netherlands  | NA <sup>d</sup> | NA <sup>d</sup> | 3 | 2.86 | 14.74 | 1343.27 | 17.8   | 0.31 | NA <sup>d</sup> | 0               | 0               | 11.75           | NA <sup>d</sup> |
| New Zealand  | NA <sup>d</sup> | NA <sup>d</sup> | 4 | 2.86 | 2.86  | 2.32    | 4.48   | 0    | NA <sup>d</sup> | 0               | 1               | 5.63            | NA <sup>d</sup> |
| Norway       | NA <sup>d</sup> | NA <sup>d</sup> | 3 | 3.05 | 16.5  | 311.57  | 17.58  | 0.49 | NA <sup>d</sup> | 0.5             | 0               | NA <sup>d</sup> | NA <sup>d</sup> |
| Pakistan     | NA <sup>d</sup> | NA <sup>d</sup> | 2 | 3.24 | 0.48  | 69.08   | 22.68  | 2.25 | NA <sup>d</sup> | NA <sup>d</sup> | NA <sup>d</sup> | NA <sup>d</sup> | NA <sup>d</sup> |
| Peru         | NA <sup>d</sup> | NA <sup>d</sup> | 3 | 3.24 | 2.75  | 760.16  | 16.18  | 9.29 | NA <sup>d</sup> | 6.1             | 0               | 34.13           | NA <sup>d</sup> |
| Philippines  | NA <sup>d</sup> | NA <sup>d</sup> | 2 | 3.43 | 0.88  | 264.8   | 38.83  | 1.36 | 28.8            | -9              | NA <sup>d</sup> | 25.13           | 64.11           |
| Qatar        | NA <sup>d</sup> | NA <sup>d</sup> | 3 | 3.81 | 27.01 | 891.62  | 14.27  | 0.65 | NA <sup>d</sup> | NA <sup>d</sup> | 0               | 13.75           | NA <sup>d</sup> |
| Saudi Arabia | NA <sup>d</sup> | NA <sup>d</sup> | 4 | 3.81 | 13.42 | 78.58   | 7.01   | 1.05 | 8.5             | NA <sup>d</sup> | 0               | 15.38           | NA <sup>d</sup> |
| South Africa | NA <sup>d</sup> | NA <sup>d</sup> | 4 | 3.05 | 0.27  | 55.73   | 2.13   | 4.55 | NA <sup>d</sup> | NA <sup>d</sup> | 0               | 13.38           | NA <sup>d</sup> |
| Switzerland  | NA <sup>d</sup> | NA <sup>d</sup> | 1 | 3.43 | 16.32 | 679.98  | 9.79   | 0.5  | NA <sup>d</sup> | 0               | 0               | NA <sup>d</sup> | NA <sup>d</sup> |
| Thailand     | NA <sup>d</sup> | NA <sup>d</sup> | 4 | 2.1  | 1.06  | 51.99   | 125.73 | 0.3  | 19.6            | NA <sup>d</sup> | 1               | 9.5             | NA <sup>d</sup> |
| Turkey       | NA <sup>d</sup> | NA <sup>d</sup> | 3 | 3.43 | 13.53 | 1782.58 | 45.32  | 0.57 | NA <sup>d</sup> | 0.3             | 0               | 6.5             | NA <sup>d</sup> |

|                      |                 |                 |   |      |       |        |       |      |                 |                 |   |     |                 |
|----------------------|-----------------|-----------------|---|------|-------|--------|-------|------|-----------------|-----------------|---|-----|-----------------|
| United Arab Emirates | NA <sup>d</sup> | NA <sup>d</sup> | 1 | 3.62 | 53.32 | 594.44 | 12.74 | 0.15 | NA <sup>d</sup> | NA <sup>d</sup> | 0 | 5.5 | NA <sup>d</sup> |
|----------------------|-----------------|-----------------|---|------|-------|--------|-------|------|-----------------|-----------------|---|-----|-----------------|

Notes:

- a. Google Trends include indicators as insomnia and health literacy.
- b. Increase in Google searches for “insomnia”.
- c. Google Trends number for “wash hands” and “face mask”.
- d. NA: not applicable. Indicates a country not ranked due to incomplete data.

**Supplementary Table S27. Complete ranking and raw scores of indicators in 50 countries and territories in May 2021**

| Country        | Rank            | Performance score (with Google Trends) <sup>a</sup> | Concern indicators  |                        |                            |                                                       |                           |                   |                 |                       |                       |                              | Performance score (without Google Trends) |
|----------------|-----------------|-----------------------------------------------------|---------------------|------------------------|----------------------------|-------------------------------------------------------|---------------------------|-------------------|-----------------|-----------------------|-----------------------|------------------------------|-------------------------------------------|
|                |                 |                                                     | Government policy   |                        |                            | Vital health and socioeconomic measures               |                           |                   |                 |                       |                       | Hygiene education            |                                           |
|                |                 |                                                     | Lockdown efficiency | Health-system policies | People covered by vaccines | One-month cases per 100,000 members of the population | Infection growth rate (%) | Fatality rate (%) | GDP loss (%)    | Unemployment rate (%) | Insomnia <sup>b</sup> | Health literacy <sup>c</sup> |                                           |
| Singapore      | 1               | 78.53                                               | 4                   | 3.81                   | 34.59                      | 15.49                                                 | 1.48                      | 0.33              | 28              | -0.1                  | 0                     | 30.5                         | 77.61                                     |
| United Kingdom | 2               | 76.81                                               | 4                   | 3.43                   | 48.03                      | 104.56                                                | 1.6                       | 0.38              | 43.6            | 0.7                   | 0                     | 10.13                        | 82.50                                     |
| Austria        | 3               | 68.77                                               | 3                   | 3.43                   | 28.88                      | 288.07                                                | 4.19                      | 1.53              | 25              | -3.8                  | 0                     | 11.88                        | 71.85                                     |
| Spain          | 4               | 68.61                                               | 3                   | 3.05                   | 29                         | 330.05                                                | 4.38                      | 1.13              | 41.4            | -0.07                 | 0                     | 10.5                         | 72.12                                     |
| Italy          | 5               | 66.96                                               | 3                   | 3.62                   | 29.2                       | 322.8                                                 | 4.85                      | 2.73              | 35.5            | 1.7                   | 0                     | 15.38                        | 68.37                                     |
| United States  | 6               | 65.77                                               | 1                   | 3.62                   | 44.55                      | 276.96                                                | 2.83                      | 1.98              | 21.2            | -7.5                  | 2                     | 16.38                        | 71.55                                     |
| Russia         | 7               | 65.26                                               | 4                   | 3.24                   | 9.77                       | 180.05                                                | 5.53                      | 4.25              | 18.1            | -1.2                  | 0                     | 23.88                        | 63.31                                     |
| Portugal       | 8               | 64.14                                               | 2                   | 3.62                   | 28.34                      | 123.57                                                | 1.51                      | 0.4               | 31.9            | 1                     | 0                     | 4                            | 68.80                                     |
| Malaysia       | 9               | 63.94                                               | 3                   | 3.43                   | 4.68                       | 505.6                                                 | 40.04                     | 0.79              | 33.3            | -0.8                  | 1                     | 20.75                        | 65.25                                     |
| South Korea    | 10              | 63.26                                               | 4                   | 3.43                   | 7.77                       | 35.43                                                 | 14.81                     | 0.73              | 8.5             | -0.5                  | 0                     | 13.13                        | 64.54                                     |
| Germany        | 11              | 62.23                                               | 3                   | 3.05                   | 30.26                      | 339.63                                                | 8.36                      | 1.93              | 20.5            | -0.1                  | 0                     | 9.13                         | 64.63                                     |
| Mexico         | 12              | 61.63                                               | 4                   | 3.24                   | 11.82                      | 53.51                                                 | 2.94                      | 9.66              | 38.4            | -0.2                  | 0                     | 9                            | 63.92                                     |
| France         | 13              | 60.91                                               | 1                   | 3.81                   | 27.49                      | 591.47                                                | 0.9                       | 1.25              | 37.1            | 0.9                   | 0                     | 7.25                         | 63.63                                     |
| Hong Kong      | 14              | 60.41                                               | 2                   | 3.62                   | 16.01                      | 0.89                                                  | 0.57                      | 1.49              | 16.5            | 0.1                   | 0                     | 10                           | 62.05                                     |
| Japan          | 15              | 59.33                                               | 4                   | 2.48                   | 6.59                       | 121.7                                                 | 25.95                     | 1.82              | 17.6            | 0.1                   | 1                     | 14.75                        | 61.56                                     |
| Sweden         | 16              | 58.60                                               | 3                   | 2.86                   | 26.66                      | 939.36                                                | 9.74                      | 0.42              | 17.7            | 0.8                   | 0                     | 12.38                        | 58.96                                     |
| Poland         | 17              | 57.61                                               | 2                   | 3.24                   | 26.53                      | 211.75                                                | 2.87                      | 7.79              | 19.2            | 0.1                   | -1                    | 12.88                        | 55.06                                     |
| Taiwan         | 18              | 54.75                                               | 2                   | 3.62                   | 0.67                       | 31                                                    | 654.52                    | 1.52              | 7.08            | -0.01                 | -1                    | 36.125                       | 43.43                                     |
| Czech Republic | 19              | 53.33                                               | 1                   | 3.24                   | 25.05                      | 284.94                                                | 1.87                      | 2.76              | 18.6            | 0.3                   | 0                     | 0.5                          | 56.49                                     |
| Vietnam        | 20              | 53.18                                               | 2                   | 3.24                   | 0.57                       | 4.63                                                  | 153.83                    | 0.27              | 6.22            | -0.11                 | 0                     | 9.38                         | 53.23                                     |
| Argentina      | NA <sup>d</sup> | NA <sup>d</sup>                                     | 3                   | 3.24                   | 13.56                      | 1779.86                                               | 27.02                     | 1.77              | NA <sup>d</sup> | NA <sup>d</sup>       | 0                     | 9.25                         | NA <sup>d</sup>                           |
| Australia      | NA <sup>d</sup> | NA <sup>d</sup>                                     | 4                   | 3.24                   | 8.32                       | 1.2                                                   | 1.03                      | 0                 | NA <sup>d</sup> | -2                    | 0                     | 7.13                         | NA <sup>d</sup>                           |

|              |                 |                 |   |      |       |         |        |       |                 |                 |                 |                 |                 |
|--------------|-----------------|-----------------|---|------|-------|---------|--------|-------|-----------------|-----------------|-----------------|-----------------|-----------------|
| Belgium      | NA <sup>d</sup> | NA <sup>d</sup> | 1 | 3.43 | 29.6  | 619.28  | 7.25   | 1.01  | 28.5            | 1.5             | NA <sup>d</sup> | NA <sup>d</sup> | 59.41           |
| Brazil       | NA <sup>d</sup> | NA <sup>d</sup> | 3 | 3.62 | 15.87 | 887.54  | 12.87  | 3.13  | NA <sup>d</sup> | 1.7             | 4               | 24              | NA <sup>d</sup> |
| Canada       | NA <sup>d</sup> | NA <sup>d</sup> | 3 | 3.62 | 31.61 | 425.28  | 13.06  | 0.81  | NA <sup>d</sup> | -5.5            | -1              | 14.13           | NA <sup>d</sup> |
| Chile        | NA <sup>d</sup> | NA <sup>d</sup> | 3 | 3.43 | 49.1  | 973.52  | 15.53  | 1.58  | NA <sup>d</sup> | -1.2            | 0               | 9.75            | NA <sup>d</sup> |
| China        | NA <sup>d</sup> | NA <sup>d</sup> | 4 | 3.62 | 22.98 | 0.03    | 0.5    | 0     | 4.7             | -0.9            | NA <sup>d</sup> | NA <sup>d</sup> | 68.64           |
| Colombia     | NA <sup>d</sup> | NA <sup>d</sup> | 3 | 3.24 | 9.92  | 1074.49 | 19.12  | 2.75  | NA <sup>d</sup> | -5.8            | 1               | 10.63           | NA <sup>d</sup> |
| Denmark      | NA <sup>d</sup> | NA <sup>d</sup> | 1 | 3.05 | 29.68 | 530.64  | 12.23  | 0.11  | NA <sup>d</sup> | -1.6            | 0               | 12.38           | NA <sup>d</sup> |
| Egypt        | NA <sup>d</sup> | NA <sup>d</sup> | 2 | 3.05 | 1.26  | 34.3    | 15.42  | 5.01  | NA <sup>d</sup> | -2.3            | 1               | 12.25           | NA <sup>d</sup> |
| Finland      | NA <sup>d</sup> | NA <sup>d</sup> | 4 | 2.86 | 26.55 | 102.51  | 6.54   | 0.74  | NA <sup>d</sup> | -1              | -1              | 0               | NA <sup>d</sup> |
| Greece       | NA <sup>d</sup> | NA <sup>d</sup> | 1 | 3.81 | 26.85 | 549.48  | 16.6   | 2.99  | NA <sup>d</sup> | -1.3            | 0               | NA <sup>d</sup> | NA <sup>d</sup> |
| Hungary      | NA <sup>d</sup> | NA <sup>d</sup> | 1 | 3.43 | 45.71 | 260.76  | 3.23   | 8.71  | NA <sup>d</sup> | 0               | 0               | 2.88            | NA <sup>d</sup> |
| India        | NA <sup>d</sup> | NA <sup>d</sup> | 3 | 3.43 | 7.62  | 652.9   | 47.01  | 1.33  | NA <sup>d</sup> | -9.8            | 2               | 13              | NA <sup>d</sup> |
| Indonesia    | NA <sup>d</sup> | NA <sup>d</sup> | 2 | 3.43 | 4.94  | 56.06   | 9.19   | 3.3   | 12.39           | NA <sup>d</sup> | 1               | 16.63           | NA <sup>d</sup> |
| Ireland      | NA <sup>d</sup> | NA <sup>d</sup> | 4 | 3.24 | 24.17 | 266.78  | 5.29   | 0.29  | NA <sup>d</sup> | 1.9             | NA <sup>d</sup> | NA <sup>d</sup> | NA <sup>d</sup> |
| Israel       | NA <sup>d</sup> | NA <sup>d</sup> | 4 | 3.62 | 61.16 | 11.48   | 0.12   | 4.93  | NA <sup>d</sup> | 1.2             | 1               | NA <sup>d</sup> | NA <sup>d</sup> |
| Netherlands  | NA <sup>d</sup> | NA <sup>d</sup> | 3 | 2.86 | 28.2  | 897.42  | 10.1   | 0.32  | NA <sup>d</sup> | -0.3            | 0               | 10.75           | NA <sup>d</sup> |
| New Zealand  | NA <sup>d</sup> | NA <sup>d</sup> | 4 | 2.86 | 6.75  | 1.26    | 2.33   | 0     | NA <sup>d</sup> | 0               | 1               | 7.5             | NA <sup>d</sup> |
| Norway       | NA <sup>d</sup> | NA <sup>d</sup> | 4 | 3.05 | 24.9  | 224.04  | 10.75  | 0.22  | NA <sup>d</sup> | 0.5             | 0               | NA <sup>d</sup> | NA <sup>d</sup> |
| Pakistan     | NA <sup>d</sup> | NA <sup>d</sup> | 2 | 3.43 | 1.39  | 44.05   | 11.79  | 2.97  | NA <sup>d</sup> | NA <sup>d</sup> | NA <sup>d</sup> | NA <sup>d</sup> | NA <sup>d</sup> |
| Peru         | NA <sup>d</sup> | NA <sup>d</sup> | 3 | 3.43 | 6.55  | 473.2   | 8.67   | 10.95 | NA <sup>d</sup> | -1.1            | 0               | 31.38           | NA <sup>d</sup> |
| Philippines  | NA <sup>d</sup> | NA <sup>d</sup> | 2 | 3.62 | 2.36  | 175.98  | 18.59  | 1.94  | 28.8            | -9              | NA <sup>d</sup> | 26.63           | 71.00           |
| Qatar        | NA <sup>d</sup> | NA <sup>d</sup> | 3 | 3.81 | 44.17 | 409.78  | 5.74   | 0.83  | NA <sup>d</sup> | NA <sup>d</sup> | 0               | 8.5             | NA <sup>d</sup> |
| Saudi Arabia | NA <sup>d</sup> | NA <sup>d</sup> | 4 | 3.81 | 20.41 | 95      | 7.92   | 1.22  | 8.5             | NA <sup>d</sup> | 1               | 8.75            | NA <sup>d</sup> |
| South Africa | NA <sup>d</sup> | NA <sup>d</sup> | 4 | 3.05 | 0.88  | 142.32  | 5.34   | 2.55  | NA <sup>d</sup> | NA <sup>d</sup> | 0               | 13.13           | NA <sup>d</sup> |
| Switzerland  | NA <sup>d</sup> | NA <sup>d</sup> | 1 | 3.43 | 28.88 | 401.7   | 5.27   | 0.51  | NA <sup>d</sup> | -0.3            | 0               | NA <sup>d</sup> | NA <sup>d</sup> |
| Thailand     | NA <sup>d</sup> | NA <sup>d</sup> | 4 | 2.86 | 2.63  | 135.59  | 145.26 | 0.87  | 19.6            | NA <sup>d</sup> | 3               | 9.38            | NA <sup>d</sup> |
| Turkey       | NA <sup>d</sup> | NA <sup>d</sup> | 3 | 3.43 | 17.29 | 508.44  | 8.9    | 1.72  | NA <sup>d</sup> | -0.4            | 1               | 6.38            | NA <sup>d</sup> |



|                      |                 |                 |   |      |       |        |      |      |                 |                 |   |      |                 |
|----------------------|-----------------|-----------------|---|------|-------|--------|------|------|-----------------|-----------------|---|------|-----------------|
| United Arab Emirates | NA <sup>d</sup> | NA <sup>d</sup> | 1 | 3.81 | 65.07 | 511.61 | 9.73 | 0.18 | NA <sup>d</sup> | NA <sup>d</sup> | 1 | 5.63 | NA <sup>d</sup> |
|----------------------|-----------------|-----------------|---|------|-------|--------|------|------|-----------------|-----------------|---|------|-----------------|

Notes:

- a. Google Trends include indicators as insomnia and health literacy.
- b. Increase in Google searches for “insomnia”.
- c. Google Trends number for “wash hands” and “face mask”.
- d. NA: not applicable. Indicates a country not ranked due to incomplete data.

**Supplementary Table S28. Complete ranking and raw scores of indicators in 50 countries and territories in June 2021**

| Country        | Rank            | Performance score (with Google Trends) <sup>a</sup> | Concern indicators  |                        |                            |                                                       |                           |                   |                 |                       |                       |                              | Performance score (without Google Trends) |                   |
|----------------|-----------------|-----------------------------------------------------|---------------------|------------------------|----------------------------|-------------------------------------------------------|---------------------------|-------------------|-----------------|-----------------------|-----------------------|------------------------------|-------------------------------------------|-------------------|
|                |                 |                                                     | Government policy   |                        |                            | Vital health and socioeconomic measures               |                           |                   |                 |                       |                       |                              |                                           | Hygiene education |
|                |                 |                                                     | Lockdown efficiency | Health-system policies | People covered by vaccines | One-month cases per 100,000 members of the population | Infection growth rate (%) | Fatality rate (%) | GDP loss (%)    | Unemployment rate (%) | Insomnia <sup>b</sup> | Health literacy <sup>c</sup> |                                           |                   |
| Singapore      | 1               | 66.54                                               | 2                   | 4                      | 45.86                      | 9.03                                                  | 0.85                      | 0.57              | 28              | -0.1                  | 1                     | 16.6                         | 71.81                                     |                   |
| Czech Republic | 2               | 66.21                                               | 4                   | 3.43                   | 38.65                      | 56.17                                                 | 0.36                      | 3.24              | 18.6            | 0                     | -1                    | 8.8                          | 69.64                                     |                   |
| Spain          | 3               | 65.69                                               | 1                   | 3.24                   | 44.94                      | 279.27                                                | 3.55                      | 0.71              | 41.4            | -0.07                 | -1                    | 12                           | 68.00                                     |                   |
| France         | 4               | 65.34                                               | 1                   | 3.81                   | 40.52                      | 160.55                                                | 1.89                      | 1.43              | 37.1            | 0.9                   | -2                    | 7.1                          | 66.99                                     |                   |
| Austria        | 5               | 64.95                                               | 2                   | 3.43                   | 43.36                      | 62.14                                                 | 0.87                      | 1.77              | 25              | -3.1                  | 0                     | 5.7                          | 71.10                                     |                   |
| United Kingdom | 6               | 64.40                                               | 1                   | 3.43                   | 57.38                      | 462.64                                                | 6.97                      | 0.11              | 43.6            | 0.6                   | 0                     | 9.5                          | 69.24                                     |                   |
| Italy          | 7               | 64.31                                               | 2                   | 3.81                   | 42.99                      | 69.61                                                 | 1                         | 3.42              | 35.5            | 0.4                   | 1                     | 13.7                         | 69.92                                     |                   |
| Portugal       | 8               | 64.09                                               | 3                   | 3.62                   | 41.77                      | 298.76                                                | 3.59                      | 0.23              | 31.9            | 1                     | 0                     | 3.4                          | 70.73                                     |                   |
| United States  | 9               | 63.82                                               | 1                   | 3.62                   | 49.32                      | 120.05                                                | 1.19                      | 2.6               | 21.2            | -5.2                  | 1                     | 11.9                         | 69.86                                     |                   |
| South Korea    | 10              | 61.93                                               | 4                   | 3.43                   | 18.81                      | 33.01                                                 | 12.02                     | 0.34              | 8.5             | -0.5                  | 0                     | 13.4                         | 64.96                                     |                   |
| Sweden         | 11              | 61.12                                               | 3                   | 2.86                   | 39.85                      | 213.06                                                | 2.01                      | 0.83              | 17.7            | 0.5                   | 0                     | 11.7                         | 64.46                                     |                   |
| Mexico         | 12              | 60.97                                               | 4                   | 3.24                   | 17.8                       | 81.85                                                 | 4.37                      | 8.98              | 38.4            | -1.5                  | 2                     | 10                           | 68.97                                     |                   |
| Germany        | 13              | 60.44                                               | 2                   | 3.62                   | 44.98                      | 55.24                                                 | 1.25                      | 5.06              | 20.5            | -0.2                  | 0                     | 9                            | 64.45                                     |                   |
| Japan          | 14              | 60.18                                               | 4                   | 2.48                   | 20.15                      | 42                                                    | 7.11                      | 3.25              | 17.6            | 0.1                   | 0                     | 13.9                         | 62.62                                     |                   |
| Russia         | 15              | 58.66                                               | 1                   | 3.81                   | 13.71                      | 298.82                                                | 8.7                       | 3.1               | 18.1            | -1.4                  | 0                     | 28                           | 56.37                                     |                   |
| Poland         | 16              | 58.31                                               | 4                   | 3.24                   | 38.63                      | 20.16                                                 | 0.27                      | 16.73             | 19.2            | -0.2                  | 0                     | 15.8                         | 59.69                                     |                   |
| Malaysia       | 17              | 57.87                                               | 3                   | 3.43                   | 12.71                      | 554.97                                                | 31.38                     | 1.32              | 33.3            | -0.1                  | 1                     | 14.2                         | 61.71                                     |                   |
| Hong Kong      | 18              | 56.08                                               | 2                   | 3.62                   | 24.87                      | 1.09                                                  | 0.69                      | 1.22              | 16.5            | -0.7                  | 2                     | 6.9                          | 63.80                                     |                   |
| Taiwan         | 19              | 45.69                                               | 2                   | 3.43                   | 4.29                       | 26.42                                                 | 73.94                     | 8.33              | 7.08            | 0.79                  | 1                     | 27.7                         | 42.33                                     |                   |
| Vietnam        | 20              | 41.15                                               | 2                   | 3.24                   | 1.94                       | 9.88                                                  | 129.44                    | 0.35              | 6.22            | -0.11                 | 1                     | 7.4                          | 42.91                                     |                   |
| Argentina      | NA <sup>d</sup> | NA <sup>d</sup>                                     | 3                   | 3.24                   | 22.73                      | 1523.57                                               | 18.21                     | 2.35              | NA <sup>d</sup> | NA <sup>d</sup>       | 0                     | 6.6                          | NA <sup>d</sup>                           |                   |
| Australia      | NA <sup>d</sup> | NA <sup>d</sup>                                     | 2                   | 3.43                   | 14.99                      | 2.06                                                  | 1.74                      | 0                 | NA <sup>d</sup> | -2.5                  | -1                    | 10.7                         | NA <sup>d</sup>                           |                   |

|              |                 |                 |   |      |       |         |       |      |                 |                 |                 |                 |                 |
|--------------|-----------------|-----------------|---|------|-------|---------|-------|------|-----------------|-----------------|-----------------|-----------------|-----------------|
| Belgium      | NA <sup>d</sup> | NA <sup>d</sup> | 1 | 3.62 | 47.53 | 199.58  | 2.18  | 0.94 | 28.5            | 0.8             | NA <sup>d</sup> | NA <sup>d</sup> | 64.95           |
| Brazil       | NA <sup>d</sup> | NA <sup>d</sup> | 3 | 3.62 | 23.25 | 946.36  | 12.16 | 2.75 | NA <sup>d</sup> | NA <sup>d</sup> | 4               | 24.3            | NA <sup>d</sup> |
| Canada       | NA <sup>d</sup> | NA <sup>d</sup> | 2 | 3.62 | 49.53 | 88.38   | 2.4   | 2.23 | NA <sup>d</sup> | -4.5            | -1              | 14.2            | NA <sup>d</sup> |
| Chile        | NA <sup>d</sup> | NA <sup>d</sup> | 3 | 3.62 | 60.36 | 897.44  | 12.39 | 1.89 | NA <sup>d</sup> | -2.7            | 1               | 9.9             | NA <sup>d</sup> |
| China        | NA <sup>d</sup> | NA <sup>d</sup> | 4 | 3.62 | 43.24 | 0.05    | 0.74  | 0    | 4.7             | -0.7            | NA <sup>d</sup> | NA <sup>d</sup> | 70.21           |
| Colombia     | NA <sup>d</sup> | NA <sup>d</sup> | 3 | 3.24 | 17.96 | 1640.09 | 24.5  | 2.13 | NA <sup>d</sup> | -5.4            | 2               | 10.4            | NA <sup>d</sup> |
| Denmark      | NA <sup>d</sup> | NA <sup>d</sup> | 1 | 3.24 | 45.44 | 216.12  | 4.44  | 0.14 | NA <sup>d</sup> | -1.7            | 0               | 7.9             | NA <sup>d</sup> |
| Egypt        | NA <sup>d</sup> | NA <sup>d</sup> | 4 | 3.05 | 2.09  | 18.21   | 7.09  | 5.76 | NA <sup>d</sup> | -2.3            | 0               | 25.5            | NA <sup>d</sup> |
| Finland      | NA <sup>d</sup> | NA <sup>d</sup> | 4 | 3.05 | 39.01 | 58.73   | 3.52  | 0.4  | NA <sup>d</sup> | -0.3            | 1               | 0               | NA <sup>d</sup> |
| Greece       | NA <sup>d</sup> | NA <sup>d</sup> | 1 | 3.81 | 40.25 | 193.32  | 5.01  | 2.94 | NA <sup>d</sup> | NA <sup>d</sup> | 0               | NA <sup>d</sup> | NA <sup>d</sup> |
| Hungary      | NA <sup>d</sup> | NA <sup>d</sup> | 4 | 3.24 | 52.56 | 37.16   | 0.45  | 7.21 | NA <sup>d</sup> | -0.5            | 0               | 1.9             | NA <sup>d</sup> |
| India        | NA <sup>d</sup> | NA <sup>d</sup> | 3 | 3.43 | 11.93 | 162.07  | 7.94  | 3.02 | NA <sup>d</sup> | -1              | 0               | 12.8            | NA <sup>d</sup> |
| Indonesia    | NA <sup>d</sup> | NA <sup>d</sup> | 2 | 3.43 | 7.81  | 130.36  | 19.57 | 2.22 | 12.39           | NA <sup>d</sup> | 1               | 19              | NA <sup>d</sup> |
| Ireland      | NA <sup>d</sup> | NA <sup>d</sup> | 1 | 3.24 | 40.56 | 199.79  | 3.76  | 0.58 | NA <sup>d</sup> | 1               | NA <sup>d</sup> | NA <sup>d</sup> | NA <sup>d</sup> |
| Israel       | NA <sup>d</sup> | NA <sup>d</sup> | 4 | 3.43 | 62.22 | 26.6    | 0.27  | 0.74 | NA <sup>d</sup> | 0.6             | 0               | NA <sup>d</sup> | NA <sup>d</sup> |
| Netherlands  | NA <sup>d</sup> | NA <sup>d</sup> | 3 | 3.05 | 45    | 210.12  | 2.15  | 0.36 | NA <sup>d</sup> | -1.1            | 0               | 11.1            | NA <sup>d</sup> |
| New Zealand  | NA <sup>d</sup> | NA <sup>d</sup> | 4 | 2.86 | 12.18 | 1.43    | 2.58  | 0    | NA <sup>d</sup> | 0               | 0               | 6.8             | NA <sup>d</sup> |
| Norway       | NA <sup>d</sup> | NA <sup>d</sup> | 4 | 3.24 | 39.01 | 114.36  | 4.96  | 0.18 | NA <sup>d</sup> | 0.5             | 0               | NA <sup>d</sup> | NA <sup>d</sup> |
| Pakistan     | NA <sup>d</sup> | NA <sup>d</sup> | 2 | 3.43 | 3.05  | 16.11   | 3.86  | 4.13 | NA <sup>d</sup> | NA <sup>d</sup> | NA <sup>d</sup> | NA <sup>d</sup> | NA <sup>d</sup> |
| Peru         | NA <sup>d</sup> | NA <sup>d</sup> | 3 | 3.43 | 11.68 | 292.97  | 4.94  | 8.85 | NA <sup>d</sup> | -6              | 0               | 21.4            | NA <sup>d</sup> |
| Philippines  | NA <sup>d</sup> | NA <sup>d</sup> | 3 | 3.43 | 4.77  | 166.32  | 14.81 | 2.03 | 28.8            | -9              | NA <sup>d</sup> | 40.6            | 74.11           |
| Qatar        | NA <sup>d</sup> | NA <sup>d</sup> | 3 | 3.62 | 54.58 | 160.11  | 2.12  | 0.74 | NA <sup>d</sup> | NA <sup>d</sup> | 0               | 4.8             | NA <sup>d</sup> |
| Saudi Arabia | NA <sup>d</sup> | NA <sup>d</sup> | 4 | 3.81 | 25.68 | 106.73  | 8.25  | 1.23 | 8.5             | NA <sup>d</sup> | 0               | 10.4            | NA <sup>d</sup> |
| South Africa | NA <sup>d</sup> | NA <sup>d</sup> | 3 | 3.43 | 2.55  | 519.92  | 18.51 | 1.34 | NA <sup>d</sup> | NA <sup>d</sup> | 0               | 12.5            | NA <sup>d</sup> |
| Switzerland  | NA <sup>d</sup> | NA <sup>d</sup> | 1 | 3.24 | 43.51 | 95.49   | 1.19  | 0.98 | NA <sup>d</sup> | -0.4            | 1               | NA <sup>d</sup> | NA <sup>d</sup> |
| Thailand     | NA <sup>d</sup> | NA <sup>d</sup> | 4 | 2.86 | 7.11  | 142.56  | 62.27 | 1    | 19.6            | NA <sup>d</sup> | 0               | 7.3             | NA <sup>d</sup> |
| Turkey       | NA <sup>d</sup> | NA <sup>d</sup> | 3 | 3.43 | 30    | 208.98  | 3.36  | 1.25 | NA <sup>d</sup> | -2.7            | 0               | 7               | NA <sup>d</sup> |

|                      |                 |                 |   |      |       |        |       |      |                 |                 |   |      |                 |
|----------------------|-----------------|-----------------|---|------|-------|--------|-------|------|-----------------|-----------------|---|------|-----------------|
| United Arab Emirates | NA <sup>d</sup> | NA <sup>d</sup> | 1 | 3.81 | 77.66 | 627.59 | 10.87 | 0.21 | NA <sup>d</sup> | NA <sup>d</sup> | 0 | 14.3 | NA <sup>d</sup> |
|----------------------|-----------------|-----------------|---|------|-------|--------|-------|------|-----------------|-----------------|---|------|-----------------|

Notes:

- a. Google Trends include indicators as insomnia and health literacy
- b. Increase in Google searches for “insomnia”.
- c. Google Trends number for “wash hands” and “face mask”.
- d. NA: not applicable. Indicates a country not ranked due to incomplete data.

**Supplementary Table S29. Complete ranking and raw scores of indicators in 50 countries and territories in July 2021**

| Country        | Rank | Performance score (with Google Trends) <sup>a</sup> | Concern indicators  |                        |                            |                                                       |                           |                   |              |                       |                       |                              | Performance score (without Google Trends) |                   |
|----------------|------|-----------------------------------------------------|---------------------|------------------------|----------------------------|-------------------------------------------------------|---------------------------|-------------------|--------------|-----------------------|-----------------------|------------------------------|-------------------------------------------|-------------------|
|                |      |                                                     | Government policy   |                        |                            | Vital health and socioeconomic measures               |                           |                   |              |                       |                       |                              |                                           | Hygiene education |
|                |      |                                                     | Lockdown efficiency | Health-system policies | People covered by vaccines | One-month cases per 100,000 members of the population | Infection growth rate (%) | Fatality rate (%) | GDP loss (%) | Unemployment rate (%) | Insomnia <sup>b</sup> | Health literacy <sup>c</sup> |                                           |                   |
| Singapore      | 1    | 77.26                                               | 2                   | 4.00                   | 69.46                      | 44.04                                                 | 3.84                      | 0.04              | 12.9         | -1                    | 0                     | 15.5                         | 79.54                                     |                   |
| Canada         | 2    | 75.15                                               | 2                   | 3.43                   | 64.98                      | 40.16                                                 | 1.07                      | 1.98              | 9.1          | -3.4                  | 0                     | 15.375                       | 76.96                                     |                   |
| Chile          | 3    | 75.12                                               | 3                   | 3.62                   | 67.39                      | 311.62                                                | 3.85                      | 4.85              | 26.2         | -4.17                 | 1                     | 7.25                         | 83.58                                     |                   |
| Peru           | 4    | 73.93                                               | 3                   | 3.62                   | 20.39                      | 177.84                                                | 2.89                      | 6.78              | 20.4         | -7                    | 0                     | 12.5                         | 77.06                                     |                   |
| Japan          | 5    | 72.64                                               | 4                   | 2.86                   | 35.34                      | 100.77                                                | 15.89                     | 0.32              | 7            | -0.1                  | 0                     | 16.875                       | 72.98                                     |                   |
| Hungary        | 6    | 72.27                                               | 4                   | 3.43                   | 57.33                      | 14.15                                                 | 0.17                      | 2.49              | 10.7         | -0.9                  | 0                     | 4.25                         | 79.62                                     |                   |
| Italy          | 7    | 72.17                                               | 2                   | 3.62                   | 57.03                      | 149.28                                                | 2.12                      | 0.55              | 9.1          | -0.7                  | 0                     | 14.875                       | 73.52                                     |                   |
| Austria        | 8    | 72.01                                               | 4                   | 3.62                   | 54.23                      | 95.59                                                 | 1.33                      | 0.40              | 9.5          | -2.5                  | 1                     | 3                            | 82.07                                     |                   |
| Saudi Arabia   | 9    | 71.51                                               | 2                   | 3.81                   | 38.01                      | 107.92                                                | 7.82                      | 1.10              | 11.6         | -1.9                  | 0                     | 13.875                       | 73.26                                     |                   |
| Sweden         | 10   | 70.64                                               | 4                   | 2.86                   | 51.00                      | 98.92                                                 | 0.92                      | 0.26              | 7.2          | -0.9                  | 0                     | 5.875                        | 76.66                                     |                   |
| South Korea    | 11   | 70.57                                               | 4                   | 3.43                   | 25.02                      | 81.99                                                 | 26.67                     | 0.18              | 5            | -0.8                  | 0                     | 11.625                       | 73.34                                     |                   |
| New Zealand    | 12   | 70.37                                               | 4                   | 3.05                   | 18.79                      | 2.56                                                  | 4.78                      | 0.00              | -0.7         | -1.9                  | -2                    | 7                            | 71.52                                     |                   |
| Australia      | 13   | 70.28                                               | 2                   | 3.43                   | 23.91                      | 14.50                                                 | 12.21                     | 0.37              | 7.7          | -2.9                  | 0                     | 15.375                       | 70.88                                     |                   |
| Colombia       | 14   | 69.75                                               | 3                   | 3.24                   | 26.84                      | 1061.79                                               | 12.84                     | 2.60              | 21.7         | -5.9                  | 1                     | 15.75                        | 72.09                                     |                   |
| Poland         | 15   | 69.15                                               | 4                   | 3.24                   | 45.55                      | 8.01                                                  | 0.11                      | 7.93              | 7            | -0.3                  | 0                     | 12.625                       | 71.01                                     |                   |
| Czech Republic | 16   | 69.00                                               | 4                   | 3.62                   | 48.51                      | 58.64                                                 | 0.38                      | 1.11              | 8            | -0.1                  | 0                     | 0.375                        | 77.71                                     |                   |
| Netherlands    | 17   | 68.11                                               | 1                   | 3.24                   | 60.50                      | 1052.01                                               | 10.71                     | 0.05              | 7.8          | -1.4                  | -1                    | 20.75                        | 63.06                                     |                   |
| Germany        | 18   | 66.95                                               | 2                   | 3.62                   | 55.40                      | 48.29                                                 | 1.08                      | 1.78              | 6.3          | 1.6                   | -1                    | 6.625                        | 69.55                                     |                   |
| United States  | 19   | 66.71                                               | 1                   | 3.62                   | 53.12                      | 396.53                                                | 3.91                      | 0.66              | 7.8          | -4.8                  | 2                     | 13.125                       | 71.85                                     |                   |
| Hong Kong      | 20   | 66.13                                               | 2                   | 3.62                   | 37.49                      | 0.81                                                  | 0.51                      | 1.64              | 9            | -1.1                  | 0                     | 5.375                        | 71.31                                     |                   |
| India          | 21   | 65.66                                               | 2                   | 3.43                   | 16.56                      | 89.29                                                 | 4.09                      | 2.00              | 15.8         | -0.4                  | 1                     | 13.75                        | 68.10                                     |                   |
| Argentina      | 22   | 65.57                                               | 3                   | 3.24                   | 34.95                      | 1007.31                                               | 10.28                     | 2.49              | 22           | -3.5                  | 0                     | 4.125                        | 71.31                                     |                   |
| Portugal       | 23   | 65.31                                               | 3                   | 3.43                   | 60.10                      | 876.03                                                | 10.13                     | 0.30              | 9.9          | -1.9                  | 0                     | 1.625                        | 72.39                                     |                   |

|                |                 |                 |   |      |       |         |        |       |                 |                 |                 |                 |                 |
|----------------|-----------------|-----------------|---|------|-------|---------|--------|-------|-----------------|-----------------|-----------------|-----------------|-----------------|
| Mexico         | 24              | 64.71           | 3 | 3.24 | 25.61 | 252.55  | 13.06  | 2.39  | 13.2            | -1              | 1               | 8.25            | 70.00           |
| France         | 25              | 64.06           | 1 | 3.62 | 55.24 | 522.34  | 6.05   | 0.23  | 6.8             | -1              | 0               | 8.75            | 66.83           |
| Spain          | 26              | 63.74           | 1 | 3.05 | 60.10 | 1365.03 | 16.75  | 0.10  | 12              | -1.69           | 0               | 17.375          | 61.58           |
| Russia         | 27              | 61.88           | 1 | 3.43 | 21.21 | 504.18  | 13.50  | 3.12  | 7.8             | -1.8            | 0               | 16              | 60.03           |
| Denmark        | 28              | 61.19           | 1 | 3.43 | 63.25 | 397.88  | 7.88   | 0.06  | 5.8             | -1.5            | 1               | 2.625           | 68.76           |
| Finland        | 29              | 61.08           | 1 | 3.24 | 48.66 | 199.34  | 11.55  | 0.14  | 6.8             | -0.6            | 0               | 2.25            | 66.76           |
| United Kingdom | 30              | 60.54           | 1 | 3.62 | 62.41 | 1554.75 | 22.07  | 0.14  | 15.3            | 0.3             | 0               | 11.25           | 61.02           |
| Thailand       | 31              | 59.69           | 3 | 2.86 | 12.64 | 483.18  | 130.35 | 0.84  | 6.1             | 0.35            | 0               | 10.75           | 60.23           |
| Malaysia       | 32              | 58.91           | 3 | 3.43 | 32.20 | 1102.30 | 48.05  | 1.07  | -1.8            | 0.1             | 0               | 11.875          | 58.63           |
| Turkey         | 33              | 58.67           | 1 | 3.43 | 43.08 | 354.40  | 5.55   | 0.53  | 1.1             | -2.3            | 1               | 3.875           | 64.90           |
| Brazil         | 34              | 57.40           | 3 | 3.62 | 33.25 | 631.72  | 7.28   | 2.82  | 7.9             | -0.1            | 3               | 6.25            | 66.15           |
| Taiwan         | 35              | 55.45           | 2 | 3.43 | 16.95 | 3.65    | 5.88   | 15.98 | -0.56           | 0.46            | 1               | 21.375          | 51.05           |
| South Africa   | 36              | 54.86           | 3 | 3.24 | 6.08  | 788.58  | 23.99  | 2.40  | 9.1             | 4.1             | 1               | 12.5            | 55.30           |
| Vietnam        | 37              | 37.86           | 2 | 3.24 | 3.16  | 135.49  | 780.01 | 0.92  | -8.64           | 1.22            | 4               | 7.875           | 42.90           |
| Belgium        | NA <sup>d</sup> | NA <sup>d</sup> | 1 | 3.81 | 63.12 | 340.29  | 3.65   | 0.17  | 9.2             | 0.2             | NA <sup>d</sup> | NA <sup>d</sup> | 69.69           |
| China          | NA <sup>d</sup> | NA <sup>d</sup> | 4 | 3.62 | 57.22 | 0.08    | 1.32   | 0.00  | 0               | -0.6            | NA <sup>d</sup> | NA <sup>d</sup> | 78.07           |
| Egypt          | NA <sup>d</sup> | NA <sup>d</sup> | 4 | 3.05 | 2.56  | 2.86    | 1.06   | 11.91 | NA <sup>d</sup> | 0.2             | 0               | 0               | NA <sup>d</sup> |
| Greece         | NA <sup>d</sup> | NA <sup>d</sup> | 3 | 3.62 | 50.80 | 683.15  | 16.77  | 0.37  | 23.4            | -2.5            | 0               | NA <sup>d</sup> | 78.47           |
| Indonesia      | NA <sup>d</sup> | NA <sup>d</sup> | 3 | 3.43 | 12.26 | 445.57  | 56.53  | 2.89  | 7               | NA <sup>d</sup> | 4               | 22.25           | NA <sup>d</sup> |
| Ireland        | NA <sup>d</sup> | NA <sup>d</sup> | 1 | 3.43 | 59.90 | 583.35  | 10.69  | 0.13  | 3.3             | -0.1            | NA <sup>d</sup> | NA <sup>d</sup> | 64.19           |
| Israel         | NA <sup>d</sup> | NA <sup>d</sup> | 1 | 3.43 | 60.39 | 347.01  | 3.83   | 0.14  | 7.27            | 0.2             | 0               | NA <sup>d</sup> | 67.35           |
| Norway         | NA <sup>d</sup> | NA <sup>d</sup> | 4 | 3.24 | 49.85 | 115.47  | 4.81   | 0.08  | 5.3             | -1.2            | 0               | NA <sup>d</sup> | 77.28           |
| Pakistan       | NA <sup>d</sup> | NA <sup>d</sup> | 2 | 3.43 | 6.58  | 33.94   | 7.97   | 1.44  | NA <sup>d</sup> | NA <sup>d</sup> | NA <sup>d</sup> | NA <sup>d</sup> | NA <sup>d</sup> |
| Philippines    | NA <sup>d</sup> | NA <sup>d</sup> | 2 | 3.43 | 8.72  | 158.86  | 12.49  | 1.83  | 18.7            | -3.1            | NA <sup>d</sup> | 17.875          | 70.42           |
| Qatar          | NA <sup>d</sup> | NA <sup>d</sup> | 4 | 3.81 | 64.50 | 142.23  | 1.88   | 0.26  | NA <sup>d</sup> | NA <sup>d</sup> | 0               | 0               | NA <sup>d</sup> |
| Switzerland    | NA <sup>d</sup> | NA <sup>d</sup> | 4 | 3.43 | 51.87 | 168.22  | 2.09   | 0.14  | 5.4             | -0.4            | 0               | NA <sup>d</sup> | 76.89           |
| United Arab    | NA <sup>d</sup> | NA <sup>d</sup> | 3 | 3.81 | 84.05 | 479.94  | 7.58   | 0.29  | NA <sup>d</sup> | NA <sup>d</sup> | 0               | 0               | NA <sup>d</sup> |

## Emirates

---

### Notes:

- a. Google Trends include indicators as insomnia and health literacy
- b. Increase in Google searches for “insomnia”.
- c. Google Trends number for “wash hands” and “face mask”.
- d. NA: not applicable. Indicates a country not ranked due to incomplete data.

**Supplementary Table S30. Complete ranking and raw scores of indicators in 50 countries and territories in August 2021**

| Country        | Rank | Performance score (with Google Trends) <sup>a</sup> | Concern indicators  |                        |                            |                                                       |                           |                   |              |                       |                       |                              | Performance score (without Google Trends) |                   |
|----------------|------|-----------------------------------------------------|---------------------|------------------------|----------------------------|-------------------------------------------------------|---------------------------|-------------------|--------------|-----------------------|-----------------------|------------------------------|-------------------------------------------|-------------------|
|                |      |                                                     | Government policy   |                        |                            | Vital health and socioeconomic measures               |                           |                   |              |                       |                       |                              |                                           | Hygiene education |
|                |      |                                                     | Lockdown efficiency | Health-system policies | People covered by vaccines | One-month cases per 100,000 members of the population | Infection growth rate (%) | Fatality rate (%) | GDP loss (%) | Unemployment rate (%) | Insomnia <sup>b</sup> | Health literacy <sup>c</sup> |                                           |                   |
| Singapore      | 1    | 86.01                                               | 4                   | 4.00                   | 81.51                      | 48.39                                                 | 4.06                      | 0.68              | 12.9         | -1                    | 0                     | 18.875                       | 86.53                                     |                   |
| Canada         | 2    | 82.15                                               | 4                   | 3.43                   | 70.30                      | 180.30                                                | 4.77                      | 0.57              | 9.1          | -3.1                  | 0                     | 15.625                       | 83.60                                     |                   |
| Peru           | 3    | 77.76                                               | 2                   | 3.62                   | 28.78                      | 114.50                                                | 1.81                      | 5.00              | 20.4         | -6.1                  | -1                    | 14                           | 76.56                                     |                   |
| Saudi Arabia   | 4    | 77.40                                               | 2                   | 3.43                   | 52.54                      | 49.77                                                 | 3.35                      | 1.56              | 11.6         | -1.9                  | 0                     | 21.5                         | 74.25                                     |                   |
| Chile          | 5    | 76.73                                               | 2                   | 3.62                   | 75.62                      | 119.21                                                | 1.42                      | 6.50              | 26.2         | -4.35                 | 0                     | 6.75                         | 81.99                                     |                   |
| Colombia       | 6    | 75.66                                               | 4                   | 3.62                   | 34.67                      | 241.42                                                | 2.59                      | 3.41              | 21.7         | -4.5                  | 2                     | 11.875                       | 82.68                                     |                   |
| Czech Republic | 7    | 74.11                                               | 4                   | 3.62                   | 53.69                      | 52.34                                                 | 0.34                      | 0.55              | 8            | -0.2                  | -1                    | 2.125                        | 78.90                                     |                   |
| Argentina      | 8    | 74.09                                               | 3                   | 3.43                   | 46.33                      | 561.02                                                | 5.19                      | 2.38              | 22           | -3.5                  | -1                    | 3.125                        | 78.30                                     |                   |
| Italy          | 9    | 74.07                                               | 3                   | 3.62                   | 64.65                      | 314.68                                                | 4.37                      | 0.61              | 9.1          | -0.6                  | 1                     | 15                           | 76.37                                     |                   |
| Poland         | 10   | 72.77                                               | 4                   | 3.24                   | 48.00                      | 15.16                                                 | 0.20                      | 1.47              | 7            | -0.3                  | 1                     | 12.625                       | 76.12                                     |                   |
| Hungary        | 11   | 72.43                                               | 4                   | 3.43                   | 60.22                      | 29.54                                                 | 0.35                      | 1.12              | 10.7         | -0.5                  | 0                     | 0.5                          | 80.24                                     |                   |
| South Korea    | 12   | 71.24                                               | 4                   | 3.81                   | 42.95                      | 104.59                                                | 26.86                     | 0.36              | 5            | -0.5                  | 0                     | 6.125                        | 75.49                                     |                   |
| Australia      | 13   | 71.05                                               | 2                   | 3.43                   | 38.12                      | 80.31                                                 | 60.23                     | 0.42              | 7.7          | -2.3                  | -1                    | 13.25                        | 68.61                                     |                   |
| Sweden         | 14   | 70.09                                               | 4                   | 2.67                   | 62.18                      | 263.51                                                | 2.43                      | 0.14              | 7.2          | -0.3                  | 2                     | 11.5                         | 75.93                                     |                   |
| Portugal       | 15   | 70.07                                               | 3                   | 3.62                   | 72.71                      | 681.52                                                | 7.15                      | 0.55              | 9.9          | -1.9                  | 0                     | 0.875                        | 77.08                                     |                   |
| Netherlands    | 16   | 69.88                                               | 1                   | 3.62                   | 66.67                      | 445.42                                                | 4.09                      | 0.26              | 7.8          | -1.4                  | 0                     | 11.875                       | 70.44                                     |                   |
| Austria        | 17   | 69.30                                               | 2                   | 3.62                   | 58.35                      | 323.44                                                | 4.44                      | 0.12              | 9.5          | -2.1                  | 0                     | 3.375                        | 74.67                                     |                   |
| New Zealand    | 18   | 69.24                                               | 2                   | 3.24                   | 34.32                      | 13.59                                                 | 24.23                     | 0.00              | -0.7         | -1.9                  | 0                     | 16.625                       | 66.89                                     |                   |
| Japan          | 19   | 69.07                                               | 3                   | 2.67                   | 51.92                      | 450.43                                                | 61.27                     | 0.15              | 7            | -0.2                  | 0                     | 17                           | 66.45                                     |                   |
| France         | 20   | 69.03                                               | 3                   | 3.62                   | 65.56                      | 925.91                                                | 10.12                     | 0.41              | 6.8          | -1                    | 0                     | 6.875                        | 72.29                                     |                   |
| Hong Kong      | 21   | 67.86                                               | 2                   | 3.62                   | 50.24                      | 1.69                                                  | 1.07                      | 0.00              | 9            | -1.4                  | 1                     | 4.5                          | 74.71                                     |                   |
| Germany        | 22   | 67.62                                               | 2                   | 3.62                   | 60.94                      | 225.22                                                | 5.00                      | 0.30              | 6.3          | 1.4                   | 0                     | 7.75                         | 70.01                                     |                   |



|                |                 |                 |   |      |       |         |        |       |                 |                 |                 |                 |                 |
|----------------|-----------------|-----------------|---|------|-------|---------|--------|-------|-----------------|-----------------|-----------------|-----------------|-----------------|
| Spain          | 23              | 66.90           | 1 | 3.43 | 70.73 | 872.86  | 9.18   | 0.70  | 12              | -1.69           | 0               | 7.875           | 69.04           |
| Russia         | 24              | 66.16           | 1 | 3.81 | 27.50 | 435.50  | 10.27  | 3.79  | 7.8             | -2              | -1              | 12.625          | 62.86           |
| Denmark        | 25              | 65.90           | 1 | 3.81 | 73.75 | 496.89  | 9.12   | 0.12  | 5.8             | -1.4            | 0               | 2.625           | 70.84           |
| Mexico         | 26              | 64.25           | 3 | 3.43 | 32.61 | 387.03  | 17.70  | 3.65  | 13.2            | -0.9            | 2               | 10.5            | 69.21           |
| United Kingdom | 27              | 64.14           | 1 | 3.62 | 66.71 | 1370.01 | 15.93  | 0.31  | 15.3            | 0               | 0               | 8.75            | 65.09           |
| Brazil         | 28              | 63.99           | 1 | 3.05 | 45.37 | 403.31  | 4.33   | 2.79  | 7.9             | -1.3            | 1               | 15.25           | 63.62           |
| India          | 29              | 63.47           | 2 | 3.43 | 23.14 | 82.89   | 3.65   | 1.27  | 15.8            | -0.1            | 0               | 0               | 69.34           |
| Finland        | 30              | 61.98           | 1 | 3.24 | 61.30 | 367.32  | 19.08  | 0.22  | 6.8             | -1.2            | 0               | 0               | 67.48           |
| Turkey         | 31              | 61.44           | 1 | 3.24 | 55.36 | 777.56  | 11.55  | 0.81  | 1.1             | -0.9            | -1              | 4.5             | 61.69           |
| United States  | 32              | 60.74           | 1 | 3.62 | 56.73 | 1288.11 | 12.23  | 0.65  | 7.8             | -3.2            | 4               | 18.25           | 65.31           |
| South Africa   | 33              | 59.38           | 1 | 3.62 | 10.47 | 549.96  | 13.49  | 3.10  | 9.1             | 4.1             | -1              | 15.875          | 52.49           |
| Taiwan         | 34              | 59.11           | 2 | 3.24 | 22.97 | 1.35    | 2.05   | 14.95 | -0.56           | 0.25            | -1              | 16.875          | 51.58           |
| Thailand       | 35              | 56.07           | 3 | 3.43 | 22.71 | 868.38  | 101.70 | 1.11  | 6.1             | 0.35            | 1               | 8.125           | 57.87           |
| Malaysia       | 36              | 54.72           | 3 | 3.43 | 54.21 | 1931.22 | 56.86  | 1.21  | -1.8            | -0.1            | 1               | 7.875           | 56.32           |
| Vietnam        | 37              | 36.67           | 2 | 3.43 | 10.29 | 317.86  | 207.94 | 3.13  | -8.64           | 1.22            | 4               | 6.875           | 41.84           |
| Belgium        | NA <sup>d</sup> | NA <sup>d</sup> | 1 | 3.81 | 69.99 | 515.37  | 5.33   | 0.23  | 9.2             | 0               | NA <sup>d</sup> | NA <sup>d</sup> | 69.83           |
| China          | NA <sup>d</sup> | NA <sup>d</sup> | 2 | 3.62 | 71.58 | 0.13    | 2.03   | 0.00  | 0               | -0.5            | NA <sup>d</sup> | NA <sup>d</sup> | 73.40           |
| Egypt          | NA <sup>d</sup> | NA <sup>d</sup> | 4 | 3.05 | 4.19  | 4.01    | 1.47   | 5.07  | NA <sup>d</sup> | 0.2             | 0               | 14.375          | NA <sup>d</sup> |
| Greece         | NA <sup>d</sup> | NA <sup>d</sup> | 3 | 3.62 | 55.00 | 912.76  | 19.19  | 0.77  | 23.4            | -3.3            | 1               | NA <sup>d</sup> | 78.78           |
| Indonesia      | NA <sup>d</sup> | NA <sup>d</sup> | 3 | 3.62 | 17.91 | 246.11  | 19.95  | 5.72  | 7               | NA <sup>d</sup> | 2               | 18.25           | NA <sup>d</sup> |
| Ireland        | NA <sup>d</sup> | NA <sup>d</sup> | 1 | 3.62 | 69.19 | 1032.95 | 17.10  | 0.11  | 3.3             | -1.6            | NA <sup>d</sup> | NA <sup>d</sup> | 65.23           |
| Israel         | NA <sup>d</sup> | NA <sup>d</sup> | 3 | 3.43 | 74.26 | 2070.11 | 22.01  | 0.30  | 7.27            | 0.1             | 0               | NA <sup>d</sup> | 64.24           |
| Norway         | NA <sup>d</sup> | NA <sup>d</sup> | 4 | 3.43 | 63.94 | 412.52  | 16.38  | 0.07  | 5.3             | -1.2            | 0               | NA <sup>d</sup> | 77.31           |
| Pakistan       | NA <sup>d</sup> | NA <sup>d</sup> | 2 | 3.62 | 12.60 | 57.22   | 12.45  | 1.91  | NA <sup>d</sup> | NA <sup>d</sup> | NA <sup>d</sup> | NA <sup>d</sup> | NA <sup>d</sup> |
| Philippines    | NA <sup>d</sup> | NA <sup>d</sup> | 2 | 3.43 | 15.18 | 361.01  | 25.23  | 1.39  | 18.7            | -1.9            | NA <sup>d</sup> | 4.75            | 68.37           |
| Qatar          | NA <sup>d</sup> | NA <sup>d</sup> | 4 | 3.81 | 76.00 | 221.97  | 2.88   | 0.02  | NA <sup>d</sup> | NA <sup>d</sup> | 0               | 0               | NA <sup>d</sup> |

|                      |                 |                 |   |      |       |        |      |      |                 |                 |   |                 |                 |
|----------------------|-----------------|-----------------|---|------|-------|--------|------|------|-----------------|-----------------|---|-----------------|-----------------|
| Switzerland          | NA <sup>d</sup> | NA <sup>d</sup> | 1 | 3.62 | 55.46 | 711.39 | 8.64 | 0.17 | 5.4             | -0.6            | 0 | NA <sup>d</sup> | 65.18           |
| United Arab Emirates | NA <sup>d</sup> | NA <sup>d</sup> | 1 | 3.81 | 90.88 | 375.45 | 5.51 | 0.25 | NA <sup>d</sup> | NA <sup>d</sup> | 0 | 10.125          | NA <sup>d</sup> |

Notes:

- a. Google Trends include indicators as insomnia and health literacy
- b. Increase in Google searches for “insomnia”.
- c. Google Trends number for “wash hands” and “face mask”.
- d. NA: not applicable. Indicates a country not ranked due to incomplete data.

**Supplementary Table S31. Complete ranking and raw scores of indicators in 50 countries and territories in September 2021**

| Country        | Rank | Performance score (with Google Trends) <sup>a</sup> | Concern indicators  |                        |                            |                                                       |                           |                   |              |                       |                       |                              | Performance score (without Google Trends) |                   |
|----------------|------|-----------------------------------------------------|---------------------|------------------------|----------------------------|-------------------------------------------------------|---------------------------|-------------------|--------------|-----------------------|-----------------------|------------------------------|-------------------------------------------|-------------------|
|                |      |                                                     | Government policy   |                        |                            | Vital health and socioeconomic measures               |                           |                   |              |                       |                       |                              |                                           | Hygiene education |
|                |      |                                                     | Lockdown efficiency | Health-system policies | People covered by vaccines | One-month cases per 100,000 members of the population | Infection growth rate (%) | Fatality rate (%) | GDP loss (%) | Unemployment rate (%) | Insomnia <sup>b</sup> | Health literacy <sup>c</sup> |                                           |                   |
| Colombia       | 1    | 74.72                                               | 4                   | 3.62                   | 39.41                      | 94.00                                                 | 0.98                      | 2.81              | 21.7         | -3.7                  | 0                     | 11.2                         | 80.15                                     |                   |
| Chile          | 2    | 73.86                                               | 2                   | 3.43                   | 84.39                      | 81.14                                                 | 0.95                      | 3.41              | 26.2         | -3.89                 | 0                     | 9.1                          | 80.26                                     |                   |
| Japan          | 3    | 72.62                                               | 4                   | 2.86                   | 65.39                      | 167.15                                                | 14.10                     | 0.75              | 7            | -0.2                  | 0                     | 18.6                         | 73.36                                     |                   |
| Peru           | 4    | 71.31                                               | 2                   | 3.62                   | 41.70                      | 77.08                                                 | 1.20                      | 4.29              | 20.4         | -6.5                  | -1                    | 11.2                         | 74.50                                     |                   |
| South Korea    | 5    | 70.95                                               | 4                   | 3.81                   | 62.18                      | 117.59                                                | 23.80                     | 0.34              | 5            | -1                    | 0                     | 10.5                         | 75.83                                     |                   |
| Poland         | 6    | 70.30                                               | 4                   | 3.24                   | 49.23                      | 48.68                                                 | 0.64                      | 1.66              | 7            | -0.5                  | 0                     | 13.1                         | 73.55                                     |                   |
| Czech Republic | 7    | 69.95                                               | 4                   | 3.62                   | 55.20                      | 114.69                                                | 0.73                      | 0.45              | 8            | -0.3                  | -2                    | 0.5                          | 77.43                                     |                   |
| Russia         | 8    | 69.92                                               | 3                   | 3.81                   | 30.94                      | 397.78                                                | 8.51                      | 4.06              | 7.8          | -2                    | -4                    | 18.2                         | 64.65                                     |                   |
| Spain          | 9    | 69.37                                               | 4                   | 3.43                   | 75.04                      | 222.54                                                | 2.14                      | 1.99              | 12           | -1.69                 | 2                     | 6.1                          | 79.11                                     |                   |
| Portugal       | 10   | 69.32                                               | 3                   | 3.62                   | 78.61                      | 308.34                                                | 3.02                      | 0.74              | 9.9          | -1.9                  | 0                     | 2.7                          | 78.19                                     |                   |
| Italy          | 11   | 69.31                                               | 2                   | 3.81                   | 70.37                      | 219.26                                                | 2.92                      | 1.28              | 9.1          | -0.7                  | 0                     | 13                           | 72.38                                     |                   |
| Denmark        | 12   | 69.23                                               | 4                   | 3.81                   | 76.14                      | 225.40                                                | 3.79                      | 0.55              | 5.8          | -1.5                  | 1                     | 1.2                          | 80.31                                     |                   |
| Taiwan         | 13   | 69.08                                               | 4                   | 3.81                   | 33.29                      | 0.96                                                  | 1.43                      | 3.07              | -0.56        | 0.14                  | -1                    | 18.9                         | 67.38                                     |                   |
| Canada         | 14   | 69.08                                               | 1                   | 3.62                   | 73.96                      | 327.19                                                | 8.26                      | 0.74              | 9.1          | -2.1                  | 0                     | 15.9                         | 70.45                                     |                   |
| France         | 15   | 69.01                                               | 3                   | 3.62                   | 70.71                      | 391.14                                                | 3.88                      | 0.85              | 6.8          | -1                    | 0                     | 9.1                          | 74.19                                     |                   |
| New Zealand    | 16   | 68.74                                               | 2                   | 3.62                   | 51.03                      | 14.09                                                 | 20.23                     | 0.14              | -0.7         | -1.9                  | 1                     | 22.2                         | 67.87                                     |                   |
| Hungary        | 17   | 68.35                                               | 4                   | 3.43                   | 62.86                      | 107.62                                                | 1.28                      | 1.27              | 10.7         | -0.5                  | 0                     | 1.6                          | 77.59                                     |                   |
| Austria        | 18   | 67.71                                               | 3                   | 3.62                   | 60.81                      | 605.88                                                | 7.96                      | 0.43              | 9.5          | -1.9                  | 0                     | 6.7                          | 73.91                                     |                   |
| India          | 19   | 67.19                                               | 2                   | 3.62                   | 31.81                      | 68.60                                                 | 2.91                      | 0.97              | 15.8         | 0.2                   | 1                     | 16.3                         | 69.25                                     |                   |
| Singapore      | 20   | 67.16                                               | 1                   | 4.00                   | 86.21                      | 529.94                                                | 42.74                     | 0.14              | 12.9         | -1                    | -1                    | 12.2                         | 68.75                                     |                   |
| Hong Kong      | 21   | 65.76                                               | 2                   | 3.62                   | 57.44                      | 1.39                                                  | 0.87                      | 0.95              | 9            | -1.9                  | 1                     | 5.7                          | 73.44                                     |                   |
| Germany        | 22   | 65.27                                               | 3                   | 3.62                   | 64.44                      | 326.69                                                | 6.91                      | 0.54              | 6.3          | 1.4                   | 0                     | 6.8                          | 70.82                                     |                   |

|                |                 |                 |   |      |       |         |       |      |                 |                 |                 |                 |                 |
|----------------|-----------------|-----------------|---|------|-------|---------|-------|------|-----------------|-----------------|-----------------|-----------------|-----------------|
| Argentina      | 23              | 65.27           | 2 | 3.43 | 56.69 | 156.30  | 1.37  | 4.72 | 22              | -3.5            | 0               | 5.1             | 71.77           |
| Brazil         | 24              | 64.68           | 2 | 3.24 | 55.89 | 244.07  | 3.11  | 3.11 | 7.9             | -2              | 0               | 13.4            | 66.36           |
| Saudi Arabia   | 25              | 64.05           | 2 | 3.81 | 59.58 | 10.80   | 0.70  | 5.35 | 11.6            | -1.9            | 2               | 14.9            | 67.51           |
| Netherlands    | 26              | 62.89           | 1 | 3.62 | 68.50 | 364.28  | 3.22  | 0.28 | 7.8             | -1.3            | 0               | 3.7             | 69.59           |
| Turkey         | 27              | 62.11           | 3 | 3.24 | 64.38 | 900.42  | 11.99 | 0.96 | 1.1             | -1.2            | -1              | 5.3             | 66.32           |
| United Kingdom | 28              | 61.82           | 1 | 3.62 | 69.37 | 1493.22 | 14.98 | 0.41 | 15.3            | -0.5            | -1              | 9.5             | 63.59           |
| Sweden         | 29              | 61.15           | 1 | 2.67 | 67.51 | 256.62  | 2.31  | 0.66 | 7.2             | -0.1            | 0               | 8.2             | 64.88           |
| Malaysia       | 30              | 60.58           | 3 | 3.43 | 68.53 | 1523.79 | 28.60 | 1.94 | -1.8            | -0.1            | 0               | 19.4            | 57.86           |
| Finland        | 31              | 59.88           | 1 | 3.24 | 68.04 | 259.00  | 11.30 | 0.35 | 6.8             | -0.6            | -1              | 0               | 66.52           |
| Australia      | 32              | 59.73           | 2 | 3.62 | 54.36 | 201.98  | 94.55 | 0.57 | 7.7             | -2.3            | -1              | 11              | 60.14           |
| Mexico         | 33              | 58.47           | 1 | 3.43 | 38.84 | 239.37  | 9.30  | 5.83 | 13.2            | -0.9            | 1               | 19.5            | 56.55           |
| United States  | 34              | 56.36           | 1 | 3.62 | 60.08 | 1246.41 | 10.54 | 1.41 | 7.8             | -3              | 5               | 13.7            | 62.74           |
| Thailand       | 35              | 55.43           | 3 | 3.24 | 32.90 | 570.04  | 33.10 | 1.29 | 6.1             | 0.35            | 1               | 5.9             | 60.41           |
| South Africa   | 36              | 52.74           | 1 | 3.81 | 14.58 | 208.21  | 4.50  | 4.29 | 9.1             | 4.1             | 0               | 14.9            | 50.59           |
| Vietnam        | 37              | 42.57           | 3 | 3.81 | 21.84 | 334.79  | 71.12 | 2.51 | -8.64           | 1.22            | 4               | 6               | 48.45           |
| Belgium        | NA <sup>d</sup> | NA <sup>d</sup> | 1 | 3.81 | 72.33 | 518.30  | 5.09  | 0.37 | 9.2             | 0               | NA <sup>d</sup> | NA <sup>d</sup> | 68.44           |
| China          | NA <sup>d</sup> | NA <sup>d</sup> | 4 | 3.62 | 76.56 | 0.09    | 1.33  | 0.00 | 0               | -0.5            | NA <sup>d</sup> | NA <sup>d</sup> | 79.02           |
| Egypt          | NA <sup>d</sup> | NA <sup>d</sup> | 4 | 3.05 | 8.13  | 15.43   | 5.58  | 3.70 | NA <sup>d</sup> | 0.2             | 0               | 6.8             | NA <sup>d</sup> |
| Greece         | NA <sup>d</sup> | NA <sup>d</sup> | 3 | 3.62 | 58.50 | 653.79  | 11.53 | 1.68 | 23.4            | -3.7            | 0               | NA <sup>d</sup> | 77.79           |
| Indonesia      | NA <sup>d</sup> | NA <sup>d</sup> | 2 | 3.62 | 25.73 | 45.34   | 3.06  | 7.12 | 7               | NA <sup>d</sup> | -1              | 16.3            | NA <sup>d</sup> |
| Ireland        | NA <sup>d</sup> | NA <sup>d</sup> | 1 | 3.62 | 72.85 | 752.27  | 10.64 | 0.42 | 3.3             | -1.9            | NA <sup>d</sup> | NA <sup>d</sup> | 65.95           |
| Israel         | NA <sup>d</sup> | NA <sup>d</sup> | 3 | 3.43 | 81.91 | 2323.39 | 20.24 | 0.33 | 7.27            | 0.5             | 0               | NA <sup>d</sup> | 61.85           |
| Norway         | NA <sup>d</sup> | NA <sup>d</sup> | 1 | 3.62 | 71.95 | 535.29  | 18.27 | 0.16 | 5.3             | -1.2            | 0               | NA <sup>d</sup> | 66.33           |
| Pakistan       | NA <sup>d</sup> | NA <sup>d</sup> | 2 | 3.62 | 18.39 | 36.79   | 7.12  | 2.29 | NA <sup>d</sup> | NA <sup>d</sup> | NA <sup>d</sup> | NA <sup>d</sup> | NA <sup>d</sup> |
| Philippines    | NA <sup>d</sup> | NA <sup>d</sup> | 3 | 3.62 | 20.53 | 504.39  | 28.15 | 0.87 | 18.7            | -1.1            | NA <sup>d</sup> | 9.4             | 67.91           |
| Qatar          | NA <sup>d</sup> | NA <sup>d</sup> | 2 | 4.00 | 80.41 | 133.05  | 1.68  | 0.10 | NA <sup>d</sup> | NA <sup>d</sup> | 0               | 3.4             | NA <sup>d</sup> |

|                      |                 |                 |   |      |        |        |      |      |                 |                 |   |                 |                 |
|----------------------|-----------------|-----------------|---|------|--------|--------|------|------|-----------------|-----------------|---|-----------------|-----------------|
| Switzerland          | NA <sup>d</sup> | NA <sup>d</sup> | 1 | 3.62 | 60.20  | 696.43 | 7.79 | 0.31 | 5.4             | -0.6            | 1 | NA <sup>d</sup> | 64.33           |
| United Arab Emirates | NA <sup>d</sup> | NA <sup>d</sup> | 4 | 3.81 | 100.35 | 176.38 | 2.45 | 0.32 | NA <sup>d</sup> | NA <sup>d</sup> | 0 | 14.6            | NA <sup>d</sup> |

Notes:

- a. Google Trends include indicators as insomnia and health literacy
- b. Increase in Google searches for “insomnia”.
- c. Google Trends number for “wash hands” and “face mask”.
- d. NA: not applicable. Indicates a country not ranked due to incomplete data.

**Supplementary Table S32. Complete ranking and raw scores of indicators in 50 countries and territories in October 2021**

| Country     | Rank | Performance score (with Google Trends) <sup>a</sup> | Concern indicators  |                        |                            |                                                       |                           |                   |                 |                       |                       |                              | Performance score (without Google Trends) |                   |
|-------------|------|-----------------------------------------------------|---------------------|------------------------|----------------------------|-------------------------------------------------------|---------------------------|-------------------|-----------------|-----------------------|-----------------------|------------------------------|-------------------------------------------|-------------------|
|             |      |                                                     | Government policy   |                        |                            | Vital health and socioeconomic measures               |                           |                   |                 |                       |                       |                              |                                           | Hygiene education |
|             |      |                                                     | Lockdown efficiency | Health-system policies | People covered by vaccines | One-month cases per 100,000 members of the population | Infection growth rate (%) | Fatality rate (%) | GDP loss (%)    | Unemployment rate (%) | Insomnia <sup>b</sup> | Health literacy <sup>c</sup> |                                           |                   |
| Chile       | 1    | 78.40                                               | 4                   | 3.43                   | 96.15                      | 212.28                                                | 2.47                      | 0.71              | NA <sup>d</sup> | -3.5                  | 1                     | 12.5                         | 87.47                                     |                   |
| Peru        | 2    | 76.05                                               | 2                   | 3.81                   | 53.04                      | 79.41                                                 | 1.22                      | 3.32              | NA <sup>d</sup> | -6.8                  | -1                    | 16.125                       | 77.35                                     |                   |
| Canada      | 3    | 73.32                                               | 3                   | 3.62                   | 77.08                      | 241.30                                                | 5.63                      | 1.21              | NA <sup>d</sup> | -2.2                  | 0                     | 13.25                        | 77.79                                     |                   |
| Italy       | 4    | 71.46                                               | 2                   | 3.81                   | 74.52                      | 165.01                                                | 2.13                      | 1.18              | NA <sup>d</sup> | -0.6                  | -1                    | 12.625                       | 72.78                                     |                   |
| Malaysia    | 5    | 71.20                                               | 3                   | 3.62                   | 77.25                      | 689.36                                                | 10.06                     | 1.14              | NA <sup>d</sup> | -0.4                  | -1                    | 17.125                       | 70.73                                     |                   |
| Brazil      | 6    | 69.91                                               | 4                   | 3.24                   | 65.34                      | 178.63                                                | 1.78                      | 2.89              | NA <sup>d</sup> | -2.2                  | 0                     | 6                            | 76.17                                     |                   |
| Taiwan      | 7    | 69.69                                               | 4                   | 3.43                   | 52.13                      | 0.79                                                  | 1.17                      | 2.65              | NA <sup>d</sup> | 0.07                  | 0                     | 14.375                       | 72.69                                     |                   |
| Sweden      | 8    | 69.67                                               | 4                   | 2.67                   | 71.98                      | 183.32                                                | 1.62                      | 0.86              | NA <sup>d</sup> | -0.2                  | 0                     | 7.625                        | 75.25                                     |                   |
| Hong Kong   | 9    | 69.41                                               | 2                   | 3.62                   | 59.87                      | 1.71                                                  | 1.06                      | 0.00              | NA <sup>d</sup> | -2.1                  | 0                     | 4.75                         | 76.00                                     |                   |
| Colombia    | 10   | 69.33                                               | 4                   | 3.62                   | 46.23                      | 87.99                                                 | 0.91                      | 2.18              | NA <sup>d</sup> | -2.9                  | 2                     | 14.5                         | 77.90                                     |                   |
| South Korea | 11   | 69.11                                               | 2                   | 3.81                   | 76.56                      | 102.55                                                | 16.77                     | 0.69              | NA <sup>d</sup> | -1                    | 0                     | 11.125                       | 73.19                                     |                   |
| Poland      | 12   | 68.92                                               | 4                   | 3.24                   | 51.68                      | 312.66                                                | 4.07                      | 1.14              | NA <sup>d</sup> | -0.6                  | 0                     | 10.875                       | 73.04                                     |                   |
| Mexico      | 13   | 67.24                                               | 4                   | 3.43                   | 48.49                      | 109.77                                                | 3.90                      | 7.59              | NA <sup>d</sup> | -0.8                  | 1                     | 37.5                         | 63.60                                     |                   |
| Austria     | 14   | 65.60                                               | 3                   | 3.62                   | 64.17                      | 971.86                                                | 11.83                     | 0.40              | NA <sup>d</sup> | -2.2                  | 0                     | 5.5                          | 70.82                                     |                   |
| Japan       | 15   | 64.58                                               | 2                   | 2.86                   | 75.10                      | 13.70                                                 | 1.01                      | 3.56              | NA <sup>d</sup> | -0.4                  | 0                     | 14.25                        | 66.17                                     |                   |
| Russia      | 16   | 64.01                                               | 3                   | 3.62                   | 35.80                      | 669.50                                                | 13.20                     | 3.14              | NA <sup>d</sup> | -2                    | -1                    | 12.375                       | 63.30                                     |                   |
| Turkey      | 17   | 63.68                                               | 3                   | 3.24                   | 68.37                      | 1033.50                                               | 12.29                     | 0.75              | NA <sup>d</sup> | -1.7                  | 0                     | 6.25                         | 68.06                                     |                   |
| Australia   | 18   | 63.33                                               | 3                   | 3.62                   | 69.03                      | 251.47                                                | 60.50                     | 0.67              | NA <sup>d</sup> | -1.8                  | 1                     | 9.375                        | 69.28                                     |                   |
| Denmark     | 19   | 62.91                                               | 1                   | 3.62                   | 78.75                      | 498.63                                                | 8.08                      | 0.20              | NA <sup>d</sup> | -1.5                  | 0                     | 0.75                         | 69.18                                     |                   |
| Finland     | 20   | 62.76                                               | 1                   | 3.24                   | 74.01                      | 287.99                                                | 11.29                     | 0.49              | NA <sup>d</sup> | -1.4                  | 0                     | 4.5                          | 67.55                                     |                   |
| Netherlands | 21   | 62.41                                               | 1                   | 3.62                   | 70.12                      | 752.42                                                | 6.44                      | 0.19              | NA <sup>d</sup> | -1.4                  | 0                     | 7.5                          | 65.96                                     |                   |
| Hungary     | 22   | 60.28                                               | 1                   | 3.62                   | 66.14                      | 422.60                                                | 4.95                      | 1.32              | NA <sup>d</sup> | -0.5                  | 0                     | 4.25                         | 64.46                                     |                   |
| Germany     | 23   | 59.00                                               | 1                   | 3.62                   | 66.84                      | 438.84                                                | 8.68                      | 0.55              | NA <sup>d</sup> | 1.3                   | 0                     | 6                            | 62.15                                     |                   |

|                |                 |                 |   |      |        |         |        |      |                 |                 |                 |                 |                 |
|----------------|-----------------|-----------------|---|------|--------|---------|--------|------|-----------------|-----------------|-----------------|-----------------|-----------------|
| Czech Republic | 24              | 57.69           | 1 | 3.62 | 57.27  | 665.88  | 4.22   | 0.41 | NA <sup>d</sup> | -0.3            | 0               | 0.375           | 62.60           |
| United Kingdom | 25              | 57.39           | 1 | 3.62 | 76.10  | 1835.63 | 16.01  | 0.32 | NA <sup>d</sup> | -0.7            | -1              | 9.625           | 55.84           |
| United States  | 26              | 52.44           | 1 | 3.43 | 64.36  | 752.68  | 5.76   | 1.91 | NA <sup>d</sup> | -2.3            | 4               | 11.625          | 63.00           |
| Argentina      | NA <sup>d</sup> | NA <sup>d</sup> | 4 | 3.43 | 65.84  | 69.96   | 0.61   | 2.42 | NA <sup>d</sup> | NA <sup>d</sup> | 0               | 4.375           | NA <sup>d</sup> |
| Belgium        | NA <sup>d</sup> | NA <sup>d</sup> | 1 | 3.62 | 75.63  | 994.61  | 9.29   | 0.34 | NA <sup>d</sup> | 0.5             | NA <sup>d</sup> | NA <sup>d</sup> | 60.96           |
| China          | NA <sup>d</sup> | NA <sup>d</sup> | 2 | 3.62 | 78.73  | 0.07    | 1.12   | 0.00 | NA <sup>d</sup> | -0.4            | NA <sup>d</sup> | NA <sup>d</sup> | 75.92           |
| Egypt          | NA <sup>d</sup> | NA <sup>d</sup> | 4 | 3.05 | 13.34  | 25.41   | 8.70   | 4.98 | NA <sup>d</sup> | NA <sup>d</sup> | 0               | 14.375          | NA <sup>d</sup> |
| France         | NA <sup>d</sup> | NA <sup>d</sup> | 3 | 3.43 | 73.85  | 227.81  | 2.18   | 0.64 | NA <sup>d</sup> | NA <sup>d</sup> | -1              | 5.5             | NA <sup>d</sup> |
| Greece         | NA <sup>d</sup> | NA <sup>d</sup> | 3 | 3.62 | 61.19  | 833.14  | 13.18  | 1.28 | NA <sup>d</sup> | -3.1            | 0               | NA <sup>d</sup> | 71.23           |
| India          | NA <sup>d</sup> | NA <sup>d</sup> | 2 | 3.62 | 38.13  | 37.25   | 1.54   | 1.95 | NA <sup>d</sup> | NA <sup>d</sup> | 0               | 15.75           | NA <sup>d</sup> |
| Indonesia      | NA <sup>d</sup> | NA <sup>d</sup> | 2 | 3.05 | 34.98  | 10.59   | 0.69   | 5.01 | NA <sup>d</sup> | NA <sup>d</sup> | 3               | 20.875          | NA <sup>d</sup> |
| Ireland        | NA <sup>d</sup> | NA <sup>d</sup> | 1 | 3.62 | 75.86  | 1117.06 | 14.27  | 0.34 | NA <sup>d</sup> | -1.2            | NA <sup>d</sup> | NA <sup>d</sup> | 62.38           |
| Israel         | NA <sup>d</sup> | NA <sup>d</sup> | 3 | 3.43 | 85.88  | 486.92  | 3.53   | 0.75 | NA <sup>d</sup> | 0.2             | 2               | NA <sup>d</sup> | 73.47           |
| New Zealand    | NA <sup>d</sup> | NA <sup>d</sup> | 2 | 3.62 | 67.10  | 44.96   | 53.67  | 0.04 | NA <sup>d</sup> | NA <sup>d</sup> | 0               | 13.5            | NA <sup>d</sup> |
| Norway         | NA <sup>d</sup> | NA <sup>d</sup> | 1 | 3.24 | 73.72  | 326.57  | 9.42   | 0.22 | NA <sup>d</sup> | NA <sup>d</sup> | 0               | NA <sup>d</sup> | NA <sup>d</sup> |
| Pakistan       | NA <sup>d</sup> | NA <sup>d</sup> | 4 | 3.81 | 22.98  | 12.00   | 2.17   | 2.48 | NA <sup>d</sup> | NA <sup>d</sup> | NA <sup>d</sup> | NA <sup>d</sup> | NA <sup>d</sup> |
| Philippines    | NA <sup>d</sup> | NA <sup>d</sup> | 3 | 4.00 | 26.71  | 213.70  | 9.31   | 2.06 | NA <sup>d</sup> | -1.3            | NA <sup>d</sup> | 19.875          | 67.97           |
| Portugal       | NA <sup>d</sup> | NA <sup>d</sup> | 1 | 3.62 | 79.77  | 210.19  | 2.00   | 0.85 | NA <sup>d</sup> | NA <sup>d</sup> | 0               | 4               | NA <sup>d</sup> |
| Qatar          | NA <sup>d</sup> | NA <sup>d</sup> | 2 | 3.62 | 82.49  | 88.86   | 1.10   | 0.15 | NA <sup>d</sup> | NA <sup>d</sup> | 0               | 0               | NA <sup>d</sup> |
| Saudi Arabia   | NA <sup>d</sup> | NA <sup>d</sup> | 2 | 3.81 | 64.69  | 4.20    | 0.27   | 5.26 | NA <sup>d</sup> | NA <sup>d</sup> | 0               | 10.25           | NA <sup>d</sup> |
| Singapore      | NA <sup>d</sup> | NA <sup>d</sup> | 3 | 4.00 | 86.97  | 1867.63 | 105.52 | 0.31 | NA <sup>d</sup> | NA <sup>d</sup> | 0               | 10.125          | NA <sup>d</sup> |
| South Africa   | NA <sup>d</sup> | NA <sup>d</sup> | 4 | 3.81 | 18.64  | 32.38   | 0.67   | 7.98 | NA <sup>d</sup> | NA <sup>d</sup> | 0               | 7.5             | NA <sup>d</sup> |
| Spain          | NA <sup>d</sup> | NA <sup>d</sup> | 4 | 3.62 | 77.08  | 111.36  | 1.05   | 1.83 | NA <sup>d</sup> | NA <sup>d</sup> | 1               | 27.875          | NA <sup>d</sup> |
| Switzerland    | NA <sup>d</sup> | NA <sup>d</sup> | 3 | 3.62 | 63.82  | 369.40  | 3.83   | 0.46 | NA <sup>d</sup> | -0.7            | 0               | NA <sup>d</sup> | 73.70           |
| Thailand       | NA <sup>d</sup> | NA <sup>d</sup> | 3 | 3.43 | 53.89  | 441.09  | 19.24  | 0.80 | NA <sup>d</sup> | NA <sup>d</sup> | -1              | 5.125           | NA <sup>d</sup> |
| United Arab    | NA <sup>d</sup> | NA <sup>d</sup> | 4 | 3.62 | 105.72 | 39.16   | 0.53   | 1.00 | NA <sup>d</sup> | NA <sup>d</sup> | 0               | 7.75            | NA <sup>d</sup> |

Emirates

---

|         |                 |                 |   |      |       |        |       |      |                 |                 |   |   |                 |
|---------|-----------------|-----------------|---|------|-------|--------|-------|------|-----------------|-----------------|---|---|-----------------|
| Vietnam | NA <sup>d</sup> | NA <sup>d</sup> | 2 | 3.81 | 41.73 | 132.80 | 16.49 | 2.13 | NA <sup>d</sup> | NA <sup>d</sup> | 0 | 6 | NA <sup>d</sup> |
|---------|-----------------|-----------------|---|------|-------|--------|-------|------|-----------------|-----------------|---|---|-----------------|

---

Notes:

- a. Google Trends include indicators as insomnia and health literacy
- b. Increase in Google searches for “insomnia”.
- c. Google Trends number for “wash hands” and “face mask”.
- d. NA: not applicable. Indicates a country not ranked due to incomplete data.



**Supplementary Table S33. Complete ranking and raw scores of indicators in 50 countries and territories in November 2021**

| Country        | Rank            | Performance score (with Google Trends) <sup>a</sup> | Concern indicators  |                        |                            |                                                       |                           |                   |                 |                       |                       |                              | Performance score (without Google Trends) |                   |
|----------------|-----------------|-----------------------------------------------------|---------------------|------------------------|----------------------------|-------------------------------------------------------|---------------------------|-------------------|-----------------|-----------------------|-----------------------|------------------------------|-------------------------------------------|-------------------|
|                |                 |                                                     | Government policy   |                        |                            | Vital health and socioeconomic measures               |                           |                   |                 |                       |                       |                              |                                           | Hygiene education |
|                |                 |                                                     | Lockdown efficiency | Health-system policies | People covered by vaccines | One-month cases per 100,000 members of the population | Infection growth rate (%) | Fatality rate (%) | GDP loss (%)    | Unemployment rate (%) | Insomnia <sup>b</sup> | Health literacy <sup>c</sup> |                                           |                   |
| Italy          | 1               | 81.12                                               | 3                   | 3.81                   | 80.02                      | 425.03                                                | 5.38                      | 0.67              | NA <sup>d</sup> | -9.6                  | -1                    | -1                           | 87.65                                     |                   |
| Taiwan         | 2               | 74.70                                               | 4                   | 3.62                   | 66.12                      | 0.79                                                  | 1.15                      | 0.53              | NA <sup>d</sup> | -0.06                 | -2                    | -2                           | 78.33                                     |                   |
| Malaysia       | 3               | 72.86                                               | 3                   | 3.62                   | 81.83                      | 491.64                                                | 6.52                      | 0.94              | NA <sup>d</sup> | -4.8                  | 0                     | 0                            | 80.12                                     |                   |
| Chile          | 4               | 72.13                                               | 1                   | 3.43                   | 106.87                     | 352.39                                                | 3.99                      | 0.87              | NA <sup>d</sup> | -3.3                  | 0                     | 0                            | 75.39                                     |                   |
| South Korea    | 5               | 71.64                                               | 4                   | 3.81                   | 83.26                      | 167.55                                                | 23.46                     | 0.93              | NA <sup>d</sup> | -1.1                  | 0                     | 0                            | 77.87                                     |                   |
| Peru           | 6               | 71.63                                               | 2                   | 3.81                   | 63.56                      | 103.58                                                | 1.57                      | 2.69              | NA <sup>d</sup> | -6                    | 1                     | 1                            | 76.23                                     |                   |
| Japan          | 7               | 70.34                                               | 4                   | 2.86                   | 78.25                      | 3.41                                                  | 0.25                      | 2.17              | NA <sup>d</sup> | -0.2                  | 0                     | 0                            | 75.90                                     |                   |
| Mexico         | 8               | 69.86                                               | 4                   | 3.43                   | 50.91                      | 59.38                                                 | 2.03                      | 7.22              | NA <sup>d</sup> | -0.7                  | 0                     | 0                            | 67.60                                     |                   |
| Sweden         | 9               | 69.10                                               | 4                   | 2.67                   | 78.22                      | 328.21                                                | 2.85                      | 0.38              | NA <sup>d</sup> | -0.2                  | 0                     | 0                            | 75.63                                     |                   |
| Canada         | 10              | 69.00                                               | 2                   | 3.62                   | 79.74                      | 203.22                                                | 4.49                      | 0.93              | NA <sup>d</sup> | -2.5                  | 0                     | 0                            | 74.69                                     |                   |
| Colombia       | 11              | 66.65                                               | 2                   | 3.62                   | 56.10                      | 131.19                                                | 1.34                      | 1.85              | NA <sup>d</sup> | -2.5                  | 1                     | 1                            | 70.68                                     |                   |
| Australia      | 12              | 64.72                                               | 2                   | 3.81                   | 76.16                      | 153.66                                                | 23.03                     | 0.68              | NA <sup>d</sup> | -2.2                  | 0                     | 0                            | 71.49                                     |                   |
| Hong Kong      | 13              | 64.60                                               | 2                   | 3.62                   | 62.61                      | 1.19                                                  | 0.73                      | 0.00              | NA <sup>d</sup> | -2.2                  | 1                     | 1                            | 74.18                                     |                   |
| Russia         | 14              | 61.88                                               | 3                   | 3.62                   | 43.46                      | 747.48                                                | 13.02                     | 3.27              | NA <sup>d</sup> | -1.8                  | 0                     | 0                            | 65.03                                     |                   |
| Germany        | 15              | 58.94                                               | 3                   | 3.62                   | 73.89                      | 1568.06                                               | 28.55                     | 0.46              | NA <sup>d</sup> | 1.2                   | -1                    | -1                           | 63.21                                     |                   |
| Netherlands    | 16              | 56.88                                               | 3                   | 3.81                   | 72.12                      | 2976.85                                               | 23.93                     | 0.20              | NA <sup>d</sup> | -1.3                  | 0                     | 0                            | 62.56                                     |                   |
| Finland        | 17              | 56.69                                               | 1                   | 3.24                   | 77.53                      | 522.80                                                | 18.41                     | 0.61              | NA <sup>d</sup> | -0.9                  | 0                     | 0                            | 63.86                                     |                   |
| United States  | 18              | 55.53                                               | 1                   | 3.62                   | 70.47                      | 766.37                                                | 5.55                      | 1.34              | NA <sup>d</sup> | -2.5                  | 5                     | 5                            | 66.74                                     |                   |
| Poland         | 19              | 54.86                                               | 1                   | 3.43                   | 55.13                      | 1362.05                                               | 17.02                     | 1.28              | NA <sup>d</sup> | -0.7                  | 0                     | 0                            | 56.86                                     |                   |
| Austria        | 20              | 54.17                                               | 3                   | 3.62                   | 77.56                      | 3638.30                                               | 39.59                     | 0.34              | NA <sup>d</sup> | -2.5                  | 0                     | 0                            | 58.67                                     |                   |
| Hungary        | 21              | 48.26                                               | 1                   | 3.43                   | 74.12                      | 2487.91                                               | 27.76                     | 1.58              | NA <sup>d</sup> | -0.8                  | 0                     | 0                            | 53.25                                     |                   |
| Czech Republic | 22              | 44.96                                               | 1                   | 3.62                   | 63.12                      | 3609.85                                               | 21.96                     | 0.60              | NA <sup>d</sup> | -0.5                  | 0                     | 0                            | 49.64                                     |                   |
| Argentina      | NA <sup>d</sup> | NA <sup>d</sup>                                     | 4                   | 3.62                   | 75.10                      | 91.96                                                 | 0.79                      | 1.52              | NA <sup>d</sup> | NA <sup>d</sup>       | 0                     | 0                            | NA <sup>d</sup>                           |                   |

|                      |                 |                 |   |      |        |         |       |       |                 |                 |                 |                 |                 |
|----------------------|-----------------|-----------------|---|------|--------|---------|-------|-------|-----------------|-----------------|-----------------|-----------------|-----------------|
| Belgium              | NA <sup>d</sup> | NA <sup>d</sup> | 3 | 3.62 | 81.25  | 3484.98 | 29.79 | 0.25  | NA <sup>d</sup> | NA <sup>d</sup> | NA <sup>d</sup> | NA <sup>d</sup> | NA <sup>d</sup> |
| Brazil               | NA <sup>d</sup> | NA <sup>d</sup> | 2 | 3.43 | 72.31  | 133.42  | 1.31  | 2.42  | NA <sup>d</sup> | NA <sup>d</sup> | 0               | 0               | NA <sup>d</sup> |
| China                | NA <sup>d</sup> | NA <sup>d</sup> | 2 | 3.62 | 86.83  | 0.11    | 1.63  | 0.00  | NA <sup>d</sup> | -0.2            | NA <sup>d</sup> | NA <sup>d</sup> | 75.22           |
| Denmark              | NA <sup>d</sup> | NA <sup>d</sup> | 1 | 3.43 | 84.53  | 1713.62 | 25.69 | 0.18  | NA <sup>d</sup> | NA <sup>d</sup> | 0               | 0               | NA <sup>d</sup> |
| Egypt                | NA <sup>d</sup> | NA <sup>d</sup> | 4 | 2.86 | 19.49  | 26.44   | 8.33  | 6.61  | NA <sup>d</sup> | NA <sup>d</sup> | 0               | 0               | NA <sup>d</sup> |
| France               | NA <sup>d</sup> | NA <sup>d</sup> | 3 | 3.43 | 78.74  | 754.58  | 7.05  | 0.29  | NA <sup>d</sup> | NA <sup>d</sup> | 0               | 0               | NA <sup>d</sup> |
| Greece               | NA <sup>d</sup> | NA <sup>d</sup> | 3 | 3.62 | 69.01  | 1897.00 | 26.51 | 1.13  | NA <sup>d</sup> | NA <sup>d</sup> | 0               | 0               | NA <sup>d</sup> |
| India                | NA <sup>d</sup> | NA <sup>d</sup> | 4 | 3.81 | 44.39  | 22.32   | 0.91  | 3.48  | NA <sup>d</sup> | NA <sup>d</sup> | 0               | 0               | NA <sup>d</sup> |
| Indonesia            | NA <sup>d</sup> | NA <sup>d</sup> | 2 | 3.05 | 42.13  | 4.36    | 0.28  | 3.53  | NA <sup>d</sup> | NA <sup>d</sup> | 4               | 4               | NA <sup>d</sup> |
| Ireland              | NA <sup>d</sup> | NA <sup>d</sup> | 1 | 3.62 | 83.26  | 2498.96 | 27.94 | 0.17  | NA <sup>d</sup> | -1              | NA <sup>d</sup> | NA <sup>d</sup> | 57.28           |
| Israel               | NA <sup>d</sup> | NA <sup>d</sup> | 2 | 3.43 | 87.28  | 174.38  | 1.22  | 0.59  | NA <sup>d</sup> | -0.3            | 1               | 1               | 73.42           |
| New Zealand          | NA <sup>d</sup> | NA <sup>d</sup> | 2 | 3.62 | 74.01  | 100.12  | 77.78 | 0.31  | NA <sup>d</sup> | NA <sup>d</sup> | 0               | 0               | NA <sup>d</sup> |
| Norway               | NA <sup>d</sup> | NA <sup>d</sup> | 1 | 3.62 | 79.49  | 1108.07 | 29.22 | 0.25  | NA <sup>d</sup> | NA <sup>d</sup> | 0               | 0               | NA <sup>d</sup> |
| Pakistan             | NA <sup>d</sup> | NA <sup>d</sup> | 4 | 3.81 | 27.32  | 5.19    | 0.92  | 2.40  | NA <sup>d</sup> | NA <sup>d</sup> | NA <sup>d</sup> | NA <sup>d</sup> | NA <sup>d</sup> |
| Philippines          | NA <sup>d</sup> | NA <sup>d</sup> | 4 | 3.81 | 38.91  | 40.94   | 1.63  | 11.82 | NA <sup>d</sup> | NA <sup>d</sup> | NA <sup>d</sup> | NA <sup>d</sup> | NA <sup>d</sup> |
| Portugal             | NA <sup>d</sup> | NA <sup>d</sup> | 1 | 3.62 | 86.40  | 556.63  | 5.19  | 0.50  | NA <sup>d</sup> | NA <sup>d</sup> | 0               | 0               | NA <sup>d</sup> |
| Qatar                | NA <sup>d</sup> | NA <sup>d</sup> | 2 | 3.62 | 84.96  | 143.32  | 1.76  | 0.02  | NA <sup>d</sup> | NA <sup>d</sup> | 0               | 0               | NA <sup>d</sup> |
| Saudi Arabia         | NA <sup>d</sup> | NA <sup>d</sup> | 2 | 3.62 | 67.12  | 3.21    | 0.21  | 3.70  | NA <sup>d</sup> | NA <sup>d</sup> | 1               | 1               | NA <sup>d</sup> |
| Singapore            | NA <sup>d</sup> | NA <sup>d</sup> | 1 | 4.00 | 86.97  | 1216.65 | 33.45 | 0.47  | NA <sup>d</sup> | NA <sup>d</sup> | 0               | 0               | NA <sup>d</sup> |
| South Africa         | NA <sup>d</sup> | NA <sup>d</sup> | 4 | 3.81 | 21.33  | 45.55   | 1.57  | 2.44  | NA <sup>d</sup> | NA <sup>d</sup> | 0               | 0               | NA <sup>d</sup> |
| Spain                | NA <sup>d</sup> | NA <sup>d</sup> | 4 | 3.62 | 82.02  | 327.38  | 3.05  | 0.45  | NA <sup>d</sup> | NA <sup>d</sup> | 0               | 0               | NA <sup>d</sup> |
| Switzerland          | NA <sup>d</sup> | NA <sup>d</sup> | 3 | 3.62 | 68.67  | 1630.48 | 16.29 | 0.20  | NA <sup>d</sup> | -0.8            | 1               | 1               | 67.36           |
| Thailand             | NA <sup>d</sup> | NA <sup>d</sup> | 3 | 3.81 | 66.02  | 291.42  | 10.66 | 0.77  | NA <sup>d</sup> | NA <sup>d</sup> | -4              | -4              | NA <sup>d</sup> |
| Turkey               | NA <sup>d</sup> | NA <sup>d</sup> | 3 | 3.24 | 70.78  | 899.08  | 9.52  | 0.81  | NA <sup>d</sup> | NA <sup>d</sup> | -1              | -1              | NA <sup>d</sup> |
| United Arab Emirates | NA <sup>d</sup> | NA <sup>d</sup> | 4 | 3.62 | 109.33 | 21.38   | 0.29  | 0.51  | NA <sup>d</sup> | NA <sup>d</sup> | 0               | 0               | NA <sup>d</sup> |
| United Kingdom       | NA <sup>d</sup> | NA <sup>d</sup> | 1 | 3.62 | 85.04  | 1724.53 | 12.97 | 0.37  | NA <sup>d</sup> | NA <sup>d</sup> | 0               | 0               | NA <sup>d</sup> |

|         |                 |                 |   |      |       |        |       |      |                 |                 |   |   |                 |
|---------|-----------------|-----------------|---|------|-------|--------|-------|------|-----------------|-----------------|---|---|-----------------|
| Vietnam | NA <sup>d</sup> | NA <sup>d</sup> | 3 | 3.81 | 62.18 | 322.87 | 34.41 | 1.00 | NA <sup>d</sup> | NA <sup>d</sup> | 0 | 0 | NA <sup>d</sup> |
|---------|-----------------|-----------------|---|------|-------|--------|-------|------|-----------------|-----------------|---|---|-----------------|

Notes:

- a. Google Trends include indicators as insomnia and health literacy
- b. Increase in Google searches for “insomnia”.
- c. Google Trends number for “wash hands” and “face mask”.
- d. NA: not applicable. Indicates a country not ranked due to incomplete data.

## Supplementary Information 13. Sensitivity analysis

In our study, we assess the national performance in response to COVID-19 and focus on “government policy & hygiene education” and the “vital health & socioeconomic” measures. Government policy & hygiene education includes (1) lockdown efficiency, (2) health-system policies, and (3) health literacy. The vital health & socioeconomic measures include (1) one-month cases per 100,000 members of the population, (2) the infection growth rate, (3) the fatality rate, (4) GDP loss due to the pandemic, (5) the unemployment rate, and (6) insomnia. In our analysis, we use Google Trends to obtain searching trends, including “wash hands” and “face mask” as surrogates for health literacy, and “insomnia” as a surrogate for the impact of the pandemic on mental health. We convert the performance score to a scale of 0–100, with 0 being the worst performance, and rank the 50 countries and territories based on their performance each month. In this section, we conduct sensitivity analysis of COVID-19 pandemic containment performance for the 50 selected countries and territories.

Supplementary Table S34 lists the countries and places included in the analysis and Supplementary Table S35 demonstrates the nine scenarios evaluated. Because there is yet any data of the GDP annual growth rate from October to November 2020 at the time of the analysis for the 50 countries and territories, the indicator of GDP loss from October to November 2020 is not included in the analysis. Similarly, for the unemployment rate from March to November 2020, complete data was not available from several countries, such as Argentina, Belgium, Brazil, Egypt, France, Greece, Indonesia, New Zealand, Norway, Pakistan, Portugal, Qatar, Saudi Arabia, Singapore, South Africa, Spain, Thailand, Turkey, the United Arab Emirates, the United Kingdom, and Vietnam.

### (1) Sensitivity analysis by changing the indicators’ calculations.

We alter the calculation method of several parameters to conduct sensitivity analysis. The results of the sensitivity analyses are shown in Supplementary Tables S36–S40.

Supplementary Table S36 shows the rankings of 50 countries and territories from March 2020 to November 2020 that exclude indicators of health literacy and insomnia. We change the calculation method of the health-system policies indicator from calculating the highest frequency in each month to calculating the average of each month (one-way sensitivity analysis). Supplementary Table S37 shows the ranking of 50 places from March 2020 to November 2020 by a three-month moving average that excludes indicators of health literacy and insomnia. By using the moving average, we can smooth score data and create a constantly updating average score for the three-month period. We change the calculation method of the health-system policies indicator to calculate the average of each month (two-way sensitivity analysis). The results show that the ranking of Supplementary Table S36 is similar to the ranking of Supplementary Table S37. The leading nations are mostly based in Asia and Oceania, including Taiwan, Vietnam, Korea, Thailand, and New Zealand; the countries whose performance needs to be improved are mostly located in America and Europe, including the United States, the United Kingdom, Canada, Colombia, Peru, and Sweden.

Supplementary Tables S38 and S39 show the rankings in 50 countries from March 2020 to October 2020 that exclude indicators of health literacy and insomnia. We change the calculation method of lockdown efficiency, one-month cases per 100,000 members of the population, and the fatality rate. The identification for lockdown efficiency score changes from comparing the average stringency index of the last two weeks of the month with the total incidence for the first two weeks of the month to comparing the average stringency index with the total incidence for the last two weeks of the month. For the sensitivity analysis, the fatality rate is calculated by dividing cumulative fatalities by cumulative infections. We replace the indicator of one-month cases per 100,000 members of the population in Supplementary Table S38 to be calculated by the cumulative number of diagnosed COVID-19 cases instead. The comparison between Supplementary Tables S38 and S39 shows that Taiwan is among the top ranking from March 2020 to October 2020 and that most Asian countries are still in the lead.

Supplementary Table S40 shows the results of the ranking of 50 countries and territories from March 2020 to October 2020 excluding the indicators health literacy, insomnia, and the unemployment rate. In Supplementary Table S40, we change the calculation method for both indicators of lockdown efficiency and the fatality rate. For the purpose of sensitivity analysis, the lockdown efficiency is redefined as the

ratio of the total incidence against the average stringency index for the last two weeks of the month. The indicator of the fatality rate is also modified as calculating the ratio of cumulative deaths to cumulative infections. As some countries do not have unemployment rate data in certain months, for the sensitivity analysis, we excluded the unemployment rate indicator to confirm whether the unemployment rate indicator will affect the ranking. The comparison between Supplementary Tables S39 and S40 shows that the leading nations are still mostly located in Asia and Oceania, including Taiwan, Vietnam, Korea, Malaysia, Singapore, Australia, and New Zealand.

(2) Sensitivity analysis of the inclusion or exclusion of Google Trends data.

To conduct sensitivity analysis between including and excluding Google Trends data, we create Supplementary Tables S41, S42, S43 and S44 and compared those with Supplementary Tables S36, S37, S38, and S39 respectively (i.e., Supplementary Table S41 is compared to Supplementary Table S36; Supplementary Table S42 is compared to Supplementary Table S37; Supplementary Table S43 is compared to Supplementary Table S38; Supplementary Table S44 is compared to Supplementary Table S39).

Supplementary Table S41 shows the rankings of the 50 countries and territories from March 2020 to November 2020. This analysis included indicators of health literacy and insomnia. We change the calculation method of the health-system policies indicator from calculating the frequency to calculating the average of each month.

Supplementary Table S42 shows the rankings of 50 countries and places from March 2020 to November 2020 by three-month moving average. This analysis includes indicators of health literacy and insomnia. We change the calculation method of the health-system policies indicator by calculating the three-month moving average of the indicator instead.

Supplementary Table S43 shows the rankings of 50 countries and territories from March 2020 to October 2020. We change the calculation method for lockdown efficiency, one-month cases per 100,000 members of the population and fatality rate. The identification of lockdown efficiency is changed as comparing the incidence with the stringency index for the last two weeks of the month. Indicators of one-month cases per 100,000 members of the population and fatality rate are changed as calculating the cumulative number of COVID-19 cases and the ratio of cumulative deaths to cumulative infections, respectively.

Supplementary Table S44 shows the rankings of 50 countries and places from March 2020 to October 2020. We alter the calculation method of both lockdown efficiency and fatality rate. The identification of lockdown efficiency is altered as comparing the incidence and the stringency index for the last two weeks of the month. Indicator of fatality rate is redefined as calculating the ratio of cumulative deaths to cumulative infections.

The results of including or excluding Google Trends indicators indicate that the overall rankings of certain countries and regions have slightly changed, but Taiwan and Korea in Asia and New Zealand in Oceania are still the leading countries and regions.

Supplementary Table S45 and Supplementary Table S46 list the alternative calculation methods for the ten indicators we mentioned in Supplementary Information 7. Supplementary Table S45 includes Google Trends indicators, that is, health literacy and insomnia indicators, while Supplementary Table S46 does not include Google Trends indicators. The lockdown efficiency is identified by comparing the average stringency index of the last two weeks of the month with the total incidence for the first two weeks of the month. The calculation method of health system policy indicators is to calculate the highest frequency in each month. The one-month cases per 100,000 members of the population is the number of COVID-19 cases per 100,000 members of a population in the past month. The fatality rate is the ratio of one-month cumulative deaths to one-month cumulative infections. Please refer to Table 1 for the definition of each indicator.

**Supplementary Table S34. List of 50 countries and territories included in the analysis**

| Country        | Start Date | End Date   | Remarks                                            |
|----------------|------------|------------|----------------------------------------------------|
| Argentina      | 31/03/2020 | 30/11/2020 | no unemployment rate data from October to November |
| Australia      | 31/03/2020 | 30/11/2020 |                                                    |
| Austria        | 31/03/2020 | 30/11/2020 |                                                    |
| Belgium        | 31/03/2020 | 30/11/2020 | no unemployment rate data for November             |
| Brazil         | 31/03/2020 | 30/11/2020 | no unemployment rate data for November             |
| Canada         | 31/03/2020 | 30/11/2020 |                                                    |
| Chile          | 31/03/2020 | 30/11/2020 |                                                    |
| China          | 31/03/2020 | 30/11/2020 | google trend data is not available                 |
| Colombia       | 31/03/2020 | 30/11/2020 |                                                    |
| Czech Republic | 31/03/2020 | 30/11/2020 |                                                    |
| Denmark        | 31/03/2020 | 30/11/2020 |                                                    |
| Egypt          | 31/03/2020 | 30/11/2020 | no unemployment rate data from October to November |
| Finland        | 31/03/2020 | 30/11/2020 |                                                    |
| France         | 31/03/2020 | 30/11/2020 | no unemployment rate data from October to November |
| Germany        | 31/03/2020 | 30/11/2020 |                                                    |
| Greece         | 31/03/2020 | 30/11/2020 | no unemployment rate data for November             |
| Hong Kong      | 31/03/2020 | 30/11/2020 |                                                    |
| Hungary        | 31/03/2020 | 30/11/2020 |                                                    |
| India          | 31/03/2020 | 30/11/2020 |                                                    |
| Indonesia      | 31/03/2020 | 30/11/2020 | no unemployment rate data from July to November    |
| Ireland        | 31/03/2020 | 30/11/2020 |                                                    |
| Israel         | 31/03/2020 | 30/11/2020 |                                                    |
| Italy          | 31/03/2020 | 30/11/2020 |                                                    |
| Japan          | 31/03/2020 | 30/11/2020 |                                                    |
| Malaysia       | 31/03/2020 | 30/11/2020 |                                                    |
| Mexico         | 31/03/2020 | 30/11/2020 |                                                    |
| Netherlands    | 31/03/2020 | 30/11/2020 |                                                    |
| New Zealand    | 31/03/2020 | 30/11/2020 | no unemployment rate data from October to November |
| Norway         | 31/03/2020 | 30/11/2020 | no unemployment rate data for November             |
| Pakistan       | 31/03/2020 | 30/11/2020 | no data                                            |
| Peru           | 31/03/2020 | 30/11/2020 |                                                    |
| Philippines    | 31/03/2020 | 30/11/2020 |                                                    |
| Poland         | 31/03/2020 | 30/11/2020 |                                                    |
| Portugal       | 31/03/2020 | 30/11/2020 | no unemployment rate data from October to November |
| Qatar          | 31/03/2020 | 30/11/2020 | no unemployment rate data from April to November   |
| Russia         | 31/03/2020 | 30/11/2020 |                                                    |
| Saudi Arabia   | 31/03/2020 | 30/11/2020 | no unemployment rate data from July to November    |
| Singapore      | 31/03/2020 | 30/11/2020 | no unemployment rate data from October to November |
| South Africa   | 31/03/2020 | 30/11/2020 | no unemployment rate data from October to November |
| Korea          | 31/03/2020 | 30/11/2020 |                                                    |
| Spain          | 31/03/2020 | 30/11/2020 | no unemployment rate data from October to November |
| Sweden         | 31/03/2020 | 30/11/2020 |                                                    |
| Switzerland    | 31/03/2020 | 30/11/2020 |                                                    |
| Taiwan         | 31/03/2020 | 30/11/2020 |                                                    |
| Thailand       | 31/03/2020 | 30/11/2020 | no unemployment rate data from April to June       |

|                      |            |            |                                                 |
|----------------------|------------|------------|-------------------------------------------------|
| Turkey               | 31/03/2020 | 30/11/2020 | no unemployment rate data for November          |
| United Arab Emirates | 31/03/2020 | 30/11/2020 | no data                                         |
| United Kingdom       | 31/03/2020 | 30/11/2020 | no unemployment rate data for November          |
| United States        | 31/03/2020 | 30/11/2020 |                                                 |
| Vietnam              | 31/03/2020 | 30/11/2020 | no unemployment rate data from July to November |

There are no data of the GDP annual growth rate from October to November in the 50 countries, so the indicator of GDP loss from October to November is not included in the analysis.

**Supplementary Table S35: Summary of sensitivity analysis for COVID-19 pandemic performance**

| Concern indicators      | Policy and hygiene education                                                              |                        |                 | Vital outcomes                                        |                           |                                                     |              |                       |          | Remarks                    |
|-------------------------|-------------------------------------------------------------------------------------------|------------------------|-----------------|-------------------------------------------------------|---------------------------|-----------------------------------------------------|--------------|-----------------------|----------|----------------------------|
|                         | Lockdown efficiency                                                                       | Health-system policies | Health literacy | One-month cases per 100,000 members of the population | Infection growth rate (%) | Fatality rate (%)                                   | GDP loss (%) | Unemployment rate (%) | Insomnia |                            |
| Supplementary Table S36 |                                                                                           | a monthly average      | excluded        |                                                       |                           |                                                     |              |                       | excluded |                            |
| Supplementary Table S37 |                                                                                           | a monthly average      | excluded        |                                                       |                           |                                                     |              |                       | excluded | three-month moving average |
| Supplementary Table S38 | The comparison between incidence and stringency index for the last two weeks of the month |                        | excluded        | cumulative number of COVID-19 cases                   |                           | ratio of cumulative deaths to cumulative infections |              |                       | excluded |                            |
| Supplementary Table S39 | The comparison between incidence and stringency index for the last two weeks of the month |                        | excluded        |                                                       |                           | ratio of cumulative deaths to cumulative infections |              |                       | excluded |                            |



|                         |                                                                                           |                   |          |                                     |  |                                                     |  |          |          |                            |
|-------------------------|-------------------------------------------------------------------------------------------|-------------------|----------|-------------------------------------|--|-----------------------------------------------------|--|----------|----------|----------------------------|
| Supplementary Table S40 | The comparison between incidence and stringency index for the last two weeks of the month |                   | excluded |                                     |  | ratio of cumulative deaths to cumulative infections |  | excluded | excluded |                            |
| Supplementary Table S41 |                                                                                           | a monthly average |          |                                     |  |                                                     |  |          |          |                            |
| Supplementary Table S42 |                                                                                           | a monthly average |          |                                     |  |                                                     |  |          |          | three-month moving average |
| Supplementary Table S43 | The comparison between incidence and stringency index for the last two weeks of the month |                   |          | cumulative number of COVID-19 cases |  | ratio of cumulative deaths to cumulative infections |  |          |          |                            |
| Supplementary Table S44 | The comparison between incidence and stringency index for the last two weeks of the month |                   |          |                                     |  | ratio of cumulative deaths to cumulative infections |  |          |          |                            |

**Supplementary Table S36. Rankings of 50 countries and territories March–November 2020, excluding indicators of health literacy and insomnia (one-way sensitivity analysis)**

| Rank | Mar          | Apr            | May            | Jun            | Jul         | Aug            | Sep          | Oct            | Nov         |
|------|--------------|----------------|----------------|----------------|-------------|----------------|--------------|----------------|-------------|
| 1    | Egypt        | Vietnam        | Vietnam        | Taiwan         | Taiwan      | Taiwan         | Taiwan       | Taiwan         | Taiwan      |
| 2    | Taiwan       | Taiwan         | Taiwan         | Korea          | Korea       | Korea          | Korea        | Thailand       | Thailand    |
| 3    | Vietnam      | Korea          | Australia      | Vietnam        | New Zealand | Turkey         | Italy        | China          | China       |
| 4    | Qatar        | Hong Kong      | China          | New Zealand    | China       | Thailand       | Singapore    | Korea          | Australia   |
| 5    | Japan        | Australia      | Korea          | China          | Ireland     | Ireland        | New Zealand  | Hong Kong      | Korea       |
| 6    | Norway       | China          | Hong Kong      | Australia      | Italy       | New Zealand    | China        | Japan          | Japan       |
| 7    | Turkey       | Israel         | Norway         | Finland        | Norway      | Italy          | Germany      | Norway         | Israel      |
| 8    | South Africa | New Zealand    | Greece         | Malaysia       | Malaysia    | Finland        | Thailand     | India          | India       |
| 9    | Korea        | Malaysia       | New Zealand    | Switzerland    | Thailand    | China          | Norway       | Finland        | Hong Kong   |
| 10   | Russia       | Japan          | Turkey         | Norway         | Finland     | Malaysia       | Japan        | Australia      | Finland     |
| 11   | Hong Kong    | Norway         | Japan          | Japan          | Netherlands | Norway         | Ireland      | Turkey         | Ireland     |
| 12   | Poland       | South Africa   | Switzerland    | Turkey         | Germany     | Poland         | Turkey       | Israel         | Malaysia    |
| 13   | Greece       | Finland        | Czech Republic | Greece         | Greece      | United Kingdom | Finland      | Denmark        | Denmark     |
| 14   | Mexico       | Greece         | Israel         | Denmark        | France      | Japan          | Malaysia     | Italy          | Mexico      |
| 15   | Thailand     | Indonesia      | Germany        | Italy          | Switzerland | Greece         | Poland       | Canada         | Peru        |
| 16   | Indonesia    | Turkey         | South Africa   | Czech Republic | Poland      | Switzerland    | Australia    | Mexico         | Germany     |
| 17   | Singapore    | Czech Republic | Austria        | Hong Kong      | Denmark     | Denmark        | South Africa | Netherlands    | Chile       |
| 18   | Saudi Arabia | Brazil         | Indonesia      | Hungary        | Turkey      | Singapore      | Hong Kong    | United Kingdom | Italy       |
| 19   | Colombia     | Portugal       | Singapore      | Ireland        | Japan       | Hong Kong      | Greece       | Malaysia       | Netherlands |

|    |                |              |              |                |                |                |                |                |                |
|----|----------------|--------------|--------------|----------------|----------------|----------------|----------------|----------------|----------------|
| 20 | Denmark        | Singapore    | Malaysia     | Israel         | Czech Republic | Austria        | Switzerland    | Ireland        | Austria        |
| 21 | Malaysia       | Ireland      | Russia       | France         | Hungary        | Germany        | France         | Brazil         | Philippines    |
| 22 | Australia      | Russia       | Ireland      | Austria        | Belgium        | Netherlands    | Portugal       | Austria        | Poland         |
| 23 | Hungary        | Saudi Arabia | Belgium      | Germany        | United Kingdom | France         | Israel         | Belgium        | Hungary        |
| 24 | Sweden         | Italy        | Poland       | Netherlands    | Sweden         | Hungary        | Netherlands    | Czech Republic | Colombia       |
| 25 | Israel         | Egypt        | Saudi Arabia | Portugal       | Portugal       | Portugal       | United Kingdom | Germany        | Czech Republic |
| 26 | Netherlands    | Hungary      | Egypt        | Spain          | Hong Kong      | Belgium        | India          | Peru           | Russia         |
| 27 | Brazil         | Poland       | France       | Russia         | India          | Sweden         | Denmark        | Philippines    | Switzerland    |
| 28 | Czech Republic | Belgium      | Hungary      | Saudi Arabia   | Singapore      | Canada         | Russia         | Switzerland    | United States  |
| 29 | Italy          | Philippines  | Denmark      | Singapore      | Russia         | Australia      | Belgium        | Sweden         | Sweden         |
| 30 | Chile          | Germany      | Brazil       | South Africa   | United States  | India          | United States  | Chile          | Canada         |
| 31 | China          | India        | Finland      | Belgium        | Israel         | South Africa   | Sweden         | Hungary        | Argentina      |
| 32 | New Zealand    | France       | Netherlands  | United Kingdom | Spain          | Russia         | Canada         | Colombia       | Belgium        |
| 33 | Argentina      | Denmark      | Spain        | Brazil         | Austria        | United States  | Mexico         | United States  | Brazil         |
| 34 | Finland        | Switzerland  | Italy        | Egypt          | Australia      | Czech Republic | Brazil         | Russia         | Egypt          |
| 35 | Peru           | Peru         | Philippines  | United States  | Canada         | Israel         | Austria        | Poland         | France         |
| 36 | France         | Chile        | Chile        | Indonesia      | South Africa   | Mexico         | Philippines    | Argentina      | Greece         |
| 37 | India          | Argentina    | Mexico       | Poland         | Brazil         | Brazil         | Peru           | Egypt          | Indonesia      |
| 38 | Belgium        | Colombia     | Portugal     | Canada         | Philippines    | Spain          | Czech Republic | France         | New Zealand    |
| 39 | Switzerland    | Austria      | India        | Mexico         | Argentina      | Philippines    | Hungary        | Greece         | Norway         |
| 40 | Philippines    | Netherlands  | Colombia     | India          | Mexico         | Argentina      | Chile          | Indonesia      | Pakistan       |
| 41 | Ireland        | Mexico       | Argentina    | Philippines    | Peru           | Chile          | Spain          | New Zealand    | Portugal       |
| 42 | Austria        | Spain        | Peru         | Argentina      | Chile          | Colombia       | Argentina      | Pakistan       | Qatar          |

|    |                      |                      |                      |                      |                      |                      |                      |                      |                      |
|----|----------------------|----------------------|----------------------|----------------------|----------------------|----------------------|----------------------|----------------------|----------------------|
| 43 | Spain                | Canada               | United States        | Chile                | Colombia             | Peru                 | Colombia             | Portugal             | Saudi Arabia         |
| 44 | Portugal             | United States        | United Kingdom       | Colombia             | Egypt                | Egypt                | Egypt                | Qatar                | Singapore            |
| 45 | Germany              | Sweden               | Sweden               | Sweden               | Indonesia            | Indonesia            | Indonesia            | Saudi Arabia         | South Africa         |
| 46 | United Kingdom       | United Kingdom       | Canada               | Peru                 | Pakistan             | Pakistan             | Pakistan             | Singapore            | Spain                |
| 47 | Canada               | Pakistan             | Pakistan             | Pakistan             | Qatar                | Qatar                | Qatar                | South Africa         | Turkey               |
| 48 | United States        | Qatar                | Qatar                | Qatar                | Saudi Arabia         | Saudi Arabia         | Saudi Arabia         | Spain                | United Arab Emirates |
| 49 | Pakistan             | Thailand             | Thailand             | Thailand             | United Arab Emirates | United Arab Emirates | United Arab Emirates | United Arab Emirates | United Kingdom       |
| 50 | United Arab Emirates | United Arab Emirates | United Arab Emirates | United Arab Emirates | Vietnam              | Vietnam              | Vietnam              | Vietnam              | Vietnam              |

Gray shading indicates the relevant data and indicators of the countries are not ranked due to incomplete information.

**Supplementary Table S37. Rankings of 50 countries and territories March–November 2020 by a three-month moving average, excluding indicators of health literacy and insomnia (two-way sensitivity analysis)**

| Rank | Mar          | Apr          | May            | Jun            | Jul            | Aug         | Sep         | Oct            | Nov         |
|------|--------------|--------------|----------------|----------------|----------------|-------------|-------------|----------------|-------------|
| 1    | Egypt        | Vietnam      | Vietnam        | Taiwan         | Taiwan         | Taiwan      | Taiwan      | Taiwan         | Taiwan      |
| 2    | Taiwan       | Taiwan       | Taiwan         | Vietnam        | Korea          | Korea       | Korea       | Korea          | Thailand    |
| 3    | Vietnam      | Korea        | Korea          | Korea          | China          | New Zealand | New Zealand | Thailand       | China       |
| 4    | Qatar        | Hong Kong    | Hong Kong      | China          | New Zealand    | China       | China       | China          | Korea       |
| 5    | Japan        | Japan        | Australia      | Australia      | Norway         | Finland     | Italy       | Norway         | Japan       |
| 6    | Norway       | Norway       | China          | New Zealand    | Greece         | Malaysia    | Thailand    | Italy          | Australia   |
| 7    | Turkey       | South Africa | Japan          | Hong Kong      | Malaysia       | Italy       | Ireland     | Japan          | Hong Kong   |
| 8    | South Africa | Australia    | Norway         | Norway         | Australia      | Norway      | Norway      | Turkey         | Finland     |
| 9    | Korea        | Egypt        | Turkey         | Japan          | Switzerland    | Ireland     | Finland     | Finland        | India       |
| 10   | Russia       | Israel       | Greece         | Malaysia       | Turkey         | Turkey      | Malaysia    | Hong Kong      | Israel      |
| 11   | Hong Kong    | Malaysia     | South Africa   | Greece         | Japan          | Greece      | Turkey      | Ireland        | Italy       |
| 12   | Poland       | Turkey       | New Zealand    | Israel         | Finland        | Switzerland | Germany     | Malaysia       | Ireland     |
| 13   | Greece       | China        | Israel         | Turkey         | Ireland        | Japan       | Poland      | Australia      | Malaysia    |
| 14   | Mexico       | Greece       | Malaysia       | Czech Republic | Germany        | Denmark     | Japan       | Germany        | Germany     |
| 15   | Thailand     | New Zealand  | Indonesia      | Finland        | Italy          | Netherlands | Greece      | United Kingdom | Denmark     |
| 16   | Indonesia    | Indonesia    | Egypt          | Switzerland    | Hong Kong      | Germany     | Singapore   | Poland         | Mexico      |
| 17   | Singapore    | Russia       | Czech Republic | South Africa   | Czech Republic | France      | Netherlands | Denmark        | Netherlands |
| 18   | Saudi Arabia | Singapore    | Russia         | Ireland        | Denmark        | Hungary     | Switzerland | Switzerland    | Poland      |
| 19   | Colombia     | Poland       | Singapore      | Germany        | Netherlands    | Australia   | France      | India          | Switzerland |

|    |                |                |              |               |                |                |                |                |                |
|----|----------------|----------------|--------------|---------------|----------------|----------------|----------------|----------------|----------------|
| 20 | Denmark        | Saudi Arabia   | Poland       | Singapore     | France         | Poland         | Denmark        | Netherlands    | Austria        |
| 21 | Malaysia       | Finland        | Saudi Arabia | Indonesia     | Hungary        | Hong Kong      | Hong Kong      | Israel         | Peru           |
| 22 | Australia      | Czech Republic | Finland      | Hungary       | Israel         | United Kingdom | United Kingdom | Canada         | Philippines    |
| 23 | Hungary        | Brazil         | Brazil       | Italy         | Belgium        | Czech Republic | Portugal       | Austria        | Canada         |
| 24 | Sweden         | Hungary        | Switzerland  | Denmark       | Singapore      | Portugal       | Belgium        | Belgium        | Russia         |
| 25 | Israel         | Denmark        | Hungary      | Russia        | Austria        | Singapore      | Australia      | Sweden         | Sweden         |
| 26 | Netherlands    | Italy          | Denmark      | Austria       | Poland         | Belgium        | Sweden         | Mexico         | Chile          |
| 27 | Brazil         | Mexico         | Ireland      | France        | Russia         | Austria        | Hungary        | Hungary        | Czech Republic |
| 28 | Czech Republic | Colombia       | Belgium      | Saudi Arabia  | South Africa   | Israel         | South Africa   | Brazil         | Hungary        |
| 29 | Italy          | Chile          | Germany      | Belgium       | Portugal       | Russia         | Austria        | Russia         | United States  |
| 30 | Chile          | Ireland        | Italy        | Brazil        | Spain          | Spain          | India          | United States  | Colombia       |
| 31 | China          | Belgium        | Mexico       | Portugal      | Brazil         | South Africa   | Czech Republic | Czech Republic | Argentina      |
| 32 | New Zealand    | Netherlands    | France       | Egypt         | United Kingdom | United States  | Israel         | Philippines    | Belgium        |
| 33 | Argentina      | Argentina      | Austria      | Poland        | India          | Canada         | Canada         | Chile          | Brazil         |
| 34 | Finland        | Peru           | Colombia     | Netherlands   | United States  | Sweden         | Russia         | Peru           | Egypt          |
| 35 | Peru           | India          | Netherlands  | Spain         | Philippines    | India          | United States  | Colombia       | France         |
| 36 | France         | France         | Chile        | Philippines   | Mexico         | Brazil         | Brazil         | Argentina      | Greece         |
| 37 | India          | Portugal       | Portugal     | India         | Sweden         | Mexico         | Mexico         | Egypt          | Indonesia      |
| 38 | Belgium        | Philippines    | India        | Chile         | Canada         | Philippines    | Spain          | France         | New Zealand    |
| 39 | Switzerland    | Switzerland    | Philippines  | Mexico        | Argentina      | Argentina      | Philippines    | Greece         | Norway         |
| 40 | Philippines    | Sweden         | Argentina    | Argentina     | Chile          | Chile          | Argentina      | Indonesia      | Pakistan       |
| 41 | Ireland        | Germany        | Peru         | Colombia      | Colombia       | Colombia       | Chile          | New Zealand    | Portugal       |
| 42 | Austria        | Austria        | Spain        | United States | Peru           | Peru           | Peru           | Pakistan       | Qatar          |

|    |                      |                      |                      |                      |                      |                      |                      |                      |                      |
|----|----------------------|----------------------|----------------------|----------------------|----------------------|----------------------|----------------------|----------------------|----------------------|
| 43 | Spain                | Spain                | Sweden               | Peru                 | Egypt                | Egypt                | Colombia             | Portugal             | Saudi Arabia         |
| 44 | Portugal             | Canada               | United Kingdom       | United Kingdom       | Indonesia            | Indonesia            | Egypt                | Qatar                | Singapore            |
| 45 | Germany              | United Kingdom       | United States        | Canada               | Pakistan             | Pakistan             | Indonesia            | Saudi Arabia         | South Africa         |
| 46 | United Kingdom       | United States        | Canada               | Sweden               | Qatar                | Qatar                | Pakistan             | Singapore            | Spain                |
| 47 | Canada               | Pakistan             | Pakistan             | Pakistan             | Saudi Arabia         | Saudi Arabia         | Qatar                | South Africa         | Turkey               |
| 48 | United States        | Qatar                | Qatar                | Qatar                | Thailand             | Thailand             | Saudi Arabia         | Spain                | United Arab Emirates |
| 49 | Pakistan             | Thailand             | Thailand             | Thailand             | United Arab Emirates | United Arab Emirates | United Arab Emirates | United Arab Emirates | United Kingdom       |
| 50 | United Arab Emirates | United Arab Emirates | United Arab Emirates | United Arab Emirates | Vietnam              | Vietnam              | Vietnam              | Vietnam              | Vietnam              |

Gray shading indicates the relevant data and indicators of the countries are not ranked due to incomplete information.

**Supplementary Table S38. Rankings of 50 countries and territories March–October 2020, excluding indicators of health literacy and insomnia (three-way sensitivity analysis)**

| Rank | Mar          | Apr            | May            | Jun          | Jul         | Aug       | Sep            | Oct            |
|------|--------------|----------------|----------------|--------------|-------------|-----------|----------------|----------------|
| 1    | Taiwan       | Taiwan         | Vietnam        | Taiwan       | Taiwan      | Taiwan    | Taiwan         | Taiwan         |
| 2    | Vietnam      | Vietnam        | Taiwan         | Korea        | Korea       | Turkey    | Korea          | Korea          |
| 3    | Egypt        | Korea          | Korea          | Vietnam      | Turkey      | Korea     | Malaysia       | Japan          |
| 4    | Qatar        | Australia      | Australia      | Australia    | Malaysia    | Malaysia  | Japan          | India          |
| 5    | Korea        | China          | New Zealand    | New Zealand  | Thailand    | Thailand  | China          | Hong Kong      |
| 6    | Mexico       | Israel         | Turkey         | Malaysia     | Norway      | China     | Hong Kong      | China          |
| 7    | Brazil       | Norway         | China          | Switzerland  | Italy       | Norway    | Norway         | Israel         |
| 8    | Japan        | Hong Kong      | Greece         | Japan        | China       | Hong Kong | India          | Australia      |
| 9    | Hong Kong    | Malaysia       | Hong Kong      | Norway       | Germany     | Italy     | Italy          | Austria        |
| 10   | Norway       | Japan          | Israel         | China        | Hong Kong   | Singapore | Singapore      | Finland        |
| 11   | Poland       | New Zealand    | Japan          | Finland      | Finland     | Finland   | Germany        | Denmark        |
| 12   | South Africa | Czech Republic | Czech Republic | Hong Kong    | Denmark     | Denmark   | Poland         | Netherlands    |
| 13   | Russia       | Austria        | Indonesia      | Turkey       | Netherlands | Poland    | Finland        | Czech Republic |
| 14   | Indonesia    | Russia         | Norway         | Greece       | Poland      | Japan     | Israel         | Poland         |
| 15   | Singapore    | Saudi Arabia   | Finland        | Israel       | Japan       | India     | Portugal       | Switzerland    |
| 16   | Greece       | South Africa   | Hungary        | Hungary      | Russia      | Germany   | Russia         | Hungary        |
| 17   | Denmark      | Turkey         | Switzerland    | Italy        | India       | Hungary   | Switzerland    | Mexico         |
| 18   | Thailand     | Greece         | Russia         | South Africa | Switzerland | Portugal  | United States  | United States  |
| 19   | Saudi Arabia | Indonesia      | Singapore      | Netherlands  | Hungary     | Russia    | Czech Republic | Germany        |



|    |                |               |                |                |                |                |                |              |
|----|----------------|---------------|----------------|----------------|----------------|----------------|----------------|--------------|
| 20 | Czech Republic | Finland       | South Africa   | Denmark        | Austria        | Switzerland    | Denmark        | Russia       |
| 21 | Argentina      | Ireland       | Malaysia       | Russia         | Portugal       | Sweden         | Mexico         | Colombia     |
| 22 | Australia      | Hungary       | Ireland        | Ireland        | Czech Republic | Czech Republic | France         | Canada       |
| 23 | Colombia       | Singapore     | Poland         | Austria        | United Kingdom | Philippines    | Austria        | Ireland      |
| 24 | Hungary        | Poland        | Germany        | France         | France         | Israel         | Philippines    | Peru         |
| 25 | Israel         | Germany       | Italy          | Saudi Arabia   | Singapore      | Netherlands    | Sweden         | Sweden       |
| 26 | Turkey         | Italy         | Saudi Arabia   | Singapore      | Israel         | France         | Netherlands    | Argentina    |
| 27 | Netherlands    | Portugal      | Austria        | Germany        | United States  | United Kingdom | United Kingdom | Belgium      |
| 28 | Sweden         | Brazil        | Belgium        | Czech Republic | Belgium        | United States  | Peru           | Brazil       |
| 29 | Malaysia       | Belgium       | France         | Indonesia      | Philippines    | Austria        | Chile          | Chile        |
| 30 | Italy          | France        | Brazil         | Poland         | Sweden         | Belgium        | Hungary        | Egypt        |
| 31 | New Zealand    | Switzerland   | Colombia       | Portugal       | Mexico         | Chile          | Belgium        | France       |
| 32 | Belgium        | Netherlands   | Mexico         | United Kingdom | Chile          | Mexico         | Colombia       | Greece       |
| 33 | Finland        | India         | Portugal       | Brazil         | Colombia       | Peru           | Spain          | Indonesia    |
| 34 | Peru           | Denmark       | Netherlands    | India          | Peru           | Colombia       | Argentina      | Italy        |
| 35 | Chile          | Argentina     | Denmark        | Belgium        | Spain          | Spain          | Australia      | Malaysia     |
| 36 | China          | Chile         | Argentina      | Spain          | Argentina      | Argentina      | Brazil         | New Zealand  |
| 37 | India          | Mexico        | Chile          | Colombia       | Australia      | Australia      | Canada         | Norway       |
| 38 | France         | Peru          | Spain          | United States  | Brazil         | Brazil         | Egypt          | Pakistan     |
| 39 | Switzerland    | Philippines   | India          | Argentina      | Canada         | Canada         | Greece         | Philippines  |
| 40 | Germany        | Spain         | Philippines    | Canada         | Egypt          | Egypt          | Indonesia      | Portugal     |
| 41 | Ireland        | Colombia      | United Kingdom | Mexico         | Greece         | Greece         | Ireland        | Qatar        |
| 42 | Spain          | United States | United States  | Chile          | Indonesia      | Indonesia      | New Zealand    | Saudi Arabia |

|    |                      |                      |                      |                      |                      |                      |                      |                      |
|----|----------------------|----------------------|----------------------|----------------------|----------------------|----------------------|----------------------|----------------------|
| 43 | Austria              | United Kingdom       | Peru                 | Peru                 | Ireland              | Ireland              | Pakistan             | Singapore            |
| 44 | Canada               | Canada               | Sweden               | Philippines          | New Zealand          | New Zealand          | Qatar                | South Africa         |
| 45 | Philippines          | Sweden               | Canada               | Sweden               | Pakistan             | Pakistan             | Saudi Arabia         | Spain                |
| 46 | Portugal             | Egypt                | Egypt                | Egypt                | Qatar                | Qatar                | South Africa         | Thailand             |
| 47 | United States        | Pakistan             | Pakistan             | Pakistan             | Saudi Arabia         | Saudi Arabia         | Thailand             | Turkey               |
| 48 | United Kingdom       | Qatar                | Qatar                | Qatar                | South Africa         | South Africa         | Turkey               | United Arab Emirates |
| 49 | Pakistan             | Thailand             | Thailand             | Thailand             | United Arab Emirates | United Arab Emirates | United Arab Emirates | United Kingdom       |
| 50 | United Arab Emirates | United Arab Emirates | United Arab Emirates | United Arab Emirates | Vietnam              | Vietnam              | Vietnam              | Vietnam              |

Gray shading indicates the relevant data and indicators of the countries are not ranked due to incomplete information.

**Supplementary Table S39. Rankings of 50 countries and territories March–October 2020, excluding indicators of health literacy and insomnia (two-way sensitivity analysis)**

| Rank | Mar          | Apr            | May            | Jun         | Jul            | Aug       | Sep           | Oct            |
|------|--------------|----------------|----------------|-------------|----------------|-----------|---------------|----------------|
| 1    | Taiwan       | Taiwan         | Vietnam        | Taiwan      | Taiwan         | Taiwan    | Taiwan        | Taiwan         |
| 2    | Vietnam      | Vietnam        | Taiwan         | Korea       | Korea          | Turkey    | Korea         | Korea          |
| 3    | Egypt        | Korea          | Korea          | Vietnam     | Italy          | Korea     | Malaysia      | Japan          |
| 4    | Korea        | Australia      | Australia      | Australia   | Turkey         | Malaysia  | Singapore     | India          |
| 5    | Qatar        | China          | New Zealand    | New Zealand | Norway         | Thailand  | Japan         | Hong Kong      |
| 6    | Mexico       | Norway         | Greece         | Switzerland | Malaysia       | China     | China         | China          |
| 7    | South Africa | Hong Kong      | Hong Kong      | Malaysia    | Thailand       | Norway    | Italy         | Israel         |
| 8    | Brazil       | Israel         | Turkey         | Japan       | China          | Italy     | Hong Kong     | Australia      |
| 9    | Japan        | Czech Republic | China          | Norway      | Germany        | Singapore | Norway        | Finland        |
| 10   | Hong Kong    | Malaysia       | Israel         | China       | Finland        | Finland   | Germany       | Austria        |
| 11   | Norway       | New Zealand    | Japan          | Finland     | Netherlands    | Hong Kong | Poland        | United States  |
| 12   | Poland       | Japan          | Czech Republic | Hong Kong   | Denmark        | Denmark   | India         | Czech Republic |
| 13   | Russia       | Austria        | Norway         | Hungary     | Poland         | Poland    | Finland       | Denmark        |
| 14   | Indonesia    | South Africa   | Switzerland    | Italy       | Hong Kong      | Japan     | Israel        | Mexico         |
| 15   | Singapore    | Turkey         | Germany        | Turkey      | Japan          | Germany   | Portugal      | Netherlands    |
| 16   | Greece       | Greece         | Indonesia      | Ireland     | Russia         | Sweden    | Russia        | Colombia       |
| 17   | Denmark      | Indonesia      | Malaysia       | Greece      | Switzerland    | Hungary   | Switzerland   | Russia         |
| 18   | Thailand     | Finland        | Finland        | Israel      | United Kingdom | Portugal  | United States | Switzerland    |
| 19   | Saudi Arabia | Ireland        | Hungary        | Netherlands | Hungary        | Russia    | Mexico        | Hungary        |

|    |                |               |                |                |                |                |                |              |
|----|----------------|---------------|----------------|----------------|----------------|----------------|----------------|--------------|
| 20 | Czech Republic | Hungary       | Italy          | Denmark        | France         | Switzerland    | Czech Republic | Canada       |
| 21 | Australia      | Russia        | Russia         | France         | India          | United Kingdom | Denmark        | Germany      |
| 22 | Colombia       | Saudi Arabia  | Singapore      | Russia         | Portugal       | India          | Philippines    | Peru         |
| 23 | Hungary        | Singapore     | Austria        | South Africa   | Singapore      | Czech Republic | Sweden         | Poland       |
| 24 | Israel         | Poland        | Ireland        | Austria        | Austria        | Israel         | France         | Ireland      |
| 25 | Turkey         | Switzerland   | Poland         | Germany        | Belgium        | Netherlands    | United Kingdom | Sweden       |
| 26 | Netherlands    | Germany       | Belgium        | Spain          | Sweden         | United States  | Austria        | Argentina    |
| 27 | Sweden         | Italy         | Saudi Arabia   | Saudi Arabia   | Czech Republic | Philippines    | Peru           | Belgium      |
| 28 | Malaysia       | Portugal      | South Africa   | Singapore      | Israel         | Chile          | Chile          | Brazil       |
| 29 | Italy          | Brazil        | France         | Belgium        | United States  | Mexico         | Netherlands    | Chile        |
| 30 | China          | Belgium       | Portugal       | Portugal       | Philippines    | France         | Belgium        | Egypt        |
| 31 | Argentina      | Netherlands   | Netherlands    | United Kingdom | Chile          | Austria        | Hungary        | France       |
| 32 | New Zealand    | India         | Denmark        | Brazil         | Mexico         | Belgium        | Colombia       | Greece       |
| 33 | Belgium        | Denmark       | Brazil         | Czech Republic | Peru           | Peru           | Spain          | Indonesia    |
| 34 | Finland        | France        | Mexico         | Indonesia      | Spain          | Colombia       | Argentina      | Italy        |
| 35 | Peru           | Chile         | Spain          | Poland         | Colombia       | Spain          | Australia      | Malaysia     |
| 36 | India          | Mexico        | Colombia       | India          | Argentina      | Argentina      | Brazil         | New Zealand  |
| 37 | France         | Peru          | Argentina      | United States  | Australia      | Australia      | Canada         | Norway       |
| 38 | Switzerland    | Philippines   | Chile          | Canada         | Brazil         | Brazil         | Egypt          | Pakistan     |
| 39 | Chile          | Argentina     | India          | Chile          | Canada         | Canada         | Greece         | Philippines  |
| 40 | Germany        | Spain         | Philippines    | Mexico         | Egypt          | Egypt          | Indonesia      | Portugal     |
| 41 | Ireland        | Colombia      | United Kingdom | Peru           | Greece         | Greece         | Ireland        | Qatar        |
| 42 | Spain          | United States | United States  | Colombia       | Indonesia      | Indonesia      | New Zealand    | Saudi Arabia |

|    |                      |                      |                      |                      |                      |                      |                      |                      |
|----|----------------------|----------------------|----------------------|----------------------|----------------------|----------------------|----------------------|----------------------|
| 43 | Austria              | United Kingdom       | Peru                 | Philippines          | Ireland              | Ireland              | Pakistan             | Singapore            |
| 44 | Canada               | Canada               | Sweden               | Argentina            | New Zealand          | New Zealand          | Qatar                | South Africa         |
| 45 | Philippines          | Sweden               | Canada               | Sweden               | Pakistan             | Pakistan             | Saudi Arabia         | Spain                |
| 46 | Portugal             | Egypt                | Egypt                | Egypt                | Qatar                | Qatar                | South Africa         | Thailand             |
| 47 | United States        | Pakistan             | Pakistan             | Pakistan             | Saudi Arabia         | Saudi Arabia         | Thailand             | Turkey               |
| 48 | United Kingdom       | Qatar                | Qatar                | Qatar                | South Africa         | South Africa         | Turkey               | United Arab Emirates |
| 49 | Pakistan             | Thailand             | Thailand             | Thailand             | United Arab Emirates | United Arab Emirates | United Arab Emirates | United Kingdom       |
| 50 | United Arab Emirates | United Arab Emirates | United Arab Emirates | United Arab Emirates | Vietnam              | Vietnam              | Vietnam              | Vietnam              |

Gray shading indicates the relevant data and indicators of the countries are not ranked due to incomplete information.

**Supplementary Table S40. Rankings of 50 countries and territories March–October 2020, excluding indicators of health literacy, insomnia, and unemployment rate (three-way sensitivity analysis)**

| <b>Rank</b> | <b>Mar</b>   | <b>Apr</b>     | <b>May</b>     | <b>Jun</b>  | <b>Jul</b>   | <b>Aug</b>   | <b>Sep</b>    | <b>Oct</b>   |
|-------------|--------------|----------------|----------------|-------------|--------------|--------------|---------------|--------------|
| 1           | Taiwan       | Taiwan         | Vietnam        | Taiwan      | Taiwan       | Taiwan       | Taiwan        | Saudi Arabia |
| 2           | Vietnam      | Vietnam        | Taiwan         | Vietnam     | Norway       | Malaysia     | Korea         | Singapore    |
| 3           | Korea        | Korea          | Australia      | Australia   | Malaysia     | Saudi Arabia | Saudi Arabia  | Taiwan       |
| 4           | South Africa | Australia      | Korea          | Korea       | Korea        | Turkey       | Singapore     | Thailand     |
| 5           | Qatar        | Hong Kong      | Hong Kong      | Malaysia    | Thailand     | Korea        | Hong Kong     | Pakistan     |
| 6           | Hong Kong    | China          | Norway         | Thailand    | Italy        | Thailand     | Thailand      | Hong Kong    |
| 7           | Egypt        | Thailand       | Switzerland    | Switzerland | Turkey       | Norway       | Malaysia      | Qatar        |
| 8           | Japan        | Norway         | New Zealand    | Hong Kong   | Germany      | Hong Kong    | Norway        | Korea        |
| 9           | Mexico       | Malaysia       | China          | New Zealand | Finland      | Singapore    | Vietnam       | New Zealand  |
| 10          | Norway       | Czech Republic | Israel         | Norway      | China        | Finland      | Turkey        | South Africa |
| 11          | Russia       | Austria        | Japan          | Finland     | Hong Kong    | China        | Japan         | Japan        |
| 12          | Singapore    | Israel         | Czech Republic | Japan       | Vietnam      | Vietnam      | China         | Norway       |
| 13          | Brazil       | Japan          | Germany        | China       | Denmark      | Italy        | Germany       | Vietnam      |
| 14          | Colombia     | Indonesia      | Greece         | Qatar       | Netherlands  | Denmark      | Italy         | India        |
| 15          | Denmark      | Saudi Arabia   | Indonesia      | Denmark     | Saudi Arabia | Poland       | Poland        | Israel       |
| 16          | Indonesia    | New Zealand    | Turkey         | Hungary     | Poland       | Germany      | Finland       | Australia    |
| 17          | Thailand     | Qatar          | Austria        | Turkey      | Russia       | Russia       | India         | China        |
| 18          | Malaysia     | Russia         | Malaysia       | Austria     | Hungary      | Sweden       | Portugal      | Egypt        |
| 19          | Poland       | Switzerland    | Thailand       | Israel      | Japan        | Portugal     | United States | Philippines  |

|    |                |               |               |                |                |                |                |                         |
|----|----------------|---------------|---------------|----------------|----------------|----------------|----------------|-------------------------|
| 20 | Saudi Arabia   | Germany       | Finland       | Netherlands    | Austria        | Japan          | Russia         | Brazil                  |
| 21 | China          | India         | Qatar         | Italy          | Portugal       | Hungary        | Israel         | Malaysia                |
| 22 | Czech Republic | Hungary       | Russia        | Russia         | Switzerland    | United States  | Philippines    | Turkey                  |
| 23 | Australia      | South Africa  | Saudi Arabia  | Saudi Arabia   | Sweden         | Philippines    | Switzerland    | United States           |
| 24 | Hungary        | Singapore     | Hungary       | Ireland        | France         | Switzerland    | Sweden         | Finland                 |
| 25 | Greece         | Poland        | Singapore     | Germany        | United States  | Chile          | Peru           | Indonesia               |
| 26 | Argentina      | Turkey        | Poland        | Greece         | United Kingdom | Indonesia      | Chile          | Colombia                |
| 27 | India          | Greece        | Italy         | Spain          | India          | United Kingdom | Indonesia      | Austria                 |
| 28 | New Zealand    | Chile         | Ireland       | France         | Singapore      | Austria        | Mexico         | Portugal                |
| 29 | Finland        | Finland       | Belgium       | Singapore      | Philippines    | Czech Republic | Austria        | United Arab<br>Emirates |
| 30 | Switzerland    | Ireland       | Denmark       | South Africa   | Chile          | Israel         | Czech Republic | Czech Republic          |
| 31 | Chile          | Denmark       | Colombia      | United States  | Czech Republic | Mexico         | Denmark        | Chile                   |
| 32 | Israel         | Philippines   | South Africa  | Canada         | Indonesia      | Netherlands    | United Kingdom | Mexico                  |
| 33 | Turkey         | Argentina     | Argentina     | Indonesia      | Israel         | India          | Colombia       | Greece                  |
| 34 | Germany        | Mexico        | Chile         | Brazil         | Belgium        | Peru           | Netherlands    | Canada                  |
| 35 | Netherlands    | Peru          | France        | India          | Peru           | Colombia       | France         | Argentina               |
| 36 | Sweden         | Netherlands   | Spain         | Belgium        | Mexico         | France         | Spain          | Denmark                 |
| 37 | Austria        | Colombia      | India         | Chile          | Spain          | Belgium        | Hungary        | Peru                    |
| 38 | Canada         | Italy         | Brazil        | Czech Republic | Colombia       | Spain          | Belgium        | Russia                  |
| 39 | Italy          | Portugal      | Philippines   | Peru           | Argentina      | Argentina      | Argentina      | Ireland                 |
| 40 | Belgium        | Brazil        | United States | Poland         | Australia      | Australia      | Australia      | Spain                   |
| 41 | Ireland        | United States | Mexico        | Portugal       | Brazil         | Brazil         | Brazil         | Germany                 |

|    |                      |                      |                      |                      |                      |                      |                      |                |
|----|----------------------|----------------------|----------------------|----------------------|----------------------|----------------------|----------------------|----------------|
| 42 | Peru                 | Belgium              | Peru                 | United Kingdom       | Canada               | Canada               | Canada               | Italy          |
| 43 | United States        | Spain                | Portugal             | Colombia             | Egypt                | Egypt                | Egypt                | Switzerland    |
| 44 | Philippines          | Canada               | Netherlands          | Philippines          | Greece               | Greece               | Greece               | Netherlands    |
| 45 | France               | France               | Sweden               | Argentina            | Ireland              | Ireland              | Ireland              | Poland         |
| 46 | Spain                | Sweden               | Canada               | Mexico               | New Zealand          | New Zealand          | New Zealand          | Hungary        |
| 47 | Portugal             | United Kingdom       | United Kingdom       | Sweden               | Pakistan             | Pakistan             | Pakistan             | France         |
| 48 | United Kingdom       | Egypt                | Egypt                | Egypt                | Qatar                | Qatar                | Qatar                | United Kingdom |
| 49 | Pakistan             | Pakistan             | Pakistan             | Pakistan             | South Africa         | South Africa         | South Africa         | Belgium        |
| 50 | United Arab Emirates | United Arab Emirates | United Arab Emirates | United Arab Emirates | United Arab Emirates | United Arab Emirates | United Arab Emirates | Sweden         |

Gray shading indicates the relevant data and indicators of the countries are not ranked due to incomplete information.



**Supplementary Table S41. Rankings of 50 countries and territories March–November 2020 (two-way sensitivity analysis)**

| <b>Rank</b> | <b>Mar</b>   | <b>Apr</b>     | <b>May</b>     | <b>Jun</b>     | <b>Jul</b>     | <b>Aug</b>     | <b>Sep</b>   | <b>Oct</b>     | <b>Nov</b>  |
|-------------|--------------|----------------|----------------|----------------|----------------|----------------|--------------|----------------|-------------|
| 1           | Taiwan       | Taiwan         | Taiwan         | Taiwan         | Taiwan         | Taiwan         | Taiwan       | Taiwan         | Taiwan      |
| 2           | Egypt        | Korea          | Vietnam        | Korea          | New Zealand    | Korea          | Italy        | Thailand       | Korea       |
| 3           | Russia       | Vietnam        | Korea          | Vietnam        | Korea          | Finland        | Korea        | Korea          | Japan       |
| 4           | Qatar        | Japan          | Australia      | New Zealand    | Italy          | Malaysia       | Singapore    | Japan          | India       |
| 5           | Poland       | New Zealand    | New Zealand    | Japan          | Malaysia       | New Zealand    | New Zealand  | Hong Kong      | Thailand    |
| 6           | Korea        | Australia      | Switzerland    | Finland        | Netherlands    | Turkey         | Japan        | India          | Australia   |
| 7           | Japan        | Finland        | Germany        | Australia      | Thailand       | Italy          | Germany      | Finland        | Hong Kong   |
| 8           | Vietnam      | Hong Kong      | Hong Kong      | Malaysia       | Finland        | Denmark        | Thailand     | Netherlands    | Finland     |
| 9           | Thailand     | Portugal       | Japan          | Italy          | Germany        | Thailand       | Malaysia     | Denmark        | Mexico      |
| 10          | South Africa | Malaysia       | Czech Republic | Turkey         | Switzerland    | Japan          | Turkey       | Italy          | Malaysia    |
| 11          | Indonesia    | Russia         | Russia         | Denmark        | France         | Poland         | Finland      | Turkey         | Denmark     |
| 12          | Turkey       | Indonesia      | South Africa   | Switzerland    | Japan          | United Kingdom | Poland       | Canada         | Germany     |
| 13          | Colombia     | Czech Republic | Austria        | Hong Kong      | Denmark        | Switzerland    | South Africa | United Kingdom | Italy       |
| 14          | Mexico       | South Africa   | France         | Czech Republic | Turkey         | Germany        | Australia    | Mexico         | Netherlands |
| 15          | Sweden       | Saudi Arabia   | Turkey         | France         | Poland         | France         | Portugal     | Australia      | Austria     |
| 16          | Italy        | Turkey         | Poland         | Netherlands    | United Kingdom | Netherlands    | Switzerland  | Malaysia       | Peru        |
| 17          | Saudi Arabia | Poland         | Netherlands    | Hungary        | Czech Republic | Canada         | Netherlands  | Germany        | Chile       |
| 18          | Hungary      | Singapore      | Egypt          | Germany        | India          | Australia      | Hong Kong    | Sweden         | Russia      |
| 19          | Denmark      | Denmark        | Portugal       | Russia         | Singapore      | Austria        | France       | Brazil         | Colombia    |
| 20          | Australia    | Germany        | Finland        | South Africa   | Hungary        | Sweden         | India        | Austria        | Poland      |

|    |                |                |                |                |               |                |                |                |                |
|----|----------------|----------------|----------------|----------------|---------------|----------------|----------------|----------------|----------------|
| 21 | Brazil         | India          | Brazil         | Portugal       | Sweden        | Portugal       | United Kingdom | Peru           | Sweden         |
| 22 | Czech Republic | Egypt          | Saudi Arabia   | Saudi Arabia   | Portugal      | Singapore      | Canada         | Switzerland    | Hungary        |
| 23 | Finland        | Brazil         | Singapore      | Singapore      | Russia        | Hungary        | Russia         | Russia         | Switzerland    |
| 24 | Hong Kong      | Hungary        | Malaysia       | Spain          | Hong Kong     | India          | Denmark        | Hungary        | Czech Republic |
| 25 | Malaysia       | France         | Hungary        | Austria        | Australia     | Hong Kong      | Brazil         | Czech Republic | Canada         |
| 26 | France         | Argentina      | Denmark        | United Kingdom | Canada        | Russia         | Austria        | Poland         | United States  |
| 27 | New Zealand    | Switzerland    | Indonesia      | United States  | United States | South Africa   | Sweden         | Chile          | China          |
| 28 | Argentina      | Italy          | India          | Egypt          | Spain         | Brazil         | Mexico         | Colombia       | Israel         |
| 29 | Singapore      | Austria        | Italy          | Canada         | Brazil        | Czech Republic | Peru           | United States  | Ireland        |
| 30 | Netherlands    | Netherlands    | Chile          | Brazil         | South Africa  | Mexico         | United States  | China          | Philippines    |
| 31 | Peru           | Canada         | Colombia       | Poland         | Austria       | United States  | Czech Republic | Norway         | Argentina      |
| 32 | Chile          | Peru           | Argentina      | India          | Colombia      | Spain          | Hungary        | Israel         | Belgium        |
| 33 | Switzerland    | Chile          | Mexico         | Colombia       | Argentina     | Chile          | Chile          | Ireland        | Brazil         |
| 34 | Spain          | Colombia       | Peru           | Indonesia      | Peru          | Argentina      | Spain          | Belgium        | Egypt          |
| 35 | Canada         | Sweden         | Sweden         | Mexico         | Chile         | Peru           | Colombia       | Philippines    | France         |
| 36 | India          | Mexico         | Spain          | Sweden         | Mexico        | Colombia       | Argentina      | Argentina      | Greece         |
| 37 | Austria        | United States  | United Kingdom | Peru           | China         | China          | China          | Egypt          | Indonesia      |
| 38 | United Kingdom | United Kingdom | Canada         | Argentina      | Belgium       | Belgium        | Norway         | France         | New Zealand    |
| 39 | Germany        | Spain          | United States  | Chile          | Egypt         | Egypt          | Ireland        | Greece         | Norway         |
| 40 | Portugal       | China          | China          | China          | Greece        | Greece         | Greece         | Indonesia      | Pakistan       |
| 41 | United States  | Israel         | Norway         | Norway         | Indonesia     | Indonesia      | Israel         | New Zealand    | Portugal       |
| 42 | China          | Norway         | Greece         | Greece         | Ireland       | Ireland        | Belgium        | Pakistan       | Qatar          |
| 43 | Norway         | Greece         | Israel         | Ireland        | Israel        | Israel         | Philippines    | Portugal       | Saudi Arabia   |

|    |                      |                      |                      |                      |                      |                      |                      |                      |                      |
|----|----------------------|----------------------|----------------------|----------------------|----------------------|----------------------|----------------------|----------------------|----------------------|
| 44 | Greece               | Ireland              | Ireland              | Israel               | Norway               | Norway               | Egypt                | Qatar                | Singapore            |
| 45 | Israel               | Belgium              | Belgium              | Belgium              | Pakistan             | Pakistan             | Indonesia            | Saudi Arabia         | South Africa         |
| 46 | Belgium              | Philippines          | Philippines          | Philippines          | Philippines          | Philippines          | Pakistan             | Singapore            | Spain                |
| 47 | Philippines          | Pakistan             | Pakistan             | Pakistan             | Qatar                | Qatar                | Qatar                | South Africa         | Turkey               |
| 48 | Ireland              | Qatar                | Qatar                | Qatar                | Saudi Arabia         | Saudi Arabia         | Saudi Arabia         | Spain                | United Arab Emirates |
| 49 | Pakistan             | Thailand             | Thailand             | Thailand             | United Arab Emirates | United Arab Emirates | United Arab Emirates | United Arab Emirates | United Kingdom       |
| 50 | United Arab Emirates | United Arab Emirates | United Arab Emirates | United Arab Emirates | Vietnam              | Vietnam              | Vietnam              | Vietnam              | Vietnam              |

Gray shading indicates the relevant data and indicators of the countries are not ranked due to incomplete information.

**Supplementary Table S42. Rankings of 50 countries and territories March–November 2020 by a three-month moving average (three-way sensitivity analysis)**

| Rank | Mar          | Apr            | May            | Jun            | Jul            | Aug            | Sep            | Oct            | Nov         |
|------|--------------|----------------|----------------|----------------|----------------|----------------|----------------|----------------|-------------|
| 1    | Taiwan       | Taiwan         | Taiwan         | Taiwan         | Taiwan         | Taiwan         | Taiwan         | Taiwan         | Taiwan      |
| 2    | Egypt        | Korea          | Korea          | Korea          | Korea          | Korea          | Korea          | Korea          | Korea       |
| 3    | Russia       | Vietnam        | Vietnam        | Vietnam        | New Zealand    | New Zealand    | New Zealand    | Italy          | Japan       |
| 4    | Qatar        | Japan          | Japan          | New Zealand    | Japan          | Malaysia       | Italy          | Thailand       | Thailand    |
| 5    | Poland       | Russia         | Australia      | Japan          | Switzerland    | Finland        | Malaysia       | Finland        | India       |
| 6    | Korea        | Egypt          | New Zealand    | Australia      | Finland        | Italy          | Finland        | Japan          | Italy       |
| 7    | Japan        | Australia      | Russia         | Finland        | Malaysia       | Japan          | Thailand       | Turkey         | Finland     |
| 8    | Vietnam      | Indonesia      | South Africa   | Hong Kong      | Italy          | Turkey         | Japan          | Malaysia       | Hong Kong   |
| 9    | Thailand     | Poland         | Hong Kong      | Malaysia       | Germany        | Denmark        | Turkey         | Germany        | Australia   |
| 10   | South Africa | South Africa   | Egypt          | Turkey         | Netherlands    | Netherlands    | Germany        | Denmark        | Germany     |
| 11   | Indonesia    | New Zealand    | Poland         | Czech Republic | Australia      | Switzerland    | Netherlands    | Hong Kong      | Malaysia    |
| 12   | Turkey       | Finland        | Turkey         | Russia         | Turkey         | Germany        | Poland         | India          | Netherlands |
| 13   | Colombia     | Turkey         | Czech Republic | Switzerland    | France         | France         | Switzerland    | Netherlands    | Denmark     |
| 14   | Mexico       | Hong Kong      | Indonesia      | Germany        | Czech Republic | United Kingdom | Singapore      | United Kingdom | Mexico      |
| 15   | Sweden       | Saudi Arabia   | Finland        | South Africa   | Denmark        | Australia      | Denmark        | Poland         | Poland      |
| 16   | Italy        | Malaysia       | Saudi Arabia   | Portugal       | Hong Kong      | Poland         | France         | Australia      | Russia      |
| 17   | Saudi Arabia | Czech Republic | Malaysia       | Denmark        | Russia         | Hungary        | United Kingdom | Canada         | Canada      |
| 18   | Hungary      | Denmark        | Switzerland    | France         | Portugal       | Portugal       | Portugal       | Switzerland    | Austria     |
| 19   | Denmark      | Hungary        | Germany        | Saudi Arabia   | Hungary        | Singapore      | India          | Russia         | Switzerland |
| 20   | Australia    | Italy          | France         | Italy          | Singapore      | Czech Republic | Australia      | Austria        | Peru        |

|    |                |                |                |                |                |               |                |                |                |
|----|----------------|----------------|----------------|----------------|----------------|---------------|----------------|----------------|----------------|
| 21 | Brazil         | Brazil         | Brazil         | Austria        | South Africa   | Hong Kong     | Hong Kong      | Sweden         | Sweden         |
| 22 | Czech Republic | Singapore      | Denmark        | Singapore      | Poland         | Russia        | Canada         | Mexico         | Chile          |
| 23 | Finland        | Portugal       | Hungary        | Netherlands    | Austria        | Austria       | Sweden         | Brazil         | Hungary        |
| 24 | Hong Kong      | Colombia       | Portugal       | Hungary        | United Kingdom | Canada        | Russia         | Hungary        | Czech Republic |
| 25 | Malaysia       | France         | Singapore      | Poland         | India          | South Africa  | South Africa   | Czech Republic | Colombia       |
| 26 | France         | Sweden         | Italy          | Egypt          | Brazil         | India         | Hungary        | Peru           | United States  |
| 27 | New Zealand    | Argentina      | Netherlands    | Brazil         | Spain          | Sweden        | Austria        | United States  | China          |
| 28 | Argentina      | Mexico         | Austria        | Indonesia      | United States  | Spain         | Czech Republic | Chile          | Argentina      |
| 29 | Singapore      | Netherlands    | Colombia       | India          | Canada         | United States | Brazil         | Colombia       | Belgium        |
| 30 | Netherlands    | India          | India          | Canada         | Sweden         | Brazil        | United States  | China          | Brazil         |
| 31 | Peru           | Switzerland    | Argentina      | Colombia       | Colombia       | Mexico        | Spain          | Argentina      | Egypt          |
| 32 | Chile          | Peru           | Sweden         | United Kingdom | Chile          | Colombia      | Mexico         | Belgium        | France         |
| 33 | Switzerland    | Germany        | Chile          | Spain          | Peru           | Peru          | Peru           | Egypt          | Greece         |
| 34 | Spain          | Canada         | Mexico         | United States  | Argentina      | Argentina     | Chile          | France         | Indonesia      |
| 35 | Canada         | Chile          | Peru           | Chile          | Mexico         | Chile         | Argentina      | Greece         | Ireland        |
| 36 | India          | Austria        | Canada         | Argentina      | China          | China         | Colombia       | Indonesia      | Israel         |
| 37 | Austria        | Spain          | Spain          | Peru           | Belgium        | Belgium       | China          | Ireland        | New Zealand    |
| 38 | United Kingdom | United Kingdom | United Kingdom | Sweden         | Egypt          | Egypt         | Belgium        | Israel         | Norway         |
| 39 | Germany        | United States  | United States  | Mexico         | Greece         | Greece        | Egypt          | New Zealand    | Pakistan       |
| 40 | Portugal       | China          | China          | China          | Indonesia      | Indonesia     | Greece         | Norway         | Philippines    |
| 41 | United States  | Belgium        | Belgium        | Belgium        | Ireland        | Ireland       | Indonesia      | Pakistan       | Portugal       |
| 42 | China          | Greece         | Greece         | Greece         | Israel         | Israel        | Ireland        | Philippines    | Qatar          |
| 43 | Belgium        | Ireland        | Ireland        | Ireland        | Norway         | Norway        | Israel         | Portugal       | Saudi Arabia   |

|    |                      |                      |                      |                      |                      |                      |                      |                      |                      |
|----|----------------------|----------------------|----------------------|----------------------|----------------------|----------------------|----------------------|----------------------|----------------------|
| 44 | Greece               | Israel               | Israel               | Israel               | Pakistan             | Pakistan             | Norway               | Qatar                | Singapore            |
| 45 | Ireland              | Norway               | Norway               | Norway               | Philippines          | Philippines          | Pakistan             | Saudi Arabia         | South Africa         |
| 46 | Israel               | Pakistan             | Pakistan             | Pakistan             | Qatar                | Qatar                | Philippines          | Singapore            | Spain                |
| 47 | Norway               | Philippines          | Philippines          | Philippines          | Saudi Arabia         | Saudi Arabia         | Qatar                | South Africa         | Turkey               |
| 48 | Pakistan             | Qatar                | Qatar                | Qatar                | Thailand             | Thailand             | Saudi Arabia         | Spain                | United Arab Emirates |
| 49 | Philippines          | Thailand             | Thailand             | Thailand             | United Arab Emirates | United Arab Emirates | United Arab Emirates | United Arab Emirates | United Kingdom       |
| 50 | United Arab Emirates | United Arab Emirates | United Arab Emirates | United Arab Emirates | Vietnam              | Vietnam              | Vietnam              | Vietnam              | Vietnam              |

Gray shading indicates the relevant data and indicators of the countries are not ranked due to incomplete information.

**Supplementary Table S43. Rankings of 50 countries and territories March–October 2020 (four-way sensitivity analysis)**

| <b>Rank</b> | <b>Mar</b>     | <b>Apr</b>     | <b>May</b>     | <b>Jun</b>   | <b>Jul</b>     | <b>Aug</b>     | <b>Sep</b>     | <b>Oct</b>     |
|-------------|----------------|----------------|----------------|--------------|----------------|----------------|----------------|----------------|
| 1           | Taiwan         | Taiwan         | Taiwan         | Taiwan       | Taiwan         | Taiwan         | Taiwan         | Taiwan         |
| 2           | Egypt          | Korea          | Vietnam        | Korea        | Turkey         | Malaysia       | Korea          | Korea          |
| 3           | Korea          | Japan          | Korea          | Vietnam      | Malaysia       | Korea          | Japan          | India          |
| 4           | Poland         | Vietnam        | New Zealand    | Japan        | Korea          | Turkey         | Malaysia       | Japan          |
| 5           | Vietnam        | Australia      | Australia      | New Zealand  | Thailand       | Finland        | Italy          | Hong Kong      |
| 6           | Brazil         | New Zealand    | Czech Republic | Australia    | Italy          | Denmark        | India          | Netherlands    |
| 7           | Qatar          | Russia         | Finland        | Malaysia     | Netherlands    | Thailand       | Singapore      | Denmark        |
| 8           | Russia         | Czech Republic | Japan          | Finland      | Japan          | Italy          | Germany        | Finland        |
| 9           | Indonesia      | Saudi Arabia   | Russia         | Italy        | Germany        | Japan          | Hong Kong      | Austria        |
| 10          | Japan          | Austria        | Switzerland    | South Africa | Hong Kong      | Poland         | Poland         | Australia      |
| 11          | Mexico         | Finland        | Germany        | Turkey       | India          | India          | Portugal       | Poland         |
| 12          | South Africa   | Malaysia       | Hong Kong      | Switzerland  | Denmark        | Singapore      | Finland        | Russia         |
| 13          | Thailand       | Hong Kong      | Turkey         | Hong Kong    | Russia         | Germany        | Russia         | Switzerland    |
| 14          | Italy          | Poland         | Hungary        | Netherlands  | Finland        | Hong Kong      | Switzerland    | Mexico         |
| 15          | Sweden         | Portugal       | Poland         | Russia       | Poland         | Russia         | Denmark        | Germany        |
| 16          | Colombia       | Germany        | South Africa   | Denmark      | Switzerland    | Switzerland    | Netherlands    | Hungary        |
| 17          | Hungary        | Indonesia      | France         | Hungary      | Singapore      | Sweden         | France         | Canada         |
| 18          | Denmark        | Turkey         | Italy          | Saudi Arabia | United Kingdom | Portugal       | Czech Republic | Czech Republic |
| 19          | Czech Republic | Singapore      | Saudi Arabia   | Singapore    | Portugal       | Czech Republic | Austria        | Peru           |
| 20          | Australia      | Hungary        | Austria        | France       | Austria        | Hungary        | United Kingdom | Colombia       |

|    |                |                |                |                |                |                |               |               |
|----|----------------|----------------|----------------|----------------|----------------|----------------|---------------|---------------|
| 21 | Saudi Arabia   | South Africa   | Indonesia      | United Kingdom | Hungary        | France         | Mexico        | Sweden        |
| 22 | Argentina      | Denmark        | Portugal       | Austria        | France         | Netherlands    | United States | United States |
| 23 | Finland        | Netherlands    | Singapore      | Germany        | Czech Republic | United Kingdom | Peru          | China         |
| 24 | Hong Kong      | India          | Netherlands    | Portugal       | Sweden         | Chile          | Sweden        | Argentina     |
| 25 | Turkey         | France         | Malaysia       | Colombia       | United States  | Mexico         | Chile         | Belgium       |
| 26 | New Zealand    | Switzerland    | Brazil         | India          | Colombia       | Austria        | Hungary       | Brazil        |
| 27 | Singapore      | Argentina      | Colombia       | Poland         | Peru           | United States  | Colombia      | Chile         |
| 28 | France         | Italy          | India          | United States  | Chile          | Peru           | Spain         | Egypt         |
| 29 | Netherlands    | Canada         | Chile          | Canada         | Mexico         | Colombia       | China         | France        |
| 30 | Malaysia       | Peru           | Denmark        | Czech Republic | Spain          | Spain          | Argentina     | Greece        |
| 31 | Canada         | Brazil         | Argentina      | Spain          | China          | China          | Australia     | Indonesia     |
| 32 | Peru           | Mexico         | United Kingdom | Brazil         | Argentina      | Argentina      | Belgium       | Ireland       |
| 33 | Spain          | Chile          | Mexico         | Indonesia      | Australia      | Australia      | Brazil        | Israel        |
| 34 | Switzerland    | United Kingdom | Peru           | Peru           | Belgium        | Belgium        | Canada        | Italy         |
| 35 | Chile          | United States  | Sweden         | Mexico         | Brazil         | Brazil         | Egypt         | Malaysia      |
| 36 | Germany        | Sweden         | United States  | Argentina      | Canada         | Canada         | Greece        | New Zealand   |
| 37 | India          | Colombia       | Canada         | Chile          | Egypt          | Egypt          | Indonesia     | Norway        |
| 38 | Austria        | Spain          | Spain          | Sweden         | Greece         | Greece         | Ireland       | Pakistan      |
| 39 | United States  | China          | China          | China          | Indonesia      | Indonesia      | Israel        | Philippines   |
| 40 | Portugal       | Belgium        | Belgium        | Belgium        | Ireland        | Ireland        | New Zealand   | Portugal      |
| 41 | United Kingdom | Egypt          | Egypt          | Egypt          | Israel         | Israel         | Norway        | Qatar         |
| 42 | China          | Greece         | Greece         | Greece         | New Zealand    | New Zealand    | Pakistan      | Saudi Arabia  |
| 43 | Belgium        | Ireland        | Ireland        | Ireland        | Norway         | Norway         | Philippines   | Singapore     |



|    |                      |                      |                      |                      |                      |                      |                      |                      |
|----|----------------------|----------------------|----------------------|----------------------|----------------------|----------------------|----------------------|----------------------|
| 44 | Greece               | Israel               | Israel               | Israel               | Pakistan             | Pakistan             | Qatar                | South Africa         |
| 45 | Ireland              | Norway               | Norway               | Norway               | Philippines          | Philippines          | Saudi Arabia         | Spain                |
| 46 | Israel               | Pakistan             | Pakistan             | Pakistan             | Qatar                | Qatar                | South Africa         | Thailand             |
| 47 | Norway               | Philippines          | Philippines          | Philippines          | Saudi Arabia         | Saudi Arabia         | Thailand             | Turkey               |
| 48 | Pakistan             | Qatar                | Qatar                | Qatar                | South Africa         | South Africa         | Turkey               | United Arab Emirates |
| 49 | Philippines          | Thailand             | Thailand             | Thailand             | United Arab Emirates | United Arab Emirates | United Arab Emirates | United Kingdom       |
| 50 | United Arab Emirates | United Arab Emirates | United Arab Emirates | United Arab Emirates | Vietnam              | Vietnam              | Vietnam              | Vietnam              |

Gray shading indicates the relevant data and indicators of the countries are not ranked due to incomplete information.

**Supplementary Table S44. Rankings of 50 countries and territories March–October 2020 (three-way sensitivity analysis)**

| <b>Rank</b> | <b>Mar</b>     | <b>Apr</b>     | <b>May</b>     | <b>Jun</b>   | <b>Jul</b>     | <b>Aug</b>     | <b>Sep</b>     | <b>Oct</b>     |
|-------------|----------------|----------------|----------------|--------------|----------------|----------------|----------------|----------------|
| 1           | Taiwan         | Taiwan         | Taiwan         | Taiwan       | Taiwan         | Taiwan         | Taiwan         | Taiwan         |
| 2           | Korea          | Korea          | Korea          | Korea        | Italy          | Malaysia       | Korea          | Korea          |
| 3           | Egypt          | Vietnam        | Vietnam        | Vietnam      | Malaysia       | Korea          | Italy          | India          |
| 4           | Poland         | Australia      | New Zealand    | Japan        | Korea          | Turkey         | Japan          | Japan          |
| 5           | Vietnam        | Japan          | Australia      | New Zealand  | Turkey         | Finland        | Malaysia       | Hong Kong      |
| 6           | Brazil         | New Zealand    | Switzerland    | Australia    | Thailand       | Denmark        | Singapore      | Finland        |
| 7           | Qatar          | Czech Republic | Czech Republic | Malaysia     | Netherlands    | Italy          | India          | Netherlands    |
| 8           | Russia         | Hong Kong      | Germany        | Italy        | Germany        | Thailand       | Germany        | Denmark        |
| 9           | South Africa   | Russia         | Japan          | Switzerland  | Finland        | Poland         | Hong Kong      | Australia      |
| 10          | Indonesia      | Austria        | Finland        | Netherlands  | Denmark        | Singapore      | Poland         | Austria        |
| 11          | Japan          | Finland        | Hong Kong      | Finland      | Japan          | Japan          | Portugal       | Russia         |
| 12          | Mexico         | Malaysia       | Russia         | Turkey       | Poland         | Germany        | Finland        | Mexico         |
| 13          | Thailand       | Saudi Arabia   | France         | Denmark      | Hong Kong      | Hong Kong      | Russia         | Switzerland    |
| 14          | Italy          | Poland         | Italy          | Hong Kong    | Switzerland    | Russia         | Switzerland    | Canada         |
| 15          | Sweden         | Portugal       | Turkey         | Hungary      | India          | Sweden         | Denmark        | Czech Republic |
| 16          | Colombia       | Germany        | Austria        | Russia       | United Kingdom | India          | United Kingdom | Germany        |
| 17          | Hungary        | Indonesia      | Hungary        | South Africa | Russia         | Switzerland    | Mexico         | Poland         |
| 18          | Denmark        | Turkey         | Poland         | France       | Singapore      | Portugal       | Netherlands    | Hungary        |
| 19          | Czech Republic | Switzerland    | Portugal       | Germany      | Portugal       | Hungary        | France         | Peru           |
| 20          | Australia      | Singapore      | Saudi Arabia   | Saudi Arabia | France         | United Kingdom | Czech Republic | Colombia       |

|    |                |                |                |                |                |                |               |               |
|----|----------------|----------------|----------------|----------------|----------------|----------------|---------------|---------------|
| 21 | Saudi Arabia   | Hungary        | Netherlands    | Singapore      | Hungary        | Czech Republic | Austria       | United States |
| 22 | Finland        | South Africa   | Malaysia       | Spain          | Sweden         | Netherlands    | United States | Sweden        |
| 23 | Hong Kong      | Denmark        | South Africa   | United Kingdom | Austria        | France         | Peru          | China         |
| 24 | Turkey         | Netherlands    | Indonesia      | Austria        | Czech Republic | Chile          | Sweden        | Argentina     |
| 25 | Argentina      | India          | Singapore      | Portugal       | United States  | Mexico         | Chile         | Belgium       |
| 26 | New Zealand    | France         | Brazil         | United States  | Colombia       | United States  | Hungary       | Brazil        |
| 27 | Singapore      | Italy          | Denmark        | India          | Peru           | Peru           | Colombia      | Chile         |
| 28 | France         | Canada         | India          | Canada         | Chile          | Austria        | Spain         | Egypt         |
| 29 | Netherlands    | Argentina      | Colombia       | Poland         | Spain          | Colombia       | China         | France        |
| 30 | Malaysia       | Peru           | Chile          | Brazil         | Mexico         | Spain          | Argentina     | Greece        |
| 31 | Canada         | Brazil         | Argentina      | Colombia       | China          | China          | Australia     | Indonesia     |
| 32 | Peru           | Mexico         | United Kingdom | Czech Republic | Argentina      | Argentina      | Belgium       | Ireland       |
| 33 | Spain          | Chile          | Mexico         | Indonesia      | Australia      | Australia      | Brazil        | Israel        |
| 34 | Switzerland    | United Kingdom | Peru           | Peru           | Belgium        | Belgium        | Canada        | Italy         |
| 35 | Germany        | United States  | Sweden         | Mexico         | Brazil         | Brazil         | Egypt         | Malaysia      |
| 36 | United States  | Sweden         | United States  | Chile          | Canada         | Canada         | Greece        | New Zealand   |
| 37 | India          | Colombia       | Spain          | Argentina      | Egypt          | Egypt          | Indonesia     | Norway        |
| 38 | Austria        | Spain          | Canada         | Sweden         | Greece         | Greece         | Ireland       | Pakistan      |
| 39 | Chile          | China          | China          | China          | Indonesia      | Indonesia      | Israel        | Philippines   |
| 40 | Portugal       | Belgium        | Belgium        | Belgium        | Ireland        | Ireland        | New Zealand   | Portugal      |
| 41 | United Kingdom | Egypt          | Egypt          | Egypt          | Israel         | Israel         | Norway        | Qatar         |
| 42 | China          | Greece         | Greece         | Greece         | New Zealand    | New Zealand    | Pakistan      | Saudi Arabia  |
| 43 | Belgium        | Ireland        | Ireland        | Ireland        | Norway         | Norway         | Philippines   | Singapore     |

|    |                      |                      |                      |                      |                      |                      |                      |                      |
|----|----------------------|----------------------|----------------------|----------------------|----------------------|----------------------|----------------------|----------------------|
| 44 | Greece               | Israel               | Israel               | Israel               | Pakistan             | Pakistan             | Qatar                | South Africa         |
| 45 | Ireland              | Norway               | Norway               | Norway               | Philippines          | Philippines          | Saudi Arabia         | Spain                |
| 46 | Israel               | Pakistan             | Pakistan             | Pakistan             | Qatar                | Qatar                | South Africa         | Thailand             |
| 47 | Norway               | Philippines          | Philippines          | Philippines          | Saudi Arabia         | Saudi Arabia         | Thailand             | Turkey               |
| 48 | Pakistan             | Qatar                | Qatar                | Qatar                | South Africa         | South Africa         | Turkey               | United Arab Emirates |
| 49 | Philippines          | Thailand             | Thailand             | Thailand             | United Arab Emirates | United Arab Emirates | United Arab Emirates | United Kingdom       |
| 50 | United Arab Emirates | United Arab Emirates | United Arab Emirates | United Arab Emirates | Vietnam              | Vietnam              | Vietnam              | Vietnam              |

Gray shading indicates the relevant data and indicators of the countries are not ranked due to incomplete information.

**Supplementary Table S45. Rankings of 50 countries and territories March 2020–July 2021 (with Google Trends)<sup>a</sup>**

| Mar 2020    | R <sup>b</sup> | Apr2020        | R <sup>b</sup> | May2020        | R <sup>b</sup> | Jun 2020    | R <sup>b</sup> | Jul 2020       | R <sup>b</sup> | Aug 2020       | R <sup>b</sup> | Sep 2020     | R <sup>b</sup> | Oct 2020     | R <sup>b</sup> | Nov 2020     | R <sup>b</sup> |
|-------------|----------------|----------------|----------------|----------------|----------------|-------------|----------------|----------------|----------------|----------------|----------------|--------------|----------------|--------------|----------------|--------------|----------------|
| Taiwan      | 1              | Taiwan         | 1              | South Korea    | 1              | Taiwan      | 1              | Taiwan         | 1              | Taiwan         | 1              | Taiwan       | 1              | Taiwan       | 1              | Taiwan       | 1              |
| Japan       | 2              | South Korea    | 2              | Taiwan         | 2              | South Korea | 2              | South Korea    | 2              | South Korea    | 2              | Singapore    | 2              | Vietnam      | 2              | Vietnam      | 2              |
| Thailand    | 3              | Japan          | 3              | Vietnam        | 3              | Vietnam     | 3              | Netherlands    | 3              | Turkey         | 3              | South Korea  | 3              | New Zealand  | 3              | South Korea  | 3              |
| Russia      | 4              | Australia      | 4              | Germany        | 4              | Australia   | 4              | New Zealand    | 4              | New Zealand    | 4              | Italy        | 4              | Singapore    | 4              | Egypt        | 4              |
| Vietnam     | 5              | Vietnam        | 5              | Australia      | 5              | New Zealand | 5              | Malaysia       | 5              | Finland        | 5              | New Zealand  | 5              | Japan        | 5              | New Zealand  | 5              |
| Qatar       | 6              | Finland        | 6              | New Zealand    | 6              | Malaysia    | 6              | Finland        | 6              | Thailand       | 6              | Germany      | 6              | India        | 6              | India        | 6              |
| Egypt       | 7              | Hong Kong      | 7              | Hong Kong      | 7              | Turkey      | 7              | Italy          | 7              | Italy          | 7              | Japan        | 7              | South Korea  | 6              | Australia    | 7              |
| Mexico      | 8              | Indonesia      | 8              | Japan          | 8              | Japan       | 8              | France         | 8              | Egypt          | 8              | Finland      | 8              | Hong Kong    | 8              | Singapore    | 8              |
| Australia   | 9              | New Zealand    | 9              | Austria        | 9              | Finland     | 9              | Germany        | 9              | Malaysia       | 9              | Thailand     | 9              | Thailand     | 8              | Japan        | 9              |
| South Korea | 10             | Malaysia       | 10             | Czech Republic | 10             | Italy       | 10             | Thailand       | 9              | Germany        | 10             | South Africa | 10             | Saudi Arabia | 10             | Saudi Arabia | 10             |
| Italy       | 11             | Qatar          | 11             | France         | 11             | Denmark     | 11             | Denmark        | 11             | Denmark        | 11             | Turkey       | 10             | Finland      | 11             | Thailand     | 11             |
| New Zealand | 12             | Russia         | 12             | Malaysia       | 12             | Germany     | 12             | Japan          | 12             | Singapore      | 12             | Malaysia     | 12             | Egypt        | 12             | Hong Kong    | 12             |
| Finland     | 13             | Portugal       | 13             | South Africa   | 13             | Qatar       | 13             | Egypt          | 13             | United Kingdom | 13             | Vietnam      | 13             | South Africa | 13             | South Africa | 13             |
| Chile       | 14             | South Africa   | 14             | Indonesia      | 14             | France      | 14             | Vietnam        | 14             | Japan          | 14             | Egypt        | 14             | Turkey       | 13             | Turkey       | 13             |
| Hong Kong   | 15             | Czech Republic | 15             | Qatar          | 15             | Hong Kong   | 15             | Turkey         | 15             | Poland         | 15             | Poland       | 14             | Australia    | 15             | Finland      | 15             |
| Canada      | 16             | Poland         | 16             | Saudi Arabia   | 16             | Russia      | 16             | United Kingdom | 16             | Hungary        | 16             | Saudi Arabia | 16             | Italy        | 16             | Mexico       | 16             |

|                |                 |              |    |             |    |                |    |                |    |               |    |                |    |                |    |                |    |
|----------------|-----------------|--------------|----|-------------|----|----------------|----|----------------|----|---------------|----|----------------|----|----------------|----|----------------|----|
| Sweden         | 16              | Italy        | 17 | Singapore   | 17 | Czech Republic | 17 | Poland         | 17 | Sweden        | 17 | Canada         | 17 | Denmark        | 17 | Peru           | 17 |
| France         | 18              | Germany      | 18 | Egypt       | 18 | Austria        | 18 | Czech Republic | 18 | France        | 18 | Netherlands    | 17 | Canada         | 18 | Italy          | 18 |
| Brazil         | 19              | Saudi Arabia | 18 | Poland      | 18 | Portugal       | 18 | Hong Kong      | 19 | Canada        | 19 | Australia      | 19 | Germany        | 19 | Chile          | 19 |
| India          | 20              | India        | 20 | Russia      | 20 | South Africa   | 20 | Hungary        | 19 | Saudi Arabia  | 20 | United Kingdom | 20 | Netherlands    | 20 | France         | 20 |
| Singapore      | 21              | Hungary      | 21 | Turkey      | 21 | Netherlands    | 21 | India          | 21 | Austria       | 21 | France         | 21 | Chile          | 21 | Germany        | 21 |
| Malaysia       | 22              | Singapore    | 22 | Hungary     | 22 | Hungary        | 22 | Sweden         | 22 | Netherlands   | 21 | Denmark        | 22 | Portugal       | 21 | Brazil         | 22 |
| Netherlands    | 23              | Turkey       | 23 | Italy       | 23 | United Kingdom | 22 | Austria        | 23 | Portugal      | 23 | Hong Kong      | 23 | Mexico         | 23 | Portugal       | 23 |
| Denmark        | 24              | Austria      | 24 | Portugal    | 24 | Saudi Arabia   | 24 | Canada         | 23 | Russia        | 24 | Russia         | 23 | Peru           | 24 | Sweden         | 24 |
| United Kingdom | 24              | Argentina    | 25 | Netherlands | 25 | United States  | 25 | Spain          | 23 | Hong Kong     | 25 | Austria        | 25 | Brazil         | 25 | Malaysia       | 25 |
| Germany        | 26              | Peru         | 25 | Denmark     | 26 | Indonesia      | 26 | Singapore      | 26 | South Africa  | 25 | Brazil         | 26 | United Kingdom | 26 | Denmark        | 26 |
| Austria        | 27              | Brazil       | 27 | India       | 27 | Canada         | 27 | Russia         | 27 | Australia     | 27 | Portugal       | 27 | France         | 27 | Netherlands    | 26 |
| Spain          | 27              | France       | 27 | Brazil      | 28 | Egypt          | 27 | Saudi Arabia   | 28 | India         | 28 | India          | 28 | Russia         | 28 | Argentina      | 28 |
| United States  | 27              | Chile        | 29 | Finland     | 29 | Spain          | 29 | Brazil         | 29 | Vietnam       | 29 | Sweden         | 29 | Malaysia       | 29 | Russia         | 28 |
| Argentina      | NA <sup>c</sup> | Denmark      | 30 | Colombia    | 30 | India          | 30 | South Africa   | 29 | Brazil        | 30 | United States  | 30 | Sweden         | 30 | Austria        | 30 |
| Belgium        | NA <sup>c</sup> | Netherlands  | 30 | Argentina   | 31 | Singapore      | 31 | Australia      | 31 | United States | 31 | Peru           | 31 | Austria        | 31 | United Kingdom | 31 |
| China          | NA <sup>c</sup> | Colombia     | 32 | Spain       | 32 | Poland         | 32 | Portugal       | 31 | Czech         | 32 | Mexico         | 32 | Colombia       | 32 | United States  | 32 |

|                |                 |                |                 |                |                 |             |                 |               |                 |             |                 |                |                 |                |                 |                |                 |
|----------------|-----------------|----------------|-----------------|----------------|-----------------|-------------|-----------------|---------------|-----------------|-------------|-----------------|----------------|-----------------|----------------|-----------------|----------------|-----------------|
|                |                 |                |                 |                |                 |             |                 |               |                 | Republic    |                 |                |                 |                |                 |                |                 |
| Colombia       | NA <sup>c</sup> | Egypt          | 33              | Canada         | 33              | Brazil      | 33              | United States | 33              | Chile       | 33              | Spain          | 33              | Poland         | 33              | Canada         | 33              |
| Czech Republic | NA <sup>c</sup> | Canada         | 34              | Chile          | 33              | Chile       | 34              | Argentina     | 34              | Spain       | 33              | Czech Republic | 34              | Argentina      | 34              | Poland         | 33              |
| Greece         | NA <sup>c</sup> | United States  | 34              | Mexico         | 33              | Colombia    | 35              | Colombia      | 35              | Colombia    | 35              | Hungary        | 35              | Czech Republic | 34              | Colombia       | 35              |
| Hungary        | NA <sup>c</sup> | Mexico         | 36              | Peru           | 33              | Argentina   | 36              | Chile         | 36              | Argentina   | 36              | Chile          | 36              | Spain          | 36              | Spain          | 36              |
| Indonesia      | NA <sup>c</sup> | Spain          | 36              | Sweden         | 37              | Mexico      | 36              | Peru          | 37              | Mexico      | 36              | Colombia       | 37              | United States  | 37              | Hungary        | 37              |
| Ireland        | NA <sup>c</sup> | Sweden         | 38              | United Kingdom | 38              | Peru        | 38              | Mexico        | 38              | Peru        | 38              | Argentina      | 38              | Hungary        | 38              | Czech Republic | 38              |
| Israel         | NA <sup>c</sup> | United Kingdom | 39              | United States  | 39              | Sweden      | 39              | Belgium       | NA <sup>c</sup> | Belgium     | NA <sup>c</sup> | Belgium        | NA <sup>c</sup> | Belgium        | NA <sup>c</sup> | Belgium        | NA <sup>c</sup> |
| Norway         | NA <sup>c</sup> | Belgium        | NA <sup>c</sup> | Belgium        | NA <sup>c</sup> | Belgium     | NA <sup>c</sup> | China         | NA <sup>c</sup> | China       | NA <sup>c</sup> | China          | NA <sup>c</sup> | China          | NA <sup>c</sup> | China          | NA <sup>c</sup> |
| Pakistan       | NA <sup>c</sup> | China          | NA <sup>c</sup> | China          | NA <sup>c</sup> | China       | NA <sup>c</sup> | Greece        | NA <sup>c</sup> | Greece      | NA <sup>c</sup> | Greece         | NA <sup>c</sup> | Greece         | NA <sup>c</sup> | Greece         | NA <sup>c</sup> |
| Peru           | NA <sup>c</sup> | Greece         | NA <sup>c</sup> | Greece         | NA <sup>c</sup> | Greece      | NA <sup>c</sup> | Indonesia     | NA <sup>c</sup> | Indonesia   | NA <sup>c</sup> | Indonesia      | NA <sup>c</sup> | Indonesia      | NA <sup>c</sup> | Indonesia      | NA <sup>c</sup> |
| Philippines    | NA <sup>c</sup> | Ireland        | NA <sup>c</sup> | Ireland        | NA <sup>c</sup> | Ireland     | NA <sup>c</sup> | Ireland       | NA <sup>c</sup> | Ireland     | NA <sup>c</sup> | Ireland        | NA <sup>c</sup> | Ireland        | NA <sup>c</sup> | Ireland        | NA <sup>c</sup> |
| Poland         | NA <sup>c</sup> | Israel         | NA <sup>c</sup> | Israel         | NA <sup>c</sup> | Israel      | NA <sup>c</sup> | Israel        | NA <sup>c</sup> | Israel      | NA <sup>c</sup> | Israel         | NA <sup>c</sup> | Israel         | NA <sup>c</sup> | Israel         | NA <sup>c</sup> |
| Portugal       | NA <sup>c</sup> | Norway         | NA <sup>c</sup> | Norway         | NA <sup>c</sup> | Norway      | NA <sup>c</sup> | Norway        | NA <sup>c</sup> | Norway      | NA <sup>c</sup> | Norway         | NA <sup>c</sup> | Norway         | NA <sup>c</sup> | Norway         | NA <sup>c</sup> |
| Saudi Arabia   | NA <sup>c</sup> | Pakistan       | NA <sup>c</sup> | Pakistan       | NA <sup>c</sup> | Pakistan    | NA <sup>c</sup> | Pakistan      | NA <sup>c</sup> | Pakistan    | NA <sup>c</sup> | Pakistan       | NA <sup>c</sup> | Pakistan       | NA <sup>c</sup> | Pakistan       | NA <sup>c</sup> |
| South Africa   | NA <sup>c</sup> | Philippines    | NA <sup>c</sup> | Philippines    | NA <sup>c</sup> | Philippines | NA <sup>c</sup> | Philippines   | NA <sup>c</sup> | Philippines | NA <sup>c</sup> | Philippines    | NA <sup>c</sup> | Philippines    | NA <sup>c</sup> | Philippines    | NA <sup>c</sup> |
| Switzerland    | NA <sup>c</sup> | Switzerland    | NA <sup>c</sup> | Switzerland    | NA <sup>c</sup> | Switzerland | NA <sup>c</sup> | Qatar         | NA <sup>c</sup> | Qatar       | NA <sup>c</sup> | Qatar          | NA <sup>c</sup> | Qatar          | NA <sup>c</sup> | Qatar          | NA <sup>c</sup> |
| Turkey         | NA <sup>c</sup> | Thailand       | NA <sup>c</sup> | Thailand       | NA <sup>c</sup> | Thailand    | NA <sup>c</sup> | Switzerland   | NA <sup>c</sup> | Switzerland | NA <sup>c</sup> | Switzerland    | NA <sup>c</sup> | Switzerland    | NA <sup>c</sup> | Switzerland    | NA <sup>c</sup> |
| United Arab    | NA <sup>c</sup> | United Arab    | NA <sup>c</sup> | United Arab    | NA <sup>c</sup> | United Arab | NA <sup>c</sup> | United Arab   | NA <sup>c</sup> | United Arab | NA <sup>c</sup> | United Arab    | NA <sup>c</sup> | United Arab    | NA <sup>c</sup> | United Arab    | NA <sup>c</sup> |

|          |          |          |          |          |          |          |          |          |
|----------|----------|----------|----------|----------|----------|----------|----------|----------|
| Emirates | Emirates | Emirates | Emirates | Emirates | Emirates | Emirates | Emirates | Emirates |
|----------|----------|----------|----------|----------|----------|----------|----------|----------|

Notes:

- a. For the calculation method of the indicator, please refer to the alternative calculation method we mentioned in Supplementary Information 7.
- b. R means each country's ranking.
- c. NA: not applicable. Indicates a country not ranked due to incomplete data.



| <b>Dec 2020</b> | <b>R<sup>b</sup></b> | <b>Jan 2021</b> | <b>R<sup>b</sup></b> | <b>Feb 2021</b> | <b>R<sup>b</sup></b> | <b>Mar 2021</b> | <b>R<sup>b</sup></b> | <b>Apr 2021</b> | <b>R<sup>b</sup></b> | <b>May 2021</b> | <b>R<sup>b</sup></b> | <b>Jun 2021</b> | <b>R<sup>b</sup></b> | <b>Jul 2021</b>      | <b>R<sup>b</sup></b> |
|-----------------|----------------------|-----------------|----------------------|-----------------|----------------------|-----------------|----------------------|-----------------|----------------------|-----------------|----------------------|-----------------|----------------------|----------------------|----------------------|
| Taiwan          | 1                    | Singapore       | 1                    | Singapore       | 1                    | Singapore       | 1                    | Singapore       | 1                    | Singapore       | 1                    | Singapore       | 1                    | Singapore            | 1                    |
| Germany         | 2                    | Taiwan          | 2                    | India           | 2                    | Vietnam         | 2                    | United Kingdom  | 2                    | United Kingdom  | 2                    | United States   | 2                    | Qatar                | 2                    |
| Chile           | 3                    | Saudi Arabia    | 3                    | Saudi Arabia    | 3                    | New Zealand     | 3                    | Malaysia        | 3                    | Mexico          | 3                    | Austria         | 3                    | Canada               | 3                    |
| Finland         | 4                    | Turkey          | 4                    | Denmark         | 4                    | Saudi Arabia    | 4                    | Russia          | 4                    | Austria         | 4                    | Poland          | 4                    | Hungary              | 4                    |
| Argentina       | 5                    | Italy           | 5                    | Turkey          | 5                    | South Korea     | 5                    | Austria         | 5                    | Russia          | 5                    | Germany         | 5                    | Sweden               | 5                    |
| Poland          | 6                    | India           | 6                    | Taiwan          | 6                    | Taiwan          | 6                    | United States   | 6                    | Portugal        | 6                    | South Korea     | 6                    | Austria              | 6                    |
| Portugal        | 7                    | Argentina       | 7                    | New Zealand     | 7                    | Australia       | 7                    | Mexico          | 7                    | Italy           | 7                    | Czech Republic  | 7                    | Italy                | 6                    |
| Mexico          | 8                    | Egypt           | 8                    | Australia       | 8                    | Canada          | 8                    | Portugal        | 8                    | Spain           | 8                    | Portugal        | 8                    | Germany              | 8                    |
| Denmark         | 9                    | Finland         | 9                    | Italy           | 9                    | Turkey          | 8                    | Vietnam         | 9                    | United States   | 9                    | Italy           | 9                    | New Zealand          | 9                    |
| Austria         | 10                   | Germany         | 9                    | South Korea     | 10                   | Austria         | 10                   | Italy           | 10                   | South Korea     | 10                   | Mexico          | 10                   | Poland               | 10                   |
| Italy           | 10                   | Denmark         | 11                   | Argentina       | 11                   | Hong Kong       | 10                   | Spain           | 11                   | Germany         | 11                   | Spain           | 11                   | Czech Republic       | 11                   |
| Canada          | 12                   | Portugal        | 11                   | Japan           | 12                   | Japan           | 12                   | Germany         | 12                   | Malaysia        | 12                   | Hong Kong       | 12                   | Hong Kong            | 12                   |
| Russia          | 12                   | Austria         | 13                   | Finland         | 13                   | Argentina       | 13                   | Taiwan          | 12                   | Hong Kong       | 13                   | United Kingdom  | 13                   | United Arab Emirates | 13                   |
| United Kingdom  | 14                   | France          | 13                   | Mexico          | 14                   | Egypt           | 14                   | South Korea     | 14                   | Poland          | 14                   | Sweden          | 14                   | South Korea          | 14                   |
| Sweden          | 15                   | Russia          | 15                   | France          | 15                   | United Kingdom  | 15                   | France          | 15                   | France          | 15                   | France          | 15                   | Australia            | 15                   |
| France          | 16                   | Hungary         | 16                   | Canada          | 16                   | India           | 16                   | Japan           | 16                   | Sweden          | 16                   | Japan           | 16                   | Egypt                | 16                   |
| United States   | 17                   | Sweden          | 17                   | Sweden          | 17                   | Malaysia        | 17                   | Hong Kong       | 17                   | Vietnam         | 17                   | Malaysia        | 17                   | Chile                | 17                   |
| Czech Republic  | 18                   | Spain           | 18                   | Thailand        | 18                   | Thailand        | 18                   | Poland          | 18                   | Taiwan          | 18                   | Vietnam         | 18                   | Denmark              | 18                   |

|             |                 |                |                 |                |                 |                |    |                |                 |                |                 |             |                 |                |    |
|-------------|-----------------|----------------|-----------------|----------------|-----------------|----------------|----|----------------|-----------------|----------------|-----------------|-------------|-----------------|----------------|----|
| Hungary     | 19              | Poland         | 19              | Germany        | 19              | Germany        | 19 | Czech Republic | 19              | Japan          | 19              | Russia      | 19              | Saudi Arabia   | 19 |
| Australia   | NA <sup>c</sup> | Netherlands    | 20              | Austria        | 20              | Russia         | 19 | Sweden         | 20              | Czech Republic | 20              | Taiwan      | 20              | Portugal       | 20 |
| Belgium     | NA <sup>c</sup> | Brazil         | 21              | Malaysia       | 21              | Denmark        | 21 | Argentina      | NA <sup>c</sup> | Argentina      | NA <sup>c</sup> | Argentina   | NA <sup>c</sup> | United Kingdom | 21 |
| Brazil      | NA <sup>c</sup> | Indonesia      | 21              | Hong Kong      | 22              | France         | 22 | Australia      | NA <sup>c</sup> | Australia      | NA <sup>c</sup> | Australia   | NA <sup>c</sup> | Spain          | 22 |
| China       | NA <sup>c</sup> | United Kingdom | 23              | United Kingdom | 23              | Portugal       | 22 | Belgium        | NA <sup>c</sup> | Belgium        | NA <sup>c</sup> | Belgium     | NA <sup>c</sup> | Japan          | 23 |
| Colombia    | NA <sup>c</sup> | Chile          | 24              | Portugal       | 24              | United States  | 24 | Brazil         | NA <sup>c</sup> | Brazil         | NA <sup>c</sup> | Brazil      | NA <sup>c</sup> | Finland        | 24 |
| Egypt       | NA <sup>c</sup> | Czech Republic | 25              | Netherlands    | 25              | Spain          | 25 | Canada         | NA <sup>c</sup> | Canada         | NA <sup>c</sup> | Canada      | NA <sup>c</sup> | Netherlands    | 24 |
| Greece      | NA <sup>c</sup> | United States  | 26              | Chile          | 26              | Italy          | 26 | Chile          | NA <sup>c</sup> | Chile          | NA <sup>c</sup> | Chile       | NA <sup>c</sup> | France         | 26 |
| Hong Kong   | NA <sup>c</sup> | Mexico         | 27              | Poland         | 27              | Colombia       | 27 | China          | NA <sup>c</sup> | China          | NA <sup>c</sup> | China       | NA <sup>c</sup> | Taiwan         | 27 |
| India       | NA <sup>c</sup> | Canada         | 28              | South Africa   | 28              | Sweden         | 27 | Colombia       | NA <sup>c</sup> | Colombia       | NA <sup>c</sup> | Colombia    | NA <sup>c</sup> | Peru           | 28 |
| Indonesia   | NA <sup>c</sup> | Australia      | NA <sup>c</sup> | Czech Republic | 29              | Peru           | 29 | Denmark        | NA <sup>c</sup> | Denmark        | NA <sup>c</sup> | Denmark     | NA <sup>c</sup> | United States  | 28 |
| Ireland     | NA <sup>c</sup> | Belgium        | NA <sup>c</sup> | Colombia       | 30              | Mexico         | 30 | Egypt          | NA <sup>c</sup> | Egypt          | NA <sup>c</sup> | Egypt       | NA <sup>c</sup> | Malaysia       | 30 |
| Israel      | NA <sup>c</sup> | China          | NA <sup>c</sup> | Spain          | 31              | South Africa   | 30 | Finland        | NA <sup>c</sup> | Finland        | NA <sup>c</sup> | Finland     | NA <sup>c</sup> | India          | 31 |
| Japan       | NA <sup>c</sup> | Colombia       | NA <sup>c</sup> | Indonesia      | 32              | Netherlands    | 32 | Greece         | NA <sup>c</sup> | Greece         | NA <sup>c</sup> | Greece      | NA <sup>c</sup> | Thailand       | 32 |
| Malaysia    | NA <sup>c</sup> | Greece         | NA <sup>c</sup> | Peru           | 33              | Finland        | 33 | Hungary        | NA <sup>c</sup> | Hungary        | NA <sup>c</sup> | Hungary     | NA <sup>c</sup> | Turkey         | 33 |
| Netherlands | NA <sup>c</sup> | Hong Kong      | NA <sup>c</sup> | United States  | 34              | Czech Republic | 34 | India          | NA <sup>c</sup> | India          | NA <sup>c</sup> | India       | NA <sup>c</sup> | Brazil         | 34 |
| New Zealand | NA <sup>c</sup> | Ireland        | NA <sup>c</sup> | Brazil         | 35              | Indonesia      | 35 | Indonesia      | NA <sup>c</sup> | Indonesia      | NA <sup>c</sup> | Indonesia   | NA <sup>c</sup> | Argentina      | 35 |
| Norway      | NA <sup>c</sup> | Israel         | NA <sup>c</sup> | Hungary        | 36              | Hungary        | 36 | Ireland        | NA <sup>c</sup> | Ireland        | NA <sup>c</sup> | Ireland     | NA <sup>c</sup> | Colombia       | 35 |
| Pakistan    | NA <sup>c</sup> | Japan          | NA <sup>c</sup> | Belgium        | NA <sup>c</sup> | Chile          | 37 | Israel         | NA <sup>c</sup> | Israel         | NA <sup>c</sup> | Israel      | NA <sup>c</sup> | Mexico         | 37 |
| Peru        | NA <sup>c</sup> | Malaysia       | NA <sup>c</sup> | China          | NA <sup>c</sup> | Poland         | 38 | Netherlands    | NA <sup>c</sup> | Netherlands    | NA <sup>c</sup> | Netherlands | NA <sup>c</sup> | South Africa   | 38 |
| Philippines | NA <sup>c</sup> | New Zealand    | NA <sup>c</sup> | Egypt          | NA <sup>c</sup> | Brazil         | 39 | New Zealand    | NA <sup>c</sup> | New Zealand    | NA <sup>c</sup> | New Zealand | NA <sup>c</sup> | Vietnam        | 38 |

|                      |                 |                      |                 |                      |                 |                      |                 |                      |                 |                      |                 |                      |                 |             |                 |
|----------------------|-----------------|----------------------|-----------------|----------------------|-----------------|----------------------|-----------------|----------------------|-----------------|----------------------|-----------------|----------------------|-----------------|-------------|-----------------|
| Qatar                | NA <sup>c</sup> | Norway               | NA <sup>c</sup> | Greece               | NA <sup>c</sup> | Belgium              | NA <sup>c</sup> | Norway               | NA <sup>c</sup> | Norway               | NA <sup>c</sup> | Norway               | NA <sup>c</sup> | Indonesia   | 40              |
| Saudi Arabia         | NA <sup>c</sup> | Pakistan             | NA <sup>c</sup> | Ireland              | NA <sup>c</sup> | China                | NA <sup>c</sup> | Pakistan             | NA <sup>c</sup> | Pakistan             | NA <sup>c</sup> | Pakistan             | NA <sup>c</sup> | Russia      | 41              |
| Singapore            | NA <sup>c</sup> | Peru                 | NA <sup>c</sup> | Israel               | NA <sup>c</sup> | Greece               | NA <sup>c</sup> | Peru                 | NA <sup>c</sup> | Peru                 | NA <sup>c</sup> | Peru                 | NA <sup>c</sup> | Belgium     | NA <sup>c</sup> |
| South Africa         | NA <sup>c</sup> | Philippines          | NA <sup>c</sup> | Norway               | NA <sup>c</sup> | Ireland              | NA <sup>c</sup> | Philippines          | NA <sup>c</sup> | Philippines          | NA <sup>c</sup> | Philippines          | NA <sup>c</sup> | China       | NA <sup>c</sup> |
| South Korea          | NA <sup>c</sup> | Qatar                | NA <sup>c</sup> | Pakistan             | NA <sup>c</sup> | Israel               | NA <sup>c</sup> | Qatar                | NA <sup>c</sup> | Qatar                | NA <sup>c</sup> | Qatar                | NA <sup>c</sup> | Greece      | NA <sup>c</sup> |
| Spain                | NA <sup>c</sup> | South Africa         | NA <sup>c</sup> | Philippines          | NA <sup>c</sup> | Norway               | NA <sup>c</sup> | Saudi Arabia         | NA <sup>c</sup> | Saudi Arabia         | NA <sup>c</sup> | Saudi Arabia         | NA <sup>c</sup> | Ireland     | NA <sup>c</sup> |
| Switzerland          | NA <sup>c</sup> | South Korea          | NA <sup>c</sup> | Qatar                | NA <sup>c</sup> | Pakistan             | NA <sup>c</sup> | South Africa         | NA <sup>c</sup> | South Africa         | NA <sup>c</sup> | South Africa         | NA <sup>c</sup> | Israel      | NA <sup>c</sup> |
| Thailand             | NA <sup>c</sup> | Switzerland          | NA <sup>c</sup> | Russia               | NA <sup>c</sup> | Philippines          | NA <sup>c</sup> | Switzerland          | NA <sup>c</sup> | Switzerland          | NA <sup>c</sup> | Switzerland          | NA <sup>c</sup> | Norway      | NA <sup>c</sup> |
| Turkey               | NA <sup>c</sup> | Thailand             | NA <sup>c</sup> | Switzerland          | NA <sup>c</sup> | Qatar                | NA <sup>c</sup> | Thailand             | NA <sup>c</sup> | Thailand             | NA <sup>c</sup> | Thailand             | NA <sup>c</sup> | Pakistan    | NA <sup>c</sup> |
| United Arab Emirates | NA <sup>c</sup> | United Arab Emirates | NA <sup>c</sup> | United Arab Emirates | NA <sup>c</sup> | Switzerland          | NA <sup>c</sup> | Turkey               | NA <sup>c</sup> | Turkey               | NA <sup>c</sup> | Turkey               | NA <sup>c</sup> | Philippines | NA <sup>c</sup> |
| Vietnam              | NA <sup>c</sup> | Vietnam              | NA <sup>c</sup> | Vietnam              | NA <sup>c</sup> | United Arab Emirates | NA <sup>c</sup> | United Arab Emirates | NA <sup>c</sup> | United Arab Emirates | NA <sup>c</sup> | United Arab Emirates | NA <sup>c</sup> | Switzerland | NA <sup>c</sup> |

Notes:

- a. For the calculation method of the indicator, please refer to the alternative calculation method we mentioned in Supplementary Information 7.
- b. R means each country's ranking.
- c. NA: not applicable. Indicates a country not ranked due to incomplete data.

**Supplementary Table S46. Rankings of 50 countries and territories March 2020–August 2021 (without Google Trends)<sup>a</sup>**

| Mar 2020    | R <sup>b</sup> | Apr 2020     | R <sup>b</sup> | May 2020    | R <sup>b</sup> | Jun 2020    | R <sup>b</sup> | Jul 2020    | R <sup>b</sup> | Aug 2020    | R <sup>b</sup> | Sep 2020     | R <sup>b</sup> | Oct 2020     | R <sup>b</sup> | Nov 2020     | R <sup>b</sup> |
|-------------|----------------|--------------|----------------|-------------|----------------|-------------|----------------|-------------|----------------|-------------|----------------|--------------|----------------|--------------|----------------|--------------|----------------|
| Taiwan      | 1              | Taiwan       | 1              | South Korea | 1              | Taiwan      | 1              | Taiwan      | 1              | Taiwan      | 1              | Taiwan       | 1              | Taiwan       | 1              | Taiwan       | 1              |
|             |                |              |                |             |                |             |                | New         |                |             |                |              |                |              |                |              |                |
| Vietnam     | 2              | Vietnam      | 2              | Vietnam     | 2              | South Korea | 2              | Zealand     | 2              | China       | 2              | China        | 2              | Vietnam      | 2              | China        | 2              |
| Japan       | 3              | South Korea  | 3              | Australia   | 3              | Vietnam     | 3              | China       | 3              | South Korea | 2              | Singapore    | 3              | New Zealand  | 3              | New Zealand  | 3              |
| Mexico      | 4              | Hong Kong    | 4              | China       | 4              | New Zealand | 4              | South Korea | 3              | Turkey      | 4              | South Korea  | 4              | China        | 4              | Vietnam      | 3              |
| Thailand    | 5              | China        | 5              | Taiwan      | 5              | China       | 5              | Finland     | 5              | Thailand    | 5              | Thailand     | 5              | Singapore    | 5              | Australia    | 5              |
| Egypt       | 6              | Australia    | 6              | Hong Kong   | 6              | Australia   | 6              | Netherlands | 6              | New Zealand | 6              | New Zealand  | 6              | Hong Kong    | 6              | Singapore    | 5              |
| Norway      | 6              | Israel       | 7              | Norway      | 7              | Finland     | 7              | Germany     | 7              | Italy       | 7              | Germany      | 7              | South Korea  | 7              | South Korea  | 5              |
| Russia      | 8              | Malaysia     | 8              | New Zealand | 8              | Norway      | 8              | Malaysia    | 7              | Finland     | 8              | Norway       | 8              | Japan        | 8              | Thailand     | 8              |
| South Korea | 9              | New Zealand  | 9              | Germany     | 9              | Switzerland | 9              | Thailand    | 7              | Norway      | 9              | Vietnam      | 8              | Thailand     | 9              | Egypt        | 9              |
| Qatar       | 10             | Japan        | 10             | Switzerland | 10             | Turkey      | 10             | Ireland     | 10             | Germany     | 10             | Italy        | 10             | Norway       | 10             | Hong Kong    | 9              |
| Hong Kong   | 11             | South Africa | 11             | Greece      | 11             | Japan       | 11             | Italy       | 11             | Egypt       | 11             | Finland      | 11             | India        | 11             | India        | 11             |
|             |                |              |                | Czech       |                |             |                |             |                |             |                |              |                |              |                |              |                |
| Singapore   | 12             | Qatar        | 12             | Republic    | 12             | Malaysia    | 12             | Norway      | 12             | Ireland     | 11             | Japan        | 11             | Saudi Arabia | 11             | Finland      | 12             |
| Greece      | 13             | Indonesia    | 13             | Qatar       | 12             | Qatar       | 12             | France      | 13             | Malaysia    | 13             | Egypt        | 13             | Finland      | 13             | Japan        | 12             |
| Australia   | 14             | Finland      | 14             | Japan       | 14             | Hong Kong   | 14             | Denmark     | 14             | Switzerland | 13             | Turkey       | 14             | Egypt        | 14             | Saudi Arabia | 14             |
| Malaysia    | 15             | Greece       | 14             | Indonesia   | 15             | Italy       | 15             | Greece      | 15             | Singapore   | 15             | Malaysia     | 15             | Turkey       | 15             | Israel       | 15             |
| Chile       | 16             | Norway       | 14             | Israel      | 15             | Denmark     | 16             | Japan       | 16             | Japan       | 16             | South Africa | 16             | Australia    | 16             | South Africa | 16             |
|             |                |              |                | Czech       |                |             |                |             |                |             |                |              |                |              |                |              |                |
| Israel      | 17             | Republic     | 17             | Turkey      | 17             | Germany     | 17             | Switzerland | 17             | Greece      | 17             | Hong Kong    | 17             | South Africa | 17             | Turkey       | 16             |

|             |    |              |    |              |        |              |       |              |    |               |    |               |    |             |    |             |    |
|-------------|----|--------------|----|--------------|--------|--------------|-------|--------------|----|---------------|----|---------------|----|-------------|----|-------------|----|
|             |    |              |    |              | Czech  |              |       |              |    |               |    |               |    |             |    |             |    |
| New Zealand | 17 | Italy        | 18 | Malaysia     | 18     | Republic     | 18    | Vietnam      | 17 | Austria       | 18 | Poland        | 18 | Brazil      | 18 | Ireland     | 18 |
| Italy       | 19 | Portugal     | 19 | Austria      | 19     | Greece       | 18    | Turkey       | 19 | Poland        | 18 | Australia     | 19 | Italy       | 18 | Chile       | 19 |
|             |    |              |    |              |        |              | Czech |              |    | United        |    |               |    |             |    |             |    |
| China       | 20 | Brazil       | 20 | Singapore    | 20     | Israel       | 18    | Republic     | 20 | Kingdom       | 18 | Saudi Arabia  | 20 | Germany     | 20 | Norway      | 19 |
| India       | 21 | Hungary      | 20 | South Africa | 20     | Hungary      | 21    | Egypt        | 20 | Denmark       | 21 | Greece        | 21 | Israel      | 20 | France      | 21 |
| Sweden      | 21 | Ireland      | 22 | Ireland      | 22     | Ireland      | 22    | Hungary      | 22 | Hungary       | 21 | Switzerland   | 21 | Canada      | 22 | Peru        | 22 |
| Finland     | 23 | Poland       | 23 | Belgium      | 23     | Austria      | 23    | Poland       | 22 | Sweden        | 23 | Ireland       | 23 | Chile       | 22 | Mexico      | 23 |
|             |    |              |    |              |        |              |       |              |    |               |    |               |    | United      |    |             |    |
| France      | 24 | Russia       | 23 | Hungary      | 23     | France       | 23    | Belgium      | 24 | Netherlands   | 24 | Kingdom       | 24 | Denmark     | 22 | Germany     | 24 |
|             |    |              |    |              |        |              |       |              |    |               |    |               |    | United      |    |             |    |
| Brazil      | 25 | Germany      | 25 | Poland       | 23     | Netherlands  | 25    | Kingdom      | 24 | France        | 25 | Sweden        | 25 | Ireland     | 22 | Brazil      | 25 |
| Canada      | 26 | Saudi Arabia | 25 | Russia       | 26     | Portugal     | 25    | Singapore    | 26 | Vietnam       | 26 | Canada        | 26 | Mexico      | 22 | Italy       | 25 |
| Netherlands | 27 | Egypt        | 27 | France       | 27     | Spain        | 25    | Sweden       | 27 | Hong Kong     | 27 | Denmark       | 26 | Greece      | 27 | Malaysia    | 25 |
| Philippines | 28 | Turkey       | 27 | Egypt        | 28     | Russia       | 28    | Austria      | 28 | Saudi Arabia  | 27 | Israel        | 26 | Peru        | 28 | Argentina   | 28 |
| Belgium     | 29 | Belgium      | 29 | Saudi Arabia | 28     | Saudi Arabia | 28    | Spain        | 28 | Belgium       | 29 | Netherlands   | 26 | Switzerland | 28 | Portugal    | 28 |
| Denmark     | 29 | India        | 30 | Brazil       | 30     | Belgium      | 30    | Hong Kong    | 30 | Canada        | 30 | Portugal      | 26 | Netherlands | 30 | Denmark     | 30 |
|             |    |              |    |              |        |              |       |              |    |               |    |               |    |             |    |             |    |
|             |    |              |    |              | United |              |       |              |    |               |    |               |    |             |    |             |    |
| Switzerland | 29 | Singapore    | 31 | Denmark      | 31     | Kingdom      | 31    | Saudi Arabia | 31 | Portugal      | 30 | France        | 31 | Portugal    | 30 | Netherlands | 30 |
| Ireland     | 32 | Philippines  | 32 | Portugal     | 32     | Brazil       | 32    | India        | 32 | United States | 32 | United States | 32 | France      | 32 | Greece      | 32 |
| Germany     | 33 | France       | 33 | Netherlands  | 33     | Singapore    | 32    | Canada       | 33 | India         | 33 | Austria       | 33 | Malaysia    | 33 | Belgium     | 33 |
| Austria     | 34 | Argentina    | 34 | Spain        | 34     | South Africa | 32    | Israel       | 33 | Russia        | 33 | Belgium       | 33 | Austria     | 34 | Philippines | 33 |
| Spain       | 34 | Austria      | 34 | Italy        | 35     | Egypt        | 35    | Portugal     | 33 | Czech         | 35 | India         | 33 | Sweden      | 35 | Poland      | 35 |

|                |                 |                |                 |               |                 |               |                 |                 |                 |                 |                 |                 |                 |                 |                 |                 |                 |
|----------------|-----------------|----------------|-----------------|---------------|-----------------|---------------|-----------------|-----------------|-----------------|-----------------|-----------------|-----------------|-----------------|-----------------|-----------------|-----------------|-----------------|
| United Kingdom | 34              | Chile          | 34              | Philippines   | 36              | United States | 36              | Russia          | 36              | Israel          | 35              | Russia          | 33              | United Kingdom  | 36              | United Kingdom  | 35              |
|                |                 |                |                 |               |                 |               |                 | United          |                 |                 |                 |                 |                 |                 |                 |                 |                 |
| United States  | 37              | Peru           | 34              | Chile         | 37              | Canada        | 37              | States          | 36              | Australia       | 37              | Brazil          | 37              | United States   | 37              | Austria         | 37              |
| Argentina      | NA <sup>c</sup> | Denmark        | 38              | Mexico        | 37              | Indonesia     | 37              | Brazil          | 38              | Brazil          | 38              | Mexico          | 38              | Argentina       | 38              | Russia          | 38              |
|                | NA <sup>c</sup> |                |                 |               |                 |               |                 |                 |                 |                 |                 | Czech           |                 | Czech           |                 |                 |                 |
| Colombia       |                 | Switzerland    | 38              | Finland       | 39              | Poland        | 39              | South Africa    | 38              | South Africa    | 38              | Republic        | 39              | Republic        | 38              | Switzerland     | 38              |
| Czech Republic | NA <sup>c</sup> |                |                 |               |                 |               |                 |                 |                 |                 |                 |                 |                 |                 |                 |                 |                 |
|                |                 | Colombia       | 40              | India         | 40              | Mexico        | 40              | Argentina       | 40              | Mexico          | 40              | Philippines     | 39              | Philippines     | 38              | Sweden          | 40              |
| Hungary        | NA <sup>c</sup> | Netherlands    | 41              | Colombia      | 41              | Philippines   | 41              | Australia       | 40              | Spain           | 40              | Hungary         | 41              | Russia          | 38              | Hungary         | 41              |
| Indonesia      | NA <sup>c</sup> | Mexico         | 42              | Argentina     | 42              | India         | 42              | Philippines     | 42              | Philippines     | 42              | Peru            | 42              | Spain           | 38              | Colombia        | 42              |
| Pakistan       | NA <sup>c</sup> | Spain          | 42              | Peru          | 43              | Argentina     | 43              | Peru            | 43              | Argentina       | 43              | Argentina       | 43              | Belgium         | 43              | United States   | 43              |
|                | NA <sup>c</sup> |                |                 |               |                 |               |                 |                 |                 |                 |                 |                 |                 |                 |                 | Czech           |                 |
| Peru           |                 | United States  | 44              | United States | 44              | Chile         | 43              | Chile           | 44              | Chile           | 43              | Chile           | 43              | Colombia        | 44              | Republic        | 44              |
|                | NA <sup>c</sup> |                |                 | United        |                 |               |                 |                 |                 |                 |                 |                 |                 |                 |                 |                 |                 |
| Poland         |                 | Sweden         | 45              | Kingdom       | 45              | Colombia      | 45              | Mexico          | 44              | Colombia        | 45              | Spain           | 43              | Hungary         | 45              | Spain           | 44              |
| Portugal       | NA <sup>c</sup> | Canada         | 46              | Canada        | 46              | Peru          | 46              | Colombia        | 46              | Peru            | 45              | Colombia        | 46              | Poland          | 45              | Canada          | 46              |
|                | NA <sup>c</sup> | United Kingdom |                 |               |                 |               |                 | NA <sup>c</sup> |                 | NA <sup>c</sup> |                 | NA <sup>c</sup> |                 | NA <sup>c</sup> |                 | NA <sup>c</sup> | NA <sup>c</sup> |
| Saudi Arabia   |                 | Kingdom        | 47              | Sweden        | 47              | Sweden        | 47              | Indonesia       |                 | Indonesia       |                 | Indonesia       |                 | Indonesia       |                 | Indonesia       |                 |
| South Africa   | NA <sup>c</sup> | Pakistan       | NA <sup>c</sup> | Pakistan      | NA <sup>c</sup> | Pakistan      | NA <sup>c</sup> | Pakistan        | NA <sup>c</sup> | Pakistan        | NA <sup>c</sup> | Pakistan        | NA <sup>c</sup> | Pakistan        | NA <sup>c</sup> | Pakistan        | NA <sup>c</sup> |
| Turkey         | NA <sup>c</sup> | Thailand       | NA <sup>c</sup> | Thailand      | NA <sup>c</sup> | Thailand      | NA <sup>c</sup> | Qatar           | NA <sup>c</sup> | Qatar           | NA <sup>c</sup> | Qatar           | NA <sup>c</sup> | Qatar           | NA <sup>c</sup> | Qatar           | NA <sup>c</sup> |
| United Arab    | NA <sup>c</sup> | United Arab    | NA <sup>c</sup> | United Arab   | NA <sup>c</sup> | United Arab   | NA <sup>c</sup> | United Arab     | NA <sup>c</sup> | United Arab     | NA <sup>c</sup> | United Arab     | NA <sup>c</sup> | United Arab     | NA <sup>c</sup> | United Arab     | NA <sup>c</sup> |

Emirates

Emirates

Emirates

Emirates

Emirates

Emirates

Emirates

Emirates

Emirates

Notes:

- a. For the calculation method of the indicator, please refer to the alternative calculation method we mentioned in Supplementary Information 7.
- b. R means each country's ranking.
- c. NA: not applicable. Indicates a country not ranked due to incomplete data.

| Dec 2020       | R <sup>b</sup> | Jan 2021     | R <sup>b</sup> | Feb 2021     | R <sup>b</sup> | Mar 2021     | R <sup>b</sup> | Apr 2021       | R <sup>b</sup> | May 2021       | R <sup>b</sup> | Jun 2021       | R <sup>b</sup> | Jul 2021       | R <sup>b</sup> | Aug 2021       | R <sup>b</sup> |
|----------------|----------------|--------------|----------------|--------------|----------------|--------------|----------------|----------------|----------------|----------------|----------------|----------------|----------------|----------------|----------------|----------------|----------------|
| China          | 1              | Singapore    | 1              | Singapore    | 1              | Singapore    | 1              | Singapore      | 1              | Singapore      | 1              | Singapore      | 1              | China          | 1              | China          | 1              |
| Taiwan         | 2              | China        | 2              | China        | 2              | China        | 2              | United Kingdom | 2              | United Kingdom | 2              | China          | 2              | Switzerland    | 2              | Singapore      | 2              |
| Norway         | 3              | Taiwan       | 3              | India        | 3              | Vietnam      | 3              | China          | 3              | China          | 3              | United States  | 3              | Qatar          | 3              | Czech Republic | 3              |
| Finland        | 4              | Turkey       | 4              | Turkey       | 4              | New Zealand  | 4              | Malaysia       | 4              | Mexico         | 4              | Austria        | 4              | Singapore      | 4              | Sweden         | 4              |
| Israel         | 5              | Italy        | 5              | New Zealand  | 5              | Australia    | 5              | Mexico         | 5              | Portugal       | 5              | Germany        | 5              | Austria        | 5              | Canada         | 5              |
| Argentina      | 6              | Saudi Arabia | 5              | Denmark      | 6              | Saudi Arabia | 6              | Spain          | 5              | United States  | 6              | Hong Kong      | 5              | Hungary        | 6              | Hungary        | 5              |
| Chile          | 7              | India        | 7              | Taiwan       | 7              | Taiwan       | 7              | United States  | 7              | Austria        | 7              | Portugal       | 5              | Norway         | 7              | Poland         | 7              |
| Germany        | 8              | Argentina    | 8              | Saudi Arabia | 8              | India        | 8              | Austria        | 8              | Spain          | 8              | South Korea    | 8              | Sweden         | 8              | Austria        | 8              |
| Portugal       | 9              | Finland      | 9              | Australia    | 9              | Canada       | 9              | Portugal       | 8              | Italy          | 9              | Mexico         | 9              | Canada         | 9              | Italy          | 8              |
| Denmark        | 10             | Denmark      | 10             | Argentina    | 10             | South Korea  | 9              | Russia         | 10             | Russia         | 10             | Poland         | 9              | Czech Republic | 9              | Norway         | 10             |
| Ireland        | 10             | Greece       | 11             | South Korea  | 10             | Turkey       | 9              | Vietnam        | 10             | South Korea    | 11             | Italy          | 11             | New Zealand    | 11             | Belgium        | 11             |
| Italy          | 12             | Israel       | 11             | Finland      | 12             | Hong Kong    | 12             | South Korea    | 12             | Germany        | 12             | Czech Republic | 12             | Germany        | 12             | Chile          | 12             |
| Poland         | 13             | Spain        | 13             | Italy        | 13             | Austria      | 13             | Germany        | 13             | France         | 13             | Belgium        | 13             | Italy          | 12             | Germany        | 12             |
| Czech Republic | 14             | Belgium      | 14             | Japan        | 14             | Japan        | 14             | Taiwan         | 13             | Hong Kong      | 14             | United Kingdom | 14             | Poland         | 14             | Portugal       | 12             |
| Greece         | 15             | Egypt        | 14             | Thailand     | 14             | United       | 15             | France         | 15             | Malaysia       | 15             | Spain          | 15             | Belgium        | 15             | Saudi Arabia   | 15             |



| Kingdom        |                 |                |    |                |    |               |    |                |                 |                |                 |             |                 |                      |    |                      |    |
|----------------|-----------------|----------------|----|----------------|----|---------------|----|----------------|-----------------|----------------|-----------------|-------------|-----------------|----------------------|----|----------------------|----|
| Canada         | 16              | Portugal       | 16 | Belgium        | 16 | Thailand      | 16 | Italy          | 15              | Poland         | 16              | Sweden      | 16              | United Arab Emirates | 15 | Egypt                | 16 |
| Switzerland    | 16              | Ireland        | 17 | Switzerland    | 16 | Argentina     | 17 | Hong Kong      | 17              | Philippines    | 17              | France      | 17              | Hong Kong            | 17 | Denmark              | 17 |
| Mexico         | 18              | Hungary        | 18 | Norway         | 18 | Denmark       | 17 | Philippines    | 17              | Belgium        | 18              | Philippines | 18              | Israel               | 18 | South Korea          | 17 |
| United Kingdom | 19              | Germany        | 19 | Hong Kong      | 19 | Spain         | 17 | Japan          | 19              | Sweden         | 19              | Japan       | 19              | Egypt                | 19 | United Arab Emirates | 17 |
| Austria        | 20              | Czech Republic | 20 | Israel         | 20 | Egypt         | 20 | Belgium        | 20              | Vietnam        | 20              | Malaysia    | 20              | Chile                | 20 | Colombia             | 20 |
| France         | 20              | France         | 21 | Austria        | 21 | France        | 20 | Czech Republic | 21              | Japan          | 21              | Vietnam     | 21              | Denmark              | 21 | New Zealand          | 21 |
| United States  | 22              | Switzerland    | 22 | France         | 21 | United States | 22 | Poland         | 22              | Czech Republic | 22              | Russia      | 22              | Portugal             | 21 | France               | 22 |
| Sweden         | 23              | Chile          | 23 | Greece         | 23 | Switzerland   | 23 | Sweden         | 23              | Taiwan         | 23              | Taiwan      | 23              | South Korea          | 21 | Netherlands          | 22 |
| Belgium        | 24              | Norway         | 23 | Canada         | 24 | Germany       | 24 | Argentina      | NA <sup>c</sup> | Argentina      | NA <sup>c</sup> | Argentina   | NA <sup>c</sup> | Australia            | 24 | Australia            | 24 |
| Russia         | 24              | Poland         | 25 | Chile          | 24 | Portugal      | 25 | Australia      | NA <sup>c</sup> | Australia      | NA <sup>c</sup> | Australia   | NA <sup>c</sup> | Ireland              | 24 | India                | 24 |
| Hungary        | 26              | Austria        | 26 | Ireland        | 24 | Malaysia      | 26 | Brazil         | NA <sup>c</sup> | Brazil         | NA <sup>c</sup> | Brazil      | NA <sup>c</sup> | Finland              | 26 | Ireland              | 24 |
| Australia      | NA <sup>c</sup> | Russia         | 26 | United Kingdom | 24 | Norway        | 27 | Canada         | NA <sup>c</sup> | Canada         | NA <sup>c</sup> | Canada      | NA <sup>c</sup> | Saudi Arabia         | 27 | Israel               | 24 |
| Brazil         | NA <sup>c</sup> | United Kingdom | 28 | Germany        | 28 | Israel        | 28 | Chile          | NA <sup>c</sup> | Chile          | NA <sup>c</sup> | Chile       | NA <sup>c</sup> | France               | 28 | Taiwan               | 28 |
| Colombia       | NA <sup>c</sup> | United States  | 28 | Sweden         | 28 | Colombia      | 29 | Colombia       | NA <sup>c</sup> | Colombia       | NA <sup>c</sup> | Colombia    | NA <sup>c</sup> | United Kingdom       | 28 | Japan                | 29 |

|              |                 |              |                 |                |                 |                |                 |              |                 |              |                 |              |                 |               |    |                |                 |
|--------------|-----------------|--------------|-----------------|----------------|-----------------|----------------|-----------------|--------------|-----------------|--------------|-----------------|--------------|-----------------|---------------|----|----------------|-----------------|
| Egypt        | NA <sup>c</sup> | Brazil       | 30              | Czech Republic | 30              | Russia         | 29              | Denmark      | NA <sup>c</sup> | Denmark      | NA <sup>c</sup> | Denmark      | NA <sup>c</sup> | United States | 28 | Peru           | 30              |
| Hong Kong    | NA <sup>c</sup> | Netherlands  | 31              | Portugal       | 31              | Ireland        | 31              | Egypt        | NA <sup>c</sup> | Egypt        | NA <sup>c</sup> | Egypt        | NA <sup>c</sup> | India         | 31 | Switzerland    | 30              |
| India        | NA <sup>c</sup> | Sweden       | 31              | Mexico         | 32              | Mexico         | 32              | Finland      | NA <sup>c</sup> | Finland      | NA <sup>c</sup> | Finland      | NA <sup>c</sup> | Pakistan      | 31 | United Kingdom | 30              |
| Indonesia    | NA <sup>c</sup> | Indonesia    | 33              | Malaysia       | 33              | Finland        | 33              | Greece       | NA <sup>c</sup> | Greece       | NA <sup>c</sup> | Greece       | NA <sup>c</sup> | Taiwan        | 31 | Finland        | 33              |
| Japan        | NA <sup>c</sup> | Mexico       | 34              | Netherlands    | 34              | Sweden         | 34              | Hungary      | NA <sup>c</sup> | Hungary      | NA <sup>c</sup> | Hungary      | NA <sup>c</sup> | Turkey        | 31 | Pakistan       | 34              |
| Malaysia     | NA <sup>c</sup> | Canada       | 35              | South Africa   | 35              | Czech Republic | 35              | India        | NA <sup>c</sup> | India        | NA <sup>c</sup> | India        | NA <sup>c</sup> | Netherlands   | 35 | Argentina      | 35              |
| Netherlands  | NA <sup>c</sup> | Australia    | NA <sup>c</sup> | Spain          | 35              | Greece         | 35              | Indonesia    | NA <sup>c</sup> | Indonesia    | NA <sup>c</sup> | Indonesia    | NA <sup>c</sup> | Spain         | 36 | Spain          | 36              |
| New Zealand  | NA <sup>c</sup> | Colombia     | NA <sup>c</sup> | United States  | 35              | Italy          | 37              | Ireland      | NA <sup>c</sup> | Ireland      | NA <sup>c</sup> | Ireland      | NA <sup>c</sup> | Japan         | 37 | Greece         | 37              |
| Pakistan     | NA <sup>c</sup> | Hong Kong    | NA <sup>c</sup> | Colombia       | 38              | Chile          | 38              | Israel       | NA <sup>c</sup> | Israel       | NA <sup>c</sup> | Israel       | NA <sup>c</sup> | Peru          | 38 | Indonesia      | 37              |
| Peru         | NA <sup>c</sup> | Japan        | NA <sup>c</sup> | Poland         | 38              | Belgium        | 39              | Netherlands  | NA <sup>c</sup> | Netherlands  | NA <sup>c</sup> | Netherlands  | NA <sup>c</sup> | Philippines   | 39 | South Africa   | 37              |
| Philippines  | NA <sup>c</sup> | Malaysia     | NA <sup>c</sup> | Hungary        | 40              | South Africa   | 39              | New Zealand  | NA <sup>c</sup> | New Zealand  | NA <sup>c</sup> | New Zealand  | NA <sup>c</sup> | Brazil        | 40 | United States  | 37              |
| Qatar        | NA <sup>c</sup> | New Zealand  | NA <sup>c</sup> | Brazil         | 41              | Netherlands    | 41              | Norway       | NA <sup>c</sup> | Norway       | NA <sup>c</sup> | Norway       | NA <sup>c</sup> | Greece        | 40 | Turkey         | 41              |
| Saudi Arabia | NA <sup>c</sup> | Pakistan     | NA <sup>c</sup> | Indonesia      | 42              | Hungary        | 42              | Pakistan     | NA <sup>c</sup> | Pakistan     | NA <sup>c</sup> | Pakistan     | NA <sup>c</sup> | Malaysia      | 42 | Brazil         | 42              |
| Singapore    | NA <sup>c</sup> | Peru         | NA <sup>c</sup> | Peru           | 43              | Peru           | 42              | Peru         | NA <sup>c</sup> | Peru         | NA <sup>c</sup> | Peru         | NA <sup>c</sup> | Argentina     | 43 | Mexico         | 43              |
| South Africa | NA <sup>c</sup> | Philippines  | NA <sup>c</sup> | Philippines    | 43              | Brazil         | 44              | Qatar        | NA <sup>c</sup> | Qatar        | NA <sup>c</sup> | Qatar        | NA <sup>c</sup> | Mexico        | 43 | Philippines    | 43              |
| South Korea  | NA <sup>c</sup> | Qatar        | NA <sup>c</sup> | Egypt          | NA <sup>c</sup> | Indonesia      | 44              | Saudi Arabia | NA <sup>c</sup> | Saudi Arabia | NA <sup>c</sup> | Saudi Arabia | NA <sup>c</sup> | Vietnam       | 43 | Thailand       | 43              |
| Spain        | NA <sup>c</sup> | South Africa | NA <sup>c</sup> | Pakistan       | NA <sup>c</sup> | Poland         | 46              | South Africa | NA <sup>c</sup> | South Africa | NA <sup>c</sup> | South Africa | NA <sup>c</sup> | Thailand      | 46 | Vietnam        | 43              |
| Thailand     | NA <sup>c</sup> | South Korea  | NA <sup>c</sup> | Qatar          | NA <sup>c</sup> | Philippines    | 47              | Switzerland  | NA <sup>c</sup> | Switzerland  | NA <sup>c</sup> | Switzerland  | NA <sup>c</sup> | Indonesia     | 47 | Russia         | 47              |
| Turkey       | NA <sup>c</sup> | Thailand     | NA <sup>c</sup> | Russia         | NA <sup>c</sup> | Pakistan       | NA <sup>c</sup> | Thailand     | NA <sup>c</sup> | Thailand     | NA <sup>c</sup> | Thailand     | NA <sup>c</sup> | Colombia      | 48 | Hong Kong      | NA <sup>c</sup> |
| United Arab  | NA <sup>c</sup> | United Arab  | NA <sup>c</sup> | United Arab    | NA <sup>c</sup> | Qatar          | NA <sup>c</sup> | Turkey       | NA <sup>c</sup> | Turkey       | NA <sup>c</sup> | Turkey       | NA <sup>c</sup> | South Africa  | 49 | Malaysia       | NA <sup>c</sup> |

|          |                            |                            |                 |                         |                 |                         |                 |                         |                 |                         |                 |        |             |                 |
|----------|----------------------------|----------------------------|-----------------|-------------------------|-----------------|-------------------------|-----------------|-------------------------|-----------------|-------------------------|-----------------|--------|-------------|-----------------|
| Emirates | Emirates                   | Emirates                   |                 |                         |                 |                         |                 |                         |                 |                         |                 |        |             |                 |
| Vietnam  | NA <sup>c</sup><br>Vietnam | NA <sup>c</sup><br>Vietnam | NA <sup>c</sup> | United Arab<br>Emirates | NA <sup>c</sup> | United Arab<br>Emirates | NA <sup>c</sup> | United Arab<br>Emirates | NA <sup>c</sup> | United Arab<br>Emirates | NA <sup>c</sup> | Russia | 50<br>Qatar | NA <sup>c</sup> |

Notes:

- a. For the calculation method of the indicator, please refer to the alternative calculation method we mentioned in Supplementary Information 7.
- b. R means each country's ranking.
- c. NA: not applicable. Indicates a country not ranked due to incomplete data.

## Supplementary Information 14. Vaccination Coverage

**Supplementary Table S47. Association between people covered by vaccines and one-month cases per 100,000 members of the population from December 2020 to August 2021.**

| People covered by<br>vaccines | One-month cases per 100,000 members of the population |                             |                      |          |                             |                      |          |                             |                      |          |                             |                      |          |                             |                      |
|-------------------------------|-------------------------------------------------------|-----------------------------|----------------------|----------|-----------------------------|----------------------|----------|-----------------------------|----------------------|----------|-----------------------------|----------------------|----------|-----------------------------|----------------------|
|                               | Dec 2020                                              |                             |                      | Jan 2021 |                             |                      | Feb 2021 |                             |                      | Mar 2021 |                             |                      | Apr 2021 |                             |                      |
|                               | n                                                     | r <sub>s</sub> <sup>a</sup> | P value <sup>b</sup> | n        | r <sub>s</sub> <sup>a</sup> | P value <sup>b</sup> | n        | r <sub>s</sub> <sup>a</sup> | P value <sup>b</sup> | n        | r <sub>s</sub> <sup>a</sup> | P value <sup>b</sup> | n        | r <sub>s</sub> <sup>a</sup> | P value <sup>b</sup> |
| Dec 2020                      | 27                                                    | 0.49                        | <b>0.010</b>         | 27       | 0.50                        | <b>0.009</b>         | 27       | 0.15                        | 0.452                | 27       | -0.19                       | 0.351                | 27       | -0.33                       | 0.093                |
| Jan 2021                      | 37                                                    | 0.63                        | <b>&lt;.0001</b>     | 37       | 0.67                        | <b>&lt;.0001</b>     | 37       | 0.59                        | <b>0.0001</b>        | 37       | 0.31                        | 0.058                | 37       | 0.09                        | 0.587                |
| Feb 2021                      | 47                                                    | 0.71                        | <b>&lt;.0001</b>     | 47       | 0.64                        | <b>&lt;.0001</b>     | 47       | 0.66                        | <b>&lt;.0001</b>     | 47       | 0.62                        | <b>&lt;.0001</b>     | 47       | 0.46                        | <b>0.001</b>         |
| Mar 2021                      | 50                                                    | 0.62                        | <b>&lt;.0001</b>     | 50       | 0.58                        | <b>&lt;.0001</b>     | 50       | 0.63                        | <b>&lt;.0001</b>     | 50       | 0.62                        | <b>&lt;.0001</b>     | 50       | 0.48                        | <b>0.0004</b>        |
| Apr 2021                      | 50                                                    | 0.60                        | <b>&lt;.0001</b>     | 50       | 0.57                        | <b>&lt;.0001</b>     | 50       | 0.63                        | <b>&lt;.0001</b>     | 50       | 0.60                        | <b>&lt;.0001</b>     | 50       | 0.45                        | <b>0.001</b>         |
| May 2021                      | 50                                                    | 0.62                        | <b>&lt;.0001</b>     | 50       | 0.57                        | <b>&lt;.0001</b>     | 50       | 0.63                        | <b>&lt;.0001</b>     | 50       | 0.59                        | <b>&lt;.0001</b>     | 50       | 0.46                        | <b>0.001</b>         |
| Jun 2021                      | 50                                                    | 0.57                        | <b>&lt;.0001</b>     | 50       | 0.54                        | <b>&lt;.0001</b>     | 50       | 0.59                        | <b>&lt;.0001</b>     | 50       | 0.55                        | <b>&lt;.0001</b>     | 50       | 0.43                        | <b>0.002</b>         |
| Jul 2021                      | 50                                                    | 0.50                        | <b>0.0002</b>        | 50       | 0.52                        | <b>0.0001</b>        | 50       | 0.56                        | <b>&lt;.0001</b>     | 50       | 0.49                        | <b>0.0003</b>        | 50       | 0.39                        | <b>0.005</b>         |
| Aug 2021                      | 50                                                    | 0.44                        | <b>0.001</b>         | 50       | 0.48                        | <b>0.0004</b>        | 50       | 0.52                        | <b>0.0001</b>        | 50       | 0.44                        | <b>0.001</b>         | 50       | 0.34                        | <b>0.017</b>         |

<sup>a</sup> Spearman Correlation Coefficients.

<sup>b</sup> P value indicating correlation is significantly different than zero.

| People covered by | One-month cases per 100,000 members of the population |         |                        |          |         |                        |          |         |                        |          |         |                        |
|-------------------|-------------------------------------------------------|---------|------------------------|----------|---------|------------------------|----------|---------|------------------------|----------|---------|------------------------|
|                   | May 2021                                              |         |                        | Jun 2021 |         |                        | Jul 2021 |         |                        | Aug 2021 |         |                        |
| vaccines          | n                                                     | $r_s^a$ | $P$ value <sup>b</sup> | n        | $r_s^a$ | $P$ value <sup>b</sup> | n        | $r_s^a$ | $P$ value <sup>b</sup> | n        | $r_s^a$ | $P$ value <sup>b</sup> |
| Dec 2020          | 27                                                    | -0.22   | 0.280                  | 27       | -0.02   | 0.912                  | 27       | 0.13    | 0.533                  | 27       | 0.24    | 0.233                  |
| Jan 2021          | 37                                                    | 0.01    | 0.943                  | 37       | 0.07    | 0.700                  | 37       | 0.25    | 0.133                  | 37       | 0.50    | <b>0.002</b>           |
| Feb 2021          | 47                                                    | 0.30    | <b>0.038</b>           | 47       | 0.23    | 0.123                  | 47       | 0.26    | 0.083                  | 47       | 0.38    | <b>0.009</b>           |
| Mar 2021          | 50                                                    | 0.33    | <b>0.021</b>           | 50       | 0.21    | 0.136                  | 50       | 0.22    | 0.133                  | 50       | 0.32    | <b>0.023</b>           |
| Apr 2021          | 50                                                    | 0.31    | <b>0.026</b>           | 50       | 0.15    | 0.308                  | 50       | 0.14    | 0.318                  | 50       | 0.25    | 0.086                  |
| May 2021          | 50                                                    | 0.33    | <b>0.019</b>           | 50       | 0.14    | 0.329                  | 50       | 0.14    | 0.336                  | 50       | 0.23    | 0.115                  |
| Jun 2021          | 50                                                    | 0.32    | <b>0.025</b>           | 50       | 0.14    | 0.340                  | 50       | 0.14    | 0.316                  | 50       | 0.24    | 0.090                  |
| Jul 2021          | 50                                                    | 0.32    | <b>0.024</b>           | 50       | 0.17    | 0.248                  | 50       | 0.16    | 0.254                  | 50       | 0.24    | 0.099                  |
| Aug 2021          | 50                                                    | 0.28    | 0.052                  | 50       | 0.16    | 0.275                  | 50       | 0.17    | 0.235                  | 50       | 0.26    | 0.068                  |

<sup>a</sup> Spearman Correlation Coefficients.

<sup>b</sup>  $P$  value indicating correlation is significantly different than zero.

**Supplementary Table S48. Association between people covered by vaccines and infection growth rate from December 2020 to August 2021.**

| People covered by<br>vaccines | Infection growth rate |                             |                      |          |                             |                      |          |                             |                      |          |                             |                      |          |                             |                      |
|-------------------------------|-----------------------|-----------------------------|----------------------|----------|-----------------------------|----------------------|----------|-----------------------------|----------------------|----------|-----------------------------|----------------------|----------|-----------------------------|----------------------|
|                               | Dec 2020              |                             |                      | Jan 2021 |                             |                      | Feb 2021 |                             |                      | Mar 2021 |                             |                      | Apr 2021 |                             |                      |
|                               | n                     | r <sub>s</sub> <sup>a</sup> | P value <sup>b</sup> | n        | r <sub>s</sub> <sup>a</sup> | P value <sup>b</sup> | n        | r <sub>s</sub> <sup>a</sup> | P value <sup>b</sup> | n        | r <sub>s</sub> <sup>a</sup> | P value <sup>b</sup> | n        | r <sub>s</sub> <sup>a</sup> | P value <sup>b</sup> |
| Dec 2020                      | 27                    | 0.36                        | 0.064                | 27       | 0.064                       | <b>0.017</b>         | 27       | -0.15                       | 0.446                | 27       | -0.41                       | <b>0.035</b>         | 27       | -0.39                       | <b>0.046</b>         |
| Jan 2021                      | 37                    | 0.38                        | <b>0.021</b>         | 37       | 0.44                        | <b>0.007</b>         | 37       | 0.22                        | 0.191                | 37       | -0.05                       | 0.791                | 37       | -0.28                       | 0.092                |
| Feb 2021                      | 47                    | 0.23                        | 0.127                | 47       | 0.17                        | 0.242                | 47       | 0.24                        | 0.107                | 47       | 0.20                        | 0.168                | 47       | -0.16                       | 0.271                |
| Mar 2021                      | 50                    | 0.14                        | 0.341                | 50       | 0.06                        | 0.702                | 50       | 0.11                        | 0.453                | 50       | 0.18                        | 0.220                | 50       | -0.17                       | 0.242                |
| Apr 2021                      | 50                    | 0.12                        | 0.424                | 50       | 0.09                        | 0.550                | 50       | 0.13                        | 0.377                | 50       | 0.15                        | 0.310                | 50       | -0.16                       | 0.272                |
| May 2021                      | 50                    | 0.13                        | 0.361                | 50       | 0.06                        | 0.678                | 50       | 0.09                        | 0.546                | 50       | 0.12                        | 0.410                | 50       | -0.16                       | 0.279                |
| Jun 2021                      | 50                    | 0.14                        | 0.348                | 50       | 0.08                        | 0.599                | 50       | 0.06                        | 0.673                | 50       | 0.08                        | 0.572                | 50       | -0.16                       | 0.258                |
| Jul 2021                      | 50                    | 0.09                        | 0.545                | 50       | 0.10                        | 0.502                | 50       | 0.07                        | 0.640                | 50       | 0.05                        | 0.751                | 50       | -0.18                       | 0.217                |
| Aug 2021                      | 50                    | 0.07                        | 0.628                | 50       | 0.11                        | 0.437                | 50       | 0.08                        | 0.584                | 50       | 0.03                        | 0.841                | 50       | -0.21                       | 0.150                |

<sup>a</sup> Spearman Correlation Coefficients.

<sup>b</sup> P value indicating correlation is significantly different than zero.

| People covered by<br>vaccines | Infection growth rate |         |                        |          |         |                        |          |         |                        |          |         |                        |
|-------------------------------|-----------------------|---------|------------------------|----------|---------|------------------------|----------|---------|------------------------|----------|---------|------------------------|
|                               | May 2021              |         |                        | Jun 2021 |         |                        | Jul 2021 |         |                        | Aug 2021 |         |                        |
|                               | n                     | $r_s^a$ | $P$ value <sup>b</sup> | n        | $r_s^a$ | $P$ value <sup>b</sup> | n        | $r_s^a$ | $P$ value <sup>b</sup> | n        | $r_s^a$ | $P$ value <sup>b</sup> |
| Dec 2020                      | 27                    | -0.36   | 0.062                  | 27       | -0.25   | 0.205                  | 27       | -0.08   | 0.692                  | 27       | 0.08    | 0.689                  |
| Jan 2021                      | 37                    | -0.49   | <b>0.002</b>           | 37       | -0.49   | <b>0.002</b>           | 37       | -0.08   | 0.647                  | 37       | 0.29    | 0.085                  |
| Feb 2021                      | 47                    | -0.35   | <b>0.015</b>           | 47       | -0.43   | <b>0.003</b>           | 47       | -0.34   | <b>0.021</b>           | 47       | -0.19   | 0.202                  |
| Mar 2021                      | 50                    | -0.46   | <b>0.001</b>           | 50       | -0.52   | <b>0.0001</b>          | 50       | -0.37   | <b>0.008</b>           | 50       | -0.22   | 0.121                  |
| Apr 2021                      | 50                    | -0.46   | <b>0.001</b>           | 50       | -0.56   | <b>&lt;.0001</b>       | 50       | -0.42   | <b>0.002</b>           | 50       | -0.26   | 0.071                  |
| May 2021                      | 50                    | -0.45   | <b>0.001</b>           | 50       | -0.58   | <b>&lt;.0001</b>       | 50       | -0.43   | <b>0.002</b>           | 50       | -0.29   | <b>0.044</b>           |
| Jun 2021                      | 50                    | -0.42   | <b>0.002</b>           | 50       | -0.55   | <b>&lt;.0001</b>       | 50       | -0.40   | <b>0.004</b>           | 50       | -0.26   | 0.065                  |
| Jul 2021                      | 50                    | -0.40   | <b>0.004</b>           | 50       | -0.51   | <b>0.0002</b>          | 50       | -0.37   | <b>0.009</b>           | 50       | -0.27   | 0.060                  |
| Aug 2021                      | 50                    | -0.41   | <b>0.003</b>           | 50       | -0.49   | <b>0.0003</b>          | 50       | -0.33   | <b>0.020</b>           | 50       | -0.20   | 0.168                  |

<sup>a</sup> Spearman Correlation Coefficients.

<sup>b</sup>  $P$  value indicating correlation is significantly different than zero.

**Supplementary Table S49. Association between people covered by vaccines and one-month case fatality rate from December 2020 to August 2021.**

| People covered by<br>vaccines | One-month case fatality rate |                             |                      |          |                             |                      |          |                             |                      |          |                             |                      |          |                             |                      |
|-------------------------------|------------------------------|-----------------------------|----------------------|----------|-----------------------------|----------------------|----------|-----------------------------|----------------------|----------|-----------------------------|----------------------|----------|-----------------------------|----------------------|
|                               | Dec 2020                     |                             |                      | Jan 2021 |                             |                      | Feb 2021 |                             |                      | Mar 2021 |                             |                      | Apr 2021 |                             |                      |
|                               | n                            | r <sub>s</sub> <sup>a</sup> | P value <sup>b</sup> | n        | r <sub>s</sub> <sup>a</sup> | P value <sup>b</sup> | n        | r <sub>s</sub> <sup>a</sup> | P value <sup>b</sup> | n        | r <sub>s</sub> <sup>a</sup> | P value <sup>b</sup> | n        | r <sub>s</sub> <sup>a</sup> | P value <sup>b</sup> |
| Dec 2020                      | 27                           | -0.23                       | 0.249                | 27       | -0.04                       | 0.848                | 27       | 0.15                        | 0.459                | 27       | -0.01                       | 0.968                | 27       | -0.17                       | 0.401                |
| Jan 2021                      | 37                           | -0.12                       | 0.466                | 37       | -0.01                       | 0.959                | 37       | 0.03                        | 0.883                | 37       | -0.10                       | 0.559                | 37       | -0.23                       | 0.175                |
| Feb 2021                      | 47                           | 0.07                        | 0.660                | 47       | 0.03                        | 0.865                | 47       | -0.05                       | 0.735                | 47       | -0.02                       | 0.915                | 47       | -0.03                       | 0.828                |
| Mar 2021                      | 50                           | 0.02                        | 0.873                | 50       | -0.05                       | 0.731                | 50       | -0.14                       | 0.329                | 50       | -0.10                       | 0.472                | 50       | -0.08                       | 0.594                |
| Apr 2021                      | 50                           | 0.05                        | 0.726                | 50       | -0.04                       | 0.774                | 50       | -0.12                       | 0.406                | 50       | -0.10                       | 0.511                | 50       | -0.09                       | 0.526                |
| May 2021                      | 50                           | 0.05                        | 0.734                | 50       | -0.01                       | 0.919                | 50       | -0.11                       | 0.441                | 50       | -0.10                       | 0.497                | 50       | -0.12                       | 0.403                |
| Jun 2021                      | 50                           | -0.03                       | 0.817                | 50       | -0.08                       | 0.562                | 50       | -0.15                       | 0.295                | 50       | -0.15                       | 0.315                | 50       | -0.19                       | 0.187                |
| Jul 2021                      | 50                           | -0.07                       | 0.616                | 50       | -0.15                       | 0.301                | 50       | -0.17                       | 0.248                | 50       | -0.16                       | 0.262                | 50       | -0.23                       | 0.105                |
| Aug 2021                      | 50                           | -0.18                       | 0.207                | 50       | -0.26                       | 0.066                | 50       | -0.27                       | 0.054                | 50       | -0.26                       | 0.067                | 50       | -0.33                       | <b>0.018</b>         |

<sup>a</sup> Spearman Correlation Coefficients.

<sup>b</sup> P value indicating correlation is significantly different than zero.



| People covered by<br>vaccines | One-month case fatality rate |         |                        |          |         |                        |          |         |                        |          |         |                        |
|-------------------------------|------------------------------|---------|------------------------|----------|---------|------------------------|----------|---------|------------------------|----------|---------|------------------------|
|                               | May 2021                     |         |                        | Jun 2021 |         |                        | Jul 2021 |         |                        | Aug 2021 |         |                        |
|                               | n                            | $r_s^a$ | $P$ value <sup>b</sup> | n        | $r_s^a$ | $P$ value <sup>b</sup> | n        | $r_s^a$ | $P$ value <sup>b</sup> | n        | $r_s^a$ | $P$ value <sup>b</sup> |
| Dec 2020                      | 27                           | -0.16   | 0.421                  | 27       | -0.28   | 0.162                  | 27       | -0.21   | 0.302                  | 27       | -0.13   | 0.517                  |
| Jan 2021                      | 37                           | -0.30   | 0.067                  | 37       | -0.40   | <b>0.013</b>           | 37       | -0.53   | <b>0.001</b>           | 37       | -0.58   | <b>0.0002</b>          |
| Feb 2021                      | 47                           | -0.13   | 0.386                  | 47       | -0.24   | 0.104                  | 47       | -0.34   | <b>0.018</b>           | 47       | -0.31   | <b>0.032</b>           |
| Mar 2021                      | 50                           | -0.14   | 0.324                  | 50       | -0.25   | 0.078                  | 50       | -0.41   | <b>0.003</b>           | 50       | -0.42   | <b>0.002</b>           |
| Apr 2021                      | 50                           | -0.15   | 0.312                  | 50       | -0.22   | 0.124                  | 50       | -0.38   | <b>0.006</b>           | 50       | -0.44   | <b>0.001</b>           |
| May 2021                      | 50                           | -0.16   | 0.263                  | 50       | -0.22   | 0.118                  | 50       | -0.40   | <b>0.004</b>           | 50       | -0.45   | <b>0.001</b>           |
| Jun 2021                      | 50                           | -0.24   | 0.091                  | 50       | -0.29   | <b>0.039</b>           | 50       | -0.47   | <b>0.001</b>           | 50       | -0.51   | <b>0.0001</b>          |
| Jul 2021                      | 50                           | -0.31   | <b>0.027</b>           | 50       | -0.33   | <b>0.019</b>           | 50       | -0.50   | <b>0.0002</b>          | 50       | -0.52   | <b>0.0001</b>          |
| Aug 2021                      | 50                           | -0.41   | <b>0.003</b>           | 50       | -0.45   | <b>0.001</b>           | 50       | -0.60   | <b>&lt;.0001</b>       | 50       | -0.58   | <b>&lt;.0001</b>       |

<sup>a</sup> Spearman Correlation Coefficients.

<sup>b</sup>  $P$  value indicating correlation is significantly different than zero.

## Supplementary Information 15. COVID-19 government responses in border closure

Supplementary Table S50. Comparison of the time to border closure among geographic regions.

|                                                                     | N  | Median (IQR)   | <i>P</i> value <sup>c</sup> |
|---------------------------------------------------------------------|----|----------------|-----------------------------|
| <b>Time to any border closure from first reported case in China</b> |    |                |                             |
| <b>(days)<sup>a</sup></b>                                           |    |                |                             |
| Asia                                                                | 18 | 24.50 (24.00)  | <b>0.0003</b>               |
| Non-Asia                                                            | 32 | 67.50 (40.50)  |                             |
| Americas                                                            | 8  | 68.50 (33.00)  | 0.3207                      |
| Non- Americas                                                       | 42 | 33.00 (45.00)  |                             |
| Europe                                                              | 20 | 69.00 (25.00)  | <b>0.0054</b>               |
| Non-Europe                                                          | 30 | 30.50 (46.00)  |                             |
| Oceania                                                             | 2  | 32.50 (1.00)   | 0.8044                      |
| Non-Oceania                                                         | 48 | 48.00 (47.00)  |                             |
| Africa                                                              | 2  | 51.00 (56.00)  | 0.7103                      |
| Non-Africa                                                          | 48 | 36.00 (46.00)  |                             |
| <b>Time to any border closure from first case in reference</b>      |    |                |                             |
| <b>country (days)<sup>b</sup></b>                                   |    |                |                             |
| Asia                                                                | 18 | -10.50 (24.00) | <b>0.0027</b>               |
| Non-Asia                                                            | 32 | 8.00 (21.00)   |                             |
| Americas                                                            | 8  | 3.00 (14.50)   | 0.8219                      |
| Non-Americas                                                        | 42 | 5.00 (36.00)   |                             |
| Europe                                                              | 20 | 14.00 (24.50)  | <b>0.0019</b>               |
| Non-Europe                                                          | 30 | -2.00 (27.00)  |                             |
| Oceania                                                             | 2  | -10.00 (32.00) | 0.4574                      |
| Non-Oceania                                                         | 48 | 5.00 (23.50)   |                             |

|             |    |               |        |
|-------------|----|---------------|--------|
| Africa      | 2  | -4.00 (76.00) | 0.9408 |
| Non- Africa | 48 | 5.00 (22.50)  |        |

---

<sup>a</sup> The first reported case in China was 31 December 2019

<sup>b</sup> Reference country is each index country.

<sup>c</sup> The Mann-Whitney U test.

## Supplemental References

1. EIU. How well have OECD countries responded to the coronavirus crisis? *The Economist Intelligence Unit*, 2020.  
<https://www.eiu.com/n/campaigns/oecd-countries-responded-to-the-coronavirus-crisis/>. Accessed November 25, 2020.
2. OxCGRT. Coronavirus government response tracker. *University of Oxford*, 2020.  
<https://www.bsg.ox.ac.uk/research/research-projects/coronavirus-government-response-tracker>. Accessed November 25, 2020.
3. NLI Research Institute. The impact of coronavirus on national economy—which countries survive from the pandemic, the ranking of 49 countries. *NLI Research Institute*; July 3, 2020.  
<https://www.nli-research.co.jp/report/detail/id=64863?site=nli>. Accessed November 25, 2020.
4. Fernández-Villaverde J, Jones CI. Macroeconomic outcomes and COVID-19: a progress report. *National Bureau of Economic Research* 2020. <https://www.nber.org/papers/w28004>. Accessed March 19, 2021.
5. Penghu County Government. A summary of COVID-19 cases in Taiwan. 2020.  
<https://www.penghu.gov.tw/wuhanpneumonia/home.jsp?id=5&act=view&dataserno=202011300007>. Accessed March 15, 2020.
6. Lin YH, Liu CH, Chiu YC. Google searches for the keywords of “wash hands” predict the speed of national spread of COVID-19 outbreak among 21 countries. *Brain, Behav, and Immun* 2020; **87**: 30–32. doi: 10.1016/j.bbi.2020.04.020.
7. Lin YH, Chiang TW, Lin YL. Increased internet searches for insomnia as an indicator of global mental health during the COVID-19 pandemic: multinational longitudinal study. *J Med Internet Res* 2020; **22(9)**: e22181. doi: 10.2196/22181.
8. Hyndman RJ, Khandakar Y. Automatic time series forecasting: the forecast package for R. *J Stat Soft* 2008; **27(3)**. doi:10.18637/jss.v000.i00.
9. FREOPP. How We Compiled the 2021 FREOPP World Index of Healthcare Innovation.  
<https://freopp.org/wihi-methodology-freopp-world-index-of-healthcare-innovation-10dea21c8c2f>. Accessed December 10, 2021.
10. OxCGRT. Methodology for calculating indices. University of Oxford, 2020.  
[https://github.com/OxCGRT/covid-policy-tracker/blob/master/documentation/index\\_methodology.md](https://github.com/OxCGRT/covid-policy-tracker/blob/master/documentation/index_methodology.md). Accessed December 10, 2021.
